# Supplementary material
Source: publisher figshare collection journal article supplement (https://acs.figshare.com/ndownloader/files/4763062)
Supplement: Supplementary file 1 [file 4763062]

ATOM      1  Fe  STO A   1       8.854   8.876   8.776
ATOM      2  N   STO A   2       9.067  10.232  10.252
ATOM      3  C   STO A   3       9.736  11.452  10.157
ATOM      4  C   STO A   4       9.770  12.117  11.465
ATOM      5  C   STO A   5       9.146  11.252  12.355
ATOM      6  C   STO A   6       8.709  10.097  11.585
ATOM      7  C   STO A   7       7.999   9.009  12.142
ATOM      8  H   STO A   8       7.742   9.051  13.219
ATOM      9  C   STO A   9       7.682   7.829  11.441
ATOM     10  N   STO A  10       8.031   7.594  10.116
ATOM     11  C   STO A  11       7.120   6.626  12.058
ATOM     12  C   STO A  12       7.210   5.623  11.101
ATOM     13  C   STO A  13       7.778   6.248   9.913
ATOM     14  C   STO A  14       8.065   5.539   8.732
ATOM     15  H   STO A  15       7.867   4.451   8.731
ATOM     16  C   STO A  16       8.516   6.119   7.533
ATOM     17  N   STO A  17       8.717   7.476   7.327
ATOM     18  C   STO A  18       8.725   5.370   6.302
ATOM     19  C   STO A  19       8.996   6.293   5.304
ATOM     20  C   STO A  20       9.014   7.593   5.971
ATOM     21  C   STO A  21       9.460   8.777   5.359
ATOM     22  H   STO A  22       9.671   8.757   4.276
ATOM     23  C   STO A  23       9.846   9.930   6.070
ATOM     24  N   STO A  24       9.667  10.143   7.425
ATOM     25  C   STO A  25      10.681  10.967   5.479
ATOM     26  C   STO A  26      11.029  11.824   6.516
ATOM     27  C   STO A  27      10.347  11.318   7.716
ATOM     28  C   STO A  28      10.356  11.946   8.985
ATOM     29  H   STO A  29      10.916  12.895   9.065
ATOM     30  C   STO A  30       5.020  10.567   7.316
ATOM     31  N   STO A  31       5.290  11.309   8.461
ATOM     32  H   STO A  32       4.706  12.066   8.859
ATOM     33  C   STO A  33       6.431  10.832   9.032
ATOM     34  H   STO A  34       6.876  11.272   9.944
ATOM     35  N   STO A  35       6.930   9.801   8.318
ATOM     36  C   STO A  36       6.060   9.625   7.245
ATOM     37  H   STO A  37       6.231   8.830   6.496
ATOM     38  O   STO A  38      10.517   8.282   9.292
ATOM     39  O   STO A  39      11.391   7.901   8.413
ATOM     40  H   STO A  40       9.125   6.113   4.210
ATOM     41  H   STO A  41       6.964   4.537  11.142
ATOM     42  H   STO A  42      11.842  12.581   6.480
ATOM     43  H   STO A  43      10.138  13.140  11.699
ATOM     44  H   STO A  44       8.751   4.265   6.245
ATOM     45  H   STO A  45       6.731   6.569  13.091
ATOM     46  H   STO A  46       9.063  11.297  13.456
ATOM     47  H   STO A  47      11.060  10.920   4.441
ATOM     48  H   STO A  48       4.146  10.758   6.672
ATOM     49  CAA HEMLA   1      10.266  13.497  11.781
ATOM     50  HAA1HEMLA   1      10.861  13.894  10.966
ATOM     51  HAA2HEMLA   1      10.909  13.430  12.655
ATOM     52  CBA HEMLA   1       9.117  14.464  12.092
ATOM     53  HBA1HEMLA   1       8.550  14.055  12.927
ATOM     54  HBA2HEMLA   1       9.543  15.413  12.422
ATOM     55  CGA HEMLA   1       8.170  14.703  10.901
ATOM     56  O1A HEMLA   1       7.001  14.280  11.050
ATOM     57  O2A HEMLA   1       8.313  15.813  10.326
ATOM     58  CMA HEMLA   1       9.033  11.314  13.860
ATOM     59  HMA1HEMLA   1       7.999  11.223  14.181
ATOM     60  HMA2HEMLA   1       9.598  10.489  14.293
ATOM     61  HMA3HEMLA   1       9.434  12.255  14.236
ATOM     62  CMB HEMLA   1       6.590   6.549  13.466
ATOM     63  HMB1HEMLA   1       7.415   6.616  14.175
ATOM     64  HMB2HEMLA   1       5.885   7.361  13.646
ATOM     65  HMB3HEMLA   1       6.073   5.598  13.606
ATOM     66  CAB HEMLA   1       6.880   4.167  11.156
ATOM     67  HAB HEMLA   1       6.188   3.753  10.427
ATOM     68  CBB HEMLA   1       7.447   3.393  12.079
ATOM     69  HBB1HEMLA   1       7.227   2.335  12.132
ATOM     70  HBB2HEMLA   1       8.137   3.830  12.787
ATOM     71  CMC HEMLA   1       8.760   3.872   6.224
ATOM     72  HMC1HEMLA   1       9.578   3.506   6.845
ATOM     73  HMC2HEMLA   1       7.820   3.457   6.578
ATOM     74  HMC3HEMLA   1       8.932   3.559   5.195
ATOM     75  CAC HEMLA   1       9.168   6.053   3.842
ATOM     76  HAC HEMLA   1       8.361   5.565   3.310
ATOM     77  CBC HEMLA   1      10.252   6.469   3.195
ATOM     78  HBC1HEMLA   1      10.326   6.351   2.130
ATOM     79  HBC2HEMLA   1      11.055   6.969   3.721
ATOM     80  CMD HEMLA   1      11.200  10.903   4.058
ATOM     81  HMD1HEMLA   1      11.714   9.955   3.891
ATOM     82  HMD2HEMLA   1      10.380  10.988   3.346
ATOM     83  HMD3HEMLA   1      11.907  11.710   3.870
ATOM     84  CAD HEMLA   1      12.124  12.843   6.468
ATOM     85  HAD1HEMLA   1      11.917  13.630   7.179
ATOM     86  HAD2HEMLA   1      12.145  13.303   5.483
ATOM     87  CBD HEMLA   1      13.482  12.195   6.747
ATOM     88  HBD1HEMLA   1      13.321  11.134   6.920
ATOM     89  HBD2HEMLA   1      14.114  12.295   5.861
ATOM     90  CGD HEMLA   1      14.196  12.769   7.970
ATOM     91  O1D HEMLA   1      15.174  13.509   7.736
ATOM     92  O2D HEMLA   1      13.529  12.944   9.016
ATOM     93  HH31ACE A   2     -10.881  -2.002  17.584
ATOM     94  CH3 ACE A   2     -10.116  -1.622  16.908
ATOM     95  HH32ACE A   2      -9.931  -2.348  16.119
ATOM     96  HH33ACE A   2     -10.457  -0.682  16.477
ATOM     97  C   ACE A   2      -8.828  -1.383  17.661
ATOM     98  O   ACE A   2      -8.144  -0.395  17.396
ATOM     99  N   VAL A   3      -8.513  -2.273  18.606
ATOM    100  H   VAL A   3      -9.124  -3.069  18.745
ATOM    101  CA  VAL A   3      -7.326  -2.184  19.475
ATOM    102  HA  VAL A   3      -6.556  -1.620  18.954
ATOM    103  CB  VAL A   3      -7.638  -1.442  20.798
ATOM    104  HB  VAL A   3      -6.741  -1.478  21.416
ATOM    105  CG1 VAL A   3      -7.956   0.041  20.574
ATOM    106  HG11VAL A   3      -8.085   0.539  21.535
ATOM    107  HG12VAL A   3      -8.872   0.148  19.996
ATOM    108  HG13VAL A   3      -7.137   0.521  20.040
ATOM    109  CG2 VAL A   3      -8.780  -2.090  21.597
ATOM    110  HG21VAL A   3      -9.728  -1.979  21.069
ATOM    111  HG22VAL A   3      -8.856  -1.611  22.572
ATOM    112  HG23VAL A   3      -8.579  -3.147  21.757
ATOM    113  C   VAL A   3      -6.742  -3.568  19.782
ATOM    114  O   VAL A   3      -7.378  -4.605  19.572
ATOM    115  N   LEU A   4      -5.530  -3.616  20.334
ATOM    116  H   LEU A   4      -5.027  -2.755  20.480
ATOM    117  CA  LEU A   4      -5.024  -4.805  21.022
ATOM    118  HA  LEU A   4      -5.236  -5.704  20.439
ATOM    119  CB  LEU A   4      -3.505  -4.665  21.193
ATOM    120  HB2 LEU A   4      -3.264  -3.626  21.368
ATOM    121  HB3 LEU A   4      -3.198  -5.210  22.083
ATOM    122  CG  LEU A   4      -2.660  -5.156  20.013
ATOM    123  HG  LEU A   4      -2.827  -6.224  19.869
ATOM    124  CD1 LEU A   4      -2.963  -4.433  18.700
ATOM    125  HD11LEU A   4      -2.269  -4.775  17.939
ATOM    126  HD12LEU A   4      -2.852  -3.356  18.828
ATOM    127  HD13LEU A   4      -3.974  -4.664  18.368
ATOM    128  CD2 LEU A   4      -1.190  -4.922  20.355
ATOM    129  HD21LEU A   4      -0.995  -3.853  20.449
ATOM    130  HD22LEU A   4      -0.568  -5.341  19.571
ATOM    131  HD23LEU A   4      -0.931  -5.408  21.291
ATOM    132  C   LEU A   4      -5.705  -4.942  22.396
ATOM    133  O   LEU A   4      -6.083  -3.943  23.016
ATOM    134  N   SER A   5      -5.825  -6.178  22.892
ATOM    135  H   SER A   5      -5.501  -6.959  22.326
ATOM    136  CA  SER A   5      -6.135  -6.454  24.301
ATOM    137  HA  SER A   5      -7.061  -5.945  24.557
ATOM    138  CB  SER A   5      -6.365  -7.952  24.556
ATOM    139  HB2 SER A   5      -6.541  -8.113  25.620
ATOM    140  HB3 SER A   5      -7.253  -8.268  24.015
ATOM    141  OG  SER A   5      -5.270  -8.749  24.148
ATOM    142  HG  SER A   5      -5.245  -8.709  23.134
ATOM    143  C   SER A   5      -5.020  -5.926  25.206
ATOM    144  O   SER A   5      -3.870  -5.789  24.781
ATOM    145  N   GLU A   6      -5.324  -5.665  26.482
ATOM    146  H   GLU A   6      -6.278  -5.775  26.799
ATOM    147  CA  GLU A   6      -4.309  -5.237  27.453
ATOM    148  HA  GLU A   6      -3.883  -4.296  27.108
ATOM    149  CB  GLU A   6      -4.954  -5.021  28.828
ATOM    150  HB2 GLU A   6      -5.801  -5.698  28.951
ATOM    151  HB3 GLU A   6      -4.224  -5.265  29.597
ATOM    152  CG  GLU A   6      -5.420  -3.574  29.039
ATOM    153  HG2 GLU A   6      -6.093  -3.295  28.226
ATOM    154  HG3 GLU A   6      -5.980  -3.521  29.974
ATOM    155  CD  GLU A   6      -4.254  -2.579  29.113
ATOM    156  OE1 GLU A   6      -3.152  -2.947  29.608
ATOM    157  OE2 GLU A   6      -4.438  -1.407  28.696
ATOM    158  C   GLU A   6      -3.130  -6.216  27.565
ATOM    159  O   GLU A   6      -1.994  -5.774  27.757
ATOM    160  N   GLY A   7      -3.391  -7.514  27.375
ATOM    161  H   GLY A   7      -4.365  -7.793  27.348
ATOM    162  CA  GLY A   7      -2.392  -8.576  27.338
ATOM    163  HA2 GLY A   7      -1.626  -8.361  28.083
ATOM    164  HA3 GLY A   7      -2.874  -9.515  27.613
ATOM    165  C   GLY A   7      -1.709  -8.780  25.979
ATOM    166  O   GLY A   7      -0.753  -9.557  25.907
ATOM    167  N   GLU A   8      -2.156  -8.111  24.909
ATOM    168  H   GLU A   8      -2.984  -7.528  25.015
ATOM    169  CA  GLU A   8      -1.406  -7.992  23.648
ATOM    170  HA  GLU A   8      -0.725  -8.834  23.524
ATOM    171  CB  GLU A   8      -2.366  -7.963  22.446
ATOM    172  HB2 GLU A   8      -3.196  -7.303  22.686
ATOM    173  HB3 GLU A   8      -1.842  -7.567  21.578
ATOM    174  CG  GLU A   8      -2.906  -9.345  22.068
ATOM    175  HG2 GLU A   8      -2.137  -9.886  21.514
ATOM    176  HG3 GLU A   8      -3.125  -9.904  22.973
ATOM    177  CD  GLU A   8      -4.201  -9.276  21.252
ATOM    178  OE1 GLU A   8      -5.168  -8.618  21.715
ATOM    179  OE2 GLU A   8      -4.318 -10.002  20.229
ATOM    180  C   GLU A   8      -0.556  -6.716  23.674
ATOM    181  O   GLU A   8       0.632  -6.769  23.347
ATOM    182  N   TRP A   9      -1.116  -5.595  24.160
ATOM    183  H   TRP A   9      -2.109  -5.600  24.389
ATOM    184  CA  TRP A   9      -0.341  -4.393  24.483
ATOM    185  HA  TRP A   9       0.124  -4.024  23.570
ATOM    186  CB  TRP A   9      -1.240  -3.291  25.059
ATOM    187  HB2 TRP A   9      -1.854  -3.708  25.859
ATOM    188  HB3 TRP A   9      -0.599  -2.534  25.509
ATOM    189  CG  TRP A   9      -2.122  -2.576  24.083
ATOM    190  CD1 TRP A   9      -3.466  -2.471  24.172
ATOM    191  HD1 TRP A   9      -4.076  -2.908  24.953
ATOM    192  NE1 TRP A   9      -3.946  -1.707  23.129
ATOM    193  HE1 TRP A   9      -4.926  -1.436  23.058
ATOM    194  CE2 TRP A   9      -2.933  -1.309  22.282
ATOM    195  CZ2 TRP A   9      -2.915  -0.583  21.081
ATOM    196  HZ2 TRP A   9      -3.838  -0.223  20.650
ATOM    197  CH2 TRP A   9      -1.681  -0.310  20.466
ATOM    198  HH2 TRP A   9      -1.641   0.254  19.544
ATOM    199  CZ3 TRP A   9      -0.490  -0.762  21.061
ATOM    200  HZ3 TRP A   9       0.460  -0.533  20.601
ATOM    201  CE3 TRP A   9      -0.520  -1.508  22.254
ATOM    202  HE3 TRP A   9       0.407  -1.845  22.694
ATOM    203  CD2 TRP A   9      -1.744  -1.820  22.887
ATOM    204  C   TRP A   9       0.787  -4.705  25.469
ATOM    205  O   TRP A   9       1.907  -4.246  25.259
ATOM    206  N   GLN A  10       0.528  -5.530  26.495
ATOM    207  H   GLN A  10      -0.434  -5.807  26.674
ATOM    208  CA  GLN A  10       1.559  -5.998  27.422
ATOM    209  HA  GLN A  10       1.904  -5.138  27.998
ATOM    210  CB  GLN A  10       0.970  -7.025  28.404
ATOM    211  HB2 GLN A  10       0.129  -6.561  28.914
ATOM    212  HB3 GLN A  10       0.593  -7.887  27.854
ATOM    213  CG  GLN A  10       1.954  -7.493  29.489
ATOM    214  HG2 GLN A  10       2.628  -6.681  29.760
ATOM    215  HG3 GLN A  10       1.369  -7.735  30.374
ATOM    216  CD  GLN A  10       2.748  -8.747  29.119
ATOM    217  OE1 GLN A  10       2.214  -9.854  29.129
ATOM    218  NE2 GLN A  10       4.022  -8.616  28.809
ATOM    219  HE21GLN A  10       4.581  -9.452  28.622
ATOM    220  HE22GLN A  10       4.442  -7.700  28.763
ATOM    221  C   GLN A  10       2.760  -6.581  26.678
ATOM    222  O   GLN A  10       3.884  -6.194  26.994
ATOM    223  N   LEU A  11       2.527  -7.463  25.697
ATOM    224  H   LEU A  11       1.569  -7.672  25.453
ATOM    225  CA  LEU A  11       3.586  -8.113  24.923
ATOM    226  HA  LEU A  11       4.310  -8.543  25.614
ATOM    227  CB  LEU A  11       2.992  -9.237  24.055
ATOM    228  HB2 LEU A  11       2.222  -8.814  23.410
ATOM    229  HB3 LEU A  11       3.776  -9.636  23.410
ATOM    230  CG  LEU A  11       2.385 -10.402  24.859
ATOM    231  HG  LEU A  11       1.707 -10.012  25.614
ATOM    232  CD1 LEU A  11       1.594 -11.310  23.917
ATOM    233  HD11LEU A  11       2.260 -11.717  23.157
ATOM    234  HD12LEU A  11       0.802 -10.741  23.431
ATOM    235  HD13LEU A  11       1.149 -12.128  24.484
ATOM    236  CD2 LEU A  11       3.454 -11.241  25.559
ATOM    237  HD21LEU A  11       3.997 -10.634  26.281
ATOM    238  HD22LEU A  11       4.153 -11.648  24.827
ATOM    239  HD23LEU A  11       2.985 -12.067  26.094
ATOM    240  C   LEU A  11       4.336  -7.103  24.049
ATOM    241  O   LEU A  11       5.571  -7.101  24.061
ATOM    242  N   VAL A  12       3.612  -6.221  23.347
ATOM    243  H   VAL A  12       2.596  -6.288  23.392
ATOM    244  CA  VAL A  12       4.214  -5.136  22.553
ATOM    245  HA  VAL A  12       4.839  -5.571  21.773
ATOM    246  CB  VAL A  12       3.110  -4.290  21.880
ATOM    247  HB  VAL A  12       2.348  -4.035  22.616
ATOM    248  CG1 VAL A  12       3.627  -2.980  21.269
ATOM    249  HG11VAL A  12       2.829  -2.498  20.705
ATOM    250  HG12VAL A  12       4.467  -3.180  20.606
ATOM    251  HG13VAL A  12       3.945  -2.292  22.053
ATOM    252  CG2 VAL A  12       2.456  -5.114  20.768
ATOM    253  HG21VAL A  12       3.202  -5.395  20.027
ATOM    254  HG22VAL A  12       1.676  -4.529  20.291
ATOM    255  HG23VAL A  12       2.005  -6.012  21.184
ATOM    256  C   VAL A  12       5.126  -4.267  23.419
ATOM    257  O   VAL A  12       6.282  -4.035  23.073
ATOM    258  N   LEU A  13       4.625  -3.822  24.573
ATOM    259  H   LEU A  13       3.660  -4.058  24.802
ATOM    260  CA  LEU A  13       5.327  -2.894  25.456
ATOM    261  HA  LEU A  13       5.789  -2.127  24.839
ATOM    262  CB  LEU A  13       4.288  -2.215  26.366
ATOM    263  HB2 LEU A  13       3.761  -2.989  26.926
ATOM    264  HB3 LEU A  13       4.803  -1.573  27.083
ATOM    265  CG  LEU A  13       3.260  -1.365  25.580
ATOM    266  HG  LEU A  13       2.843  -1.940  24.755
ATOM    267  CD1 LEU A  13       2.101  -0.966  26.490
ATOM    268  HD11LEU A  13       2.474  -0.397  27.336
ATOM    269  HD12LEU A  13       1.612  -1.869  26.855
ATOM    270  HD13LEU A  13       1.387  -0.368  25.926
ATOM    271  CD2 LEU A  13       3.876  -0.097  24.988
ATOM    272  HD21LEU A  13       4.312   0.513  25.778
ATOM    273  HD22LEU A  13       3.105   0.467  24.464
ATOM    274  HD23LEU A  13       4.650  -0.355  24.266
ATOM    275  C   LEU A  13       6.473  -3.565  26.237
ATOM    276  O   LEU A  13       7.464  -2.897  26.538
ATOM    277  N   HID A  14       6.382  -4.879  26.489
ATOM    278  H   HID A  14       5.514  -5.349  26.252
ATOM    279  CA  HID A  14       7.433  -5.689  27.116
ATOM    280  HA  HID A  14       7.748  -5.198  28.039
ATOM    281  CB  HID A  14       6.869  -7.072  27.472
ATOM    282  HB2 HID A  14       6.070  -6.926  28.194
ATOM    283  HB3 HID A  14       6.439  -7.531  26.583
ATOM    284  CG  HID A  14       7.851  -8.042  28.085
ATOM    285  ND1 HID A  14       8.074  -8.218  29.431
ATOM    286  HD1 HID A  14       7.651  -7.698  30.194
ATOM    287  CE1 HID A  14       8.889  -9.271  29.593
ATOM    288  HE1 HID A  14       9.215  -9.655  30.553
ATOM    289  NE2 HID A  14       9.198  -9.811  28.405
ATOM    290  CD2 HID A  14       8.557  -9.024  27.437
ATOM    291  HD2 HID A  14       8.554  -9.208  26.370
ATOM    292  C   HID A  14       8.657  -5.834  26.211
ATOM    293  O   HID A  14       9.776  -5.623  26.691
ATOM    294  N   VAL A  15       8.447  -6.150  24.917
ATOM    295  H   VAL A  15       7.492  -6.293  24.601
ATOM    296  CA  VAL A  15       9.535  -6.159  23.926
ATOM    297  HA  VAL A  15      10.390  -6.644  24.398
ATOM    298  CB  VAL A  15       9.211  -6.982  22.657
ATOM    299  HB  VAL A  15       8.855  -7.962  22.974
ATOM    300  CG1 VAL A  15       8.141  -6.365  21.748
ATOM    301  HG11VAL A  15       7.210  -6.256  22.297
ATOM    302  HG12VAL A  15       7.956  -7.012  20.894
ATOM    303  HG13VAL A  15       8.458  -5.391  21.376
ATOM    304  CG2 VAL A  15      10.484  -7.204  21.826
ATOM    305  HG21VAL A  15      10.880  -6.255  21.466
ATOM    306  HG22VAL A  15      10.265  -7.830  20.964
ATOM    307  HG23VAL A  15      11.242  -7.701  22.432
ATOM    308  C   VAL A  15       9.980  -4.735  23.589
ATOM    309  O   VAL A  15      11.175  -4.506  23.451
ATOM    310  N   TRP A  16       9.080  -3.747  23.553
ATOM    311  H   TRP A  16       8.085  -3.969  23.573
ATOM    312  CA  TRP A  16       9.477  -2.345  23.405
ATOM    313  HA  TRP A  16      10.019  -2.249  22.464
ATOM    314  CB  TRP A  16       8.231  -1.463  23.316
ATOM    315  HB2 TRP A  16       7.515  -1.908  22.626
ATOM    316  HB3 TRP A  16       7.768  -1.373  24.297
ATOM    317  CG  TRP A  16       8.555  -0.113  22.799
ATOM    318  CD1 TRP A  16       8.846   0.964  23.556
ATOM    319  HD1 TRP A  16       8.837   0.977  24.637
ATOM    320  NE1 TRP A  16       9.276   1.986  22.742
ATOM    321  HE1 TRP A  16       9.702   2.840  23.115
ATOM    322  CE2 TRP A  16       9.319   1.596  21.423
ATOM    323  CZ2 TRP A  16       9.767   2.224  20.261
ATOM    324  HZ2 TRP A  16      10.209   3.198  20.327
ATOM    325  CH2 TRP A  16       9.611   1.580  19.025
ATOM    326  HH2 TRP A  16       9.906   2.082  18.117
ATOM    327  CZ3 TRP A  16       9.067   0.284  18.975
ATOM    328  HZ3 TRP A  16       8.963  -0.218  18.023
ATOM    329  CE3 TRP A  16       8.678  -0.369  20.162
ATOM    330  HE3 TRP A  16       8.290  -1.376  20.123
ATOM    331  CD2 TRP A  16       8.790   0.276  21.415
ATOM    332  C   TRP A  16      10.427  -1.881  24.528
ATOM    333  O   TRP A  16      11.441  -1.231  24.271
ATOM    334  N   ALA A  17      10.166  -2.324  25.763
ATOM    335  H   ALA A  17       9.281  -2.801  25.923
ATOM    336  CA  ALA A  17      11.058  -2.183  26.911
ATOM    337  HA  ALA A  17      11.351  -1.134  26.972
ATOM    338  CB  ALA A  17      10.232  -2.516  28.158
ATOM    339  HB1 ALA A  17      10.861  -2.553  29.045
ATOM    340  HB2 ALA A  17       9.728  -3.469  28.035
ATOM    341  HB3 ALA A  17       9.461  -1.757  28.296
ATOM    342  C   ALA A  17      12.376  -2.999  26.809
ATOM    343  O   ALA A  17      13.293  -2.787  27.616
ATOM    344  N   LYS A  18      12.528  -3.863  25.793
ATOM    345  H   LYS A  18      11.734  -4.029  25.182
ATOM    346  CA  LYS A  18      13.814  -4.431  25.369
ATOM    347  HA  LYS A  18      14.540  -4.334  26.177
ATOM    348  CB  LYS A  18      13.671  -5.927  25.038
ATOM    349  HB2 LYS A  18      13.026  -6.059  24.170
ATOM    350  HB3 LYS A  18      14.652  -6.299  24.759
ATOM    351  CG  LYS A  18      13.160  -6.832  26.166
ATOM    352  HG2 LYS A  18      12.094  -6.670  26.308
ATOM    353  HG3 LYS A  18      13.312  -7.851  25.830
ATOM    354  CD  LYS A  18      13.892  -6.641  27.502
ATOM    355  HD2 LYS A  18      14.967  -6.616  27.320
ATOM    356  HD3 LYS A  18      13.588  -5.688  27.929
ATOM    357  CE  LYS A  18      13.615  -7.747  28.528
ATOM    358  HE2 LYS A  18      14.011  -8.695  28.149
ATOM    359  HE3 LYS A  18      14.150  -7.507  29.445
ATOM    360  NZ  LYS A  18      12.176  -7.906  28.827
ATOM    361  HZ1 LYS A  18      11.792  -8.611  28.190
ATOM    362  HZ2 LYS A  18      11.676  -7.023  28.737
ATOM    363  HZ3 LYS A  18      12.027  -8.198  29.790
ATOM    364  C   LYS A  18      14.421  -3.687  24.169
ATOM    365  O   LYS A  18      15.647  -3.564  24.130
ATOM    366  N   VAL A  19      13.613  -3.152  23.242
ATOM    367  H   VAL A  19      12.625  -3.376  23.303
ATOM    368  CA  VAL A  19      14.062  -2.301  22.117
ATOM    369  HA  VAL A  19      14.789  -2.855  21.526
ATOM    370  CB  VAL A  19      12.875  -1.930  21.192
ATOM    371  HB  VAL A  19      12.066  -1.533  21.799
ATOM    372  CG1 VAL A  19      13.224  -0.865  20.140
ATOM    373  HG11VAL A  19      12.362  -0.685  19.496
ATOM    374  HG12VAL A  19      14.058  -1.205  19.529
ATOM    375  HG13VAL A  19      13.483   0.080  20.619
ATOM    376  CG2 VAL A  19      12.353  -3.159  20.435
ATOM    377  HG21VAL A  19      11.471  -2.889  19.855
ATOM    378  HG22VAL A  19      12.083  -3.951  21.129
ATOM    379  HG23VAL A  19      13.128  -3.535  19.766
ATOM    380  C   VAL A  19      14.753  -1.041  22.644
ATOM    381  O   VAL A  19      15.854  -0.685  22.210
ATOM    382  N   GLU A  20      14.129  -0.391  23.630
ATOM    383  H   GLU A  20      13.205  -0.720  23.916
ATOM    384  CA  GLU A  20      14.625   0.849  24.228
ATOM    385  HA  GLU A  20      14.908   1.523  23.420
ATOM    386  CB  GLU A  20      13.515   1.527  25.038
ATOM    387  HB2 GLU A  20      13.080   0.818  25.745
ATOM    388  HB3 GLU A  20      13.933   2.372  25.585
ATOM    389  CG  GLU A  20      12.445   2.058  24.082
ATOM    390  HG2 GLU A  20      12.933   2.683  23.332
ATOM    391  HG3 GLU A  20      11.966   1.231  23.559
ATOM    392  CD  GLU A  20      11.371   2.881  24.785
ATOM    393  OE1 GLU A  20      11.025   2.619  25.970
ATOM    394  OE2 GLU A  20      10.809   3.779  24.108
ATOM    395  C   GLU A  20      15.884   0.667  25.076
ATOM    396  O   GLU A  20      16.470   1.672  25.496
ATOM    397  N   ALA A  21      16.340  -0.573  25.290
ATOM    398  H   ALA A  21      15.813  -1.356  24.925
ATOM    399  CA  ALA A  21      17.673  -0.840  25.811
ATOM    400  HA  ALA A  21      17.759  -0.354  26.774
ATOM    401  CB  ALA A  21      17.849  -2.341  26.035
ATOM    402  HB1 ALA A  21      18.752  -2.522  26.620
ATOM    403  HB2 ALA A  21      17.948  -2.852  25.077
ATOM    404  HB3 ALA A  21      16.989  -2.738  26.575
ATOM    405  C   ALA A  21      18.780  -0.299  24.896
ATOM    406  O   ALA A  21      19.843   0.069  25.406
ATOM    407  N   ASP A  22      18.518  -0.228  23.583
ATOM    408  H   ASP A  22      17.594  -0.516  23.271
ATOM    409  CA  ASP A  22      19.512   0.024  22.535
ATOM    410  HA  ASP A  22      20.232   0.766  22.885
ATOM    411  CB  ASP A  22      20.257  -1.289  22.283
ATOM    412  HB2 ASP A  22      20.741  -1.607  23.208
ATOM    413  HB3 ASP A  22      19.535  -2.058  22.001
ATOM    414  CG  ASP A  22      21.331  -1.194  21.203
ATOM    415  OD1 ASP A  22      22.150  -0.239  21.209
ATOM    416  OD2 ASP A  22      21.421  -2.174  20.425
ATOM    417  C   ASP A  22      18.837   0.581  21.266
ATOM    418  O   ASP A  22      18.979   0.048  20.163
ATOM    419  N   VAL A  23      18.013   1.623  21.421
ATOM    420  H   VAL A  23      17.923   2.026  22.343
ATOM    421  CA  VAL A  23      17.214   2.175  20.314
ATOM    422  HA  VAL A  23      16.666   1.339  19.882
ATOM    423  CB  VAL A  23      16.147   3.151  20.849
ATOM    424  HB  VAL A  23      15.597   2.636  21.635
ATOM    425  CG1 VAL A  23      16.736   4.418  21.462
ATOM    426  HG11VAL A  23      15.938   5.058  21.835
ATOM    427  HG12VAL A  23      17.322   4.963  20.726
ATOM    428  HG13VAL A  23      17.385   4.158  22.291
ATOM    429  CG2 VAL A  23      15.129   3.529  19.775
ATOM    430  HG21VAL A  23      14.358   4.170  20.205
ATOM    431  HG22VAL A  23      14.653   2.625  19.400
ATOM    432  HG23VAL A  23      15.613   4.054  18.952
ATOM    433  C   VAL A  23      18.079   2.744  19.170
ATOM    434  O   VAL A  23      17.735   2.534  18.007
ATOM    435  N   ALA A  24      19.250   3.334  19.467
ATOM    436  H   ALA A  24      19.442   3.556  20.439
ATOM    437  CA  ALA A  24      20.298   3.682  18.490
ATOM    438  HA  ALA A  24      19.848   4.282  17.698
ATOM    439  CB  ALA A  24      21.349   4.540  19.202
ATOM    440  HB1 ALA A  24      20.889   5.457  19.565
ATOM    441  HB2 ALA A  24      22.146   4.802  18.511
ATOM    442  HB3 ALA A  24      21.779   3.988  20.039
ATOM    443  C   ALA A  24      20.975   2.472  17.806
ATOM    444  O   ALA A  24      21.717   2.637  16.829
ATOM    445  N   GLY A  25      20.707   1.252  18.283
ATOM    446  H   GLY A  25      20.124   1.164  19.110
ATOM    447  CA  GLY A  25      21.065   0.020  17.596
ATOM    448  HA2 GLY A  25      21.932   0.175  16.956
ATOM    449  HA3 GLY A  25      21.318  -0.733  18.341
ATOM    450  C   GLY A  25      19.895  -0.494  16.761
ATOM    451  O   GLY A  25      20.071  -0.752  15.566
ATOM    452  N   HID A  26      18.702  -0.594  17.358
ATOM    453  H   HID A  26      18.643  -0.379  18.352
ATOM    454  CA  HID A  26      17.495  -1.062  16.673
ATOM    455  HA  HID A  26      17.694  -2.060  16.279
ATOM    456  CB  HID A  26      16.330  -1.161  17.671
ATOM    457  HB2 HID A  26      16.194  -0.207  18.182
ATOM    458  HB3 HID A  26      15.413  -1.394  17.128
ATOM    459  CG  HID A  26      16.568  -2.250  18.678
ATOM    460  ND1 HID A  26      16.896  -2.098  20.003
ATOM    461  HD1 HID A  26      16.833  -1.243  20.552
ATOM    462  CE1 HID A  26      17.219  -3.306  20.489
ATOM    463  HE1 HID A  26      17.524  -3.498  21.509
ATOM    464  NE2 HID A  26      17.127  -4.241  19.529
ATOM    465  CD2 HID A  26      16.659  -3.582  18.393
ATOM    466  HD2 HID A  26      16.489  -4.029  17.427
ATOM    467  C   HID A  26      17.112  -0.191  15.475
ATOM    468  O   HID A  26      16.877  -0.732  14.398
ATOM    469  N   GLY A  27      17.094   1.139  15.630
ATOM    470  H   GLY A  27      17.323   1.534  16.542
ATOM    471  CA  GLY A  27      16.716   2.063  14.560
ATOM    472  HA2 GLY A  27      15.691   1.865  14.243
ATOM    473  HA3 GLY A  27      16.775   3.075  14.952
ATOM    474  C   GLY A  27      17.624   1.953  13.339
ATOM    475  O   GLY A  27      17.131   1.912  12.215
ATOM    476  N   GLN A  28      18.934   1.820  13.568
ATOM    477  H   GLN A  28      19.261   1.806  14.523
ATOM    478  CA  GLN A  28      19.904   1.608  12.502
ATOM    479  HA  GLN A  28      19.778   2.403  11.765
ATOM    480  CB  GLN A  28      21.327   1.692  13.075
ATOM    481  HB2 GLN A  28      21.412   2.572  13.713
ATOM    482  HB3 GLN A  28      21.538   0.807  13.679
ATOM    483  CG  GLN A  28      22.354   1.807  11.940
ATOM    484  HG2 GLN A  28      22.286   0.936  11.291
ATOM    485  HG3 GLN A  28      22.122   2.691  11.346
ATOM    486  CD  GLN A  28      23.791   1.911  12.437
ATOM    487  OE1 GLN A  28      24.175   1.376  13.476
ATOM    488  NE2 GLN A  28      24.641   2.585  11.691
ATOM    489  HE21GLN A  28      25.623   2.582  11.949
ATOM    490  HE22GLN A  28      24.373   2.945  10.773
ATOM    491  C   GLN A  28      19.668   0.268  11.792
ATOM    492  O   GLN A  28      19.584   0.244  10.567
ATOM    493  N   ASP A  29      19.515  -0.837  12.536
ATOM    494  H   ASP A  29      19.566  -0.764  13.549
ATOM    495  CA  ASP A  29      19.261  -2.153  11.934
ATOM    496  HA  ASP A  29      20.043  -2.340  11.197
ATOM    497  CB  ASP A  29      19.337  -3.247  13.010
ATOM    498  HB2 ASP A  29      19.068  -2.850  13.990
ATOM    499  HB3 ASP A  29      18.638  -4.047  12.766
ATOM    500  CG  ASP A  29      20.734  -3.855  13.038
ATOM    501  OD1 ASP A  29      21.087  -4.576  12.077
ATOM    502  OD2 ASP A  29      21.514  -3.618  13.985
ATOM    503  C   ASP A  29      17.931  -2.230  11.171
ATOM    504  O   ASP A  29      17.873  -2.833  10.096
ATOM    505  N   ILE A  30      16.878  -1.602  11.708
ATOM    506  H   ILE A  30      16.993  -1.170  12.625
ATOM    507  CA  ILE A  30      15.562  -1.499  11.067
ATOM    508  HA  ILE A  30      15.213  -2.501  10.814
ATOM    509  CB  ILE A  30      14.553  -0.870  12.062
ATOM    510  HB  ILE A  30      15.032  -0.023  12.556
ATOM    511  CG2 ILE A  30      13.277  -0.353  11.376
ATOM    512  HG21ILE A  30      13.523   0.432  10.661
ATOM    513  HG22ILE A  30      12.598   0.084  12.107
ATOM    514  HG23ILE A  30      12.769  -1.166  10.860
ATOM    515  CG1 ILE A  30      14.174  -1.932  13.118
ATOM    516  HG12ILE A  30      13.502  -2.660  12.667
ATOM    517  HG13ILE A  30      15.069  -2.463  13.432
ATOM    518  CD1 ILE A  30      13.531  -1.372  14.390
ATOM    519  HD11ILE A  30      12.654  -0.778  14.150
ATOM    520  HD12ILE A  30      14.248  -0.748  14.916
ATOM    521  HD13ILE A  30      13.236  -2.196  15.040
ATOM    522  C   ILE A  30      15.664  -0.739   9.741
ATOM    523  O   ILE A  30      15.254  -1.259   8.702
ATOM    524  N   LEU A  31      16.261   0.454   9.751
ATOM    525  H   LEU A  31      16.600   0.830  10.632
ATOM    526  CA  LEU A  31      16.457   1.241   8.536
ATOM    527  HA  LEU A  31      15.502   1.293   8.017
ATOM    528  CB  LEU A  31      16.864   2.672   8.917
ATOM    529  HB2 LEU A  31      17.752   2.629   9.550
ATOM    530  HB3 LEU A  31      17.121   3.205   8.003
ATOM    531  CG  LEU A  31      15.743   3.448   9.646
ATOM    532  HG  LEU A  31      15.355   2.861  10.477
ATOM    533  CD1 LEU A  31      16.278   4.759  10.214
ATOM    534  HD11LEU A  31      15.489   5.268  10.765
ATOM    535  HD12LEU A  31      16.613   5.392   9.401
ATOM    536  HD13LEU A  31      17.112   4.554  10.885
ATOM    537  CD2 LEU A  31      14.576   3.797   8.719
ATOM    538  HD21LEU A  31      14.939   4.337   7.845
ATOM    539  HD22LEU A  31      13.852   4.415   9.249
ATOM    540  HD23LEU A  31      14.073   2.887   8.399
ATOM    541  C   LEU A  31      17.437   0.570   7.550
ATOM    542  O   LEU A  31      17.223   0.654   6.344
ATOM    543  N   ILE A  32      18.428  -0.198   8.023
ATOM    544  H   ILE A  32      18.621  -0.193   9.024
ATOM    545  CA  ILE A  32      19.231  -1.073   7.159
ATOM    546  HA  ILE A  32      19.634  -0.466   6.345
ATOM    547  CB  ILE A  32      20.429  -1.674   7.931
ATOM    548  HB  ILE A  32      20.095  -2.022   8.908
ATOM    549  CG2 ILE A  32      21.055  -2.861   7.175
ATOM    550  HG21ILE A  32      21.951  -3.212   7.684
ATOM    551  HG22ILE A  32      21.315  -2.553   6.162
ATOM    552  HG23ILE A  32      20.361  -3.699   7.133
ATOM    553  CG1 ILE A  32      21.489  -0.571   8.111
ATOM    554  HG12ILE A  32      21.905  -0.362   7.130
ATOM    555  HG13ILE A  32      21.022   0.343   8.476
ATOM    556  CD1 ILE A  32      22.638  -0.922   9.062
ATOM    557  HD11ILE A  32      23.280  -1.673   8.609
ATOM    558  HD12ILE A  32      22.243  -1.291  10.009
ATOM    559  HD13ILE A  32      23.236  -0.030   9.247
ATOM    560  C   ILE A  32      18.356  -2.141   6.491
ATOM    561  O   ILE A  32      18.333  -2.200   5.265
ATOM    562  N   ARG A  33      17.607  -2.961   7.248
ATOM    563  H   ARG A  33      17.651  -2.857   8.263
ATOM    564  CA  ARG A  33      16.707  -3.988   6.684
ATOM    565  HA  ARG A  33      17.304  -4.719   6.139
ATOM    566  CB  ARG A  33      16.000  -4.714   7.844
ATOM    567  HB2 ARG A  33      16.737  -5.331   8.362
ATOM    568  HB3 ARG A  33      15.648  -3.968   8.558
ATOM    569  CG  ARG A  33      14.794  -5.596   7.474
ATOM    570  HG2 ARG A  33      14.450  -6.055   8.398
ATOM    571  HG3 ARG A  33      13.997  -4.968   7.079
ATOM    572  CD  ARG A  33      15.060  -6.716   6.468
ATOM    573  HD2 ARG A  33      15.281  -6.283   5.495
ATOM    574  HD3 ARG A  33      15.929  -7.285   6.804
ATOM    575  NE  ARG A  33      13.896  -7.619   6.349
ATOM    576  HE  ARG A  33      12.985  -7.301   6.662
ATOM    577  CZ  ARG A  33      13.969  -8.905   6.038
ATOM    578  NH1 ARG A  33      15.032  -9.439   5.491
ATOM    579  HH11ARG A  33      15.073 -10.442   5.351
ATOM    580  HH12ARG A  33      15.716  -8.815   5.046
ATOM    581  NH2 ARG A  33      12.943  -9.670   6.291
ATOM    582  HH21ARG A  33      12.925 -10.666   6.091
ATOM    583  HH22ARG A  33      12.071  -9.210   6.585
ATOM    584  C   ARG A  33      15.733  -3.383   5.664
ATOM    585  O   ARG A  33      15.506  -3.978   4.605
ATOM    586  N   LEU A  34      15.218  -2.185   5.955
ATOM    587  H   LEU A  34      15.419  -1.793   6.873
ATOM    588  CA  LEU A  34      14.395  -1.414   5.038
ATOM    589  HA  LEU A  34      13.546  -2.039   4.759
ATOM    590  CB  LEU A  34      13.880  -0.189   5.811
ATOM    591  HB2 LEU A  34      13.459  -0.519   6.763
ATOM    592  HB3 LEU A  34      14.717   0.470   6.029
ATOM    593  CG  LEU A  34      12.814   0.620   5.066
ATOM    594  HG  LEU A  34      13.207   0.917   4.101
ATOM    595  CD1 LEU A  34      11.549  -0.207   4.851
ATOM    596  HD11LEU A  34      11.727  -0.955   4.081
ATOM    597  HD12LEU A  34      10.731   0.435   4.536
ATOM    598  HD13LEU A  34      11.276  -0.701   5.780
ATOM    599  CD2 LEU A  34      12.486   1.871   5.877
ATOM    600  HD21LEU A  34      11.708   2.449   5.382
ATOM    601  HD22LEU A  34      13.377   2.493   5.957
ATOM    602  HD23LEU A  34      12.157   1.591   6.874
ATOM    603  C   LEU A  34      15.161  -1.044   3.749
ATOM    604  O   LEU A  34      14.752  -1.458   2.662
ATOM    605  N   PHE A  35      16.292  -0.334   3.856
ATOM    606  H   PHE A  35      16.595  -0.043   4.784
ATOM    607  CA  PHE A  35      17.079   0.138   2.708
ATOM    608  HA  PHE A  35      16.424   0.698   2.037
ATOM    609  CB  PHE A  35      18.193   1.078   3.194
ATOM    610  HB2 PHE A  35      18.808   0.538   3.917
ATOM    611  HB3 PHE A  35      18.832   1.309   2.342
ATOM    612  CG  PHE A  35      17.782   2.394   3.835
ATOM    613  CD1 PHE A  35      16.434   2.792   3.952
ATOM    614  HD1 PHE A  35      15.629   2.179   3.579
ATOM    615  CE1 PHE A  35      16.108   3.990   4.601
ATOM    616  HE1 PHE A  35      15.073   4.244   4.738
ATOM    617  CZ  PHE A  35      17.118   4.843   5.072
ATOM    618  HZ  PHE A  35      16.858   5.776   5.553
ATOM    619  CE2 PHE A  35      18.463   4.464   4.936
ATOM    620  HE2 PHE A  35      19.247   5.107   5.299
ATOM    621  CD2 PHE A  35      18.789   3.230   4.352
ATOM    622  HD2 PHE A  35      19.821   2.922   4.301
ATOM    623  C   PHE A  35      17.683  -0.999   1.876
ATOM    624  O   PHE A  35      17.766  -0.879   0.651
ATOM    625  N   LYS A  36      18.044  -2.127   2.509
ATOM    626  H   LYS A  36      18.017  -2.122   3.529
ATOM    627  CA  LYS A  36      18.460  -3.366   1.836
ATOM    628  HA  LYS A  36      19.323  -3.158   1.202
ATOM    629  CB  LYS A  36      18.851  -4.442   2.869
ATOM    630  HB2 LYS A  36      18.072  -4.508   3.629
ATOM    631  HB3 LYS A  36      18.899  -5.406   2.361
ATOM    632  CG  LYS A  36      20.210  -4.204   3.544
ATOM    633  HG2 LYS A  36      20.992  -4.172   2.789
ATOM    634  HG3 LYS A  36      20.208  -3.240   4.045
ATOM    635  CD  LYS A  36      20.521  -5.302   4.577
ATOM    636  HD2 LYS A  36      21.349  -4.976   5.203
ATOM    637  HD3 LYS A  36      19.654  -5.431   5.227
ATOM    638  CE  LYS A  36      20.881  -6.658   3.955
ATOM    639  HE2 LYS A  36      20.884  -7.417   4.744
ATOM    640  HE3 LYS A  36      20.119  -6.942   3.226
ATOM    641  NZ  LYS A  36      22.213  -6.617   3.311
ATOM    642  HZ1 LYS A  36      22.411  -7.496   2.835
ATOM    643  HZ2 LYS A  36      22.935  -6.427   4.012
ATOM    644  HZ3 LYS A  36      22.251  -5.887   2.597
ATOM    645  C   LYS A  36      17.374  -3.948   0.932
ATOM    646  O   LYS A  36      17.716  -4.657  -0.016
ATOM    647  N   SER A  37      16.089  -3.679   1.178
ATOM    648  H   SER A  37      15.876  -3.045   1.941
ATOM    649  CA  SER A  37      14.993  -4.517   0.654
ATOM    650  HA  SER A  37      15.393  -5.276  -0.018
ATOM    651  CB  SER A  37      14.310  -5.260   1.816
ATOM    652  HB2 SER A  37      13.619  -4.584   2.320
ATOM    653  HB3 SER A  37      13.744  -6.103   1.417
ATOM    654  OG  SER A  37      15.253  -5.723   2.775
ATOM    655  HG  SER A  37      15.353  -5.005   3.461
ATOM    656  C   SER A  37      13.958  -3.715  -0.145
ATOM    657  O   SER A  37      13.391  -4.221  -1.121
ATOM    658  N   HID A  38      13.755  -2.452   0.246
ATOM    659  H   HID A  38      14.242  -2.128   1.079
ATOM    660  CA  HID A  38      12.771  -1.541  -0.323
ATOM    661  HA  HID A  38      12.518  -1.872  -1.326
ATOM    662  CB  HID A  38      11.480  -1.604   0.514
ATOM    663  HB2 HID A  38      11.679  -1.222   1.516
ATOM    664  HB3 HID A  38      10.744  -0.955   0.044
ATOM    665  CG  HID A  38      10.883  -2.988   0.633
ATOM    666  ND1 HID A  38      10.197  -3.678  -0.342
ATOM    667  HD1 HID A  38       9.951  -3.332  -1.276
ATOM    668  CE1 HID A  38       9.855  -4.877   0.162
ATOM    669  HE1 HID A  38       9.299  -5.634  -0.377
ATOM    670  NE2 HID A  38      10.285  -5.004   1.432
ATOM    671  CD2 HID A  38      10.934  -3.801   1.735
ATOM    672  HD2 HID A  38      11.405  -3.557   2.676
ATOM    673  C   HID A  38      13.345  -0.112  -0.449
ATOM    674  O   HID A  38      12.824   0.817   0.181
ATOM    675  N   PRO A  39      14.403   0.119  -1.263
ATOM    676  CD  PRO A  39      15.158  -0.879  -2.011
ATOM    677  HD2 PRO A  39      14.504  -1.558  -2.550
ATOM    678  HD3 PRO A  39      15.796  -1.437  -1.327
ATOM    679  CG  PRO A  39      16.026  -0.107  -3.001
ATOM    680  HG2 PRO A  39      15.455   0.097  -3.908
ATOM    681  HG3 PRO A  39      16.948  -0.638  -3.233
ATOM    682  CB  PRO A  39      16.300   1.193  -2.256
ATOM    683  HB2 PRO A  39      16.562   2.002  -2.939
ATOM    684  HB3 PRO A  39      17.106   1.034  -1.538
ATOM    685  CA  PRO A  39      14.990   1.445  -1.500
ATOM    686  HA  PRO A  39      15.233   1.883  -0.534
ATOM    687  C   PRO A  39      14.069   2.444  -2.235
ATOM    688  O   PRO A  39      14.475   3.566  -2.542
ATOM    689  N   GLU A  40      12.805   2.098  -2.481
ATOM    690  H   GLU A  40      12.545   1.144  -2.294
ATOM    691  CA  GLU A  40      11.717   3.070  -2.669
ATOM    692  HA  GLU A  40      11.969   3.734  -3.494
ATOM    693  CB  GLU A  40      10.367   2.390  -3.001
ATOM    694  HB2 GLU A  40       9.597   2.864  -2.402
ATOM    695  HB3 GLU A  40      10.115   2.588  -4.040
ATOM    696  CG  GLU A  40      10.246   0.878  -2.767
ATOM    697  HG2 GLU A  40      10.512   0.660  -1.732
ATOM    698  HG3 GLU A  40       9.202   0.593  -2.911
ATOM    699  CD  GLU A  40      11.110   0.030  -3.711
ATOM    700  OE1 GLU A  40      11.314  -1.164  -3.376
ATOM    701  OE2 GLU A  40      11.607   0.548  -4.746
ATOM    702  C   GLU A  40      11.526   3.992  -1.467
ATOM    703  O   GLU A  40      11.143   5.147  -1.611
ATOM    704  N   THR A  41      11.868   3.496  -0.282
ATOM    705  H   THR A  41      12.157   2.529  -0.237
ATOM    706  CA  THR A  41      11.979   4.326   0.920
ATOM    707  HA  THR A  41      11.112   4.974   0.931
ATOM    708  CB  THR A  41      11.973   3.474   2.198
ATOM    709  HB  THR A  41      12.067   4.131   3.057
ATOM    710  CG2 THR A  41      10.669   2.689   2.323
ATOM    711  HG21THR A  41      10.642   1.864   1.612
ATOM    712  HG22THR A  41       9.838   3.361   2.124
ATOM    713  HG23THR A  41      10.570   2.308   3.335
ATOM    714  OG1 THR A  41      13.048   2.562   2.214
ATOM    715  HG1 THR A  41      12.837   1.834   1.606
ATOM    716  C   THR A  41      13.240   5.199   0.906
ATOM    717  O   THR A  41      13.180   6.411   1.107
ATOM    718  N   LEU A  42      14.391   4.605   0.573
ATOM    719  H   LEU A  42      14.379   3.604   0.473
ATOM    720  CA  LEU A  42      15.675   5.291   0.430
ATOM    721  HA  LEU A  42      15.927   5.718   1.397
ATOM    722  CB  LEU A  42      16.726   4.233   0.075
ATOM    723  HB2 LEU A  42      16.669   3.423   0.805
ATOM    724  HB3 LEU A  42      16.496   3.832  -0.910
ATOM    725  CG  LEU A  42      18.162   4.764   0.040
ATOM    726  HG  LEU A  42      18.259   5.482  -0.773
ATOM    727  CD1 LEU A  42      18.556   5.426   1.361
ATOM    728  HD11LEU A  42      18.077   6.400   1.443
ATOM    729  HD12LEU A  42      19.636   5.552   1.406
ATOM    730  HD13LEU A  42      18.241   4.799   2.190
ATOM    731  CD2 LEU A  42      19.111   3.596  -0.228
ATOM    732  HD21LEU A  42      20.137   3.961  -0.258
ATOM    733  HD22LEU A  42      18.874   3.139  -1.190
ATOM    734  HD23LEU A  42      19.024   2.848   0.558
ATOM    735  C   LEU A  42      15.636   6.439  -0.598
ATOM    736  O   LEU A  42      16.258   7.479  -0.389
ATOM    737  N   GLU A  43      14.857   6.268  -1.671
ATOM    738  H   GLU A  43      14.497   5.329  -1.818
ATOM    739  CA  GLU A  43      14.460   7.308  -2.634
ATOM    740  HA  GLU A  43      15.362   7.678  -3.112
ATOM    741  CB  GLU A  43      13.572   6.670  -3.727
ATOM    742  HB2 GLU A  43      14.236   6.173  -4.435
ATOM    743  HB3 GLU A  43      12.955   5.897  -3.274
ATOM    744  CG  GLU A  43      12.623   7.587  -4.502
ATOM    745  HG2 GLU A  43      12.134   7.003  -5.282
ATOM    746  HG3 GLU A  43      11.846   7.942  -3.822
ATOM    747  CD  GLU A  43      13.328   8.774  -5.150
ATOM    748  OE1 GLU A  43      14.429   8.599  -5.727
ATOM    749  OE2 GLU A  43      12.765   9.907  -5.116
ATOM    750  C   GLU A  43      13.823   8.517  -1.953
ATOM    751  O   GLU A  43      14.278   9.638  -2.177
ATOM    752  N   LYS A  44      12.833   8.317  -1.084
ATOM    753  H   LYS A  44      12.557   7.363  -0.892
ATOM    754  CA  LYS A  44      12.225   9.400  -0.292
ATOM    755  HA  LYS A  44      11.865  10.171  -0.972
ATOM    756  CB  LYS A  44      11.046   8.878   0.544
ATOM    757  HB2 LYS A  44      11.425   8.187   1.292
ATOM    758  HB3 LYS A  44      10.595   9.714   1.079
ATOM    759  CG  LYS A  44       9.962   8.170  -0.272
ATOM    760  HG2 LYS A  44      10.410   7.426  -0.926
ATOM    761  HG3 LYS A  44       9.291   7.650   0.409
ATOM    762  CD  LYS A  44       9.155   9.162  -1.105
ATOM    763  HD2 LYS A  44       8.629   9.855  -0.448
ATOM    764  HD3 LYS A  44       9.809   9.721  -1.771
ATOM    765  CE  LYS A  44       8.164   8.359  -1.931
ATOM    766  HE2 LYS A  44       8.712   7.792  -2.683
ATOM    767  HE3 LYS A  44       7.634   7.662  -1.281
ATOM    768  NZ  LYS A  44       7.187   9.230  -2.583
ATOM    769  HZ1 LYS A  44       6.625   9.696  -1.877
ATOM    770  HZ2 LYS A  44       6.564   8.666  -3.145
ATOM    771  HZ3 LYS A  44       7.641   9.924  -3.170
ATOM    772  C   LYS A  44      13.227  10.055   0.666
ATOM    773  O   LYS A  44      13.214  11.273   0.852
ATOM    774  N   PHE A  45      14.119   9.260   1.257
ATOM    775  H   PHE A  45      14.042   8.261   1.090
ATOM    776  CA  PHE A  45      15.225   9.742   2.075
ATOM    777  HA  PHE A  45      14.829  10.520   2.729
ATOM    778  CB  PHE A  45      15.756   8.632   2.985
ATOM    779  HB2 PHE A  45      16.150   7.821   2.372
ATOM    780  HB3 PHE A  45      16.580   9.055   3.553
ATOM    781  CG  PHE A  45      14.743   8.087   3.973
ATOM    782  CD1 PHE A  45      14.359   6.736   3.917
ATOM    783  HD1 PHE A  45      14.796   6.079   3.185
ATOM    784  CE1 PHE A  45      13.390   6.235   4.800
ATOM    785  HE1 PHE A  45      13.070   5.206   4.739
ATOM    786  CZ  PHE A  45      12.806   7.079   5.750
ATOM    787  HZ  PHE A  45      12.036   6.688   6.399
ATOM    788  CE2 PHE A  45      13.195   8.426   5.825
ATOM    789  HE2 PHE A  45      12.720   9.077   6.542
ATOM    790  CD2 PHE A  45      14.169   8.929   4.945
ATOM    791  HD2 PHE A  45      14.453   9.969   5.003
ATOM    792  C   PHE A  45      16.340  10.402   1.242
ATOM    793  O   PHE A  45      17.473   9.922   1.158
ATOM    794  N   ASP A  46      16.068  11.592   0.700
ATOM    795  H   ASP A  46      15.096  11.895   0.743
ATOM    796  CA  ASP A  46      17.076  12.517   0.148
ATOM    797  HA  ASP A  46      17.556  12.002  -0.680
ATOM    798  CB  ASP A  46      16.333  13.731  -0.444
ATOM    799  HB2 ASP A  46      15.385  13.386  -0.863
ATOM    800  HB3 ASP A  46      16.093  14.442   0.341
ATOM    801  CG  ASP A  46      17.106  14.425  -1.568
ATOM    802  OD1 ASP A  46      16.674  14.317  -2.748
ATOM    803  OD2 ASP A  46      18.178  15.019  -1.308
ATOM    804  C   ASP A  46      18.199  12.885   1.159
ATOM    805  O   ASP A  46      19.298  13.304   0.790
ATOM    806  N   ARG A  47      17.979  12.623   2.444
ATOM    807  H   ARG A  47      17.028  12.406   2.692
ATOM    808  CA  ARG A  47      18.978  12.610   3.524
ATOM    809  HA  ARG A  47      19.575  13.514   3.478
ATOM    810  CB  ARG A  47      18.171  12.637   4.827
ATOM    811  HB2 ARG A  47      17.487  13.488   4.783
ATOM    812  HB3 ARG A  47      17.575  11.725   4.892
ATOM    813  CG  ARG A  47      19.009  12.769   6.102
ATOM    814  HG2 ARG A  47      19.605  11.870   6.249
ATOM    815  HG3 ARG A  47      19.663  13.641   6.041
ATOM    816  CD  ARG A  47      18.029  12.939   7.261
ATOM    817  HD2 ARG A  47      17.602  13.943   7.216
ATOM    818  HD3 ARG A  47      17.231  12.202   7.158
ATOM    819  NE  ARG A  47      18.672  12.738   8.556
ATOM    820  HE  ARG A  47      19.663  12.520   8.551
ATOM    821  CZ  ARG A  47      18.075  12.737   9.726
ATOM    822  NH1 ARG A  47      16.807  12.969   9.872
ATOM    823  HH11ARG A  47      16.350  12.919  10.762
ATOM    824  HH12ARG A  47      16.258  13.212   9.047
ATOM    825  NH2 ARG A  47      18.762  12.480  10.793
ATOM    826  HH21ARG A  47      18.322  12.520  11.693
ATOM    827  HH22ARG A  47      19.763  12.360  10.688
ATOM    828  C   ARG A  47      19.977  11.427   3.493
ATOM    829  O   ARG A  47      21.098  11.559   3.995
ATOM    830  N   PHE A  48      19.615  10.300   2.869
ATOM    831  H   PHE A  48      18.700  10.289   2.434
ATOM    832  CA  PHE A  48      20.304   9.005   2.994
ATOM    833  HA  PHE A  48      21.284   9.175   3.434
ATOM    834  CB  PHE A  48      19.526   8.093   3.957
ATOM    835  HB2 PHE A  48      18.523   7.934   3.569
ATOM    836  HB3 PHE A  48      20.009   7.119   3.982
ATOM    837  CG  PHE A  48      19.460   8.601   5.384
ATOM    838  CD1 PHE A  48      20.654   8.851   6.085
ATOM    839  HD1 PHE A  48      21.613   8.667   5.625
ATOM    840  CE1 PHE A  48      20.608   9.339   7.398
ATOM    841  HE1 PHE A  48      21.527   9.533   7.932
ATOM    842  CZ  PHE A  48      19.373   9.577   8.020
ATOM    843  HZ  PHE A  48      19.352   9.956   9.028
ATOM    844  CE2 PHE A  48      18.176   9.310   7.336
ATOM    845  HE2 PHE A  48      17.225   9.479   7.818
ATOM    846  CD2 PHE A  48      18.221   8.811   6.023
ATOM    847  HD2 PHE A  48      17.296   8.576   5.524
ATOM    848  C   PHE A  48      20.572   8.258   1.681
ATOM    849  O   PHE A  48      21.408   7.362   1.694
ATOM    850  N   LYS A  49      19.960   8.631   0.546
ATOM    851  H   LYS A  49      19.189   9.291   0.628
ATOM    852  CA  LYS A  49      20.155   7.992  -0.777
ATOM    853  HA  LYS A  49      19.734   6.993  -0.703
ATOM    854  CB  LYS A  49      19.328   8.736  -1.845
ATOM    855  HB2 LYS A  49      19.496   8.271  -2.819
ATOM    856  HB3 LYS A  49      18.272   8.621  -1.598
ATOM    857  CG  LYS A  49      19.655  10.238  -1.939
ATOM    858  HG2 LYS A  49      19.412  10.719  -0.992
ATOM    859  HG3 LYS A  49      20.724  10.357  -2.107
ATOM    860  CD  LYS A  49      18.910  10.982  -3.058
ATOM    861  HD2 LYS A  49      19.108  12.047  -2.933
ATOM    862  HD3 LYS A  49      19.315  10.672  -4.023
ATOM    863  CE  LYS A  49      17.392  10.757  -3.060
ATOM    864  HE2 LYS A  49      17.190   9.771  -3.487
ATOM    865  HE3 LYS A  49      17.006  10.757  -2.038
ATOM    866  NZ  LYS A  49      16.701  11.793  -3.859
ATOM    867  HZ1 LYS A  49      16.773  12.721  -3.436
ATOM    868  HZ2 LYS A  49      15.706  11.583  -3.933
ATOM    869  HZ3 LYS A  49      17.067  11.813  -4.808
ATOM    870  C   LYS A  49      21.609   7.750  -1.229
ATOM    871  O   LYS A  49      21.848   6.887  -2.077
ATOM    872  N   HID A  50      22.580   8.453  -0.634
ATOM    873  H   HID A  50      22.278   9.105   0.069
ATOM    874  CA  HID A  50      24.030   8.245  -0.755
ATOM    875  HA  HID A  50      24.291   8.263  -1.812
ATOM    876  CB  HID A  50      24.738   9.429  -0.079
ATOM    877  HB2 HID A  50      25.792   9.406  -0.363
ATOM    878  HB3 HID A  50      24.321  10.362  -0.460
ATOM    879  CG  HID A  50      24.652   9.415   1.432
ATOM    880  ND1 HID A  50      23.691  10.010   2.224
ATOM    881  HD1 HID A  50      22.884  10.537   1.919
ATOM    882  CE1 HID A  50      23.985   9.727   3.506
ATOM    883  HE1 HID A  50      23.404  10.051   4.359
ATOM    884  NE2 HID A  50      25.096   8.976   3.588
ATOM    885  CD2 HID A  50      25.529   8.782   2.274
ATOM    886  HD2 HID A  50      26.399   8.216   1.971
ATOM    887  C   HID A  50      24.549   6.910  -0.166
ATOM    888  O   HID A  50      25.699   6.534  -0.416
ATOM    889  N   LEU A  51      23.724   6.210   0.624
ATOM    890  H   LEU A  51      22.831   6.633   0.870
ATOM    891  CA  LEU A  51      24.002   4.914   1.239
ATOM    892  HA  LEU A  51      25.045   4.899   1.557
ATOM    893  CB  LEU A  51      23.111   4.727   2.478
ATOM    894  HB2 LEU A  51      22.067   4.873   2.197
ATOM    895  HB3 LEU A  51      23.217   3.701   2.821
ATOM    896  CG  LEU A  51      23.474   5.677   3.635
ATOM    897  HG  LEU A  51      23.396   6.711   3.307
ATOM    898  CD1 LEU A  51      22.528   5.484   4.819
ATOM    899  HD11LEU A  51      22.707   4.522   5.289
ATOM    900  HD12LEU A  51      21.498   5.532   4.475
ATOM    901  HD13LEU A  51      22.693   6.272   5.555
ATOM    902  CD2 LEU A  51      24.901   5.410   4.115
ATOM    903  HD21LEU A  51      25.048   5.852   5.093
ATOM    904  HD22LEU A  51      25.621   5.852   3.426
ATOM    905  HD23LEU A  51      25.066   4.338   4.185
ATOM    906  C   LEU A  51      23.845   3.777   0.227
ATOM    907  O   LEU A  51      22.801   3.127   0.110
ATOM    908  N   LYS A  52      24.910   3.566  -0.548
ATOM    909  H   LYS A  52      25.706   4.185  -0.448
ATOM    910  CA  LYS A  52      24.954   2.548  -1.597
ATOM    911  HA  LYS A  52      23.994   2.523  -2.111
ATOM    912  CB  LYS A  52      26.019   2.909  -2.640
ATOM    913  HB2 LYS A  52      27.004   2.698  -2.226
ATOM    914  HB3 LYS A  52      25.882   2.275  -3.516
ATOM    915  CG  LYS A  52      25.996   4.380  -3.088
ATOM    916  HG2 LYS A  52      26.384   4.997  -2.282
ATOM    917  HG3 LYS A  52      26.669   4.483  -3.926
ATOM    918  CD  LYS A  52      24.631   4.917  -3.520
ATOM    919  HD2 LYS A  52      24.253   4.309  -4.343
ATOM    920  HD3 LYS A  52      23.932   4.881  -2.687
ATOM    921  CE  LYS A  52      24.789   6.367  -3.976
ATOM    922  HE2 LYS A  52      25.276   6.940  -3.183
ATOM    923  HE3 LYS A  52      25.443   6.386  -4.849
ATOM    924  NZ  LYS A  52      23.478   6.962  -4.309
ATOM    925  HZ1 LYS A  52      23.581   7.871  -4.761
ATOM    926  HZ2 LYS A  52      22.904   7.055  -3.474
ATOM    927  HZ3 LYS A  52      22.948   6.341  -4.926
ATOM    928  C   LYS A  52      25.192   1.146  -1.036
ATOM    929  O   LYS A  52      24.842   0.169  -1.702
ATOM    930  N   THR A  53      25.752   1.023   0.171
ATOM    931  H   THR A  53      26.063   1.864   0.641
ATOM    932  CA  THR A  53      26.145  -0.271   0.745
ATOM    933  HA  THR A  53      25.551  -1.062   0.290
ATOM    934  CB  THR A  53      27.620  -0.572   0.455
ATOM    935  HB  THR A  53      27.862  -1.532   0.911
ATOM    936  CG2 THR A  53      27.946  -0.682  -1.031
ATOM    937  HG21THR A  53      28.986  -0.969  -1.132
ATOM    938  HG22THR A  53      27.789   0.269  -1.539
ATOM    939  HG23THR A  53      27.324  -1.451  -1.491
ATOM    940  OG1 THR A  53      28.461   0.401   1.034
ATOM    941  HG1 THR A  53      28.222   1.314   0.695
ATOM    942  C   THR A  53      25.929  -0.352   2.253
ATOM    943  O   THR A  53      25.960   0.653   2.966
ATOM    944  N   GLU A  54      25.757  -1.580   2.753
ATOM    945  H   GLU A  54      25.764  -2.373   2.113
ATOM    946  CA  GLU A  54      25.473  -1.828   4.168
ATOM    947  HA  GLU A  54      24.565  -1.280   4.421
ATOM    948  CB  GLU A  54      25.215  -3.329   4.388
ATOM    949  HB2 GLU A  54      24.876  -3.795   3.461
ATOM    950  HB3 GLU A  54      26.138  -3.818   4.701
ATOM    951  CG  GLU A  54      24.122  -3.532   5.442
ATOM    952  HG2 GLU A  54      24.270  -2.818   6.256
ATOM    953  HG3 GLU A  54      23.153  -3.333   4.984
ATOM    954  CD  GLU A  54      24.141  -4.947   6.019
ATOM    955  OE1 GLU A  54      24.083  -5.954   5.262
ATOM    956  OE2 GLU A  54      24.280  -5.081   7.260
ATOM    957  C   GLU A  54      26.597  -1.316   5.087
ATOM    958  O   GLU A  54      26.321  -0.695   6.112
ATOM    959  N   ALA A  55      27.862  -1.482   4.676
ATOM    960  H   ALA A  55      28.013  -1.989   3.816
ATOM    961  CA  ALA A  55      29.051  -0.978   5.379
ATOM    962  HA  ALA A  55      29.042  -1.378   6.394
ATOM    963  CB  ALA A  55      30.289  -1.523   4.661
ATOM    964  HB1 ALA A  55      31.187  -1.218   5.196
ATOM    965  HB2 ALA A  55      30.335  -1.130   3.645
ATOM    966  HB3 ALA A  55      30.253  -2.614   4.631
ATOM    967  C   ALA A  55      29.126   0.561   5.498
ATOM    968  O   ALA A  55      29.865   1.079   6.344
ATOM    969  N   GLU A  56      28.349   1.293   4.684
ATOM    970  H   GLU A  56      27.786   0.809   3.990
ATOM    971  CA  GLU A  56      28.154   2.740   4.819
ATOM    972  HA  GLU A  56      29.041   3.196   5.260
ATOM    973  CB  GLU A  56      27.905   3.385   3.447
ATOM    974  HB2 GLU A  56      27.021   2.945   2.990
ATOM    975  HB3 GLU A  56      27.713   4.449   3.589
ATOM    976  CG  GLU A  56      29.090   3.246   2.489
ATOM    977  HG2 GLU A  56      29.914   3.867   2.844
ATOM    978  HG3 GLU A  56      29.455   2.221   2.480
ATOM    979  CD  GLU A  56      28.685   3.655   1.071
ATOM    980  OE1 GLU A  56      28.171   2.785   0.315
ATOM    981  OE2 GLU A  56      28.980   4.824   0.686
ATOM    982  C   GLU A  56      26.956   3.048   5.725
ATOM    983  O   GLU A  56      26.994   4.024   6.474
ATOM    984  N   MET A  57      25.904   2.219   5.691
ATOM    985  H   MET A  57      25.943   1.423   5.061
ATOM    986  CA  MET A  57      24.713   2.371   6.538
ATOM    987  HA  MET A  57      24.355   3.398   6.466
ATOM    988  CB  MET A  57      23.595   1.423   6.084
ATOM    989  HB2 MET A  57      23.929   0.395   6.221
ATOM    990  HB3 MET A  57      22.734   1.605   6.727
ATOM    991  CG  MET A  57      23.127   1.592   4.636
ATOM    992  HG2 MET A  57      22.542   2.505   4.562
ATOM    993  HG3 MET A  57      23.991   1.685   3.983
ATOM    994  SD  MET A  57      22.104   0.225   4.029
ATOM    995  CE  MET A  57      21.938   0.729   2.295
ATOM    996  HE1 MET A  57      22.923   0.767   1.828
ATOM    997  HE2 MET A  57      21.476   1.716   2.241
ATOM    998  HE3 MET A  57      21.317   0.010   1.761
ATOM    999  C   MET A  57      25.036   2.087   8.012
ATOM   1000  O   MET A  57      24.583   2.821   8.894
ATOM   1001  N   LYS A  58      25.879   1.073   8.271
ATOM   1002  H   LYS A  58      26.139   0.475   7.483
ATOM   1003  CA  LYS A  58      26.483   0.777   9.581
ATOM   1004  HA  LYS A  58      25.694   0.623  10.317
ATOM   1005  CB  LYS A  58      27.319  -0.513   9.487
ATOM   1006  HB2 LYS A  58      28.069  -0.379   8.705
ATOM   1007  HB3 LYS A  58      27.851  -0.668  10.427
ATOM   1008  CG  LYS A  58      26.515  -1.786   9.162
ATOM   1009  HG2 LYS A  58      25.784  -1.578   8.384
ATOM   1010  HG3 LYS A  58      27.215  -2.526   8.770
ATOM   1011  CD  LYS A  58      25.782  -2.414  10.356
ATOM   1012  HD2 LYS A  58      26.514  -2.681  11.119
ATOM   1013  HD3 LYS A  58      25.058  -1.716  10.777
ATOM   1014  CE  LYS A  58      25.068  -3.670   9.833
ATOM   1015  HE2 LYS A  58      24.164  -3.384   9.291
ATOM   1016  HE3 LYS A  58      25.730  -4.158   9.116
ATOM   1017  NZ  LYS A  58      24.740  -4.647  10.889
ATOM   1018  HZ1 LYS A  58      24.126  -4.269  11.610
ATOM   1019  HZ2 LYS A  58      25.587  -4.935  11.383
ATOM   1020  HZ3 LYS A  58      24.348  -5.495  10.492
ATOM   1021  C   LYS A  58      27.354   1.941  10.078
ATOM   1022  O   LYS A  58      27.355   2.251  11.270
ATOM   1023  N   ALA A  59      28.047   2.636   9.173
ATOM   1024  H   ALA A  59      28.017   2.343   8.209
ATOM   1025  CA  ALA A  59      28.824   3.828   9.505
ATOM   1026  HA  ALA A  59      29.327   3.665  10.460
ATOM   1027  CB  ALA A  59      29.908   4.013   8.442
ATOM   1028  HB1 ALA A  59      29.467   4.102   7.451
ATOM   1029  HB2 ALA A  59      30.579   3.156   8.463
ATOM   1030  HB3 ALA A  59      30.480   4.912   8.664
ATOM   1031  C   ALA A  59      27.971   5.101   9.662
ATOM   1032  O   ALA A  59      28.428   6.036  10.316
ATOM   1033  N   SER A  60      26.745   5.149   9.121
ATOM   1034  H   SER A  60      26.434   4.355   8.576
ATOM   1035  CA  SER A  60      25.858   6.315   9.192
ATOM   1036  HA  SER A  60      26.436   7.178   8.858
ATOM   1037  CB  SER A  60      24.683   6.179   8.224
ATOM   1038  HB2 SER A  60      25.064   6.002   7.221
ATOM   1039  HB3 SER A  60      24.061   5.334   8.516
ATOM   1040  OG  SER A  60      23.909   7.366   8.234
ATOM   1041  HG  SER A  60      24.405   8.113   7.782
ATOM   1042  C   SER A  60      25.378   6.604  10.618
ATOM   1043  O   SER A  60      24.351   6.095  11.077
ATOM   1044  N   GLU A  61      26.135   7.472  11.293
ATOM   1045  H   GLU A  61      27.000   7.779  10.850
ATOM   1046  CA  GLU A  61      25.799   8.086  12.573
ATOM   1047  HA  GLU A  61      25.813   7.324  13.351
ATOM   1048  CB  GLU A  61      26.879   9.148  12.850
ATOM   1049  HB2 GLU A  61      27.853   8.664  12.897
ATOM   1050  HB3 GLU A  61      26.902   9.860  12.025
ATOM   1051  CG  GLU A  61      26.656   9.946  14.132
ATOM   1052  HG2 GLU A  61      27.441  10.696  14.221
ATOM   1053  HG3 GLU A  61      25.709  10.484  14.068
ATOM   1054  CD  GLU A  61      26.672   9.071  15.378
ATOM   1055  OE1 GLU A  61      27.426   8.064  15.429
ATOM   1056  OE2 GLU A  61      25.978   9.453  16.355
ATOM   1057  C   GLU A  61      24.412   8.735  12.539
ATOM   1058  O   GLU A  61      23.615   8.593  13.468
ATOM   1059  N   ASP A  62      24.131   9.445  11.444
ATOM   1060  H   ASP A  62      24.845   9.527  10.719
ATOM   1061  CA  ASP A  62      22.891  10.175  11.260
ATOM   1062  HA  ASP A  62      22.680  10.720  12.178
ATOM   1063  CB  ASP A  62      23.114  11.202  10.156
ATOM   1064  HB2 ASP A  62      23.935  11.862  10.441
ATOM   1065  HB3 ASP A  62      23.389  10.689   9.232
ATOM   1066  CG  ASP A  62      21.878  12.048   9.910
ATOM   1067  OD1 ASP A  62      21.487  12.889  10.758
ATOM   1068  OD2 ASP A  62      21.325  11.981   8.794
ATOM   1069  C   ASP A  62      21.691   9.261  10.966
ATOM   1070  O   ASP A  62      20.590   9.597  11.398
ATOM   1071  N   LEU A  63      21.872   8.110  10.295
ATOM   1072  H   LEU A  63      22.792   7.884   9.920
ATOM   1073  CA  LEU A  63      20.796   7.125  10.118
ATOM   1074  HA  LEU A  63      19.915   7.654   9.762
ATOM   1075  CB  LEU A  63      21.201   6.061   9.086
ATOM   1076  HB2 LEU A  63      21.514   6.559   8.169
ATOM   1077  HB3 LEU A  63      22.044   5.493   9.480
ATOM   1078  CG  LEU A  63      20.075   5.078   8.726
ATOM   1079  HG  LEU A  63      19.685   4.607   9.626
ATOM   1080  CD1 LEU A  63      18.948   5.817   8.010
ATOM   1081  HD11LEU A  63      18.211   5.106   7.653
ATOM   1082  HD12LEU A  63      19.352   6.377   7.171
ATOM   1083  HD13LEU A  63      18.460   6.510   8.690
ATOM   1084  CD2 LEU A  63      20.607   3.975   7.810
ATOM   1085  HD21LEU A  63      19.807   3.272   7.580
ATOM   1086  HD22LEU A  63      21.414   3.439   8.310
ATOM   1087  HD23LEU A  63      20.981   4.407   6.886
ATOM   1088  C   LEU A  63      20.442   6.455  11.446
ATOM   1089  O   LEU A  63      19.272   6.355  11.804
ATOM   1090  N   LYS A  64      21.461   6.088  12.218
ATOM   1091  H   LYS A  64      22.399   6.188  11.830
ATOM   1092  CA  LYS A  64      21.344   5.688  13.624
ATOM   1093  HA  LYS A  64      20.777   4.759  13.687
ATOM   1094  CB  LYS A  64      22.773   5.437  14.158
ATOM   1095  HB2 LYS A  64      23.042   4.398  13.962
ATOM   1096  HB3 LYS A  64      23.475   6.055  13.599
ATOM   1097  CG  LYS A  64      22.993   5.737  15.647
ATOM   1098  HG2 LYS A  64      22.706   6.763  15.858
ATOM   1099  HG3 LYS A  64      22.382   5.069  16.250
ATOM   1100  CD  LYS A  64      24.473   5.574  16.011
ATOM   1101  HD2 LYS A  64      24.736   4.517  15.966
ATOM   1102  HD3 LYS A  64      25.093   6.111  15.292
ATOM   1103  CE  LYS A  64      24.788   6.106  17.412
ATOM   1104  HE2 LYS A  64      24.197   5.551  18.146
ATOM   1105  HE3 LYS A  64      25.843   5.910  17.618
ATOM   1106  NZ  LYS A  64      24.529   7.559  17.533
ATOM   1107  HZ1 LYS A  64      23.534   7.776  17.472
ATOM   1108  HZ2 LYS A  64      25.048   8.110  16.844
ATOM   1109  HZ3 LYS A  64      24.843   7.902  18.438
ATOM   1110  C   LYS A  64      20.540   6.736  14.407
ATOM   1111  O   LYS A  64      19.514   6.399  15.000
ATOM   1112  N   LYS A  65      20.965   8.007  14.367
ATOM   1113  H   LYS A  65      21.850   8.192  13.893
ATOM   1114  CA  LYS A  65      20.297   9.120  15.054
ATOM   1115  HA  LYS A  65      20.251   8.894  16.119
ATOM   1116  CB  LYS A  65      21.153  10.383  14.871
ATOM   1117  HB2 LYS A  65      22.144  10.201  15.293
ATOM   1118  HB3 LYS A  65      21.258  10.577  13.806
ATOM   1119  CG  LYS A  65      20.548  11.626  15.539
ATOM   1120  HG2 LYS A  65      19.618  11.875  15.031
ATOM   1121  HG3 LYS A  65      20.325  11.397  16.582
ATOM   1122  CD  LYS A  65      21.476  12.852  15.500
ATOM   1123  HD2 LYS A  65      20.980  13.704  15.966
ATOM   1124  HD3 LYS A  65      22.362  12.626  16.085
ATOM   1125  CE  LYS A  65      21.945  13.236  14.097
ATOM   1126  HE2 LYS A  65      22.715  14.006  14.179
ATOM   1127  HE3 LYS A  65      22.417  12.365  13.634
ATOM   1128  NZ  LYS A  65      20.847  13.727  13.239
ATOM   1129  HZ1 LYS A  65      21.054  13.449  12.276
ATOM   1130  HZ2 LYS A  65      20.805  14.748  13.243
ATOM   1131  HZ3 LYS A  65      19.935  13.368  13.511
ATOM   1132  C   LYS A  65      18.839   9.263  14.544
ATOM   1133  O   LYS A  65      17.927   9.425  15.358
ATOM   1134  N   HIE A  66      18.585   9.130  13.235
ATOM   1135  H   HIE A  66      19.374   9.014  12.604
ATOM   1136  CA  HIE A  66      17.238   9.155  12.647
ATOM   1137  HA  HIE A  66      16.782  10.083  12.964
ATOM   1138  CB  HIE A  66      17.288   9.137  11.110
ATOM   1139  HB2 HIE A  66      17.893   9.970  10.766
ATOM   1140  HB3 HIE A  66      17.751   8.214  10.763
ATOM   1141  CG  HIE A  66      15.916   9.259  10.491
ATOM   1142  ND1 HIE A  66      15.010  10.278  10.781
ATOM   1143  CE1 HIE A  66      13.882   9.976  10.112
ATOM   1144  HE1 HIE A  66      12.969  10.555  10.143
ATOM   1145  NE2 HIE A  66      14.040   8.835   9.424
ATOM   1146  HE2 HIE A  66      13.297   8.369   8.907
ATOM   1147  CD2 HIE A  66      15.317   8.367   9.649
ATOM   1148  HD2 HIE A  66      15.745   7.454   9.264
ATOM   1149  C   HIE A  66      16.334   8.020  13.139
ATOM   1150  O   HIE A  66      15.213   8.269  13.582
ATOM   1151  N   GLY A  67      16.848   6.790  13.149
ATOM   1152  H   GLY A  67      17.770   6.658  12.740
ATOM   1153  CA  GLY A  67      16.192   5.624  13.735
ATOM   1154  HA2 GLY A  67      15.372   5.301  13.093
ATOM   1155  HA3 GLY A  67      16.928   4.826  13.798
ATOM   1156  C   GLY A  67      15.639   5.901  15.133
ATOM   1157  O   GLY A  67      14.485   5.580  15.406
ATOM   1158  N   VAL A  68      16.401   6.595  15.988
ATOM   1159  H   VAL A  68      17.352   6.817  15.716
ATOM   1160  CA  VAL A  68      15.886   7.009  17.307
ATOM   1161  HA  VAL A  68      15.457   6.105  17.741
ATOM   1162  CB  VAL A  68      16.971   7.486  18.302
ATOM   1163  HB  VAL A  68      17.325   8.492  18.071
ATOM   1164  CG1 VAL A  68      16.395   7.467  19.728
ATOM   1165  HG11VAL A  68      17.192   7.541  20.468
ATOM   1166  HG12VAL A  68      15.856   6.536  19.893
ATOM   1167  HG13VAL A  68      15.683   8.279  19.856
ATOM   1168  CG2 VAL A  68      18.166   6.528  18.278
ATOM   1169  HG21VAL A  68      18.710   6.634  17.344
ATOM   1170  HG22VAL A  68      17.816   5.502  18.373
ATOM   1171  HG23VAL A  68      18.849   6.755  19.096
ATOM   1172  C   VAL A  68      14.732   8.017  17.219
ATOM   1173  O   VAL A  68      13.790   7.893  17.993
ATOM   1174  N   THR A  69      14.697   8.952  16.266
ATOM   1175  H   THR A  69      15.423   8.957  15.561
ATOM   1176  CA  THR A  69      13.508   9.817  16.061
ATOM   1177  HA  THR A  69      13.307  10.343  16.991
ATOM   1178  CB  THR A  69      13.716  10.862  14.952
ATOM   1179  HB  THR A  69      13.810  10.363  13.992
ATOM   1180  CG2 THR A  69      12.606  11.903  14.851
ATOM   1181  HG21THR A  69      12.870  12.660  14.111
ATOM   1182  HG22THR A  69      12.443  12.378  15.818
ATOM   1183  HG23THR A  69      11.689  11.421  14.526
ATOM   1184  OG1 THR A  69      14.891  11.596  15.149
ATOM   1185  HG1 THR A  69      15.171  11.830  14.236
ATOM   1186  C   THR A  69      12.264   9.008  15.681
ATOM   1187  O   THR A  69      11.213   9.137  16.320
ATOM   1188  N   VAL A  70      12.394   8.135  14.676
ATOM   1189  H   VAL A  70      13.295   8.078  14.205
ATOM   1190  CA  VAL A  70      11.304   7.264  14.202
ATOM   1191  HA  VAL A  70      10.482   7.894  13.860
ATOM   1192  CB  VAL A  70      11.761   6.382  13.020
ATOM   1193  HB  VAL A  70      12.592   5.748  13.334
ATOM   1194  CG1 VAL A  70      10.634   5.481  12.507
ATOM   1195  HG11VAL A  70       9.761   6.080  12.248
ATOM   1196  HG12VAL A  70      10.356   4.749  13.264
ATOM   1197  HG13VAL A  70      10.963   4.941  11.619
ATOM   1198  CG2 VAL A  70      12.237   7.256  11.858
ATOM   1199  HG21VAL A  70      11.463   7.980  11.608
ATOM   1200  HG22VAL A  70      12.449   6.639  10.984
ATOM   1201  HG23VAL A  70      13.146   7.789  12.126
ATOM   1202  C   VAL A  70      10.786   6.388  15.339
ATOM   1203  O   VAL A  70       9.601   6.422  15.668
ATOM   1204  N   LEU A  71      11.683   5.671  16.019
ATOM   1205  H   LEU A  71      12.657   5.706  15.733
ATOM   1206  CA  LEU A  71      11.316   4.796  17.124
ATOM   1207  HA  LEU A  71      10.460   4.205  16.804
ATOM   1208  CB  LEU A  71      12.463   3.819  17.427
ATOM   1209  HB2 LEU A  71      13.348   4.401  17.685
ATOM   1210  HB3 LEU A  71      12.187   3.223  18.297
ATOM   1211  CG  LEU A  71      12.815   2.859  16.268
ATOM   1212  HG  LEU A  71      13.143   3.428  15.402
ATOM   1213  CD1 LEU A  71      13.962   1.954  16.709
ATOM   1214  HD11LEU A  71      13.666   1.365  17.576
ATOM   1215  HD12LEU A  71      14.831   2.563  16.955
ATOM   1216  HD13LEU A  71      14.223   1.283  15.896
ATOM   1217  CD2 LEU A  71      11.669   1.952  15.816
ATOM   1218  HD21LEU A  71      12.001   1.350  14.971
ATOM   1219  HD22LEU A  71      10.820   2.546  15.483
ATOM   1220  HD23LEU A  71      11.370   1.288  16.625
ATOM   1221  C   LEU A  71      10.846   5.561  18.376
ATOM   1222  O   LEU A  71       9.962   5.072  19.057
ATOM   1223  N   THR A  72      11.317   6.768  18.686
ATOM   1224  H   THR A  72      12.076   7.155  18.140
ATOM   1225  CA  THR A  72      10.739   7.553  19.804
ATOM   1226  HA  THR A  72      10.761   6.933  20.701
ATOM   1227  CB  THR A  72      11.544   8.829  20.101
ATOM   1228  HB  THR A  72      11.485   9.483  19.236
ATOM   1229  CG2 THR A  72      11.106   9.585  21.354
ATOM   1230  HG21THR A  72      11.763  10.432  21.555
ATOM   1231  HG22THR A  72      11.112   8.916  22.214
ATOM   1232  HG23THR A  72      10.096   9.972  21.216
ATOM   1233  OG1 THR A  72      12.888   8.505  20.328
ATOM   1234  HG1 THR A  72      13.261   8.305  19.447
ATOM   1235  C   THR A  72       9.277   7.929  19.523
ATOM   1236  O   THR A  72       8.420   7.774  20.396
ATOM   1237  N   ALA A  73       8.970   8.340  18.286
ATOM   1238  H   ALA A  73       9.708   8.368  17.591
ATOM   1239  CA  ALA A  73       7.600   8.614  17.845
ATOM   1240  HA  ALA A  73       7.147   9.314  18.550
ATOM   1241  CB  ALA A  73       7.650   9.297  16.477
ATOM   1242  HB1 ALA A  73       6.636   9.480  16.127
ATOM   1243  HB2 ALA A  73       8.169   8.667  15.754
ATOM   1244  HB3 ALA A  73       8.169  10.252  16.564
ATOM   1245  C   ALA A  73       6.720   7.347  17.805
ATOM   1246  O   ALA A  73       5.634   7.338  18.382
ATOM   1247  N   LEU A  74       7.194   6.253  17.197
ATOM   1248  H   LEU A  74       8.084   6.315  16.712
ATOM   1249  CA  LEU A  74       6.505   4.957  17.230
ATOM   1250  HA  LEU A  74       5.523   5.091  16.779
ATOM   1251  CB  LEU A  74       7.291   3.939  16.385
ATOM   1252  HB2 LEU A  74       7.386   4.315  15.366
ATOM   1253  HB3 LEU A  74       8.290   3.843  16.806
ATOM   1254  CG  LEU A  74       6.645   2.541  16.347
ATOM   1255  HG  LEU A  74       6.553   2.165  17.362
ATOM   1256  CD1 LEU A  74       5.263   2.534  15.689
ATOM   1257  HD11LEU A  74       4.569   3.142  16.267
ATOM   1258  HD12LEU A  74       4.876   1.517  15.665
ATOM   1259  HD13LEU A  74       5.330   2.924  14.673
ATOM   1260  CD2 LEU A  74       7.538   1.572  15.580
ATOM   1261  HD21LEU A  74       7.117   0.571  15.643
ATOM   1262  HD22LEU A  74       8.531   1.558  16.027
ATOM   1263  HD23LEU A  74       7.615   1.878  14.538
ATOM   1264  C   LEU A  74       6.303   4.462  18.676
ATOM   1265  O   LEU A  74       5.211   4.048  19.051
ATOM   1266  N   GLY A  75       7.326   4.584  19.522
ATOM   1267  H   GLY A  75       8.209   4.905  19.144
ATOM   1268  CA  GLY A  75       7.264   4.289  20.952
ATOM   1269  HA2 GLY A  75       7.077   3.222  21.074
ATOM   1270  HA3 GLY A  75       8.209   4.545  21.429
ATOM   1271  C   GLY A  75       6.149   5.063  21.636
ATOM   1272  O   GLY A  75       5.298   4.442  22.261
ATOM   1273  N   ALA A  76       6.090   6.388  21.452
ATOM   1274  H   ALA A  76       6.820   6.841  20.910
ATOM   1275  CA  ALA A  76       4.976   7.204  21.935
ATOM   1276  HA  ALA A  76       4.971   7.175  23.025
ATOM   1277  CB  ALA A  76       5.204   8.656  21.496
ATOM   1278  HB1 ALA A  76       5.224   8.738  20.411
ATOM   1279  HB2 ALA A  76       6.152   9.022  21.890
ATOM   1280  HB3 ALA A  76       4.392   9.276  21.868
ATOM   1281  C   ALA A  76       3.618   6.663  21.448
ATOM   1282  O   ALA A  76       2.766   6.322  22.269
ATOM   1283  N   ILE A  77       3.447   6.511  20.130
ATOM   1284  H   ILE A  77       4.231   6.775  19.535
ATOM   1285  CA  ILE A  77       2.237   6.004  19.459
ATOM   1286  HA  ILE A  77       1.438   6.728  19.623
ATOM   1287  CB  ILE A  77       2.523   5.889  17.940
ATOM   1288  HB  ILE A  77       3.499   5.426  17.818
ATOM   1289  CG2 ILE A  77       1.516   4.993  17.189
ATOM   1290  HG21ILE A  77       1.795   4.914  16.142
ATOM   1291  HG22ILE A  77       0.513   5.405  17.265
ATOM   1292  HG23ILE A  77       1.530   3.975  17.578
ATOM   1293  CG1 ILE A  77       2.582   7.294  17.304
ATOM   1294  HG12ILE A  77       1.578   7.712  17.258
ATOM   1295  HG13ILE A  77       3.178   7.960  17.928
ATOM   1296  CD1 ILE A  77       3.212   7.285  15.905
ATOM   1297  HD11ILE A  77       2.605   6.714  15.208
ATOM   1298  HD12ILE A  77       4.214   6.860  15.946
ATOM   1299  HD13ILE A  77       3.279   8.302  15.535
ATOM   1300  C   ILE A  77       1.749   4.662  20.029
ATOM   1301  O   ILE A  77       0.535   4.485  20.207
ATOM   1302  N   LEU A  78       2.680   3.741  20.315
ATOM   1303  H   LEU A  78       3.644   3.958  20.061
ATOM   1304  CA  LEU A  78       2.414   2.429  20.910
ATOM   1305  HA  LEU A  78       1.523   2.002  20.450
ATOM   1306  CB  LEU A  78       3.617   1.503  20.648
ATOM   1307  HB2 LEU A  78       4.519   1.993  21.019
ATOM   1308  HB3 LEU A  78       3.483   0.585  21.223
ATOM   1309  CG  LEU A  78       3.837   1.119  19.170
ATOM   1310  HG  LEU A  78       3.898   2.013  18.553
ATOM   1311  CD1 LEU A  78       5.148   0.343  19.038
ATOM   1312  HD11LEU A  78       5.977   0.959  19.388
ATOM   1313  HD12LEU A  78       5.320   0.091  17.991
ATOM   1314  HD13LEU A  78       5.107  -0.573  19.628
ATOM   1315  CD2 LEU A  78       2.708   0.246  18.622
ATOM   1316  HD21LEU A  78       2.604  -0.641  19.245
ATOM   1317  HD22LEU A  78       2.941  -0.057  17.601
ATOM   1318  HD23LEU A  78       1.773   0.803  18.604
ATOM   1319  C   LEU A  78       2.144   2.516  22.420
ATOM   1320  O   LEU A  78       1.208   1.884  22.904
ATOM   1321  N   LYS A  79       2.907   3.326  23.169
ATOM   1322  H   LYS A  79       3.680   3.813  22.712
ATOM   1323  CA  LYS A  79       2.710   3.574  24.612
ATOM   1324  HA  LYS A  79       2.700   2.618  25.132
ATOM   1325  CB  LYS A  79       3.880   4.408  25.157
ATOM   1326  HB2 LYS A  79       4.027   5.285  24.525
ATOM   1327  HB3 LYS A  79       3.646   4.753  26.165
ATOM   1328  CG  LYS A  79       5.171   3.578  25.226
ATOM   1329  HG2 LYS A  79       5.063   2.829  26.005
ATOM   1330  HG3 LYS A  79       5.342   3.049  24.289
ATOM   1331  CD  LYS A  79       6.380   4.463  25.538
ATOM   1332  HD2 LYS A  79       6.444   5.274  24.809
ATOM   1333  HD3 LYS A  79       6.259   4.884  26.534
ATOM   1334  CE  LYS A  79       7.658   3.626  25.479
ATOM   1335  HE2 LYS A  79       7.549   2.765  26.144
ATOM   1336  HE3 LYS A  79       7.779   3.254  24.459
ATOM   1337  NZ  LYS A  79       8.843   4.415  25.876
ATOM   1338  HZ1 LYS A  79       9.705   3.878  25.726
ATOM   1339  HZ2 LYS A  79       8.779   4.710  26.850
ATOM   1340  HZ3 LYS A  79       8.950   5.250  25.301
ATOM   1341  C   LYS A  79       1.368   4.245  24.923
ATOM   1342  O   LYS A  79       0.853   4.104  26.044
ATOM   1343  N   LYS A  80       0.762   4.929  23.942
ATOM   1344  H   LYS A  80       1.302   5.139  23.104
ATOM   1345  CA  LYS A  80      -0.639   5.357  24.028
ATOM   1346  HA  LYS A  80      -0.776   5.877  24.977
ATOM   1347  CB  LYS A  80      -1.038   6.315  22.889
ATOM   1348  HB2 LYS A  80      -1.069   5.762  21.950
ATOM   1349  HB3 LYS A  80      -2.053   6.645  23.100
ATOM   1350  CG  LYS A  80      -0.196   7.579  22.674
ATOM   1351  HG2 LYS A  80       0.652   7.327  22.050
ATOM   1352  HG3 LYS A  80      -0.783   8.278  22.086
ATOM   1353  CD  LYS A  80       0.300   8.302  23.932
ATOM   1354  HD2 LYS A  80       0.940   7.636  24.509
ATOM   1355  HD3 LYS A  80       0.920   9.144  23.621
ATOM   1356  CE  LYS A  80      -0.821   8.832  24.835
ATOM   1357  HE2 LYS A  80      -1.383   7.999  25.263
ATOM   1358  HE3 LYS A  80      -0.353   9.384  25.654
ATOM   1359  NZ  LYS A  80      -1.733   9.734  24.100
ATOM   1360  HZ1 LYS A  80      -1.233  10.221  23.350
ATOM   1361  HZ2 LYS A  80      -2.105  10.464  24.706
ATOM   1362  HZ3 LYS A  80      -2.493   9.232  23.644
ATOM   1363  C   LYS A  80      -1.628   4.187  24.031
ATOM   1364  O   LYS A  80      -2.784   4.423  24.373
ATOM   1365  N   LYS A  81      -1.237   2.963  23.650
ATOM   1366  H   LYS A  81      -0.261   2.817  23.398
ATOM   1367  CA  LYS A  81      -2.131   1.806  23.485
ATOM   1368  HA  LYS A  81      -1.563   1.037  22.960
ATOM   1369  CB  LYS A  81      -2.535   1.232  24.856
ATOM   1370  HB2 LYS A  81      -3.050   2.003  25.431
ATOM   1371  HB3 LYS A  81      -3.238   0.416  24.700
ATOM   1372  CG  LYS A  81      -1.368   0.679  25.678
ATOM   1373  HG2 LYS A  81      -0.835  -0.078  25.105
ATOM   1374  HG3 LYS A  81      -0.685   1.486  25.940
ATOM   1375  CD  LYS A  81      -1.963   0.053  26.944
ATOM   1376  HD2 LYS A  81      -2.603   0.794  27.421
ATOM   1377  HD3 LYS A  81      -2.573  -0.810  26.672
ATOM   1378  CE  LYS A  81      -0.899  -0.378  27.948
ATOM   1379  HE2 LYS A  81      -0.328  -1.214  27.541
ATOM   1380  HE3 LYS A  81      -0.221   0.463  28.119
ATOM   1381  NZ  LYS A  81      -1.544  -0.759  29.217
ATOM   1382  HZ1 LYS A  81      -0.881  -0.902  29.975
ATOM   1383  HZ2 LYS A  81      -2.126  -1.596  29.132
ATOM   1384  HZ3 LYS A  81      -2.185  -0.028  29.522
ATOM   1385  C   LYS A  81      -3.357   2.102  22.607
ATOM   1386  O   LYS A  81      -4.469   1.678  22.918
ATOM   1387  N   GLY A  82      -3.190   2.874  21.531
ATOM   1388  H   GLY A  82      -2.254   3.174  21.296
ATOM   1389  CA  GLY A  82      -4.298   3.197  20.622
ATOM   1390  HA2 GLY A  82      -3.920   3.246  19.607
ATOM   1391  HA3 GLY A  82      -5.040   2.396  20.645
ATOM   1392  C   GLY A  82      -5.019   4.514  20.936
ATOM   1393  O   GLY A  82      -6.005   4.820  20.266
ATOM   1394  N   HID A  83      -4.543   5.287  21.923
ATOM   1395  H   HID A  83      -3.794   4.909  22.491
ATOM   1396  CA  HID A  83      -5.080   6.594  22.328
ATOM   1397  HA  HID A  83      -6.071   6.726  21.898
ATOM   1398  CB  HID A  83      -5.227   6.632  23.851
ATOM   1399  HB2 HID A  83      -4.260   6.438  24.305
ATOM   1400  HB3 HID A  83      -5.531   7.635  24.137
ATOM   1401  CG  HID A  83      -6.254   5.711  24.443
ATOM   1402  ND1 HID A  83      -7.573   6.037  24.651
ATOM   1403  HD1 HID A  83      -8.053   6.861  24.268
ATOM   1404  CE1 HID A  83      -8.143   5.043  25.347
ATOM   1405  HE1 HID A  83      -9.187   5.011  25.633
ATOM   1406  NE2 HID A  83      -7.236   4.084  25.621
ATOM   1407  CD2 HID A  83      -6.033   4.500  25.040
ATOM   1408  HD2 HID A  83      -5.090   3.978  25.104
ATOM   1409  C   HID A  83      -4.198   7.758  21.828
ATOM   1410  O   HID A  83      -3.788   8.633  22.600
ATOM   1411  N   HID A  84      -3.842   7.752  20.546
ATOM   1412  H   HID A  84      -4.229   7.023  19.963
ATOM   1413  CA  HID A  84      -2.820   8.619  19.939
ATOM   1414  HA  HID A  84      -2.288   9.138  20.736
ATOM   1415  CB  HID A  84      -1.784   7.716  19.234
ATOM   1416  HB2 HID A  84      -1.190   8.289  18.529
ATOM   1417  HB3 HID A  84      -1.091   7.353  19.990
ATOM   1418  CG  HID A  84      -2.342   6.503  18.535
ATOM   1419  ND1 HID A  84      -1.818   5.231  18.600
ATOM   1420  HD1 HID A  84      -0.972   4.949  19.103
ATOM   1421  CE1 HID A  84      -2.590   4.439  17.836
ATOM   1422  HE1 HID A  84      -2.411   3.385  17.676
ATOM   1423  NE2 HID A  84      -3.637   5.120  17.334
ATOM   1424  CD2 HID A  84      -3.467   6.443  17.757
ATOM   1425  HD2 HID A  84      -4.114   7.275  17.513
ATOM   1426  C   HID A  84      -3.417   9.769  19.091
ATOM   1427  O   HID A  84      -2.847  10.185  18.080
ATOM   1428  N   GLU A  85      -4.563  10.298  19.543
ATOM   1429  H   GLU A  85      -4.914   9.912  20.406
ATOM   1430  CA  GLU A  85      -5.381  11.341  18.899
ATOM   1431  HA  GLU A  85      -5.720  10.959  17.934
ATOM   1432  CB  GLU A  85      -6.626  11.637  19.762
ATOM   1433  HB2 GLU A  85      -6.312  11.909  20.771
ATOM   1434  HB3 GLU A  85      -7.128  12.504  19.331
ATOM   1435  CG  GLU A  85      -7.668  10.507  19.830
ATOM   1436  HG2 GLU A  85      -8.592  10.921  20.237
ATOM   1437  HG3 GLU A  85      -7.887  10.165  18.819
ATOM   1438  CD  GLU A  85      -7.250   9.329  20.716
ATOM   1439  OE1 GLU A  85      -7.119   9.533  21.959
ATOM   1440  OE2 GLU A  85      -7.077   8.203  20.179
ATOM   1441  C   GLU A  85      -4.649  12.672  18.622
ATOM   1442  O   GLU A  85      -5.038  13.406  17.707
ATOM   1443  N   ALA A  86      -3.583  12.998  19.357
ATOM   1444  H   ALA A  86      -3.394  12.452  20.199
ATOM   1445  CA  ALA A  86      -2.734  14.164  19.083
ATOM   1446  HA  ALA A  86      -3.012  14.589  18.120
ATOM   1447  CB  ALA A  86      -3.001  15.236  20.143
ATOM   1448  HB1 ALA A  86      -2.777  14.848  21.131
ATOM   1449  HB2 ALA A  86      -4.048  15.530  20.116
ATOM   1450  HB3 ALA A  86      -2.389  16.116  19.952
ATOM   1451  C   ALA A  86      -1.242  13.814  18.936
ATOM   1452  O   ALA A  86      -0.443  14.712  18.647
ATOM   1453  N   GLU A  87      -0.879  12.528  19.076
ATOM   1454  H   GLU A  87      -1.600  11.869  19.334
ATOM   1455  CA  GLU A  87       0.417  11.959  18.685
ATOM   1456  HA  GLU A  87       1.228  12.612  18.995
ATOM   1457  CB  GLU A  87       0.645  10.589  19.351
ATOM   1458  HB2 GLU A  87      -0.303  10.064  19.429
ATOM   1459  HB3 GLU A  87       1.303   9.992  18.719
ATOM   1460  CG  GLU A  87       1.299  10.658  20.736
ATOM   1461  HG2 GLU A  87       1.500   9.640  21.074
ATOM   1462  HG3 GLU A  87       2.255  11.178  20.647
ATOM   1463  CD  GLU A  87       0.418  11.356  21.768
ATOM   1464  OE1 GLU A  87      -0.762  10.967  21.927
ATOM   1465  OE2 GLU A  87       0.888  12.320  22.430
ATOM   1466  C   GLU A  87       0.510  11.754  17.164
ATOM   1467  O   GLU A  87       1.469  12.196  16.538
ATOM   1468  N   LEU A  88      -0.487  11.113  16.540
ATOM   1469  H   LEU A  88      -1.269  10.790  17.087
ATOM   1470  CA  LEU A  88      -0.448  10.758  15.118
ATOM   1471  HA  LEU A  88       0.506  10.277  14.898
ATOM   1472  CB  LEU A  88      -1.601   9.806  14.757
ATOM   1473  HB2 LEU A  88      -2.542  10.268  15.060
ATOM   1474  HB3 LEU A  88      -1.621   9.706  13.671
ATOM   1475  CG  LEU A  88      -1.549   8.396  15.351
ATOM   1476  HG  LEU A  88      -1.627   8.457  16.428
ATOM   1477  CD1 LEU A  88      -2.739   7.626  14.804
ATOM   1478  HD11LEU A  88      -2.704   6.597  15.162
ATOM   1479  HD12LEU A  88      -2.710   7.612  13.715
ATOM   1480  HD13LEU A  88      -3.667   8.090  15.138
ATOM   1481  CD2 LEU A  88      -0.301   7.601  14.991
ATOM   1482  HD21LEU A  88       0.591   8.153  15.269
ATOM   1483  HD22LEU A  88      -0.287   7.397  13.926
ATOM   1484  HD23LEU A  88      -0.319   6.652  15.523
ATOM   1485  C   LEU A  88      -0.571  11.962  14.185
ATOM   1486  O   LEU A  88       0.162  12.054  13.215
ATOM   1487  N   LYS A  89      -1.544  12.843  14.405
ATOM   1488  H   LYS A  89      -2.096  12.705  15.225
ATOM   1489  CA  LYS A  89      -1.962  13.872  13.449
ATOM   1490  HA  LYS A  89      -2.385  13.336  12.599
ATOM   1491  CB  LYS A  89      -3.101  14.703  14.062
ATOM   1492  HB2 LYS A  89      -3.734  14.022  14.634
ATOM   1493  HB3 LYS A  89      -2.717  15.444  14.764
ATOM   1494  CG  LYS A  89      -4.023  15.392  13.044
ATOM   1495  HG2 LYS A  89      -4.378  14.659  12.318
ATOM   1496  HG3 LYS A  89      -4.887  15.757  13.600
ATOM   1497  CD  LYS A  89      -3.406  16.588  12.306
ATOM   1498  HD2 LYS A  89      -2.943  17.257  13.033
ATOM   1499  HD3 LYS A  89      -2.663  16.255  11.585
ATOM   1500  CE  LYS A  89      -4.512  17.334  11.559
ATOM   1501  HE2 LYS A  89      -4.905  16.708  10.753
ATOM   1502  HE3 LYS A  89      -5.327  17.526  12.265
ATOM   1503  NZ  LYS A  89      -4.035  18.628  11.028
ATOM   1504  HZ1 LYS A  89      -3.532  19.137  11.757
ATOM   1505  HZ2 LYS A  89      -4.837  19.202  10.794
ATOM   1506  HZ3 LYS A  89      -3.420  18.540  10.216
ATOM   1507  C   LYS A  89      -0.800  14.723  12.895
ATOM   1508  O   LYS A  89      -0.680  14.785  11.667
ATOM   1509  N   PRO A  90       0.105  15.299  13.721
ATOM   1510  CD  PRO A  90       0.079  15.365  15.184
ATOM   1511  HD2 PRO A  90      -0.074  14.391  15.641
ATOM   1512  HD3 PRO A  90      -0.710  16.045  15.511
ATOM   1513  CG  PRO A  90       1.444  15.889  15.626
ATOM   1514  HG2 PRO A  90       2.099  15.040  15.822
ATOM   1515  HG3 PRO A  90       1.373  16.526  16.518
ATOM   1516  CB  PRO A  90       1.968  16.642  14.402
ATOM   1517  HB2 PRO A  90       3.050  16.548  14.326
ATOM   1518  HB3 PRO A  90       1.687  17.694  14.483
ATOM   1519  CA  PRO A  90       1.260  16.022  13.188
ATOM   1520  HA  PRO A  90       0.904  16.836  12.555
ATOM   1521  C   PRO A  90       2.172  15.134  12.323
ATOM   1522  O   PRO A  90       2.639  15.571  11.271
ATOM   1523  N   LEU A  91       2.383  13.872  12.695
ATOM   1524  H   LEU A  91       1.921  13.548  13.534
ATOM   1525  CA  LEU A  91       3.186  12.898  11.937
ATOM   1526  HA  LEU A  91       4.136  13.355  11.659
ATOM   1527  CB  LEU A  91       3.478  11.691  12.850
ATOM   1528  HB2 LEU A  91       2.543  11.188  13.089
ATOM   1529  HB3 LEU A  91       4.096  10.980  12.299
ATOM   1530  CG  LEU A  91       4.189  12.049  14.171
ATOM   1531  HG  LEU A  91       3.626  12.811  14.706
ATOM   1532  CD1 LEU A  91       4.269  10.819  15.063
ATOM   1533  HD11LEU A  91       3.257  10.506  15.313
ATOM   1534  HD12LEU A  91       4.781  11.073  15.992
ATOM   1535  HD13LEU A  91       4.797  10.014  14.551
ATOM   1536  CD2 LEU A  91       5.601  12.562  13.922
ATOM   1537  HD21LEU A  91       5.555  13.550  13.476
ATOM   1538  HD22LEU A  91       6.121  11.892  13.240
ATOM   1539  HD23LEU A  91       6.134  12.636  14.869
ATOM   1540  C   LEU A  91       2.494  12.447  10.630
ATOM   1541  O   LEU A  91       3.067  12.508   9.543
ATOM   1542  N   ALA A  92       1.223  12.063  10.707
ATOM   1543  H   ALA A  92       0.809  12.037  11.629
ATOM   1544  CA  ALA A  92       0.394  11.689   9.567
ATOM   1545  HA  ALA A  92       0.832  10.808   9.098
ATOM   1546  CB  ALA A  92      -1.012  11.334  10.060
ATOM   1547  HB1 ALA A  92      -1.567  10.875   9.242
ATOM   1548  HB2 ALA A  92      -1.530  12.231  10.399
ATOM   1549  HB3 ALA A  92      -0.957  10.634  10.888
ATOM   1550  C   ALA A  92       0.323  12.818   8.531
ATOM   1551  O   ALA A  92       0.477  12.572   7.338
ATOM   1552  N   GLN A  93       0.145  14.065   8.984
ATOM   1553  H   GLN A  93       0.024  14.211   9.983
ATOM   1554  CA  GLN A  93       0.120  15.225   8.094
ATOM   1555  HA  GLN A  93      -0.592  15.005   7.307
ATOM   1556  CB  GLN A  93      -0.354  16.480   8.832
ATOM   1557  HB2 GLN A  93      -1.295  16.256   9.335
ATOM   1558  HB3 GLN A  93       0.380  16.762   9.586
ATOM   1559  CG  GLN A  93      -0.582  17.648   7.865
ATOM   1560  HG2 GLN A  93       0.348  17.945   7.383
ATOM   1561  HG3 GLN A  93      -1.300  17.350   7.098
ATOM   1562  CD  GLN A  93      -1.127  18.829   8.625
ATOM   1563  OE1 GLN A  93      -2.323  18.914   8.901
ATOM   1564  NE2 GLN A  93      -0.294  19.750   9.049
ATOM   1565  HE21GLN A  93      -0.617  20.393   9.774
ATOM   1566  HE22GLN A  93       0.693  19.685   8.803
ATOM   1567  C   GLN A  93       1.460  15.473   7.411
ATOM   1568  O   GLN A  93       1.477  15.647   6.192
ATOM   1569  N   SER A  94       2.581  15.451   8.138
ATOM   1570  H   SER A  94       2.540  15.276   9.136
ATOM   1571  CA  SER A  94       3.894  15.601   7.504
ATOM   1572  HA  SER A  94       3.912  16.573   7.011
ATOM   1573  CB  SER A  94       5.024  15.599   8.542
ATOM   1574  HB2 SER A  94       5.956  15.815   8.027
ATOM   1575  HB3 SER A  94       4.843  16.380   9.282
ATOM   1576  OG  SER A  94       5.146  14.351   9.188
ATOM   1577  HG  SER A  94       5.933  14.361   9.781
ATOM   1578  C   SER A  94       4.120  14.527   6.425
ATOM   1579  O   SER A  94       4.546  14.846   5.312
ATOM   1580  N   ALALA  95       3.725  13.276   6.682
ATOM   1581  H   ALALA  95       3.364  13.074   7.610
ATOM   1582  CA  ALALA  95       3.842  12.190   5.707
ATOM   1583  HA  ALALA  95       4.828  12.268   5.265
ATOM   1584  CB  ALALA  95       3.812  10.831   6.426
ATOM   1585  HB1 ALALA  95       2.901  10.756   7.023
ATOM   1586  HB2 ALALA  95       3.784  10.053   5.662
ATOM   1587  C   ALALA  95       2.840  12.312   4.528
ATOM   1588  O   ALALA  95       3.222  12.071   3.384
ATOM   1589  N   ALA A  96       1.619  12.806   4.762
ATOM   1590  H   ALA A  96       1.342  12.923   5.733
ATOM   1591  CA  ALA A  96       0.589  13.070   3.739
ATOM   1592  HA  ALA A  96       0.552  12.215   3.063
ATOM   1593  CB  ALA A  96      -0.768  13.182   4.445
ATOM   1594  HB1 ALA A  96      -0.766  14.039   5.120
ATOM   1595  HB2 ALA A  96      -0.964  12.280   5.017
ATOM   1596  HB3 ALA A  96      -1.564  13.312   3.712
ATOM   1597  C   ALA A  96       0.807  14.343   2.884
ATOM   1598  O   ALA A  96       0.073  14.584   1.921
ATOM   1599  N   THR A  97       1.770  15.198   3.237
ATOM   1600  H   THR A  97       2.260  14.996   4.098
ATOM   1601  CA  THR A  97       1.951  16.522   2.599
ATOM   1602  HA  THR A  97       1.378  16.559   1.673
ATOM   1603  CB  THR A  97       1.442  17.676   3.488
ATOM   1604  HB  THR A  97       1.631  18.637   3.002
ATOM   1605  CG2 THR A  97      -0.043  17.588   3.809
ATOM   1606  HG21THR A  97      -0.625  17.618   2.889
ATOM   1607  HG22THR A  97      -0.329  18.439   4.429
ATOM   1608  HG23THR A  97      -0.274  16.669   4.344
ATOM   1609  OG1 THR A  97       2.129  17.662   4.713
ATOM   1610  HG1 THR A  97       1.747  16.934   5.246
ATOM   1611  C   THR A  97       3.402  16.819   2.221
ATOM   1612  O   THR A  97       3.641  17.276   1.100
ATOM   1613  N   LYS A  98       4.382  16.504   3.074
ATOM   1614  H   LYS A  98       4.126  16.105   3.971
ATOM   1615  CA  LYS A  98       5.785  16.896   2.899
ATOM   1616  HA  LYS A  98       5.859  17.553   2.031
ATOM   1617  CB  LYS A  98       6.243  17.720   4.114
ATOM   1618  HB2 LYS A  98       5.546  18.546   4.249
ATOM   1619  HB3 LYS A  98       6.236  17.103   5.014
ATOM   1620  CG  LYS A  98       7.651  18.296   3.894
ATOM   1621  HG2 LYS A  98       8.379  17.483   3.901
ATOM   1622  HG3 LYS A  98       7.679  18.778   2.919
ATOM   1623  CD  LYS A  98       8.033  19.326   4.967
ATOM   1624  HD2 LYS A  98       7.217  20.039   5.084
ATOM   1625  HD3 LYS A  98       8.171  18.824   5.923
ATOM   1626  CE  LYS A  98       9.299  20.120   4.609
ATOM   1627  HE2 LYS A  98       9.094  20.739   3.735
ATOM   1628  HE3 LYS A  98       9.544  20.779   5.443
ATOM   1629  NZ  LYS A  98      10.460  19.260   4.320
ATOM   1630  HZ1 LYS A  98      10.638  18.604   5.071
ATOM   1631  HZ2 LYS A  98      11.291  19.825   4.182
ATOM   1632  HZ3 LYS A  98      10.326  18.765   3.449
ATOM   1633  C   LYS A  98       6.727  15.712   2.635
ATOM   1634  O   LYS A  98       7.562  15.825   1.745
ATOM   1635  N   HID A  99       6.593  14.574   3.318
ATOM   1636  H   HID A  99       5.936  14.536   4.091
ATOM   1637  CA  HID A  99       7.375  13.374   2.977
ATOM   1638  HA  HID A  99       8.366  13.696   2.654
ATOM   1639  CB  HID A  99       7.595  12.501   4.220
ATOM   1640  HB2 HID A  99       6.670  12.008   4.488
ATOM   1641  HB3 HID A  99       8.318  11.723   3.983
ATOM   1642  CG  HID A  99       8.091  13.267   5.416
ATOM   1643  ND1 HID A  99       9.307  13.892   5.545
ATOM   1644  HD1 HID A  99      10.097  13.788   4.926
ATOM   1645  CE1 HID A  99       9.321  14.518   6.732
ATOM   1646  HE1 HID A  99      10.168  15.060   7.129
ATOM   1647  NE2 HID A  99       8.159  14.344   7.380
ATOM   1648  CD2 HID A  99       7.385  13.526   6.558
ATOM   1649  HD2 HID A  99       6.399  13.160   6.784
ATOM   1650  C   HID A  99       6.748  12.578   1.805
ATOM   1651  O   HID A  99       7.468  11.913   1.065
ATOM   1652  N   LYS A 100       5.432  12.712   1.584
ATOM   1653  H   LYS A 100       4.899  13.200   2.287
ATOM   1654  CA  LYS A 100       4.650  12.023   0.542
ATOM   1655  HA  LYS A 100       3.602  12.111   0.833
ATOM   1656  CB  LYS A 100       4.780  12.740  -0.813
ATOM   1657  HB2 LYS A 100       5.828  12.936  -1.048
ATOM   1658  HB3 LYS A 100       4.364  12.093  -1.585
ATOM   1659  CG  LYS A 100       3.980  14.049  -0.792
ATOM   1660  HG2 LYS A 100       2.976  13.824  -0.427
ATOM   1661  HG3 LYS A 100       4.449  14.759  -0.109
ATOM   1662  CD  LYS A 100       3.864  14.676  -2.189
ATOM   1663  HD2 LYS A 100       4.755  15.262  -2.422
ATOM   1664  HD3 LYS A 100       3.782  13.889  -2.934
ATOM   1665  CE  LYS A 100       2.597  15.537  -2.256
ATOM   1666  HE2 LYS A 100       2.332  15.689  -3.306
ATOM   1667  HE3 LYS A 100       1.773  14.998  -1.783
ATOM   1668  NZ  LYS A 100       2.791  16.853  -1.614
ATOM   1669  HZ1 LYS A 100       1.904  17.330  -1.451
ATOM   1670  HZ2 LYS A 100       3.384  17.416  -2.227
ATOM   1671  HZ3 LYS A 100       3.249  16.762  -0.710
ATOM   1672  C   LYS A 100       4.898  10.506   0.478
ATOM   1673  O   LYS A 100       5.559   9.994  -0.428
ATOM   1674  N   ILE A 101       4.378   9.804   1.487
ATOM   1675  H   ILE A 101       3.794  10.300   2.150
ATOM   1676  CA  ILE A 101       4.696   8.402   1.797
ATOM   1677  HA  ILE A 101       5.411   8.032   1.066
ATOM   1678  CB  ILE A 101       5.344   8.317   3.199
ATOM   1679  HB  ILE A 101       4.610   8.657   3.932
ATOM   1680  CG2 ILE A 101       5.713   6.871   3.571
ATOM   1681  HG21ILE A 101       6.292   6.856   4.497
ATOM   1682  HG22ILE A 101       6.296   6.413   2.775
ATOM   1683  HG23ILE A 101       4.810   6.284   3.741
ATOM   1684  CG1 ILE A 101       6.571   9.235   3.339
ATOM   1685  HG12ILE A 101       6.236  10.261   3.241
ATOM   1686  HG13ILE A 101       6.982   9.128   4.341
ATOM   1687  CD1 ILE A 101       7.684   8.992   2.317
ATOM   1688  HD11ILE A 101       7.317   9.157   1.309
ATOM   1689  HD12ILE A 101       8.051   7.975   2.397
ATOM   1690  HD13ILE A 101       8.503   9.686   2.500
ATOM   1691  C   ILE A 101       3.431   7.533   1.761
ATOM   1692  O   ILE A 101       2.442   7.893   2.398
ATOM   1693  N   PRO A 102       3.427   6.384   1.062
ATOM   1694  CD  PRO A 102       4.469   5.899   0.167
ATOM   1695  HD2 PRO A 102       5.435   5.864   0.666
ATOM   1696  HD3 PRO A 102       4.520   6.542  -0.714
ATOM   1697  CG  PRO A 102       4.041   4.492  -0.245
ATOM   1698  HG2 PRO A 102       4.423   3.763   0.466
ATOM   1699  HG3 PRO A 102       4.376   4.242  -1.248
ATOM   1700  CB  PRO A 102       2.520   4.564  -0.122
ATOM   1701  HB2 PRO A 102       2.066   3.577  -0.026
ATOM   1702  HB3 PRO A 102       2.104   5.106  -0.967
ATOM   1703  CA  PRO A 102       2.325   5.428   1.117
ATOM   1704  HA  PRO A 102       1.366   5.944   1.062
ATOM   1705  C   PRO A 102       2.378   4.567   2.379
ATOM   1706  O   PRO A 102       3.443   4.185   2.867
ATOM   1707  N   ILE A 103       1.207   4.130   2.837
ATOM   1708  H   ILE A 103       0.371   4.477   2.393
ATOM   1709  CA  ILE A 103       1.075   3.196   3.968
ATOM   1710  HA  ILE A 103       1.485   3.676   4.856
ATOM   1711  CB  ILE A 103      -0.414   2.885   4.216
ATOM   1712  HB  ILE A 103      -0.822   2.418   3.317
ATOM   1713  CG2 ILE A 103      -0.573   1.884   5.369
ATOM   1714  HG21ILE A 103       0.008   2.203   6.235
ATOM   1715  HG22ILE A 103      -0.247   0.888   5.063
ATOM   1716  HG23ILE A 103      -1.620   1.817   5.646
ATOM   1717  CG1 ILE A 103      -1.246   4.154   4.494
ATOM   1718  HG12ILE A 103      -1.159   4.844   3.655
ATOM   1719  HG13ILE A 103      -2.292   3.863   4.545
ATOM   1720  CD1 ILE A 103      -0.875   4.902   5.782
ATOM   1721  HD11ILE A 103      -1.497   5.789   5.870
ATOM   1722  HD12ILE A 103       0.165   5.219   5.750
ATOM   1723  HD13ILE A 103      -1.040   4.275   6.658
ATOM   1724  C   ILE A 103       1.879   1.901   3.758
ATOM   1725  O   ILE A 103       2.447   1.357   4.700
ATOM   1726  N   LYS A 104       2.006   1.446   2.510
ATOM   1727  H   LYS A 104       1.528   1.939   1.772
ATOM   1728  CA  LYS A 104       2.828   0.291   2.155
ATOM   1729  HA  LYS A 104       2.416  -0.566   2.686
ATOM   1730  CB  LYS A 104       2.678   0.046   0.649
ATOM   1731  HB2 LYS A 104       1.617   0.103   0.399
ATOM   1732  HB3 LYS A 104       3.187   0.847   0.113
ATOM   1733  CG  LYS A 104       3.221  -1.302   0.136
ATOM   1734  HG2 LYS A 104       2.999  -1.368  -0.929
ATOM   1735  HG3 LYS A 104       4.304  -1.305   0.245
ATOM   1736  CD  LYS A 104       2.654  -2.561   0.809
ATOM   1737  HD2 LYS A 104       3.061  -3.437   0.302
ATOM   1738  HD3 LYS A 104       2.981  -2.600   1.848
ATOM   1739  CE  LYS A 104       1.123  -2.610   0.750
ATOM   1740  HE2 LYS A 104       0.723  -1.810   1.377
ATOM   1741  HE3 LYS A 104       0.790  -2.439  -0.277
ATOM   1742  NZ  LYS A 104       0.609  -3.910   1.229
ATOM   1743  HZ1 LYS A 104       0.626  -4.623   0.504
ATOM   1744  HZ2 LYS A 104      -0.355  -3.816   1.551
ATOM   1745  HZ3 LYS A 104       1.127  -4.225   2.052
ATOM   1746  C   LYS A 104       4.310   0.430   2.564
ATOM   1747  O   LYS A 104       4.958  -0.574   2.829
ATOM   1748  N   TYR A 105       4.857   1.645   2.678
ATOM   1749  H   TYR A 105       4.295   2.468   2.490
ATOM   1750  CA  TYR A 105       6.237   1.839   3.155
ATOM   1751  HA  TYR A 105       6.853   1.008   2.813
ATOM   1752  CB  TYR A 105       6.847   3.116   2.564
ATOM   1753  HB2 TYR A 105       6.219   3.961   2.848
ATOM   1754  HB3 TYR A 105       7.817   3.262   3.032
ATOM   1755  CG  TYR A 105       7.041   3.151   1.049
ATOM   1756  CD1 TYR A 105       6.645   2.080   0.219
ATOM   1757  HD1 TYR A 105       6.281   1.154   0.632
ATOM   1758  CE1 TYR A 105       6.681   2.206  -1.176
ATOM   1759  HE1 TYR A 105       6.355   1.380  -1.785
ATOM   1760  CZ  TYR A 105       7.123   3.396  -1.768
ATOM   1761  OH  TYR A 105       7.019   3.555  -3.120
ATOM   1762  HH  TYR A 105       6.460   2.821  -3.510
ATOM   1763  CE2 TYR A 105       7.639   4.419  -0.954
ATOM   1764  HE2 TYR A 105       8.055   5.307  -1.406
ATOM   1765  CD2 TYR A 105       7.588   4.303   0.448
ATOM   1766  HD2 TYR A 105       7.941   5.119   1.061
ATOM   1767  C   TYR A 105       6.311   1.827   4.687
ATOM   1768  O   TYR A 105       7.229   1.223   5.242
ATOM   1769  N   LEU A 106       5.286   2.341   5.378
ATOM   1770  H   LEU A 106       4.554   2.813   4.866
ATOM   1771  CA  LEU A 106       5.090   2.071   6.810
ATOM   1772  HA  LEU A 106       5.949   2.461   7.352
ATOM   1773  CB  LEU A 106       3.843   2.798   7.348
ATOM   1774  HB2 LEU A 106       2.959   2.275   6.992
ATOM   1775  HB3 LEU A 106       3.855   2.715   8.435
ATOM   1776  CG  LEU A 106       3.690   4.282   6.970
ATOM   1777  HG  LEU A 106       3.572   4.365   5.891
ATOM   1778  CD1 LEU A 106       2.422   4.816   7.630
ATOM   1779  HD11LEU A 106       1.573   4.186   7.374
ATOM   1780  HD12LEU A 106       2.240   5.824   7.264
ATOM   1781  HD13LEU A 106       2.541   4.838   8.713
ATOM   1782  CD2 LEU A 106       4.865   5.151   7.407
ATOM   1783  HD21LEU A 106       5.773   4.840   6.894
ATOM   1784  HD22LEU A 106       5.017   5.076   8.484
ATOM   1785  HD23LEU A 106       4.672   6.192   7.148
ATOM   1786  C   LEU A 106       4.988   0.550   7.076
ATOM   1787  O   LEU A 106       5.502   0.028   8.063
ATOM   1788  N   GLU A 107       4.350  -0.184   6.158
ATOM   1789  H   GLU A 107       3.868   0.342   5.434
ATOM   1790  CA  GLU A 107       4.222  -1.656   6.142
ATOM   1791  HA  GLU A 107       3.938  -1.981   7.142
ATOM   1792  CB  GLU A 107       3.082  -2.032   5.186
ATOM   1793  HB2 GLU A 107       2.274  -1.309   5.301
ATOM   1794  HB3 GLU A 107       3.438  -1.993   4.162
ATOM   1795  CG  GLU A 107       2.509  -3.410   5.455
ATOM   1796  HG2 GLU A 107       3.299  -4.154   5.358
ATOM   1797  HG3 GLU A 107       2.120  -3.464   6.467
ATOM   1798  CD  GLU A 107       1.398  -3.715   4.457
ATOM   1799  OE1 GLU A 107       0.301  -3.103   4.513
ATOM   1800  OE2 GLU A 107       1.612  -4.620   3.611
ATOM   1801  C   GLU A 107       5.519  -2.399   5.770
ATOM   1802  O   GLU A 107       5.713  -3.543   6.184
ATOM   1803  N   PHE A 108       6.439  -1.759   5.048
ATOM   1804  H   PHE A 108       6.182  -0.878   4.626
ATOM   1805  CA  PHE A 108       7.809  -2.255   4.858
ATOM   1806  HA  PHE A 108       7.771  -3.325   4.647
ATOM   1807  CB  PHE A 108       8.509  -1.553   3.682
ATOM   1808  HB2 PHE A 108       8.571  -0.488   3.897
ATOM   1809  HB3 PHE A 108       9.529  -1.933   3.639
ATOM   1810  CG  PHE A 108       7.930  -1.721   2.290
ATOM   1811  CD1 PHE A 108       7.075  -2.790   1.961
ATOM   1812  HD1 PHE A 108       6.768  -3.508   2.704
ATOM   1813  CE1 PHE A 108       6.595  -2.926   0.649
ATOM   1814  HE1 PHE A 108       5.917  -3.729   0.418
ATOM   1815  CZ  PHE A 108       6.997  -2.028  -0.353
ATOM   1816  HZ  PHE A 108       6.642  -2.151  -1.365
ATOM   1817  CE2 PHE A 108       7.862  -0.971  -0.034
ATOM   1818  HE2 PHE A 108       8.180  -0.283  -0.803
ATOM   1819  CD2 PHE A 108       8.312  -0.808   1.287
ATOM   1820  HD2 PHE A 108       8.974   0.011   1.528
ATOM   1821  C   PHE A 108       8.671  -2.076   6.117
ATOM   1822  O   PHE A 108       9.313  -3.032   6.552
ATOM   1823  N   ILE A 109       8.670  -0.895   6.756
ATOM   1824  H   ILE A 109       8.149  -0.115   6.364
ATOM   1825  CA  ILE A 109       9.393  -0.730   8.031
ATOM   1826  HA  ILE A 109      10.388  -1.141   7.870
ATOM   1827  CB  ILE A 109       9.597   0.753   8.412
ATOM   1828  HB  ILE A 109       9.901   1.280   7.508
ATOM   1829  CG2 ILE A 109       8.308   1.401   8.924
ATOM   1830  HG21ILE A 109       7.568   1.361   8.136
ATOM   1831  HG22ILE A 109       8.485   2.444   9.165
ATOM   1832  HG23ILE A 109       7.936   0.903   9.819
ATOM   1833  CG1 ILE A 109      10.744   0.896   9.436
ATOM   1834  HG12ILE A 109      10.464   0.416  10.374
ATOM   1835  HG13ILE A 109      11.622   0.385   9.040
ATOM   1836  CD1 ILE A 109      11.147   2.348   9.738
ATOM   1837  HD11ILE A 109      12.055   2.356  10.340
ATOM   1838  HD12ILE A 109      10.361   2.853  10.299
ATOM   1839  HD13ILE A 109      11.335   2.889   8.810
ATOM   1840  C   ILE A 109       8.761  -1.571   9.153
ATOM   1841  O   ILE A 109       9.471  -2.045  10.032
ATOM   1842  N   SER A 110       7.456  -1.849   9.076
ATOM   1843  H   SER A 110       6.908  -1.353   8.386
ATOM   1844  CA  SER A 110       6.794  -2.829   9.942
ATOM   1845  HA  SER A 110       6.920  -2.496  10.971
ATOM   1846  CB  SER A 110       5.292  -2.896   9.641
ATOM   1847  HB2 SER A 110       5.142  -3.162   8.597
ATOM   1848  HB3 SER A 110       4.824  -3.669  10.255
ATOM   1849  OG  SER A 110       4.661  -1.658   9.917
ATOM   1850  HG  SER A 110       5.072  -0.974   9.352
ATOM   1851  C   SER A 110       7.402  -4.237   9.825
ATOM   1852  O   SER A 110       7.682  -4.857  10.849
ATOM   1853  N   GLU A 111       7.680  -4.726   8.608
ATOM   1854  H   GLU A 111       7.460  -4.177   7.787
ATOM   1855  CA  GLU A 111       8.400  -5.990   8.427
ATOM   1856  HA  GLU A 111       7.904  -6.751   9.032
ATOM   1857  CB  GLU A 111       8.351  -6.437   6.960
ATOM   1858  HB2 GLU A 111       7.383  -6.151   6.551
ATOM   1859  HB3 GLU A 111       9.119  -5.929   6.376
ATOM   1860  CG  GLU A 111       8.477  -7.960   6.806
ATOM   1861  HG2 GLU A 111       7.687  -8.416   7.400
ATOM   1862  HG3 GLU A 111       8.289  -8.212   5.762
ATOM   1863  CD  GLU A 111       9.844  -8.552   7.178
ATOM   1864  OE1 GLU A 111      10.845  -8.100   6.562
ATOM   1865  OE2 GLU A 111       9.888  -9.535   7.970
ATOM   1866  C   GLU A 111       9.849  -5.871   8.905
ATOM   1867  O   GLU A 111      10.346  -6.780   9.565
ATOM   1868  N   ALA A 112      10.515  -4.739   8.642
ATOM   1869  H   ALA A 112      10.076  -4.034   8.055
ATOM   1870  CA  ALA A 112      11.867  -4.507   9.141
ATOM   1871  HA  ALA A 112      12.480  -5.315   8.757
ATOM   1872  CB  ALA A 112      12.400  -3.179   8.595
ATOM   1873  HB1 ALA A 112      13.447  -3.077   8.871
ATOM   1874  HB2 ALA A 112      11.847  -2.346   9.021
ATOM   1875  HB3 ALA A 112      12.312  -3.155   7.508
ATOM   1876  C   ALA A 112      11.947  -4.578  10.677
ATOM   1877  O   ALA A 112      12.848  -5.224  11.214
ATOM   1878  N   ILE A 113      10.970  -3.991  11.377
ATOM   1879  H   ILE A 113      10.279  -3.457  10.856
ATOM   1880  CA  ILE A 113      10.768  -4.149  12.819
ATOM   1881  HA  ILE A 113      11.661  -3.802  13.340
ATOM   1882  CB  ILE A 113       9.579  -3.263  13.268
ATOM   1883  HB  ILE A 113       8.755  -3.412  12.573
ATOM   1884  CG2 ILE A 113       9.073  -3.627  14.673
ATOM   1885  HG21ILE A 113       8.276  -2.950  14.966
ATOM   1886  HG22ILE A 113       9.882  -3.546  15.396
ATOM   1887  HG23ILE A 113       8.667  -4.638  14.683
ATOM   1888  CG1 ILE A 113       9.982  -1.770  13.237
ATOM   1889  HG12ILE A 113      10.564  -1.541  14.128
ATOM   1890  HG13ILE A 113      10.607  -1.570  12.368
ATOM   1891  CD1 ILE A 113       8.791  -0.807  13.175
ATOM   1892  HD11ILE A 113       9.160   0.217  13.107
ATOM   1893  HD12ILE A 113       8.180  -0.901  14.070
ATOM   1894  HD13ILE A 113       8.182  -1.019  12.297
ATOM   1895  C   ILE A 113      10.599  -5.634  13.180
ATOM   1896  O   ILE A 113      11.313  -6.124  14.049
ATOM   1897  N   ILE A 114       9.717  -6.379  12.503
ATOM   1898  H   ILE A 114       9.164  -5.930  11.776
ATOM   1899  CA  ILE A 114       9.458  -7.802  12.797
ATOM   1900  HA  ILE A 114       9.246  -7.893  13.863
ATOM   1901  CB  ILE A 114       8.189  -8.244  12.028
ATOM   1902  HB  ILE A 114       8.294  -7.928  10.990
ATOM   1903  CG2 ILE A 114       7.982  -9.769  12.034
ATOM   1904  HG21ILE A 114       8.759 -10.248  11.443
ATOM   1905  HG22ILE A 114       7.033 -10.032  11.567
ATOM   1906  HG23ILE A 114       7.998 -10.154  13.054
ATOM   1907  CG1 ILE A 114       6.955  -7.543  12.645
ATOM   1908  HG12ILE A 114       6.691  -8.024  13.588
ATOM   1909  HG13ILE A 114       7.181  -6.500  12.862
ATOM   1910  CD1 ILE A 114       5.741  -7.548  11.716
ATOM   1911  HD11ILE A 114       6.013  -7.154  10.736
ATOM   1912  HD12ILE A 114       4.971  -6.911  12.145
ATOM   1913  HD13ILE A 114       5.350  -8.559  11.606
ATOM   1914  C   ILE A 114      10.686  -8.700  12.528
ATOM   1915  O   ILE A 114      10.909  -9.675  13.256
ATOM   1916  N   HID A 115      11.513  -8.369  11.531
ATOM   1917  H   HID A 115      11.209  -7.630  10.896
ATOM   1918  CA  HID A 115      12.815  -8.997  11.280
ATOM   1919  HA  HID A 115      12.696 -10.078  11.251
ATOM   1920  CB  HID A 115      13.333  -8.516   9.912
ATOM   1921  HB2 HID A 115      12.728  -8.973   9.129
ATOM   1922  HB3 HID A 115      13.190  -7.438   9.843
ATOM   1923  CG  HID A 115      14.794  -8.804   9.643
ATOM   1924  ND1 HID A 115      15.856  -7.997   9.988
ATOM   1925  HD1 HID A 115      15.799  -7.115  10.476
ATOM   1926  CE1 HID A 115      16.985  -8.578   9.549
ATOM   1927  HE1 HID A 115      17.980  -8.168   9.669
ATOM   1928  NE2 HID A 115      16.706  -9.731   8.921
ATOM   1929  CD2 HID A 115      15.315  -9.885   8.983
ATOM   1930  HD2 HID A 115      14.747 -10.700   8.561
ATOM   1931  C   HID A 115      13.830  -8.687  12.388
ATOM   1932  O   HID A 115      14.518  -9.590  12.877
ATOM   1933  N   VAL A 116      13.948  -7.412  12.782
ATOM   1934  H   VAL A 116      13.359  -6.705  12.340
ATOM   1935  CA  VAL A 116      14.963  -6.969  13.741
ATOM   1936  HA  VAL A 116      15.888  -7.499  13.519
ATOM   1937  CB  VAL A 116      15.262  -5.468  13.576
ATOM   1938  HB  VAL A 116      14.330  -4.903  13.607
ATOM   1939  CG1 VAL A 116      16.193  -4.945  14.677
ATOM   1940  HG11VAL A 116      15.667  -4.950  15.629
ATOM   1941  HG12VAL A 116      16.504  -3.921  14.462
ATOM   1942  HG13VAL A 116      17.076  -5.579  14.741
ATOM   1943  CG2 VAL A 116      15.962  -5.239  12.228
ATOM   1944  HG21VAL A 116      16.891  -5.809  12.178
ATOM   1945  HG22VAL A 116      16.195  -4.185  12.118
ATOM   1946  HG23VAL A 116      15.312  -5.520  11.404
ATOM   1947  C   VAL A 116      14.597  -7.340  15.179
ATOM   1948  O   VAL A 116      15.479  -7.784  15.906
ATOM   1949  N   LEU A 117      13.327  -7.255  15.592
ATOM   1950  H   LEU A 117      12.626  -6.867  14.961
ATOM   1951  CA  LEU A 117      12.894  -7.707  16.921
ATOM   1952  HA  LEU A 117      13.524  -7.229  17.673
ATOM   1953  CB  LEU A 117      11.433  -7.297  17.187
ATOM   1954  HB2 LEU A 117      10.857  -7.391  16.266
ATOM   1955  HB3 LEU A 117      11.012  -7.999  17.905
ATOM   1956  CG  LEU A 117      11.243  -5.890  17.795
ATOM   1957  HG  LEU A 117      11.572  -5.923  18.832
ATOM   1958  CD1 LEU A 117      12.029  -4.768  17.109
ATOM   1959  HD11LEU A 117      11.768  -3.807  17.551
ATOM   1960  HD12LEU A 117      11.800  -4.737  16.048
ATOM   1961  HD13LEU A 117      13.098  -4.924  17.241
ATOM   1962  CD2 LEU A 117       9.755  -5.533  17.807
ATOM   1963  HD21LEU A 117       9.211  -6.264  18.405
ATOM   1964  HD22LEU A 117       9.363  -5.541  16.792
ATOM   1965  HD23LEU A 117       9.612  -4.547  18.247
ATOM   1966  C   LEU A 117      13.108  -9.219  17.088
ATOM   1967  O   LEU A 117      13.614  -9.638  18.122
ATOM   1968  N   HID A 118      12.852 -10.040  16.061
ATOM   1969  H   HID A 118      12.414  -9.671  15.225
ATOM   1970  CA  HID A 118      13.235 -11.457  16.090
ATOM   1971  HA  HID A 118      12.897 -11.886  17.034
ATOM   1972  CB  HID A 118      12.515 -12.196  14.952
ATOM   1973  HB2 HID A 118      11.436 -12.112  15.083
ATOM   1974  HB3 HID A 118      12.781 -11.732  14.001
ATOM   1975  CG  HID A 118      12.884 -13.653  14.897
ATOM   1976  ND1 HID A 118      13.668 -14.234  13.932
ATOM   1977  HD1 HID A 118      14.001 -13.780  13.082
ATOM   1978  CE1 HID A 118      13.996 -15.465  14.344
ATOM   1979  HE1 HID A 118      14.644 -16.142  13.807
ATOM   1980  NE2 HID A 118      13.396 -15.743  15.515
ATOM   1981  CD2 HID A 118      12.696 -14.587  15.882
ATOM   1982  HD2 HID A 118      12.177 -14.429  16.817
ATOM   1983  C   HID A 118      14.765 -11.671  16.037
ATOM   1984  O   HID A 118      15.278 -12.669  16.548
ATOM   1985  N   SER A 119      15.519 -10.728  15.455
ATOM   1986  H   SER A 119      15.051  -9.931  15.042
ATOM   1987  CA  SER A 119      16.980 -10.814  15.327
ATOM   1988  HA  SER A 119      17.268 -11.859  15.248
ATOM   1989  CB  SER A 119      17.460 -10.117  14.051
ATOM   1990  HB2 SER A 119      17.244  -9.051  14.106
ATOM   1991  HB3 SER A 119      18.539 -10.251  13.954
ATOM   1992  OG  SER A 119      16.823 -10.685  12.917
ATOM   1993  HG  SER A 119      15.914 -10.279  12.846
ATOM   1994  C   SER A 119      17.748 -10.269  16.532
ATOM   1995  O   SER A 119      18.897 -10.671  16.709
ATOM   1996  N   ARG A 120      17.138  -9.410  17.362
ATOM   1997  H   ARG A 120      16.250  -9.023  17.045
ATOM   1998  CA  ARG A 120      17.784  -8.763  18.515
ATOM   1999  HA  ARG A 120      18.748  -9.247  18.690
ATOM   2000  CB  ARG A 120      18.070  -7.275  18.205
ATOM   2001  HB2 ARG A 120      17.124  -6.772  17.994
ATOM   2002  HB3 ARG A 120      18.514  -6.806  19.085
ATOM   2003  CG  ARG A 120      19.033  -7.070  17.017
ATOM   2004  HG2 ARG A 120      19.995  -7.537  17.236
ATOM   2005  HG3 ARG A 120      18.612  -7.564  16.142
ATOM   2006  CD  ARG A 120      19.236  -5.590  16.639
ATOM   2007  HD2 ARG A 120      19.234  -5.525  15.549
ATOM   2008  HD3 ARG A 120      18.399  -4.996  16.997
ATOM   2009  NE  ARG A 120      20.514  -5.019  17.095
ATOM   2010  HE  ARG A 120      21.338  -5.259  16.556
ATOM   2011  CZ  ARG A 120      20.730  -4.133  18.056
ATOM   2012  NH1 ARG A 120      19.841  -3.696  18.900
ATOM   2013  HH11ARG A 120      20.179  -3.023  19.594
ATOM   2014  HH12ARG A 120      18.889  -4.052  18.931
ATOM   2015  NH2 ARG A 120      21.914  -3.620  18.200
ATOM   2016  HH21ARG A 120      22.051  -2.941  18.954
ATOM   2017  HH22ARG A 120      22.656  -3.917  17.582
ATOM   2018  C   ARG A 120      17.005  -8.945  19.827
ATOM   2019  O   ARG A 120      17.542  -8.578  20.867
ATOM   2020  N   HID A 121      15.818  -9.569  19.823
ATOM   2021  H   HID A 121      15.365  -9.750  18.933
ATOM   2022  CA  HID A 121      15.081  -9.997  21.025
ATOM   2023  HA  HID A 121      15.775  -9.990  21.866
ATOM   2024  CB  HID A 121      13.962  -8.994  21.355
ATOM   2025  HB2 HID A 121      13.208  -9.015  20.568
ATOM   2026  HB3 HID A 121      13.483  -9.292  22.281
ATOM   2027  CG  HID A 121      14.441  -7.590  21.538
ATOM   2028  ND1 HID A 121      15.474  -7.180  22.346
ATOM   2029  HD1 HID A 121      16.018  -7.757  22.986
ATOM   2030  CE1 HID A 121      15.695  -5.887  22.080
ATOM   2031  HE1 HID A 121      16.494  -5.298  22.502
ATOM   2032  NE2 HID A 121      14.796  -5.419  21.205
ATOM   2033  CD2 HID A 121      14.004  -6.502  20.841
ATOM   2034  HD2 HID A 121      13.229  -6.501  20.094
ATOM   2035  C   HID A 121      14.524 -11.439  20.953
ATOM   2036  O   HID A 121      13.388 -11.669  21.385
ATOM   2037  N   PRO A 122      15.280 -12.458  20.491
ATOM   2038  CD  PRO A 122      16.648 -12.394  19.994
ATOM   2039  HD2 PRO A 122      17.270 -11.719  20.582
ATOM   2040  HD3 PRO A 122      16.639 -12.082  18.948
ATOM   2041  CG  PRO A 122      17.191 -13.811  20.093
ATOM   2042  HG2 PRO A 122      17.584 -13.980  21.097
ATOM   2043  HG3 PRO A 122      17.955 -13.995  19.339
ATOM   2044  CB  PRO A 122      15.944 -14.666  19.877
ATOM   2045  HB2 PRO A 122      16.055 -15.663  20.306
ATOM   2046  HB3 PRO A 122      15.736 -14.732  18.809
ATOM   2047  CA  PRO A 122      14.830 -13.855  20.544
ATOM   2048  HA  PRO A 122      13.923 -13.959  19.946
ATOM   2049  C   PRO A 122      14.502 -14.357  21.967
ATOM   2050  O   PRO A 122      13.786 -15.354  22.112
ATOM   2051  N   GLY A 123      14.950 -13.659  23.023
ATOM   2052  H   GLY A 123      15.591 -12.891  22.848
ATOM   2053  CA  GLY A 123      14.556 -13.908  24.415
ATOM   2054  HA2 GLY A 123      14.544 -14.979  24.603
ATOM   2055  HA3 GLY A 123      15.304 -13.454  25.065
ATOM   2056  C   GLY A 123      13.187 -13.338  24.821
ATOM   2057  O   GLY A 123      12.617 -13.761  25.833
ATOM   2058  N   ASP A 124      12.614 -12.421  24.032
ATOM   2059  H   ASP A 124      13.118 -12.127  23.197
ATOM   2060  CA  ASP A 124      11.430 -11.642  24.414
ATOM   2061  HA  ASP A 124      10.934 -12.114  25.262
ATOM   2062  CB  ASP A 124      11.885 -10.244  24.856
ATOM   2063  HB2 ASP A 124      12.471  -9.777  24.072
ATOM   2064  HB3 ASP A 124      11.008  -9.617  25.028
ATOM   2065  CG  ASP A 124      12.702 -10.291  26.141
ATOM   2066  OD1 ASP A 124      12.102 -10.040  27.208
ATOM   2067  OD2 ASP A 124      13.930 -10.560  26.109
ATOM   2068  C   ASP A 124      10.365 -11.535  23.311
ATOM   2069  O   ASP A 124       9.288 -11.000  23.574
ATOM   2070  N   PHE A 125      10.623 -12.060  22.108
ATOM   2071  H   PHE A 125      11.556 -12.421  21.948
ATOM   2072  CA  PHE A 125       9.793 -11.868  20.920
ATOM   2073  HA  PHE A 125       8.865 -11.388  21.224
ATOM   2074  CB  PHE A 125      10.521 -10.904  19.968
ATOM   2075  HB2 PHE A 125      10.913 -10.071  20.553
ATOM   2076  HB3 PHE A 125      11.380 -11.412  19.527
ATOM   2077  CG  PHE A 125       9.660 -10.314  18.867
ATOM   2078  CD1 PHE A 125       8.632  -9.412  19.193
ATOM   2079  HD1 PHE A 125       8.428  -9.182  20.226
ATOM   2080  CE1 PHE A 125       7.879  -8.801  18.177
ATOM   2081  HE1 PHE A 125       7.093  -8.109  18.439
ATOM   2082  CZ  PHE A 125       8.162  -9.072  16.828
ATOM   2083  HZ  PHE A 125       7.593  -8.588  16.048
ATOM   2084  CE2 PHE A 125       9.184  -9.978  16.497
ATOM   2085  HE2 PHE A 125       9.401 -10.194  15.460
ATOM   2086  CD2 PHE A 125       9.914 -10.615  17.517
ATOM   2087  HD2 PHE A 125      10.679 -11.331  17.265
ATOM   2088  C   PHE A 125       9.400 -13.203  20.267
ATOM   2089  O   PHE A 125       9.741 -13.468  19.114
ATOM   2090  N   GLY A 126       8.684 -14.057  21.009
ATOM   2091  H   GLY A 126       8.421 -13.789  21.956
ATOM   2092  CA  GLY A 126       8.077 -15.282  20.479
ATOM   2093  HA2 GLY A 126       8.821 -15.824  19.896
ATOM   2094  HA3 GLY A 126       7.766 -15.917  21.309
ATOM   2095  C   GLY A 126       6.854 -15.002  19.593
ATOM   2096  O   GLY A 126       6.463 -13.849  19.399
ATOM   2097  N   ALA A 127       6.225 -16.051  19.046
ATOM   2098  H   ALA A 127       6.592 -16.978  19.212
ATOM   2099  CA  ALA A 127       5.091 -15.916  18.119
ATOM   2100  HA  ALA A 127       5.453 -15.386  17.248
ATOM   2101  CB  ALA A 127       4.636 -17.287  17.632
ATOM   2102  HB1 ALA A 127       5.488 -17.784  17.178
ATOM   2103  HB2 ALA A 127       3.859 -17.172  16.876
ATOM   2104  HB3 ALA A 127       4.249 -17.877  18.462
ATOM   2105  C   ALA A 127       3.903 -15.129  18.695
ATOM   2106  O   ALA A 127       3.210 -14.422  17.963
ATOM   2107  N   ASP A 128       3.691 -15.217  20.007
ATOM   2108  H   ASP A 128       4.289 -15.847  20.534
ATOM   2109  CA  ASP A 128       2.768 -14.395  20.788
ATOM   2110  HA  ASP A 128       1.751 -14.610  20.455
ATOM   2111  CB  ASP A 128       2.873 -14.821  22.270
ATOM   2112  HB2 ASP A 128       2.484 -14.030  22.910
ATOM   2113  HB3 ASP A 128       2.232 -15.693  22.410
ATOM   2114  CG  ASP A 128       4.291 -15.211  22.716
ATOM   2115  OD1 ASP A 128       4.741 -16.329  22.347
ATOM   2116  OD2 ASP A 128       4.959 -14.417  23.423
ATOM   2117  C   ASP A 128       2.984 -12.882  20.584
ATOM   2118  O   ASP A 128       2.003 -12.141  20.454
ATOM   2119  N   ALA A 129       4.242 -12.431  20.472
ATOM   2120  H   ALA A 129       5.004 -13.102  20.508
ATOM   2121  CA  ALA A 129       4.598 -11.038  20.204
ATOM   2122  HA  ALA A 129       3.805 -10.388  20.575
ATOM   2123  CB  ALA A 129       5.871 -10.712  20.989
ATOM   2124  HB1 ALA A 129       6.700 -11.307  20.606
ATOM   2125  HB2 ALA A 129       5.725 -10.945  22.045
ATOM   2126  HB3 ALA A 129       6.102  -9.652  20.886
ATOM   2127  C   ALA A 129       4.778 -10.751  18.700
ATOM   2128  O   ALA A 129       4.410  -9.669  18.241
ATOM   2129  N   GLN A 130       5.257 -11.730  17.911
ATOM   2130  H   GLN A 130       5.611 -12.572  18.362
ATOM   2131  CA  GLN A 130       5.303 -11.662  16.436
ATOM   2132  HA  GLN A 130       5.842 -10.756  16.156
ATOM   2133  CB  GLN A 130       6.056 -12.868  15.840
ATOM   2134  HB2 GLN A 130       5.504 -13.764  16.095
ATOM   2135  HB3 GLN A 130       6.043 -12.787  14.752
ATOM   2136  CG  GLN A 130       7.526 -13.000  16.283
ATOM   2137  HG2 GLN A 130       8.116 -12.268  15.737
ATOM   2138  HG3 GLN A 130       7.618 -12.778  17.345
ATOM   2139  CD  GLN A 130       8.136 -14.379  16.021
ATOM   2140  OE1 GLN A 130       7.836 -15.059  15.040
ATOM   2141  NE2 GLN A 130       9.032 -14.842  16.870
ATOM   2142  HE21GLN A 130       9.427 -15.775  16.725
ATOM   2143  HE22GLN A 130       9.307 -14.291  17.690
ATOM   2144  C   GLN A 130       3.899 -11.566  15.798
ATOM   2145  O   GLN A 130       3.784 -11.245  14.614
ATOM   2146  N   GLY A 131       2.827 -11.815  16.561
ATOM   2147  H   GLY A 131       2.979 -12.244  17.466
ATOM   2148  CA  GLY A 131       1.461 -11.442  16.187
ATOM   2149  HA2 GLY A 131       1.345 -11.442  15.104
ATOM   2150  HA3 GLY A 131       0.768 -12.173  16.599
ATOM   2151  C   GLY A 131       1.072 -10.062  16.724
ATOM   2152  O   GLY A 131       0.661  -9.199  15.947
ATOM   2153  N   ALA A 132       1.238  -9.822  18.034
ATOM   2154  H   ALA A 132       1.590 -10.555  18.634
ATOM   2155  CA  ALA A 132       0.820  -8.569  18.665
ATOM   2156  HA  ALA A 132      -0.254  -8.455  18.510
ATOM   2157  CB  ALA A 132       1.059  -8.671  20.176
ATOM   2158  HB1 ALA A 132       0.633  -7.799  20.672
ATOM   2159  HB2 ALA A 132       2.128  -8.717  20.389
ATOM   2160  HB3 ALA A 132       0.571  -9.562  20.572
ATOM   2161  C   ALA A 132       1.501  -7.324  18.060
ATOM   2162  O   ALA A 132       0.831  -6.324  17.803
ATOM   2163  N   MET A 133       2.806  -7.377  17.764
ATOM   2164  H   MET A 133       3.330  -8.228  17.966
ATOM   2165  CA  MET A 133       3.513  -6.238  17.165
ATOM   2166  HA  MET A 133       3.281  -5.350  17.753
ATOM   2167  CB  MET A 133       5.027  -6.483  17.236
ATOM   2168  HB2 MET A 133       5.280  -6.784  18.254
ATOM   2169  HB3 MET A 133       5.300  -7.292  16.555
ATOM   2170  CG  MET A 133       5.849  -5.234  16.896
ATOM   2171  HG2 MET A 133       6.904  -5.511  16.889
ATOM   2172  HG3 MET A 133       5.586  -4.890  15.896
ATOM   2173  SD  MET A 133       5.627  -3.868  18.068
ATOM   2174  CE  MET A 133       6.780  -2.654  17.383
ATOM   2175  HE1 MET A 133       7.778  -3.089  17.332
ATOM   2176  HE2 MET A 133       6.808  -1.777  18.028
ATOM   2177  HE3 MET A 133       6.452  -2.359  16.387
ATOM   2178  C   MET A 133       3.047  -5.962  15.729
ATOM   2179  O   MET A 133       2.814  -4.804  15.376
ATOM   2180  N   ASN A 134       2.837  -7.014  14.922
ATOM   2181  H   ASN A 134       2.976  -7.944  15.291
ATOM   2182  CA  ASN A 134       2.318  -6.883  13.559
ATOM   2183  HA  ASN A 134       3.004  -6.254  12.990
ATOM   2184  CB  ASN A 134       2.256  -8.274  12.898
ATOM   2185  HB2 ASN A 134       3.203  -8.793  13.051
ATOM   2186  HB3 ASN A 134       1.471  -8.875  13.361
ATOM   2187  CG  ASN A 134       2.014  -8.195  11.395
ATOM   2188  OD1 ASN A 134       2.902  -7.865  10.609
ATOM   2189  ND2 ASN A 134       0.809  -8.459  10.928
ATOM   2190  HD21ASN A 134       0.684  -8.449   9.920
ATOM   2191  HD22ASN A 134       0.018  -8.706  11.521
ATOM   2192  C   ASN A 134       0.950  -6.183  13.545
ATOM   2193  O   ASN A 134       0.676  -5.404  12.631
ATOM   2194  N   LYS A 135       0.125  -6.441  14.571
ATOM   2195  H   LYS A 135       0.422  -7.151  15.234
ATOM   2196  CA  LYS A 135      -1.200  -5.846  14.785
ATOM   2197  HA  LYS A 135      -1.752  -5.824  13.845
ATOM   2198  CB  LYS A 135      -1.964  -6.722  15.780
ATOM   2199  HB2 LYS A 135      -1.364  -6.876  16.676
ATOM   2200  HB3 LYS A 135      -2.892  -6.223  16.065
ATOM   2201  CG  LYS A 135      -2.318  -8.071  15.157
ATOM   2202  HG2 LYS A 135      -3.129  -7.905  14.454
ATOM   2203  HG3 LYS A 135      -1.472  -8.501  14.622
ATOM   2204  CD  LYS A 135      -2.764  -9.042  16.240
ATOM   2205  HD2 LYS A 135      -1.917  -9.316  16.869
ATOM   2206  HD3 LYS A 135      -3.518  -8.559  16.856
ATOM   2207  CE  LYS A 135      -3.333 -10.285  15.568
ATOM   2208  HE2 LYS A 135      -4.104  -9.987  14.851
ATOM   2209  HE3 LYS A 135      -2.531 -10.790  15.023
ATOM   2210  NZ  LYS A 135      -3.911 -11.196  16.570
ATOM   2211  HZ1 LYS A 135      -3.258 -11.361  17.337
ATOM   2212  HZ2 LYS A 135      -4.125 -12.099  16.151
ATOM   2213  HZ3 LYS A 135      -4.744 -10.788  16.999
ATOM   2214  C   LYS A 135      -1.152  -4.416  15.317
ATOM   2215  O   LYS A 135      -1.914  -3.576  14.845
ATOM   2216  N   ALA A 136      -0.259  -4.110  16.265
ATOM   2217  H   ALA A 136       0.301  -4.855  16.675
ATOM   2218  CA  ALA A 136      -0.104  -2.746  16.770
ATOM   2219  HA  ALA A 136      -1.074  -2.389  17.122
ATOM   2220  CB  ALA A 136       0.862  -2.759  17.951
ATOM   2221  HB1 ALA A 136       0.852  -1.780  18.422
ATOM   2222  HB2 ALA A 136       1.872  -3.009  17.622
ATOM   2223  HB3 ALA A 136       0.531  -3.494  18.678
ATOM   2224  C   ALA A 136       0.378  -1.796  15.665
ATOM   2225  O   ALA A 136      -0.151  -0.692  15.511
ATOM   2226  N   LEU A 137       1.320  -2.272  14.840
ATOM   2227  H   LEU A 137       1.744  -3.173  15.053
ATOM   2228  CA  LEU A 137       1.720  -1.601  13.609
ATOM   2229  HA  LEU A 137       2.034  -0.587  13.856
ATOM   2230  CB  LEU A 137       2.917  -2.355  13.002
ATOM   2231  HB2 LEU A 137       2.651  -3.408  12.902
ATOM   2232  HB3 LEU A 137       3.108  -1.963  12.005
ATOM   2233  CG  LEU A 137       4.205  -2.221  13.843
ATOM   2234  HG  LEU A 137       3.975  -2.333  14.902
ATOM   2235  CD1 LEU A 137       5.210  -3.311  13.467
ATOM   2236  HD11LEU A 137       5.468  -3.237  12.419
ATOM   2237  HD12LEU A 137       4.777  -4.293  13.654
ATOM   2238  HD13LEU A 137       6.110  -3.206  14.068
ATOM   2239  CD2 LEU A 137       4.870  -0.863  13.625
ATOM   2240  HD21LEU A 137       5.761  -0.792  14.245
ATOM   2241  HD22LEU A 137       4.190  -0.060  13.905
ATOM   2242  HD23LEU A 137       5.154  -0.744  12.579
ATOM   2243  C   LEU A 137       0.540  -1.484  12.627
ATOM   2244  O   LEU A 137       0.346  -0.420  12.049
ATOM   2245  N   GLU A 138      -0.287  -2.525  12.477
ATOM   2246  H   GLU A 138      -0.058  -3.394  12.943
ATOM   2247  CA  GLU A 138      -1.490  -2.498  11.631
ATOM   2248  HA  GLU A 138      -1.174  -2.258  10.616
ATOM   2249  CB  GLU A 138      -2.164  -3.878  11.634
ATOM   2250  HB2 GLU A 138      -1.449  -4.631  11.929
ATOM   2251  HB3 GLU A 138      -2.982  -3.908  12.355
ATOM   2252  CG  GLU A 138      -2.696  -4.249  10.254
ATOM   2253  HG2 GLU A 138      -3.565  -3.629  10.031
ATOM   2254  HG3 GLU A 138      -1.953  -4.043   9.493
ATOM   2255  CD  GLU A 138      -3.054  -5.731  10.185
ATOM   2256  OE1 GLU A 138      -4.255  -5.994   9.908
ATOM   2257  OE2 GLU A 138      -2.157  -6.614  10.329
ATOM   2258  C   GLU A 138      -2.519  -1.444  12.053
ATOM   2259  O   GLU A 138      -3.117  -0.801  11.186
ATOM   2260  N   LEU A 139      -2.705  -1.267  13.369
ATOM   2261  H   LEU A 139      -2.243  -1.926  13.995
ATOM   2262  CA  LEU A 139      -3.527  -0.219  13.972
ATOM   2263  HA  LEU A 139      -4.527  -0.273  13.539
ATOM   2264  CB  LEU A 139      -3.625  -0.489  15.488
ATOM   2265  HB2 LEU A 139      -3.830  -1.553  15.624
ATOM   2266  HB3 LEU A 139      -2.661  -0.284  15.952
ATOM   2267  CG  LEU A 139      -4.717   0.286  16.256
ATOM   2268  HG  LEU A 139      -5.694  -0.024  15.886
ATOM   2269  CD1 LEU A 139      -4.615  -0.082  17.738
ATOM   2270  HD11LEU A 139      -5.454   0.355  18.278
ATOM   2271  HD12LEU A 139      -3.682   0.300  18.150
ATOM   2272  HD13LEU A 139      -4.642  -1.166  17.849
ATOM   2273  CD2 LEU A 139      -4.609   1.811  16.149
ATOM   2274  HD21LEU A 139      -5.216   2.286  16.920
ATOM   2275  HD22LEU A 139      -4.995   2.144  15.186
ATOM   2276  HD23LEU A 139      -3.574   2.126  16.260
ATOM   2277  C   LEU A 139      -2.935   1.160  13.655
ATOM   2278  O   LEU A 139      -3.616   1.987  13.051
ATOM   2279  N   PHE A 140      -1.655   1.392  13.975
ATOM   2280  H   PHE A 140      -1.137   0.663  14.465
ATOM   2281  CA  PHE A 140      -0.936   2.621  13.606
ATOM   2282  HA  PHE A 140      -1.349   3.451  14.181
ATOM   2283  CB  PHE A 140       0.540   2.448  14.013
ATOM   2284  HB2 PHE A 140       0.640   2.720  15.064
ATOM   2285  HB3 PHE A 140       0.803   1.393  13.944
ATOM   2286  CG  PHE A 140       1.566   3.227  13.210
ATOM   2287  CD1 PHE A 140       1.664   4.624  13.337
ATOM   2288  HD1 PHE A 140       0.983   5.156  13.984
ATOM   2289  CE1 PHE A 140       2.654   5.329  12.630
ATOM   2290  HE1 PHE A 140       2.743   6.400  12.740
ATOM   2291  CZ  PHE A 140       3.528   4.646  11.768
ATOM   2292  HZ  PHE A 140       4.284   5.196  11.224
ATOM   2293  CE2 PHE A 140       3.422   3.252  11.624
ATOM   2294  HE2 PHE A 140       4.100   2.720  10.973
ATOM   2295  CD2 PHE A 140       2.449   2.543  12.349
ATOM   2296  HD2 PHE A 140       2.389   1.469  12.251
ATOM   2297  C   PHE A 140      -1.120   2.958  12.109
ATOM   2298  O   PHE A 140      -1.561   4.051  11.745
ATOM   2299  N   ARG A 141      -0.907   1.973  11.237
ATOM   2300  H   ARG A 141      -0.561   1.090  11.603
ATOM   2301  CA  ARG A 141      -1.125   2.086   9.797
ATOM   2302  HA  ARG A 141      -0.599   2.979   9.454
ATOM   2303  CB  ARG A 141      -0.507   0.878   9.075
ATOM   2304  HB2 ARG A 141      -0.900  -0.043   9.512
ATOM   2305  HB3 ARG A 141      -0.809   0.904   8.029
ATOM   2306  CG  ARG A 141       1.034   0.876   9.133
ATOM   2307  HG2 ARG A 141       1.402   1.864   8.856
ATOM   2308  HG3 ARG A 141       1.365   0.684  10.149
ATOM   2309  CD  ARG A 141       1.689  -0.156   8.205
ATOM   2310  HD2 ARG A 141       1.745   0.274   7.204
ATOM   2311  HD3 ARG A 141       2.706  -0.349   8.548
ATOM   2312  NE  ARG A 141       0.927  -1.409   8.108
ATOM   2313  HE  ARG A 141       0.146  -1.415   7.466
ATOM   2314  CZ  ARG A 141       1.112  -2.557   8.734
ATOM   2315  NH1 ARG A 141       2.089  -2.829   9.558
ATOM   2316  HH11ARG A 141       2.265  -3.813   9.734
ATOM   2317  HH12ARG A 141       2.804  -2.142   9.752
ATOM   2318  NH2 ARG A 141       0.267  -3.509   8.469
ATOM   2319  HH21ARG A 141       0.264  -4.371   9.007
ATOM   2320  HH22ARG A 141      -0.439  -3.346   7.747
ATOM   2321  C   ARG A 141      -2.596   2.263   9.368
ATOM   2322  O   ARG A 141      -2.803   2.662   8.222
ATOM   2323  N   LYS A 142      -3.613   2.020  10.214
ATOM   2324  H   LYS A 142      -3.400   1.672  11.146
ATOM   2325  CA  LYS A 142      -5.033   2.268   9.873
ATOM   2326  HA  LYS A 142      -5.114   2.304   8.787
ATOM   2327  CB  LYS A 142      -5.949   1.105  10.309
ATOM   2328  HB2 LYS A 142      -6.715   1.005   9.540
ATOM   2329  HB3 LYS A 142      -5.380   0.177  10.313
ATOM   2330  CG  LYS A 142      -6.683   1.237  11.656
ATOM   2331  HG2 LYS A 142      -5.974   1.394  12.464
ATOM   2332  HG3 LYS A 142      -7.368   2.082  11.611
ATOM   2333  CD  LYS A 142      -7.483  -0.046  11.925
ATOM   2334  HD2 LYS A 142      -8.128  -0.253  11.069
ATOM   2335  HD3 LYS A 142      -6.787  -0.879  12.034
ATOM   2336  CE  LYS A 142      -8.362   0.017  13.177
ATOM   2337  HE2 LYS A 142      -8.791  -0.977  13.330
ATOM   2338  HE3 LYS A 142      -7.752   0.258  14.054
ATOM   2339  NZ  LYS A 142      -9.460   0.998  13.035
ATOM   2340  HZ1 LYS A 142     -10.261   0.700  13.590
ATOM   2341  HZ2 LYS A 142      -9.773   1.107  12.067
ATOM   2342  HZ3 LYS A 142      -9.182   1.915  13.382
ATOM   2343  C   LYS A 142      -5.535   3.628  10.353
ATOM   2344  O   LYS A 142      -6.560   4.113   9.869
ATOM   2345  N   ASP A 143      -4.804   4.268  11.268
ATOM   2346  H   ASP A 143      -4.037   3.762  11.700
ATOM   2347  CA  ASP A 143      -5.128   5.604  11.770
ATOM   2348  HA  ASP A 143      -6.151   5.860  11.502
ATOM   2349  CB  ASP A 143      -5.058   5.627  13.302
ATOM   2350  HB2 ASP A 143      -4.187   5.069  13.651
ATOM   2351  HB3 ASP A 143      -4.958   6.666  13.609
ATOM   2352  CG  ASP A 143      -6.333   5.082  13.954
ATOM   2353  OD1 ASP A 143      -6.983   4.153  13.413
ATOM   2354  OD2 ASP A 143      -6.773   5.667  14.973
ATOM   2355  C   ASP A 143      -4.273   6.687  11.105
ATOM   2356  O   ASP A 143      -4.822   7.729  10.741
ATOM   2357  N   ILE A 144      -3.001   6.412  10.798
ATOM   2358  H   ILE A 144      -2.588   5.557  11.162
ATOM   2359  CA  ILE A 144      -2.256   7.208   9.810
ATOM   2360  HA  ILE A 144      -2.209   8.237  10.164
ATOM   2361  CB  ILE A 144      -0.807   6.688   9.647
ATOM   2362  HB  ILE A 144      -0.852   5.633   9.367
ATOM   2363  CG2 ILE A 144      -0.097   7.443   8.515
ATOM   2364  HG21ILE A 144      -0.499   7.137   7.551
ATOM   2365  HG22ILE A 144       0.970   7.223   8.525
ATOM   2366  HG23ILE A 144      -0.237   8.517   8.630
ATOM   2367  CG1 ILE A 144       0.062   6.788  10.922
ATOM   2368  HG12ILE A 144      -0.419   6.249  11.735
ATOM   2369  HG13ILE A 144       1.006   6.284  10.714
ATOM   2370  CD1 ILE A 144       0.380   8.202  11.424
ATOM   2371  HD11ILE A 144      -0.535   8.674  11.775
ATOM   2372  HD12ILE A 144       0.843   8.803  10.643
ATOM   2373  HD13ILE A 144       1.083   8.141  12.254
ATOM   2374  C   ILE A 144      -3.015   7.229   8.464
ATOM   2375  O   ILE A 144      -3.261   8.300   7.914
ATOM   2376  N   ALA A 145      -3.489   6.077   7.972
ATOM   2377  H   ALA A 145      -3.251   5.218   8.447
ATOM   2378  CA  ALA A 145      -4.251   5.981   6.718
ATOM   2379  HA  ALA A 145      -3.648   6.414   5.920
ATOM   2380  CB  ALA A 145      -4.483   4.510   6.387
ATOM   2381  HB1 ALA A 145      -4.996   4.434   5.431
ATOM   2382  HB2 ALA A 145      -5.094   4.042   7.159
ATOM   2383  HB3 ALA A 145      -3.535   3.991   6.314
ATOM   2384  C   ALA A 145      -5.606   6.697   6.721
ATOM   2385  O   ALA A 145      -6.067   7.141   5.667
ATOM   2386  N   ALA A 146      -6.287   6.785   7.868
ATOM   2387  H   ALA A 146      -5.923   6.341   8.700
ATOM   2388  CA  ALA A 146      -7.530   7.543   7.967
ATOM   2389  HA  ALA A 146      -8.178   7.284   7.129
ATOM   2390  CB  ALA A 146      -8.246   7.151   9.255
ATOM   2391  HB1 ALA A 146      -8.506   6.093   9.215
ATOM   2392  HB2 ALA A 146      -9.162   7.733   9.365
ATOM   2393  HB3 ALA A 146      -7.594   7.338  10.108
ATOM   2394  C   ALA A 146      -7.262   9.052   7.909
ATOM   2395  O   ALA A 146      -8.043   9.781   7.290
ATOM   2396  N   LYS A 147      -6.145   9.503   8.499
ATOM   2397  H   LYS A 147      -5.557   8.827   8.982
ATOM   2398  CA  LYS A 147      -5.638  10.874   8.390
ATOM   2399  HA  LYS A 147      -6.451  11.577   8.570
ATOM   2400  CB  LYS A 147      -4.533  11.103   9.442
ATOM   2401  HB2 LYS A 147      -4.110  10.148   9.753
ATOM   2402  HB3 LYS A 147      -3.729  11.674   8.977
ATOM   2403  CG  LYS A 147      -4.973  11.890  10.692
ATOM   2404  HG2 LYS A 147      -4.187  11.795  11.443
ATOM   2405  HG3 LYS A 147      -5.029  12.944  10.415
ATOM   2406  CD  LYS A 147      -6.317  11.520  11.345
ATOM   2407  HD2 LYS A 147      -6.419  12.122  12.250
ATOM   2408  HD3 LYS A 147      -7.130  11.798  10.674
ATOM   2409  CE  LYS A 147      -6.466  10.041  11.725
ATOM   2410  HE2 LYS A 147      -6.408   9.432  10.825
ATOM   2411  HE3 LYS A 147      -5.645   9.745  12.382
ATOM   2412  NZ  LYS A 147      -7.763   9.811  12.397
ATOM   2413  HZ1 LYS A 147      -8.001   8.820  12.460
ATOM   2414  HZ2 LYS A 147      -8.514  10.294  11.903
ATOM   2415  HZ3 LYS A 147      -7.726  10.223  13.333
ATOM   2416  C   LYS A 147      -5.155  11.168   6.967
ATOM   2417  O   LYS A 147      -5.517  12.206   6.432
ATOM   2418  N   TYR A 148      -4.448  10.246   6.297
ATOM   2419  H   TYR A 148      -4.096   9.443   6.809
ATOM   2420  CA  TYR A 148      -4.114  10.380   4.869
ATOM   2421  HA  TYR A 148      -3.481  11.259   4.734
ATOM   2422  CB  TYR A 148      -3.358   9.151   4.339
ATOM   2423  HB2 TYR A 148      -3.909   8.254   4.613
ATOM   2424  HB3 TYR A 148      -3.373   9.208   3.251
ATOM   2425  CG  TYR A 148      -1.903   8.944   4.720
ATOM   2426  CD1 TYR A 148      -1.246   9.700   5.713
ATOM   2427  HD1 TYR A 148      -1.768  10.470   6.261
ATOM   2428  CE1 TYR A 148       0.106   9.447   6.014
ATOM   2429  HE1 TYR A 148       0.599  10.019   6.783
ATOM   2430  CZ  TYR A 148       0.793   8.416   5.356
ATOM   2431  OH  TYR A 148       2.062   8.082   5.716
ATOM   2432  HH  TYR A 148       2.374   8.570   6.479
ATOM   2433  CE2 TYR A 148       0.147   7.673   4.363
ATOM   2434  HE2 TYR A 148       0.685   6.885   3.861
ATOM   2435  CD2 TYR A 148      -1.192   7.941   4.035
ATOM   2436  HD2 TYR A 148      -1.678   7.359   3.266
ATOM   2437  C   TYR A 148      -5.371  10.586   4.016
ATOM   2438  O   TYR A 148      -5.354  11.410   3.100
ATOM   2439  N   LYS A 149      -6.466   9.871   4.315
ATOM   2440  H   LYS A 149      -6.383   9.119   4.994
ATOM   2441  CA  LYS A 149      -7.766  10.099   3.673
ATOM   2442  HA  LYS A 149      -7.592  10.139   2.598
ATOM   2443  CB  LYS A 149      -8.722   8.926   3.983
ATOM   2444  HB2 LYS A 149      -8.154   8.073   4.356
ATOM   2445  HB3 LYS A 149      -9.416   9.219   4.773
ATOM   2446  CG  LYS A 149      -9.534   8.439   2.771
ATOM   2447  HG2 LYS A 149     -10.230   7.674   3.120
ATOM   2448  HG3 LYS A 149     -10.111   9.269   2.364
ATOM   2449  CD  LYS A 149      -8.660   7.834   1.658
ATOM   2450  HD2 LYS A 149      -8.099   8.627   1.164
ATOM   2451  HD3 LYS A 149      -7.964   7.113   2.090
ATOM   2452  CE  LYS A 149      -9.527   7.128   0.614
ATOM   2453  HE2 LYS A 149     -10.006   6.262   1.080
ATOM   2454  HE3 LYS A 149     -10.309   7.815   0.281
ATOM   2455  NZ  LYS A 149      -8.727   6.696  -0.554
ATOM   2456  HZ1 LYS A 149      -9.325   6.251  -1.248
ATOM   2457  HZ2 LYS A 149      -7.988   6.040  -0.304
ATOM   2458  HZ3 LYS A 149      -8.312   7.501  -1.034
ATOM   2459  C   LYS A 149      -8.355  11.469   4.040
ATOM   2460  O   LYS A 149      -8.685  12.228   3.128
ATOM   2461  N   GLU A 150      -8.415  11.837   5.327
ATOM   2462  H   GLU A 150      -8.131  11.160   6.030
ATOM   2463  CA  GLU A 150      -8.879  13.161   5.799
ATOM   2464  HA  GLU A 150      -9.817  13.364   5.279
ATOM   2465  CB  GLU A 150      -9.175  13.146   7.321
ATOM   2466  HB2 GLU A 150      -8.753  12.258   7.789
ATOM   2467  HB3 GLU A 150      -8.729  14.016   7.803
ATOM   2468  CG  GLU A 150     -10.692  13.184   7.559
ATOM   2469  HG2 GLU A 150     -11.102  14.068   7.066
ATOM   2470  HG3 GLU A 150     -11.134  12.313   7.079
ATOM   2471  CD  GLU A 150     -11.088  13.226   9.043
ATOM   2472  OE1 GLU A 150     -11.222  14.347   9.593
ATOM   2473  OE2 GLU A 150     -11.372  12.155   9.650
ATOM   2474  C   GLU A 150      -7.966  14.346   5.412
ATOM   2475  O   GLU A 150      -8.322  15.500   5.672
ATOM   2476  N   LEU A 151      -6.835  14.088   4.744
ATOM   2477  H   LEU A 151      -6.524  13.124   4.753
ATOM   2478  CA  LEU A 151      -5.906  15.070   4.173
ATOM   2479  HA  LEU A 151      -6.281  16.077   4.348
ATOM   2480  CB  LEU A 151      -4.545  14.938   4.880
ATOM   2481  HB2 LEU A 151      -4.210  13.904   4.784
ATOM   2482  HB3 LEU A 151      -3.813  15.567   4.372
ATOM   2483  CG  LEU A 151      -4.558  15.332   6.371
ATOM   2484  HG  LEU A 151      -5.350  14.804   6.899
ATOM   2485  CD1 LEU A 151      -3.222  14.928   6.988
ATOM   2486  HD11LEU A 151      -3.191  15.224   8.036
ATOM   2487  HD12LEU A 151      -2.431  15.422   6.430
ATOM   2488  HD13LEU A 151      -3.098  13.848   6.916
ATOM   2489  CD2 LEU A 151      -4.754  16.839   6.573
ATOM   2490  HD21LEU A 151      -5.736  17.142   6.209
ATOM   2491  HD22LEU A 151      -3.982  17.397   6.043
ATOM   2492  HD23LEU A 151      -4.701  17.080   7.635
ATOM   2493  C   LEU A 151      -5.759  14.928   2.644
ATOM   2494  O   LEU A 151      -4.951  15.640   2.044
ATOM   2495  N   GLY A 152      -6.520  14.030   2.003
ATOM   2496  H   GLY A 152      -7.159  13.473   2.560
ATOM   2497  CA  GLY A 152      -6.596  13.873   0.546
ATOM   2498  HA2 GLY A 152      -7.572  13.456   0.296
ATOM   2499  HA3 GLY A 152      -6.527  14.858   0.083
ATOM   2500  C   GLY A 152      -5.519  12.978  -0.089
ATOM   2501  O   GLY A 152      -5.700  12.544  -1.235
ATOM   2502  N   TYR A 153      -4.425  12.663   0.617
ATOM   2503  H   TYR A 153      -4.372  12.975   1.579
ATOM   2504  CA  TYR A 153      -3.316  11.856   0.090
ATOM   2505  HA  TYR A 153      -3.036  12.270  -0.878
ATOM   2506  CB  TYR A 153      -2.097  11.973   1.018
ATOM   2507  HB2 TYR A 153      -1.923  13.026   1.238
ATOM   2508  HB3 TYR A 153      -2.305  11.463   1.960
ATOM   2509  CG  TYR A 153      -0.839  11.413   0.393
ATOM   2510  CD1 TYR A 153      -0.219  12.108  -0.663
ATOM   2511  HD1 TYR A 153      -0.611  13.068  -0.975
ATOM   2512  CE1 TYR A 153       0.891  11.555  -1.322
ATOM   2513  HE1 TYR A 153       1.336  12.099  -2.149
ATOM   2514  CZ  TYR A 153       1.379  10.298  -0.914
ATOM   2515  OH  TYR A 153       2.429   9.714  -1.543
ATOM   2516  HH  TYR A 153       2.743  10.266  -2.287
ATOM   2517  CE2 TYR A 153       0.770   9.611   0.146
ATOM   2518  HE2 TYR A 153       1.152   8.648   0.446
ATOM   2519  CD2 TYR A 153      -0.334  10.167   0.809
ATOM   2520  HD2 TYR A 153      -0.797   9.630   1.626
ATOM   2521  C   TYR A 153      -3.679  10.377  -0.131
ATOM   2522  O   TYR A 153      -3.121   9.737  -1.035
ATOM   2523  N   NME A 154      -4.618   9.849   0.667
ATOM   2524  H   NME A 154      -5.005  10.448   1.392
ATOM   2525  CH3 NME A 154      -5.095   8.472   0.585
ATOM   2526  HH31NME A 154      -5.702   8.347  -0.314
ATOM   2527  HH32NME A 154      -5.692   8.234   1.466
ATOM   2528  HH33NME A 154      -4.249   7.785   0.542
ATOM   2529  O   HOH A 155      26.725  33.554  16.219
ATOM   2530  H1  HOH A 155      27.303  34.317  16.356
ATOM   2531  H2  HOH A 155      25.864  33.941  16.571
ATOM   2532  O   HOH A 156      27.735  30.676  20.674
ATOM   2533  H1  HOH A 156      27.718  31.639  20.724
ATOM   2534  H2  HOH A 156      26.804  30.474  21.003
ATOM   2535  O   HOH A 157      28.487  27.269  21.852
ATOM   2536  H1  HOH A 157      28.928  27.136  22.742
ATOM   2537  H2  HOH A 157      27.579  27.541  22.221
ATOM   2538  O   HOH A 158      31.257  30.374  15.189
ATOM   2539  H1  HOH A 158      30.359  30.197  15.603
ATOM   2540  H2  HOH A 158      31.813  30.283  15.978
ATOM   2541  O   HOH A 159      31.388  24.582  22.331
ATOM   2542  H1  HOH A 159      31.676  24.969  23.213
ATOM   2543  H2  HOH A 159      30.406  24.494  22.578
ATOM   2544  O   HOH A 160      34.234  23.716  17.391
ATOM   2545  H1  HOH A 160      34.610  24.500  16.873
ATOM   2546  H2  HOH A 160      34.745  23.011  16.874
ATOM   2547  O   HOH A 161      32.463  23.496  19.092
ATOM   2548  H1  HOH A 161      31.893  22.968  18.440
ATOM   2549  H2  HOH A 161      33.241  23.615  18.421
ATOM   2550  O   HOH A 162      33.447  27.256  15.822
ATOM   2551  H1  HOH A 162      32.840  26.993  16.568
ATOM   2552  H2  HOH A 162      34.151  26.560  15.958
ATOM   2553  O   HOH A 163      27.798  26.778  18.205
ATOM   2554  H1  HOH A 163      28.136  27.593  18.707
ATOM   2555  H2  HOH A 163      28.087  26.114  18.914
ATOM   2556  O   HOH A 164      26.354  29.907   9.284
ATOM   2557  H1  HOH A 164      26.403  29.043   9.810
ATOM   2558  H2  HOH A 164      25.370  29.839   9.054
ATOM   2559  O   HOH A 165      30.522  28.757  17.994
ATOM   2560  H1  HOH A 165      29.839  28.758  18.747
ATOM   2561  H2  HOH A 165      29.910  29.185  17.310
ATOM   2562  O   HOH A 166      29.026  29.722  16.207
ATOM   2563  H1  HOH A 166      28.717  28.962  15.608
ATOM   2564  H2  HOH A 166      28.196  30.292  16.067
ATOM   2565  O   HOH A 167      26.765  31.718  11.024
ATOM   2566  H1  HOH A 167      26.579  31.031  10.309
ATOM   2567  H2  HOH A 167      26.676  32.527  10.432
ATOM   2568  O   HOH A 168      28.676  25.798  16.040
ATOM   2569  H1  HOH A 168      28.518  26.646  15.500
ATOM   2570  H2  HOH A 168      28.299  26.171  16.904
ATOM   2571  O   HOH A 169      31.690  25.402  24.777
ATOM   2572  H1  HOH A 169      31.437  24.475  25.121
ATOM   2573  H2  HOH A 169      32.372  25.611  25.437
ATOM   2574  O   HOH A 170      31.470  29.481  12.892
ATOM   2575  H1  HOH A 170      32.347  29.018  13.120
ATOM   2576  H2  HOH A 170      31.380  29.928  13.813
ATOM   2577  O   HOH A 171      31.078  29.906  10.485
ATOM   2578  H1  HOH A 171      30.411  30.680  10.605
ATOM   2579  H2  HOH A 171      31.233  29.796  11.493
ATOM   2580  O   HOH A 172      33.426  28.012  13.436
ATOM   2581  H1  HOH A 172      32.891  27.163  13.228
ATOM   2582  H2  HOH A 172      33.503  27.799  14.434
ATOM   2583  O   HOH A 173      26.086  30.968  13.352
ATOM   2584  H1  HOH A 173      25.278  31.574  13.449
ATOM   2585  H2  HOH A 173      26.364  31.315  12.441
ATOM   2586  O   HOH A 174      24.509  34.461  17.079
ATOM   2587  H1  HOH A 174      23.831  35.038  16.609
ATOM   2588  H2  HOH A 174      24.210  34.707  18.023
ATOM   2589  O   HOH A 175      28.821  26.647  10.734
ATOM   2590  H1  HOH A 175      29.271  26.960  11.595
ATOM   2591  H2  HOH A 175      29.452  27.159  10.117
ATOM   2592  O   HOH A 176      28.746  25.365  20.128
ATOM   2593  H1  HOH A 176      29.748  25.468  20.034
ATOM   2594  H2  HOH A 176      28.636  26.043  20.865
ATOM   2595  O   HOH A 177      29.518  26.598  24.127
ATOM   2596  H1  HOH A 177      30.425  26.283  24.439
ATOM   2597  H2  HOH A 177      29.229  25.680  23.775
ATOM   2598  O   HOH A 178      31.026  23.100  25.456
ATOM   2599  H1  HOH A 178      30.266  22.694  24.926
ATOM   2600  H2  HOH A 178      31.679  22.346  25.295
ATOM   2601  O   HOH A 179      28.346  27.862  14.648
ATOM   2602  H1  HOH A 179      29.000  27.679  13.892
ATOM   2603  H2  HOH A 179      27.560  28.067  14.036
ATOM   2604  O   HOH A 180      29.999  27.438  12.782
ATOM   2605  H1  HOH A 180      30.810  26.822  12.860
ATOM   2606  H2  HOH A 180      30.542  28.297  12.789
ATOM   2607  O   HOH A 181      31.742  26.621  17.688
ATOM   2608  H1  HOH A 181      31.597  26.321  18.637
ATOM   2609  H2  HOH A 181      31.266  27.524  17.804
ATOM   2610  O   HOH A 182      28.434  33.090   6.005
ATOM   2611  H1  HOH A 182      28.738  33.866   5.501
ATOM   2612  H2  HOH A 182      27.469  33.082   5.677
ATOM   2613  O   HOH A 183      29.317  30.749   5.531
ATOM   2614  H1  HOH A 183      29.048  31.714   5.681
ATOM   2615  H2  HOH A 183      28.851  30.405   6.374
ATOM   2616  O   HOH A 184      28.796  30.154   3.196
ATOM   2617  H1  HOH A 184      28.976  30.421   4.172
ATOM   2618  H2  HOH A 184      27.926  29.666   3.411
ATOM   2619  O   HOH A 185      32.229  28.130   7.572
ATOM   2620  H1  HOH A 185      31.944  28.593   6.707
ATOM   2621  H2  HOH A 185      32.386  27.228   7.153
ATOM   2622  O   HOH A 186      31.402  29.222   5.474
ATOM   2623  H1  HOH A 186      31.497  29.262   4.486
ATOM   2624  H2  HOH A 186      30.623  29.851   5.553
ATOM   2625  O   HOH A 187      32.062  25.041  -0.913
ATOM   2626  H1  HOH A 187      31.116  25.113  -1.287
ATOM   2627  H2  HOH A 187      32.140  26.018  -0.684
ATOM   2628  O   HOH A 188      29.386  31.689  10.744
ATOM   2629  H1  HOH A 188      29.214  32.063   9.822
ATOM   2630  H2  HOH A 188      28.444  31.707  11.060
ATOM   2631  O   HOH A 189      27.480  27.939   1.479
ATOM   2632  H1  HOH A 189      27.114  28.373   2.342
ATOM   2633  H2  HOH A 189      28.172  27.382   1.982
ATOM   2634  O   HOH A 190      31.215  29.581   2.852
ATOM   2635  H1  HOH A 190      31.516  30.421   2.469
ATOM   2636  H2  HOH A 190      30.225  29.797   2.921
ATOM   2637  O   HOH A 191      28.003  29.447  -0.470
ATOM   2638  H1  HOH A 191      27.774  28.801   0.283
ATOM   2639  H2  HOH A 191      28.719  28.854  -0.877
ATOM   2640  O   HOH A 192      29.692  27.888  -1.515
ATOM   2641  H1  HOH A 192      29.612  26.876  -1.532
ATOM   2642  H2  HOH A 192      29.466  28.011  -2.501
ATOM   2643  O   HOH A 193      28.589  27.646   7.393
ATOM   2644  H1  HOH A 193      28.439  28.657   7.424
ATOM   2645  H2  HOH A 193      29.296  27.657   8.127
ATOM   2646  O   HOH A 194      26.733  33.716   9.431
ATOM   2647  H1  HOH A 194      26.499  34.587   9.796
ATOM   2648  H2  HOH A 194      26.098  33.736   8.623
ATOM   2649  O   HOH A 195      30.326  27.912   9.189
ATOM   2650  H1  HOH A 195      31.128  27.960   8.560
ATOM   2651  H2  HOH A 195      30.589  28.754   9.708
ATOM   2652  O   HOH A 196      33.360  29.073   9.676
ATOM   2653  H1  HOH A 196      32.517  29.527   9.971
ATOM   2654  H2  HOH A 196      33.018  28.738   8.795
ATOM   2655  O   HOH A 197      28.700  32.491   8.453
ATOM   2656  H1  HOH A 197      28.642  32.826   7.502
ATOM   2657  H2  HOH A 197      27.939  33.057   8.810
ATOM   2658  O   HOH A 198      29.042  26.551   2.871
ATOM   2659  H1  HOH A 198      30.005  26.735   2.651
ATOM   2660  H2  HOH A 198      29.138  26.508   3.866
ATOM   2661  O   HOH A 199      28.927  26.147   5.425
ATOM   2662  H1  HOH A 199      28.838  26.796   6.205
ATOM   2663  H2  HOH A 199      28.029  25.707   5.565
ATOM   2664  O   HOH A 200      32.401  25.700   6.706
ATOM   2665  H1  HOH A 200      31.663  25.234   6.222
ATOM   2666  H2  HOH A 200      32.276  25.224   7.595
ATOM   2667  O   HOH A 201      28.974  27.947  -3.915
ATOM   2668  H1  HOH A 201      28.785  26.941  -3.922
ATOM   2669  H2  HOH A 201      29.194  27.999  -4.899
ATOM   2670  O   HOH A 202      34.781  27.759  11.255
ATOM   2671  H1  HOH A 202      34.244  28.335  10.613
ATOM   2672  H2  HOH A 202      34.285  28.012  12.085
ATOM   2673  O   HOH A 203      31.633  14.033  28.276
ATOM   2674  H1  HOH A 203      32.261  13.461  28.824
ATOM   2675  H2  HOH A 203      32.354  14.567  27.811
ATOM   2676  O   HOH A 204      30.235  12.144  32.065
ATOM   2677  H1  HOH A 204      30.194  11.798  31.120
ATOM   2678  H2  HOH A 204      31.017  12.761  31.933
ATOM   2679  O   HOH A 205      29.764  19.314  27.805
ATOM   2680  H1  HOH A 205      29.169  20.100  27.552
ATOM   2681  H2  HOH A 205      29.778  19.559  28.808
ATOM   2682  O   HOH A 206      29.861  15.252  29.565
ATOM   2683  H1  HOH A 206      29.735  15.922  28.801
ATOM   2684  H2  HOH A 206      30.552  14.697  29.054
ATOM   2685  O   HOH A 207      27.672  11.901  34.982
ATOM   2686  H1  HOH A 207      28.554  11.399  34.854
ATOM   2687  H2  HOH A 207      27.812  12.511  34.189
ATOM   2688  O   HOH A 208      26.512  11.137  26.713
ATOM   2689  H1  HOH A 208      27.050  11.961  26.458
ATOM   2690  H2  HOH A 208      26.186  11.524  27.602
ATOM   2691  O   HOH A 209      33.437  15.400  27.118
ATOM   2692  H1  HOH A 209      33.988  14.812  26.483
ATOM   2693  H2  HOH A 209      34.185  15.771  27.622
ATOM   2694  O   HOH A 210      31.496   8.497  31.505
ATOM   2695  H1  HOH A 210      31.502   7.486  31.380
ATOM   2696  H2  HOH A 210      31.054   8.487  32.406
ATOM   2697  O   HOH A 211      27.844  13.227  26.303
ATOM   2698  H1  HOH A 211      28.696  12.916  26.778
ATOM   2699  H2  HOH A 211      28.331  13.688  25.545
ATOM   2700  O   HOH A 212      28.143   7.210  33.968
ATOM   2701  H1  HOH A 212      27.730   6.826  34.800
ATOM   2702  H2  HOH A 212      27.397   7.843  33.745
ATOM   2703  O   HOH A 213      28.421  27.869  26.003
ATOM   2704  H1  HOH A 213      28.854  27.399  25.222
ATOM   2705  H2  HOH A 213      27.646  28.249  25.521
ATOM   2706  O   HOH A 214      29.673  16.820  27.629
ATOM   2707  H1  HOH A 214      29.718  17.832  27.734
ATOM   2708  H2  HOH A 214      30.450  16.756  26.983
ATOM   2709  O   HOH A 215      31.507   6.021  31.147
ATOM   2710  H1  HOH A 215      32.054   5.706  30.362
ATOM   2711  H2  HOH A 215      30.901   5.235  31.192
ATOM   2712  O   HOH A 216      31.602  16.750  26.008
ATOM   2713  H1  HOH A 216      32.373  16.245  26.431
ATOM   2714  H2  HOH A 216      31.565  16.177  25.170
ATOM   2715  O   HOH A 217      29.949  12.393  27.328
ATOM   2716  H1  HOH A 217      30.664  13.054  27.577
ATOM   2717  H2  HOH A 217      30.413  12.002  26.524
ATOM   2718  O   HOH A 218      29.675  19.886  30.208
ATOM   2719  H1  HOH A 218      29.930  19.328  30.991
ATOM   2720  H2  HOH A 218      28.922  20.385  30.601
ATOM   2721  O   HOH A 219      34.603  12.332  27.644
ATOM   2722  H1  HOH A 219      34.707  12.960  26.876
ATOM   2723  H2  HOH A 219      34.653  11.479  27.105
ATOM   2724  O   HOH A 220      30.850  11.212  25.253
ATOM   2725  H1  HOH A 220      30.438  11.253  24.328
ATOM   2726  H2  HOH A 220      31.694  10.731  24.959
ATOM   2727  O   HOH A 221      30.262   3.653  25.944
ATOM   2728  H1  HOH A 221      30.914   4.389  25.700
ATOM   2729  H2  HOH A 221      30.364   3.739  26.937
ATOM   2730  O   HOH A 222      31.140  19.215  25.719
ATOM   2731  H1  HOH A 222      31.391  18.237  25.825
ATOM   2732  H2  HOH A 222      30.615  19.272  26.589
ATOM   2733  O   HOH A 223      30.237  18.225  32.123
ATOM   2734  H1  HOH A 223      30.772  18.433  32.910
ATOM   2735  H2  HOH A 223      30.616  17.280  31.962
ATOM   2736  O   HOH A 224      25.625  13.940  30.521
ATOM   2737  H1  HOH A 224      26.510  14.409  30.691
ATOM   2738  H2  HOH A 224      25.201  14.663  29.991
ATOM   2739  O   HOH A 225      33.149  12.545  29.651
ATOM   2740  H1  HOH A 225      33.835  12.430  28.900
ATOM   2741  H2  HOH A 225      32.911  11.565  29.709
ATOM   2742  O   HOH A 226      30.551   9.197  26.875
ATOM   2743  H1  HOH A 226      30.529   9.964  26.242
ATOM   2744  H2  HOH A 226      29.580   9.179  27.110
ATOM   2745  O   HOH A 227      30.385   8.383  33.800
ATOM   2746  H1  HOH A 227      29.494   7.904  33.851
ATOM   2747  H2  HOH A 227      30.873   7.852  34.450
ATOM   2748  O   HOH A 228      32.223  10.153  29.815
ATOM   2749  H1  HOH A 228      31.973   9.461  30.538
ATOM   2750  H2  HOH A 228      31.285  10.545  29.770
ATOM   2751  O   HOH A 229      37.586  16.866  14.801
ATOM   2752  H1  HOH A 229      38.366  17.478  14.947
ATOM   2753  H2  HOH A 229      37.997  16.043  15.220
ATOM   2754  O   HOH A 230      40.583  13.160  19.034
ATOM   2755  H1  HOH A 230      40.307  14.047  18.591
ATOM   2756  H2  HOH A 230      41.488  13.418  19.277
ATOM   2757  O   HOH A 231      33.346  16.785  17.883
ATOM   2758  H1  HOH A 231      32.381  16.659  18.084
ATOM   2759  H2  HOH A 231      33.708  16.010  18.407
ATOM   2760  O   HOH A 232      31.051  22.260  17.367
ATOM   2761  H1  HOH A 232      30.195  21.820  17.072
ATOM   2762  H2  HOH A 232      30.875  23.158  16.939
ATOM   2763  O   HOH A 233      28.486  13.431  12.574
ATOM   2764  H1  HOH A 233      27.519  13.512  12.305
ATOM   2765  H2  HOH A 233      28.850  13.246  11.661
ATOM   2766  O   HOH A 234      26.873  15.270  17.400
ATOM   2767  H1  HOH A 234      26.554  14.458  16.905
ATOM   2768  H2  HOH A 234      26.647  15.948  16.700
ATOM   2769  O   HOH A 235      39.846  15.250  17.941
ATOM   2770  H1  HOH A 235      39.235  15.939  18.325
ATOM   2771  H2  HOH A 235      39.439  15.181  17.038
ATOM   2772  O   HOH A 236      30.971  10.438  18.906
ATOM   2773  H1  HOH A 236      30.112   9.947  19.158
ATOM   2774  H2  HOH A 236      30.554  10.957  18.143
ATOM   2775  O   HOH A 237      41.639   8.253   6.067
ATOM   2776  H1  HOH A 237      41.444   7.680   6.886
ATOM   2777  H2  HOH A 237      41.353   7.565   5.395
ATOM   2778  O   HOH A 238      33.646  11.914  11.913
ATOM   2779  H1  HOH A 238      33.036  11.687  12.691
ATOM   2780  H2  HOH A 238      34.025  12.751  12.332
ATOM   2781  O   HOH A 239      38.451  13.491  13.441
ATOM   2782  H1  HOH A 239      37.789  13.792  12.750
ATOM   2783  H2  HOH A 239      39.074  13.025  12.767
ATOM   2784  O   HOH A 240      30.759  16.964  18.054
ATOM   2785  H1  HOH A 240      30.469  17.057  17.089
ATOM   2786  H2  HOH A 240      30.039  16.288  18.303
ATOM   2787  O   HOH A 241      34.514  14.814  19.033
ATOM   2788  H1  HOH A 241      34.445  14.096  18.311
ATOM   2789  H2  HOH A 241      35.536  14.781  19.077
ATOM   2790  O   HOH A 242      33.698  10.081  22.128
ATOM   2791  H1  HOH A 242      32.908  10.563  21.698
ATOM   2792  H2  HOH A 242      33.470   9.171  21.755
ATOM   2793  O   HOH A 243      39.404  18.694  14.970
ATOM   2794  H1  HOH A 243      40.371  18.806  14.975
ATOM   2795  H2  HOH A 243      39.209  19.131  14.080
ATOM   2796  O   HOH A 244      34.444  18.959  18.493
ATOM   2797  H1  HOH A 244      33.645  19.520  18.209
ATOM   2798  H2  HOH A 244      34.011  18.067  18.251
ATOM   2799  O   HOH A 245      31.734  11.245  21.141
ATOM   2800  H1  HOH A 245      31.736  12.239  20.910
ATOM   2801  H2  HOH A 245      31.447  10.943  20.211
ATOM   2802  O   HOH A 246      30.976  19.110  19.328
ATOM   2803  H1  HOH A 246      31.564  19.567  18.635
ATOM   2804  H2  HOH A 246      30.928  18.222  18.819
ATOM   2805  O   HOH A 247      28.458  19.659  12.820
ATOM   2806  H1  HOH A 247      28.120  20.185  12.014
ATOM   2807  H2  HOH A 247      28.262  20.411  13.486
ATOM   2808  O   HOH A 248      36.015  11.298  18.264
ATOM   2809  H1  HOH A 248      35.443  10.498  18.031
ATOM   2810  H2  HOH A 248      36.675  10.789  18.842
ATOM   2811  O   HOH A 249      38.805  19.794  12.746
ATOM   2812  H1  HOH A 249      37.803  19.828  12.879
ATOM   2813  H2  HOH A 249      38.948  20.802  12.845
ATOM   2814  O   HOH A 250      36.786  12.474   9.960
ATOM   2815  H1  HOH A 250      36.773  13.190  10.688
ATOM   2816  H2  HOH A 250      37.753  12.632   9.700
ATOM   2817  O   HOH A 251      33.604  17.232  15.387
ATOM   2818  H1  HOH A 251      33.241  16.388  14.974
ATOM   2819  H2  HOH A 251      33.483  16.959  16.348
ATOM   2820  O   HOH A 252      36.247  20.024  17.084
ATOM   2821  H1  HOH A 252      35.551  19.632  17.711
ATOM   2822  H2  HOH A 252      36.017  19.393  16.306
ATOM   2823  O   HOH A 253      31.795  13.663  20.553
ATOM   2824  H1  HOH A 253      31.459  13.799  19.617
ATOM   2825  H2  HOH A 253      31.599  14.594  20.893
ATOM   2826  O   HOH A 254      32.518  18.231  21.226
ATOM   2827  H1  HOH A 254      32.392  19.035  21.844
ATOM   2828  H2  HOH A 254      31.933  18.591  20.490
ATOM   2829  O   HOH A 255      39.040  19.313  10.234
ATOM   2830  H1  HOH A 255      39.117  18.317  10.422
ATOM   2831  H2  HOH A 255      39.048  19.583  11.210
ATOM   2832  O   HOH A 256      29.253  16.964  21.232
ATOM   2833  H1  HOH A 256      28.793  17.556  20.590
ATOM   2834  H2  HOH A 256      28.691  16.141  21.100
ATOM   2835  O   HOH A 257      37.147  16.555  12.336
ATOM   2836  H1  HOH A 257      36.370  17.177  12.206
ATOM   2837  H2  HOH A 257      37.263  16.706  13.328
ATOM   2838  O   HOH A 258      32.570  21.129  25.042
ATOM   2839  H1  HOH A 258      32.015  20.334  25.366
ATOM   2840  H2  HOH A 258      33.365  20.964  25.577
ATOM   2841  O   HOH A 259      30.058  15.030  14.293
ATOM   2842  H1  HOH A 259      29.485  14.863  13.500
ATOM   2843  H2  HOH A 259      29.936  14.133  14.721
ATOM   2844  O   HOH A 260      28.384  18.714  19.398
ATOM   2845  H1  HOH A 260      28.221  18.640  18.406
ATOM   2846  H2  HOH A 260      29.352  18.947  19.348
ATOM   2847  O   HOH A 261      28.934  21.001  16.599
ATOM   2848  H1  HOH A 261      28.544  21.108  15.662
ATOM   2849  H2  HOH A 261      28.620  20.050  16.722
ATOM   2850  O   HOH A 262      31.858  23.899  14.218
ATOM   2851  H1  HOH A 262      32.489  23.153  14.423
ATOM   2852  H2  HOH A 262      31.565  24.099  15.155
ATOM   2853  O   HOH A 263      26.619  19.756  20.842
ATOM   2854  H1  HOH A 263      27.344  19.355  20.248
ATOM   2855  H2  HOH A 263      26.961  19.352  21.700
ATOM   2856  O   HOH A 264      32.305  13.396  16.088
ATOM   2857  H1  HOH A 264      31.738  13.576  16.911
ATOM   2858  H2  HOH A 264      33.155  13.200  16.611
ATOM   2859  O   HOH A 265      38.030  10.557  24.271
ATOM   2860  H1  HOH A 265      38.133  10.759  23.285
ATOM   2861  H2  HOH A 265      38.960  10.362  24.476
ATOM   2862  O   HOH A 266      33.859   7.733  11.241
ATOM   2863  H1  HOH A 266      33.968   7.880  12.245
ATOM   2864  H2  HOH A 266      33.467   6.797  11.332
ATOM   2865  O   HOH A 267      34.468  13.005  17.309
ATOM   2866  H1  HOH A 267      34.897  12.813  16.402
ATOM   2867  H2  HOH A 267      35.035  12.316  17.804
ATOM   2868  O   HOH A 268      32.676  15.096  14.359
ATOM   2869  H1  HOH A 268      32.536  14.383  15.093
ATOM   2870  H2  HOH A 268      31.694  15.197  14.165
ATOM   2871  O   HOH A 269      34.671  13.869  13.225
ATOM   2872  H1  HOH A 269      34.924  13.333  14.042
ATOM   2873  H2  HOH A 269      33.939  14.406  13.651
ATOM   2874  O   HOH A 270      34.070  14.907  23.349
ATOM   2875  H1  HOH A 270      34.163  14.301  22.540
ATOM   2876  H2  HOH A 270      34.346  15.754  22.841
ATOM   2877  O   HOH A 271      37.639  11.362  14.433
ATOM   2878  H1  HOH A 271      38.567  11.067  14.701
ATOM   2879  H2  HOH A 271      37.945  12.258  14.046
ATOM   2880  O   HOH A 272      29.901  11.167  22.896
ATOM   2881  H1  HOH A 272      30.651  11.187  22.216
ATOM   2882  H2  HOH A 272      29.489  10.299  22.562
ATOM   2883  O   HOH A 273      34.501  10.183  26.311
ATOM   2884  H1  HOH A 273      33.916   9.633  26.947
ATOM   2885  H2  HOH A 273      33.832  10.120  25.538
ATOM   2886  O   HOH A 274      29.834   8.292  15.462
ATOM   2887  H1  HOH A 274      28.804   8.198  15.431
ATOM   2888  H2  HOH A 274      29.894   8.101  16.454
ATOM   2889  O   HOH A 275      26.709  12.496   9.676
ATOM   2890  H1  HOH A 275      26.358  12.892  10.537
ATOM   2891  H2  HOH A 275      25.999  12.865   9.072
ATOM   2892  O   HOH A 276      38.077  16.873  18.941
ATOM   2893  H1  HOH A 276      37.368  17.365  19.476
ATOM   2894  H2  HOH A 276      38.280  17.671  18.328
ATOM   2895  O   HOH A 277      38.580  14.721  15.692
ATOM   2896  H1  HOH A 277      38.592  14.213  14.823
ATOM   2897  H2  HOH A 277      38.167  13.989  16.248
ATOM   2898  O   HOH A 278      30.906  13.730  18.162
ATOM   2899  H1  HOH A 278      30.097  14.340  18.298
ATOM   2900  H2  HOH A 278      30.368  12.942  17.815
ATOM   2901  O   HOH A 279      36.640  14.219  11.718
ATOM   2902  H1  HOH A 279      35.822  14.134  12.325
ATOM   2903  H2  HOH A 279      36.830  15.193  11.970
ATOM   2904  O   HOH A 280      40.192   8.604  13.938
ATOM   2905  H1  HOH A 280      40.528   8.152  14.782
ATOM   2906  H2  HOH A 280      40.177   9.541  14.350
ATOM   2907  O   HOH A 281      33.365  16.660  10.519
ATOM   2908  H1  HOH A 281      33.106  16.882   9.553
ATOM   2909  H2  HOH A 281      34.107  16.006  10.229
ATOM   2910  O   HOH A 282      27.444  18.830  23.113
ATOM   2911  H1  HOH A 282      27.589  17.948  23.587
ATOM   2912  H2  HOH A 282      28.384  19.181  23.283
ATOM   2913  O   HOH A 283      36.997  14.593  19.151
ATOM   2914  H1  HOH A 283      37.612  14.187  19.861
ATOM   2915  H2  HOH A 283      37.455  15.495  19.135
ATOM   2916  O   HOH A 284      29.425  12.483  14.697
ATOM   2917  H1  HOH A 284      29.605  11.559  14.306
ATOM   2918  H2  HOH A 284      28.957  12.830  13.855
ATOM   2919  O   HOH A 285      31.455  15.958  21.574
ATOM   2920  H1  HOH A 285      30.522  16.388  21.439
ATOM   2921  H2  HOH A 285      31.950  16.833  21.441
ATOM   2922  O   HOH A 286      32.599  19.589  15.133
ATOM   2923  H1  HOH A 286      31.817  19.324  14.545
ATOM   2924  H2  HOH A 286      33.018  18.670  15.158
ATOM   2925  O   HOH A 287      37.360   9.587  12.657
ATOM   2926  H1  HOH A 287      37.336  10.284  13.384
ATOM   2927  H2  HOH A 287      36.621   9.986  12.093
ATOM   2928  O   HOH A 288      39.197  12.984   9.372
ATOM   2929  H1  HOH A 288      39.287  13.947   9.098
ATOM   2930  H2  HOH A 288      39.501  12.582   8.499
ATOM   2931  O   HOH A 289      32.436  20.191  17.589
ATOM   2932  H1  HOH A 289      32.485  19.989  16.596
ATOM   2933  H2  HOH A 289      31.927  21.067  17.478
ATOM   2934  O   HOH A 290      38.965  22.260  12.973
ATOM   2935  H1  HOH A 290      37.976  22.436  12.926
ATOM   2936  H2  HOH A 290      39.287  23.162  13.096
ATOM   2937  O   HOH A 291      28.006  14.823  20.831
ATOM   2938  H1  HOH A 291      27.000  14.966  20.891
ATOM   2939  H2  HOH A 291      28.047  14.057  21.480
ATOM   2940  O   HOH A 292      31.565  15.258  23.962
ATOM   2941  H1  HOH A 292      31.450  15.544  22.983
ATOM   2942  H2  HOH A 292      32.541  15.012  23.847
ATOM   2943  O   HOH A 293      38.470  18.799  17.410
ATOM   2944  H1  HOH A 293      37.683  19.403  17.294
ATOM   2945  H2  HOH A 293      38.835  18.858  16.488
ATOM   2946  O   HOH A 294      35.741  18.515  15.205
ATOM   2947  H1  HOH A 294      36.396  17.751  15.094
ATOM   2948  H2  HOH A 294      34.907  17.938  15.238
ATOM   2949  O   HOH A 295      27.407  16.724  11.035
ATOM   2950  H1  HOH A 295      27.619  17.529  10.446
ATOM   2951  H2  HOH A 295      28.322  16.294  10.923
ATOM   2952  O   HOH A 296      36.302  19.854  13.164
ATOM   2953  H1  HOH A 296      36.040  19.383  14.030
ATOM   2954  H2  HOH A 296      35.781  19.206  12.568
ATOM   2955  O   HOH A 297      32.265  11.432  14.005
ATOM   2956  H1  HOH A 297      32.000  12.100  14.682
ATOM   2957  H2  HOH A 297      31.371  10.967  13.913
ATOM   2958  O   HOH A 298      29.792  24.374  10.081
ATOM   2959  H1  HOH A 298      29.912  24.069  11.045
ATOM   2960  H2  HOH A 298      29.334  25.244  10.314
ATOM   2961  O   HOH A 299      28.880   9.019  22.082
ATOM   2962  H1  HOH A 299      27.940   8.730  22.327
ATOM   2963  H2  HOH A 299      29.327   8.231  22.564
ATOM   2964  O   HOH A 300      26.807  21.804  25.216
ATOM   2965  H1  HOH A 300      26.196  21.116  24.808
ATOM   2966  H2  HOH A 300      26.204  22.598  25.077
ATOM   2967  O   HOH A 301      33.254  22.200  11.905
ATOM   2968  H1  HOH A 301      34.137  21.953  11.524
ATOM   2969  H2  HOH A 301      33.462  22.041  12.874
ATOM   2970  O   HOH A 302      30.649  18.676  13.738
ATOM   2971  H1  HOH A 302      29.834  19.108  13.322
ATOM   2972  H2  HOH A 302      30.920  18.161  12.900
ATOM   2973  O   HOH A 303      37.660  12.985  17.322
ATOM   2974  H1  HOH A 303      36.998  12.280  17.631
ATOM   2975  H2  HOH A 303      37.397  13.661  18.041
ATOM   2976  O   HOH A 304      39.197  16.880  10.921
ATOM   2977  H1  HOH A 304      39.847  16.674  11.618
ATOM   2978  H2  HOH A 304      38.352  16.743  11.472
ATOM   2979  O   HOH A 305      36.446  22.340  12.874
ATOM   2980  H1  HOH A 305      36.076  22.270  11.915
ATOM   2981  H2  HOH A 305      36.326  21.340  13.057
ATOM   2982  O   HOH A 306      35.391  12.298  15.094
ATOM   2983  H1  HOH A 306      34.917  11.395  15.078
ATOM   2984  H2  HOH A 306      36.312  11.910  14.904
ATOM   2985  O   HOH A 307      39.739  11.542  17.291
ATOM   2986  H1  HOH A 307      38.888  12.106  17.272
ATOM   2987  H2  HOH A 307      40.172  12.095  18.032
ATOM   2988  O   HOH A 308      39.741  12.229  11.746
ATOM   2989  H1  HOH A 308      39.624  12.493  10.783
ATOM   2990  H2  HOH A 308      39.849  11.249  11.604
ATOM   2991  O   HOH A 309      35.327  25.505  15.968
ATOM   2992  H1  HOH A 309      35.555  25.156  15.026
ATOM   2993  H2  HOH A 309      36.226  25.800  16.204
ATOM   2994  O   HOH A 310      33.059  11.431   9.468
ATOM   2995  H1  HOH A 310      32.683  10.505   9.644
ATOM   2996  H2  HOH A 310      33.184  11.674  10.440
ATOM   2997  O   HOH A 311      31.244  17.415  11.665
ATOM   2998  H1  HOH A 311      32.108  17.069  11.264
ATOM   2999  H2  HOH A 311      30.664  16.656  11.344
ATOM   3000  O   HOH A 312      29.662  15.690  10.658
ATOM   3001  H1  HOH A 312      29.522  14.703  10.509
ATOM   3002  H2  HOH A 312      29.941  15.889   9.695
ATOM   3003  O   HOH A 313      31.274  25.526  19.976
ATOM   3004  H1  HOH A 313      31.414  25.273  20.947
ATOM   3005  H2  HOH A 313      31.784  24.723  19.605
ATOM   3006  O   HOH A 314      27.839  21.466  14.414
ATOM   3007  H1  HOH A 314      26.834  21.581  14.416
ATOM   3008  H2  HOH A 314      28.060  22.447  14.329
ATOM   3009  O   HOH A 315      32.097  20.251  22.640
ATOM   3010  H1  HOH A 315      32.201  21.109  22.101
ATOM   3011  H2  HOH A 315      32.406  20.640  23.511
ATOM   3012  O   HOH A 316      33.129  24.625  11.151
ATOM   3013  H1  HOH A 316      34.111  24.836  11.211
ATOM   3014  H2  HOH A 316      33.193  23.663  11.445
ATOM   3015  O   HOH A 317      27.620  16.628  24.470
ATOM   3016  H1  HOH A 317      26.769  16.192  24.138
ATOM   3017  H2  HOH A 317      27.374  16.645  25.442
ATOM   3018  O   HOH A 318      35.643  18.705   9.453
ATOM   3019  H1  HOH A 318      35.097  18.809   8.614
ATOM   3020  H2  HOH A 318      36.234  19.507   9.306
ATOM   3021  O   HOH A 319      34.624  16.901  21.906
ATOM   3022  H1  HOH A 319      33.840  17.459  21.626
ATOM   3023  H2  HOH A 319      35.273  17.233  21.234
ATOM   3024  O   HOH A 320      38.491  21.487   7.238
ATOM   3025  H1  HOH A 320      38.000  21.578   6.349
ATOM   3026  H2  HOH A 320      38.960  22.340   7.216
ATOM   3027  O   HOH A 321      29.066  14.451  24.428
ATOM   3028  H1  HOH A 321      30.017  14.732  24.312
ATOM   3029  H2  HOH A 321      28.652  15.362  24.390
ATOM   3030  O   HOH A 322      35.157  18.106  11.764
ATOM   3031  H1  HOH A 322      34.353  17.568  11.483
ATOM   3032  H2  HOH A 322      35.386  18.380  10.782
ATOM   3033  O   HOH A 323      34.186  13.517  21.223
ATOM   3034  H1  HOH A 323      33.188  13.487  20.997
ATOM   3035  H2  HOH A 323      34.424  14.067  20.404
ATOM   3036  O   HOH A 324      35.205  15.201   9.707
ATOM   3037  H1  HOH A 324      35.819  15.166   8.913
ATOM   3038  H2  HOH A 324      35.802  14.792  10.371
ATOM   3039  O   HOH A 325      36.181  12.318  24.485
ATOM   3040  H1  HOH A 325      35.933  12.086  23.533
ATOM   3041  H2  HOH A 325      36.956  11.685  24.549
ATOM   3042  O   HOH A 326      35.638  11.666  22.099
ATOM   3043  H1  HOH A 326      35.068  12.412  21.701
ATOM   3044  H2  HOH A 326      34.888  10.975  22.095
ATOM   3045  O   HOH A 327      36.192  18.132  20.122
ATOM   3046  H1  HOH A 327      36.365  18.957  20.605
ATOM   3047  H2  HOH A 327      35.486  18.477  19.482
ATOM   3048  O   HOH A 328      30.209  13.554   7.696
ATOM   3049  H1  HOH A 328      30.980  12.915   7.477
ATOM   3050  H2  HOH A 328      29.769  13.456   6.786
ATOM   3051  O   HOH A 329      32.187  22.380  21.323
ATOM   3052  H1  HOH A 329      32.443  22.799  20.431
ATOM   3053  H2  HOH A 329      31.957  23.254  21.774
ATOM   3054  O   HOH A 330      38.591  13.446  20.682
ATOM   3055  H1  HOH A 330      39.411  13.225  20.167
ATOM   3056  H2  HOH A 330      38.494  12.591  21.181
ATOM   3057  O   HOH A 331      39.470   8.327   9.398
ATOM   3058  H1  HOH A 331      39.655   8.885  10.220
ATOM   3059  H2  HOH A 331      38.808   7.704   9.849
ATOM   3060  O   HOH A 332      32.079  12.005   7.167
ATOM   3061  H1  HOH A 332      32.260  11.093   6.729
ATOM   3062  H2  HOH A 332      32.426  11.738   8.076
ATOM   3063  O   HOH A 333      32.188   9.085   9.917
ATOM   3064  H1  HOH A 333      31.994   8.405   9.196
ATOM   3065  H2  HOH A 333      32.880   8.530  10.404
ATOM   3066  O   HOH A 334      35.964  24.657  13.732
ATOM   3067  H1  HOH A 334      35.806  25.033  12.808
ATOM   3068  H2  HOH A 334      36.145  23.709  13.422
ATOM   3069  O   HOH A 335      30.339  19.322  10.199
ATOM   3070  H1  HOH A 335      30.563  20.117  10.813
ATOM   3071  H2  HOH A 335      30.771  18.629  10.781
ATOM   3072  O   HOH A 336      27.494  22.995  17.277
ATOM   3073  H1  HOH A 336      28.061  22.208  17.026
ATOM   3074  H2  HOH A 336      27.671  22.947  18.274
ATOM   3075  O   HOH A 337      33.509  21.898  14.425
ATOM   3076  H1  HOH A 337      34.313  21.961  15.028
ATOM   3077  H2  HOH A 337      33.205  20.987  14.716
ATOM   3078  O   HOH A 338      27.989  22.911  19.739
ATOM   3079  H1  HOH A 338      28.802  22.367  20.006
ATOM   3080  H2  HOH A 338      28.365  23.811  19.969
ATOM   3081  O   HOH A 339      29.929  17.201  15.651
ATOM   3082  H1  HOH A 339      29.931  16.345  15.113
ATOM   3083  H2  HOH A 339      30.255  17.791  14.889
ATOM   3084  O   HOH A 340      39.678   9.626  11.605
ATOM   3085  H1  HOH A 340      40.093   9.194  12.409
ATOM   3086  H2  HOH A 340      38.734   9.645  11.969
ATOM   3087  O   HOH A 341      29.010  15.242  18.591
ATOM   3088  H1  HOH A 341      28.578  15.043  19.495
ATOM   3089  H2  HOH A 341      28.103  15.275  18.093
ATOM   3090  O   HOH A 342      28.133  12.955  22.590
ATOM   3091  H1  HOH A 342      28.846  12.237  22.707
ATOM   3092  H2  HOH A 342      28.461  13.527  23.361
ATOM   3093  O   HOH A 343      26.018  13.592  11.829
ATOM   3094  H1  HOH A 343      25.578  13.719  12.754
ATOM   3095  H2  HOH A 343      25.609  14.437  11.438
ATOM   3096  O   HOH A 344      29.182  13.220  10.062
ATOM   3097  H1  HOH A 344      29.591  13.245   9.144
ATOM   3098  H2  HOH A 344      28.288  12.854   9.788
ATOM   3099  O   HOH A 345      28.307   8.987   9.851
ATOM   3100  H1  HOH A 345      29.057   8.965  10.506
ATOM   3101  H2  HOH A 345      28.781   8.595   9.067
ATOM   3102  O   HOH A 346      28.955   9.133  19.586
ATOM   3103  H1  HOH A 346      28.022   9.539  19.577
ATOM   3104  H2  HOH A 346      28.988   9.050  20.607
ATOM   3105  O   HOH A 347      26.664  10.207  19.751
ATOM   3106  H1  HOH A 347      26.411  10.778  20.544
ATOM   3107  H2  HOH A 347      25.974   9.483  19.921
ATOM   3108  O   HOH A 348      29.752  19.720  23.641
ATOM   3109  H1  HOH A 348      30.244  19.446  24.484
ATOM   3110  H2  HOH A 348      30.579  19.833  23.079
ATOM   3111  O   HOH A 349      35.546  22.121  15.941
ATOM   3112  H1  HOH A 349      36.374  22.365  15.493
ATOM   3113  H2  HOH A 349      35.887  21.306  16.445
ATOM   3114  O   HOH A 350      34.727  13.942  25.588
ATOM   3115  H1  HOH A 350      35.387  13.265  25.156
ATOM   3116  H2  HOH A 350      34.474  14.348  24.685
ATOM   3117  O   HOH A 351      29.752   7.034  23.311
ATOM   3118  H1  HOH A 351      29.935   6.143  22.856
ATOM   3119  H2  HOH A 351      28.993   6.728  23.876
ATOM   3120  O   HOH A 352      29.077  22.127  24.146
ATOM   3121  H1  HOH A 352      28.165  21.960  24.550
ATOM   3122  H2  HOH A 352      29.268  21.170  23.898
ATOM   3123  O   HOH A 353      39.250   9.020  17.660
ATOM   3124  H1  HOH A 353      39.962   8.587  17.111
ATOM   3125  H2  HOH A 353      39.507   9.972  17.487
ATOM   3126  O   HOH A 354      29.977  21.472  20.389
ATOM   3127  H1  HOH A 354      30.302  20.595  20.081
ATOM   3128  H2  HOH A 354      30.829  21.817  20.783
ATOM   3129  O   HOH A 355      30.843  24.608  16.456
ATOM   3130  H1  HOH A 355      31.267  25.398  16.938
ATOM   3131  H2  HOH A 355      29.956  25.084  16.290
ATOM   3132  O   HOH A 356      38.060  11.173  21.789
ATOM   3133  H1  HOH A 356      37.056  11.367  21.852
ATOM   3134  H2  HOH A 356      37.997  10.686  20.903
ATOM   3135  O   HOH A 357      28.344  23.978  14.270
ATOM   3136  H1  HOH A 357      28.506  24.639  15.020
ATOM   3137  H2  HOH A 357      27.352  24.204  14.172
ATOM   3138  O   HOH A 358      30.064  10.237  13.786
ATOM   3139  H1  HOH A 358      30.032   9.749  12.905
ATOM   3140  H2  HOH A 358      29.962   9.433  14.378
ATOM   3141  O   HOH A 359      40.115  10.887  14.934
ATOM   3142  H1  HOH A 359      40.045  11.158  15.917
ATOM   3143  H2  HOH A 359      40.798  11.533  14.670
ATOM   3144  O   HOH A 360      37.691   6.982  17.591
ATOM   3145  H1  HOH A 360      38.355   6.442  17.058
ATOM   3146  H2  HOH A 360      38.272   7.804  17.681
ATOM   3147  O   HOH A 361      30.042  23.557  12.468
ATOM   3148  H1  HOH A 361      30.799  23.695  13.133
ATOM   3149  H2  HOH A 361      29.305  23.745  13.150
ATOM   3150  O   HOH A 362      30.253   8.966  11.568
ATOM   3151  H1  HOH A 362      30.523   8.049  11.909
ATOM   3152  H2  HOH A 362      31.024   9.072  10.927
ATOM   3153  O   HOH A 363      34.147  10.130  15.053
ATOM   3154  H1  HOH A 363      33.345  10.558  14.605
ATOM   3155  H2  HOH A 363      34.174   9.311  14.462
ATOM   3156  O   HOH A 364      32.830   9.830  24.487
ATOM   3157  H1  HOH A 364      33.242   9.983  23.572
ATOM   3158  H2  HOH A 364      32.577   8.863  24.312
ATOM   3159  O   HOH A 365      32.049  26.014  12.903
ATOM   3160  H1  HOH A 365      32.458  25.498  12.118
ATOM   3161  H2  HOH A 365      32.005  25.194  13.509
ATOM   3162  O   HOH A 366      30.911  21.317  11.553
ATOM   3163  H1  HOH A 366      30.480  22.160  11.890
ATOM   3164  H2  HOH A 366      31.867  21.642  11.648
ATOM   3165  O   HOH A 367      37.325  16.739   0.254
ATOM   3166  H1  HOH A 367      37.026  15.772   0.299
ATOM   3167  H2  HOH A 367      37.917  16.623  -0.559
ATOM   3168  O   HOH A 368      35.604  18.568   0.217
ATOM   3169  H1  HOH A 368      35.089  18.078   0.949
ATOM   3170  H2  HOH A 368      36.337  17.861   0.155
ATOM   3171  O   HOH A 369      29.321  18.592   2.105
ATOM   3172  H1  HOH A 369      28.657  18.074   2.659
ATOM   3173  H2  HOH A 369      30.046  18.623   2.811
ATOM   3174  O   HOH A 370      30.889  21.998   2.078
ATOM   3175  H1  HOH A 370      30.621  21.633   1.180
ATOM   3176  H2  HOH A 370      31.508  22.723   1.707
ATOM   3177  O   HOH A 371      29.420  14.864  -4.235
ATOM   3178  H1  HOH A 371      28.670  15.142  -3.625
ATOM   3179  H2  HOH A 371      28.950  14.092  -4.672
ATOM   3180  O   HOH A 372      27.117  15.562   1.733
ATOM   3181  H1  HOH A 372      27.908  14.964   2.011
ATOM   3182  H2  HOH A 372      27.193  15.310   0.749
ATOM   3183  O   HOH A 373      34.263  19.555  -1.659
ATOM   3184  H1  HOH A 373      34.769  19.168  -0.866
ATOM   3185  H2  HOH A 373      34.910  19.221  -2.354
ATOM   3186  O   HOH A 374      24.400  15.744  -1.553
ATOM   3187  H1  HOH A 374      24.704  16.713  -1.497
ATOM   3188  H2  HOH A 374      23.503  15.912  -1.087
ATOM   3189  O   HOH A 375      36.667  14.281   0.396
ATOM   3190  H1  HOH A 375      36.608  13.718   1.251
ATOM   3191  H2  HOH A 375      37.495  13.794   0.051
ATOM   3192  O   HOH A 376      31.836  14.378  -3.782
ATOM   3193  H1  HOH A 376      31.650  13.852  -2.924
ATOM   3194  H2  HOH A 376      30.853  14.534  -3.998
ATOM   3195  O   HOH A 377      27.583  11.945   2.385
ATOM   3196  H1  HOH A 377      27.432  11.764   3.368
ATOM   3197  H2  HOH A 377      26.631  12.147   2.147
ATOM   3198  O   HOH A 378      32.769  16.107   0.978
ATOM   3199  H1  HOH A 378      33.442  16.722   1.451
ATOM   3200  H2  HOH A 378      33.465  15.692   0.363
ATOM   3201  O   HOH A 379      34.225   9.722   4.021
ATOM   3202  H1  HOH A 379      34.747  10.108   3.246
ATOM   3203  H2  HOH A 379      33.398   9.492   3.477
ATOM   3204  O   HOH A 380      32.401  20.876   3.772
ATOM   3205  H1  HOH A 380      32.462  21.651   4.426
ATOM   3206  H2  HOH A 380      31.802  21.352   3.108
ATOM   3207  O   HOH A 381      30.895  12.932   3.389
ATOM   3208  H1  HOH A 381      31.662  13.604   3.302
ATOM   3209  H2  HOH A 381      31.289  12.277   2.722
ATOM   3210  O   HOH A 382      32.554  22.747   5.430
ATOM   3211  H1  HOH A 382      33.280  23.435   5.328
ATOM   3212  H2  HOH A 382      31.780  23.407   5.405
ATOM   3213  O   HOH A 383      28.063  19.904  -3.612
ATOM   3214  H1  HOH A 383      29.041  20.131  -3.730
ATOM   3215  H2  HOH A 383      27.771  20.837  -3.339
ATOM   3216  O   HOH A 384      35.080  11.156  -0.291
ATOM   3217  H1  HOH A 384      34.649  10.905  -1.185
ATOM   3218  H2  HOH A 384      36.010  11.268  -0.692
ATOM   3219  O   HOH A 385      37.061  14.904  -2.911
ATOM   3220  H1  HOH A 385      36.215  15.446  -2.834
ATOM   3221  H2  HOH A 385      36.618  14.016  -3.051
ATOM   3222  O   HOH A 386      38.383  17.889  -3.796
ATOM   3223  H1  HOH A 386      38.473  17.396  -4.631
ATOM   3224  H2  HOH A 386      38.930  18.672  -3.974
ATOM   3225  O   HOH A 387      39.815  15.009   2.431
ATOM   3226  H1  HOH A 387      40.023  15.081   1.457
ATOM   3227  H2  HOH A 387      39.318  15.869   2.526
ATOM   3228  O   HOH A 388      30.992  16.558  -0.705
ATOM   3229  H1  HOH A 388      30.499  15.694  -0.501
ATOM   3230  H2  HOH A 388      31.699  16.424   0.022
ATOM   3231  O   HOH A 389      30.086  21.132  -0.229
ATOM   3232  H1  HOH A 389      29.852  20.140  -0.334
ATOM   3233  H2  HOH A 389      30.914  21.059  -0.830
ATOM   3234  O   HOH A 390      32.628  14.672   3.054
ATOM   3235  H1  HOH A 390      32.616  15.198   2.188
ATOM   3236  H2  HOH A 390      32.143  15.381   3.601
ATOM   3237  O   HOH A 391      32.825  21.077   7.312
ATOM   3238  H1  HOH A 391      31.865  20.948   7.581
ATOM   3239  H2  HOH A 391      32.655  21.705   6.542
ATOM   3240  O   HOH A 392      31.034  18.781   3.968
ATOM   3241  H1  HOH A 392      31.644  19.589   3.885
ATOM   3242  H2  HOH A 392      30.521  19.147   4.774
ATOM   3243  O   HOH A 393      34.056  22.764   8.761
ATOM   3244  H1  HOH A 393      33.626  22.061   8.186
ATOM   3245  H2  HOH A 393      33.321  23.433   8.715
ATOM   3246  O   HOH A 394      27.551  15.782  -2.776
ATOM   3247  H1  HOH A 394      27.623  16.730  -2.407
ATOM   3248  H2  HOH A 394      26.957  16.052  -3.566
ATOM   3249  O   HOH A 395      26.379  19.467   4.387
ATOM   3250  H1  HOH A 395      25.527  19.120   4.764
ATOM   3251  H2  HOH A 395      26.767  18.595   4.083
ATOM   3252  O   HOH A 396      28.452  23.228  -1.093
ATOM   3253  H1  HOH A 396      27.969  22.760  -1.845
ATOM   3254  H2  HOH A 396      29.026  22.472  -0.812
ATOM   3255  O   HOH A 397      31.874  27.576  -0.328
ATOM   3256  H1  HOH A 397      32.431  28.266  -0.725
ATOM   3257  H2  HOH A 397      31.002  27.801  -0.799
ATOM   3258  O   HOH A 398      28.048  21.245   5.141
ATOM   3259  H1  HOH A 398      27.379  20.539   4.866
ATOM   3260  H2  HOH A 398      28.762  20.583   5.442
ATOM   3261  O   HOH A 399      31.772  11.412   1.574
ATOM   3262  H1  HOH A 399      30.835  11.121   1.319
ATOM   3263  H2  HOH A 399      32.026  10.538   2.017
ATOM   3264  O   HOH A 400      34.858  13.963   3.904
ATOM   3265  H1  HOH A 400      34.503  13.694   4.815
ATOM   3266  H2  HOH A 400      33.938  14.209   3.527
ATOM   3267  O   HOH A 401      39.340  19.112   7.675
ATOM   3268  H1  HOH A 401      39.141  20.078   7.488
ATOM   3269  H2  HOH A 401      39.363  19.176   8.671
ATOM   3270  O   HOH A 402      36.919  15.110   7.772
ATOM   3271  H1  HOH A 402      37.259  14.365   7.162
ATOM   3272  H2  HOH A 402      37.820  15.291   8.197
ATOM   3273  O   HOH A 403      34.497   8.397  -3.548
ATOM   3274  H1  HOH A 403      35.044   7.900  -2.869
ATOM   3275  H2  HOH A 403      33.596   8.037  -3.272
ATOM   3276  O   HOH A 404      35.608  10.568   2.047
ATOM   3277  H1  HOH A 404      36.065  11.455   2.230
ATOM   3278  H2  HOH A 404      35.331  10.819   1.092
ATOM   3279  O   HOH A 405      29.843  14.382  -0.137
ATOM   3280  H1  HOH A 405      29.635  14.221   0.845
ATOM   3281  H2  HOH A 405      28.852  14.427  -0.406
ATOM   3282  O   HOH A 406      33.471  15.977   6.052
ATOM   3283  H1  HOH A 406      33.644  14.980   6.112
ATOM   3284  H2  HOH A 406      34.448  16.245   6.003
ATOM   3285  O   HOH A 407      38.754  13.076  -0.297
ATOM   3286  H1  HOH A 407      39.219  12.463   0.385
ATOM   3287  H2  HOH A 407      39.433  13.815  -0.234
ATOM   3288  O   HOH A 408      27.473  11.557   4.883
ATOM   3289  H1  HOH A 408      26.633  11.506   5.430
ATOM   3290  H2  HOH A 408      27.876  10.689   5.197
ATOM   3291  O   HOH A 409      35.048  12.292   8.117
ATOM   3292  H1  HOH A 409      34.287  11.971   8.695
ATOM   3293  H2  HOH A 409      35.714  12.414   8.866
ATOM   3294  O   HOH A 410      29.383  10.637   1.251
ATOM   3295  H1  HOH A 410      28.610  11.168   1.657
ATOM   3296  H2  HOH A 410      29.425   9.961   2.010
ATOM   3297  O   HOH A 411      27.681  14.202  -7.652
ATOM   3298  H1  HOH A 411      27.080  15.005  -7.469
ATOM   3299  H2  HOH A 411      28.229  14.688  -8.379
ATOM   3300  O   HOH A 412      38.263  17.063   2.553
ATOM   3301  H1  HOH A 412      37.426  16.683   2.985
ATOM   3302  H2  HOH A 412      37.907  17.012   1.603
ATOM   3303  O   HOH A 413      34.434  14.928  -0.474
ATOM   3304  H1  HOH A 413      33.974  14.043  -0.281
ATOM   3305  H2  HOH A 413      35.347  14.633  -0.121
ATOM   3306  O   HOH A 414      28.990  14.006   2.210
ATOM   3307  H1  HOH A 414      28.425  13.160   2.281
ATOM   3308  H2  HOH A 414      29.771  13.626   2.742
ATOM   3309  O   HOH A 415      35.722  12.693  -3.247
ATOM   3310  H1  HOH A 415      35.103  11.941  -2.978
ATOM   3311  H2  HOH A 415      35.119  13.051  -3.977
ATOM   3312  O   HOH A 416      36.595  12.884   2.467
ATOM   3313  H1  HOH A 416      37.390  13.045   3.069
ATOM   3314  H2  HOH A 416      35.904  13.280   3.099
ATOM   3315  O   HOH A 417      34.073  15.498  -6.520
ATOM   3316  H1  HOH A 417      33.124  15.259  -6.817
ATOM   3317  H2  HOH A 417      34.168  14.726  -5.882
ATOM   3318  O   HOH A 418      40.755   6.378   4.537
ATOM   3319  H1  HOH A 418      40.053   5.983   5.161
ATOM   3320  H2  HOH A 418      41.290   5.577   4.408
ATOM   3321  O   HOH A 419      29.744  19.605   5.921
ATOM   3322  H1  HOH A 419      29.392  18.742   6.331
ATOM   3323  H2  HOH A 419      30.051  20.006   6.808
ATOM   3324  O   HOH A 420      34.491  17.451   2.132
ATOM   3325  H1  HOH A 420      35.149  16.984   2.738
ATOM   3326  H2  HOH A 420      34.467  18.325   2.649
ATOM   3327  O   HOH A 421      24.689  11.599  -5.116
ATOM   3328  H1  HOH A 421      25.662  11.434  -4.876
ATOM   3329  H2  HOH A 421      24.452  12.054  -4.236
ATOM   3330  O   HOH A 422      31.462  16.338   4.517
ATOM   3331  H1  HOH A 422      31.427  17.327   4.335
ATOM   3332  H2  HOH A 422      32.233  16.349   5.161
ATOM   3333  O   HOH A 423      35.934  18.502  -3.289
ATOM   3334  H1  HOH A 423      35.619  17.582  -2.994
ATOM   3335  H2  HOH A 423      36.894  18.249  -3.433
ATOM   3336  O   HOH A 424      40.229  15.171  -0.113
ATOM   3337  H1  HOH A 424      41.121  15.437  -0.388
ATOM   3338  H2  HOH A 424      39.697  15.681  -0.808
ATOM   3339  O   HOH A 425      36.508  24.068   4.555
ATOM   3340  H1  HOH A 425      36.831  24.961   4.356
ATOM   3341  H2  HOH A 425      35.554  24.315   4.815
ATOM   3342  O   HOH A 426      29.604  18.660  -0.395
ATOM   3343  H1  HOH A 426      30.202  17.854  -0.544
ATOM   3344  H2  HOH A 426      29.525  18.537   0.611
ATOM   3345  O   HOH A 427      29.017  15.778   4.906
ATOM   3346  H1  HOH A 427      29.082  14.785   5.082
ATOM   3347  H2  HOH A 427      29.997  15.912   4.688
ATOM   3348  O   HOH A 428      32.775  17.133   8.134
ATOM   3349  H1  HOH A 428      33.312  17.962   7.877
ATOM   3350  H2  HOH A 428      33.049  16.613   7.295
ATOM   3351  O   HOH A 429      37.984  21.188   2.644
ATOM   3352  H1  HOH A 429      38.526  21.663   1.994
ATOM   3353  H2  HOH A 429      37.146  21.072   2.094
ATOM   3354  O   HOH A 430      34.989  16.313  -2.481
ATOM   3355  H1  HOH A 430      34.780  15.773  -1.635
ATOM   3356  H2  HOH A 430      34.003  16.502  -2.679
ATOM   3357  O   HOH A 431      26.149  16.492  -4.690
ATOM   3358  H1  HOH A 431      26.234  16.298  -5.681
ATOM   3359  H2  HOH A 431      26.094  17.498  -4.789
ATOM   3360  O   HOH A 432      32.509  16.607  -2.773
ATOM   3361  H1  HOH A 432      31.898  16.588  -1.973
ATOM   3362  H2  HOH A 432      32.253  15.707  -3.144
ATOM   3363  O   HOH A 433      35.810  20.817   1.357
ATOM   3364  H1  HOH A 433      35.799  19.967   0.799
ATOM   3365  H2  HOH A 433      35.266  20.412   2.122
ATOM   3366  O   HOH A 434      29.635  10.165  -1.201
ATOM   3367  H1  HOH A 434      29.458  10.398  -0.231
ATOM   3368  H2  HOH A 434      28.747  10.519  -1.553
ATOM   3369  O   HOH A 435      35.683  19.886   5.434
ATOM   3370  H1  HOH A 435      36.465  19.269   5.654
ATOM   3371  H2  HOH A 435      36.267  20.713   5.321
ATOM   3372  O   HOH A 436      28.507  25.513  -3.936
ATOM   3373  H1  HOH A 436      27.533  25.267  -3.760
ATOM   3374  H2  HOH A 436      28.474  25.337  -4.931
ATOM   3375  O   HOH A 437      25.179   9.274   7.233
ATOM   3376  H1  HOH A 437      25.566   9.607   8.130
ATOM   3377  H2  HOH A 437      25.158  10.198   6.815
ATOM   3378  O   HOH A 438      27.194  22.761   7.048
ATOM   3379  H1  HOH A 438      27.474  22.146   6.308
ATOM   3380  H2  HOH A 438      26.335  22.302   7.291
ATOM   3381  O   HOH A 439      35.492  21.985  10.627
ATOM   3382  H1  HOH A 439      36.157  21.478  10.043
ATOM   3383  H2  HOH A 439      34.939  22.326   9.830
ATOM   3384  O   HOH A 440      34.473  21.272  -7.044
ATOM   3385  H1  HOH A 440      35.218  21.886  -6.986
ATOM   3386  H2  HOH A 440      34.614  20.762  -6.187
ATOM   3387  O   HOH A 441      27.633  18.134  -1.892
ATOM   3388  H1  HOH A 441      27.825  18.845  -2.597
ATOM   3389  H2  HOH A 441      28.414  18.387  -1.295
ATOM   3390  O   HOH A 442      38.660  13.312   3.889
ATOM   3391  H1  HOH A 442      39.280  12.524   3.810
ATOM   3392  H2  HOH A 442      39.210  13.949   3.320
ATOM   3393  O   HOH A 443      31.417  13.190  -1.661
ATOM   3394  H1  HOH A 443      30.751  13.650  -1.037
ATOM   3395  H2  HOH A 443      32.135  13.078  -0.950
ATOM   3396  O   HOH A 444      36.127  16.138   3.573
ATOM   3397  H1  HOH A 444      36.075  16.341   4.578
ATOM   3398  H2  HOH A 444      35.693  15.224   3.662
ATOM   3399  O   HOH A 445      38.745  16.335  -1.799
ATOM   3400  H1  HOH A 445      38.110  15.667  -2.268
ATOM   3401  H2  HOH A 445      38.683  17.019  -2.544
ATOM   3402  O   HOH A 446      33.900  13.449  -4.912
ATOM   3403  H1  HOH A 446      33.467  12.636  -5.309
ATOM   3404  H2  HOH A 446      33.067  13.805  -4.452
ATOM   3405  O   HOH A 447      34.679  19.948  -4.895
ATOM   3406  H1  HOH A 447      34.249  19.129  -5.323
ATOM   3407  H2  HOH A 447      35.255  19.412  -4.251
ATOM   3408  O   HOH A 448      30.170  16.565  -5.971
ATOM   3409  H1  HOH A 448      29.830  15.942  -5.253
ATOM   3410  H2  HOH A 448      30.625  17.214  -5.349
ATOM   3411  O   HOH A 449      31.411  27.168   2.139
ATOM   3412  H1  HOH A 449      31.419  28.142   2.420
ATOM   3413  H2  HOH A 449      31.602  27.340   1.162
ATOM   3414  O   HOH A 450      27.054  22.078  -2.923
ATOM   3415  H1  HOH A 450      26.213  21.848  -2.405
ATOM   3416  H2  HOH A 450      26.569  22.422  -3.743
ATOM   3417  O   HOH A 451      32.064  24.506   8.902
ATOM   3418  H1  HOH A 451      32.492  24.650   9.823
ATOM   3419  H2  HOH A 451      31.121  24.435   9.265
ATOM   3420  O   HOH A 452      37.151  20.707   9.250
ATOM   3421  H1  HOH A 452      37.930  20.198   9.649
ATOM   3422  H2  HOH A 452      37.656  21.070   8.456
ATOM   3423  O   HOH A 453      28.920  17.412   6.796
ATOM   3424  H1  HOH A 453      28.935  16.716   6.056
ATOM   3425  H2  HOH A 453      29.516  16.888   7.431
ATOM   3426  O   HOH A 454      33.429  22.180  -4.227
ATOM   3427  H1  HOH A 454      33.988  21.368  -4.254
ATOM   3428  H2  HOH A 454      33.564  22.452  -3.283
ATOM   3429  O   HOH A 455      34.244  19.056   7.364
ATOM   3430  H1  HOH A 455      33.643  19.889   7.351
ATOM   3431  H2  HOH A 455      34.801  19.355   6.570
ATOM   3432  O   HOH A 456      30.416  16.064   8.314
ATOM   3433  H1  HOH A 456      30.540  15.119   8.024
ATOM   3434  H2  HOH A 456      31.359  16.376   8.240
ATOM   3435  O   HOH A 457      31.551  18.135  -4.472
ATOM   3436  H1  HOH A 457      31.967  17.569  -3.727
ATOM   3437  H2  HOH A 457      32.384  18.120  -5.055
ATOM   3438  O   HOH A 458      29.282  13.294   5.351
ATOM   3439  H1  HOH A 458      28.573  12.605   5.161
ATOM   3440  H2  HOH A 458      29.930  13.002   4.641
ATOM   3441  O   HOH A 459      38.913  19.080   3.938
ATOM   3442  H1  HOH A 459      38.737  18.315   3.311
ATOM   3443  H2  HOH A 459      38.628  19.822   3.350
ATOM   3444  O   HOH A 460      39.201  15.501   8.779
ATOM   3445  H1  HOH A 460      39.792  16.071   8.250
ATOM   3446  H2  HOH A 460      39.200  16.053   9.630
ATOM   3447  O   HOH A 461      32.640   9.881   6.033
ATOM   3448  H1  HOH A 461      33.311   9.940   5.286
ATOM   3449  H2  HOH A 461      32.495   8.890   5.972
ATOM   3450  O   HOH A 462      36.218   8.924   5.339
ATOM   3451  H1  HOH A 462      35.385   9.169   4.805
ATOM   3452  H2  HOH A 462      36.266   9.847   5.804
ATOM   3453  O   HOH A 463      34.519  19.709   3.209
ATOM   3454  H1  HOH A 463      34.929  19.777   4.135
ATOM   3455  H2  HOH A 463      33.651  20.189   3.456
ATOM   3456  O   HOH A 464      35.938  16.583   6.001
ATOM   3457  H1  HOH A 464      36.329  16.032   6.762
ATOM   3458  H2  HOH A 464      36.628  17.330   6.068
ATOM   3459  O   HOH A 465      37.646  18.415   5.970
ATOM   3460  H1  HOH A 465      38.238  18.658   5.168
ATOM   3461  H2  HOH A 465      38.367  18.611   6.662
ATOM   3462  O   HOH A 466      31.752  14.959  -7.231
ATOM   3463  H1  HOH A 466      31.286  14.099  -6.992
ATOM   3464  H2  HOH A 466      31.093  15.578  -6.794
ATOM   3465  O   HOH A 467      34.163  24.742   5.095
ATOM   3466  H1  HOH A 467      33.596  25.275   5.731
ATOM   3467  H2  HOH A 467      33.681  25.066   4.244
ATOM   3468  O   HOH A 468      33.898  13.479   6.197
ATOM   3469  H1  HOH A 468      34.473  13.092   6.946
ATOM   3470  H2  HOH A 468      33.078  12.931   6.452
ATOM   3471  O   HOH A 469      37.871  13.318   6.262
ATOM   3472  H1  HOH A 469      38.174  13.399   5.293
ATOM   3473  H2  HOH A 469      38.683  12.810   6.578
ATOM   3474  O   HOH A 470      30.749  12.656  -6.811
ATOM   3475  H1  HOH A 470      30.776  12.401  -7.787
ATOM   3476  H2  HOH A 470      31.540  12.099  -6.522
ATOM   3477  O   HOH A 471      37.302  21.782   5.038
ATOM   3478  H1  HOH A 471      37.629  21.596   4.100
ATOM   3479  H2  HOH A 471      36.971  22.733   4.827
ATOM   3480  O   HOH A 472      34.439  11.315  -9.291
ATOM   3481  H1  HOH A 472      34.569  10.767  -8.455
ATOM   3482  H2  HOH A 472      33.571  10.881  -9.567
ATOM   3483  O   HOH A 473      30.565  20.352  -3.779
ATOM   3484  H1  HOH A 473      31.161  20.479  -2.976
ATOM   3485  H2  HOH A 473      30.960  19.459  -4.062
ATOM   3486  O   HOH A 474      26.712  24.669   0.134
ATOM   3487  H1  HOH A 474      27.448  24.128  -0.294
ATOM   3488  H2  HOH A 474      27.062  24.572   1.087
ATOM   3489  O   HOH A 475      33.386  22.938  -1.767
ATOM   3490  H1  HOH A 475      34.006  22.931  -0.973
ATOM   3491  H2  HOH A 475      32.923  23.799  -1.550
ATOM   3492  O   HOH A 476      27.535  24.576   2.475
ATOM   3493  H1  HOH A 476      28.186  23.939   2.941
ATOM   3494  H2  HOH A 476      28.123  25.396   2.615
ATOM   3495  O   HOH A 477      27.422  14.614  -0.600
ATOM   3496  H1  HOH A 477      26.595  14.058  -0.753
ATOM   3497  H2  HOH A 477      27.431  15.039  -1.528
ATOM   3498  O   HOH A 478      27.547  17.332   3.461
ATOM   3499  H1  HOH A 478      28.040  16.694   4.070
ATOM   3500  H2  HOH A 478      27.309  16.633   2.761
ATOM   3501  O   HOH A 479      25.259  11.590   6.220
ATOM   3502  H1  HOH A 479      24.441  11.930   5.731
ATOM   3503  H2  HOH A 479      25.228  12.280   6.958
ATOM   3504  O   HOH A 480      24.162  15.111  -3.956
ATOM   3505  H1  HOH A 480      24.965  15.643  -4.280
ATOM   3506  H2  HOH A 480      24.243  15.422  -2.987
ATOM   3507  O   HOH A 481      28.539  12.940  -5.662
ATOM   3508  H1  HOH A 481      29.445  12.758  -6.098
ATOM   3509  H2  HOH A 481      28.171  13.456  -6.461
ATOM   3510  O   HOH A 482      27.111  11.101  -4.676
ATOM   3511  H1  HOH A 482      27.217  10.486  -5.476
ATOM   3512  H2  HOH A 482      27.722  11.830  -5.041
ATOM   3513  O   HOH A 483      29.612   9.054   3.214
ATOM   3514  H1  HOH A 483      29.385   8.104   3.049
ATOM   3515  H2  HOH A 483      29.209   9.141   4.129
ATOM   3516  O   HOH A 484      26.471   7.885   5.623
ATOM   3517  H1  HOH A 484      25.912   8.403   6.307
ATOM   3518  H2  HOH A 484      25.926   8.158   4.829
ATOM   3519  O   HOH A 485      30.419  20.647   8.087
ATOM   3520  H1  HOH A 485      30.453  20.062   8.924
ATOM   3521  H2  HOH A 485      29.763  21.313   8.479
ATOM   3522  O   HOH A 486      32.920  25.387   3.071
ATOM   3523  H1  HOH A 486      32.308  26.119   2.736
ATOM   3524  H2  HOH A 486      32.711  24.725   2.348
ATOM   3525  O   HOH A 487      36.418  11.138   6.385
ATOM   3526  H1  HOH A 487      35.797  11.526   7.092
ATOM   3527  H2  HOH A 487      36.932  11.984   6.233
ATOM   3528  O   HOH A 488      39.758  11.859   7.154
ATOM   3529  H1  HOH A 488      39.333  10.933   7.252
ATOM   3530  H2  HOH A 488      40.560  11.516   6.632
ATOM   3531  O   HOH A 489      28.524   9.319   5.548
ATOM   3532  H1  HOH A 489      27.704   8.720   5.568
ATOM   3533  H2  HOH A 489      28.916   8.977   6.410
ATOM   3534  O   HOH A 490      30.629  24.358   5.323
ATOM   3535  H1  HOH A 490      29.952  25.128   5.409
ATOM   3536  H2  HOH A 490      30.059  23.843   4.659
ATOM   3537  O   HOH A 491      40.012  11.151   3.841
ATOM   3538  H1  HOH A 491      39.441  10.375   4.159
ATOM   3539  H2  HOH A 491      40.722  11.039   4.555
ATOM   3540  O   HOH A 492      39.803  11.524   1.325
ATOM   3541  H1  HOH A 492      39.962  11.385   2.308
ATOM   3542  H2  HOH A 492      39.768  10.553   1.072
ATOM   3543  O   HOH A 493      29.157  23.066   3.656
ATOM   3544  H1  HOH A 493      28.749  22.302   4.156
ATOM   3545  H2  HOH A 493      29.755  22.536   3.053
ATOM   3546  O   HOH A 494      32.475  23.707   1.187
ATOM   3547  H1  HOH A 494      32.286  24.235   0.344
ATOM   3548  H2  HOH A 494      33.382  23.370   0.899
ATOM   3549  O   HOH A 495      34.756  22.919   0.379
ATOM   3550  H1  HOH A 495      35.539  23.489   0.500
ATOM   3551  H2  HOH A 495      35.152  22.062   0.754
ATOM   3552  O   HOH A 496      38.671   9.194   4.775
ATOM   3553  H1  HOH A 496      38.842   9.284   5.771
ATOM   3554  H2  HOH A 496      37.667   9.058   4.879
ATOM   3555  O   HOH A 497      29.688  25.346  -1.736
ATOM   3556  H1  HOH A 497      29.184  24.517  -1.433
ATOM   3557  H2  HOH A 497      29.278  25.350  -2.671
ATOM   3558  O   HOH A 498      27.498  11.059  -2.159
ATOM   3559  H1  HOH A 498      26.812  11.709  -1.947
ATOM   3560  H2  HOH A 498      27.362  11.006  -3.158
ATOM   3561  O   HOH A 499      33.205  12.803   0.075
ATOM   3562  H1  HOH A 499      32.650  12.262   0.740
ATOM   3563  H2  HOH A 499      33.952  12.124   0.006
ATOM   3564  O   HOH A 500      37.287  11.384  -1.479
ATOM   3565  H1  HOH A 500      36.958  11.912  -2.251
ATOM   3566  H2  HOH A 500      37.921  12.078  -1.105
ATOM   3567  O   HOH A 501      29.144  27.755  -6.464
ATOM   3568  H1  HOH A 501      29.962  27.714  -6.989
ATOM   3569  H2  HOH A 501      28.895  26.765  -6.517
ATOM   3570  O   HOH A 502      32.752  11.330  -5.962
ATOM   3571  H1  HOH A 502      33.437  10.784  -6.467
ATOM   3572  H2  HOH A 502      32.324  10.552  -5.484
ATOM   3573  O   HOH A 503      31.513  10.918  -2.694
ATOM   3574  H1  HOH A 503      30.757  10.571  -2.100
ATOM   3575  H2  HOH A 503      31.457  11.870  -2.334
ATOM   3576  O   HOH A 504      35.541  25.439  11.341
ATOM   3577  H1  HOH A 504      35.256  26.436  11.297
ATOM   3578  H2  HOH A 504      36.140  25.461  10.574
ATOM   3579  O   HOH A 505      31.716   7.289   8.172
ATOM   3580  H1  HOH A 505      32.234   6.473   8.470
ATOM   3581  H2  HOH A 505      32.101   7.316   7.234
ATOM   3582  O   HOH A 506      32.090  20.775  -1.749
ATOM   3583  H1  HOH A 506      32.590  21.660  -1.776
ATOM   3584  H2  HOH A 506      32.949  20.209  -1.707
ATOM   3585  O   HOH A 507      38.737   9.568   7.319
ATOM   3586  H1  HOH A 507      39.060   9.041   8.123
ATOM   3587  H2  HOH A 507      37.792   9.624   7.563
ATOM   3588  O   HOH A 508      26.584  16.731 -14.686
ATOM   3589  H1  HOH A 508      27.324  17.116 -14.122
ATOM   3590  H2  HOH A 508      25.820  17.184 -14.217
ATOM   3591  O   HOH A 509      25.716  16.459 -17.045
ATOM   3592  H1  HOH A 509      26.081  16.590 -16.116
ATOM   3593  H2  HOH A 509      26.549  16.359 -17.528
ATOM   3594  O   HOH A 510      32.155  10.278  -9.766
ATOM   3595  H1  HOH A 510      31.574  11.097  -9.601
ATOM   3596  H2  HOH A 510      31.627   9.948 -10.569
ATOM   3597  O   HOH A 511      30.207  21.849  -9.026
ATOM   3598  H1  HOH A 511      31.000  21.475  -8.496
ATOM   3599  H2  HOH A 511      30.510  21.444  -9.910
ATOM   3600  O   HOH A 512      28.958  19.196 -11.531
ATOM   3601  H1  HOH A 512      29.749  19.796 -11.385
ATOM   3602  H2  HOH A 512      28.644  19.159 -10.588
ATOM   3603  O   HOH A 513      32.131  14.578  -9.749
ATOM   3604  H1  HOH A 513      32.052  14.764  -8.770
ATOM   3605  H2  HOH A 513      33.071  14.224  -9.741
ATOM   3606  O   HOH A 514      34.527  13.706  -9.841
ATOM   3607  H1  HOH A 514      34.520  12.708  -9.570
ATOM   3608  H2  HOH A 514      34.949  13.579 -10.712
ATOM   3609  O   HOH A 515      28.485  11.306 -14.610
ATOM   3610  H1  HOH A 515      28.679  12.200 -14.230
ATOM   3611  H2  HOH A 515      27.578  11.495 -14.979
ATOM   3612  O   HOH A 516      27.689  21.693  -9.161
ATOM   3613  H1  HOH A 516      27.774  20.685  -9.163
ATOM   3614  H2  HOH A 516      28.693  21.862  -9.117
ATOM   3615  O   HOH A 517      32.495  18.730 -10.509
ATOM   3616  H1  HOH A 517      32.176  17.820 -10.880
ATOM   3617  H2  HOH A 517      33.472  18.415 -10.418
ATOM   3618  O   HOH A 518      32.093  18.538  -8.023
ATOM   3619  H1  HOH A 518      32.063  19.548  -7.863
ATOM   3620  H2  HOH A 518      32.302  18.613  -9.011
ATOM   3621  O   HOH A 519      29.460  15.578 -11.922
ATOM   3622  H1  HOH A 519      29.035  16.279 -12.497
ATOM   3623  H2  HOH A 519      29.205  14.785 -12.493
ATOM   3624  O   HOH A 520      26.103  22.559  -7.413
ATOM   3625  H1  HOH A 520      26.811  22.240  -8.069
ATOM   3626  H2  HOH A 520      26.215  23.546  -7.644
ATOM   3627  O   HOH A 521      32.089  20.997  -7.631
ATOM   3628  H1  HOH A 521      31.799  21.417  -6.749
ATOM   3629  H2  HOH A 521      33.092  21.154  -7.459
ATOM   3630  O   HOH A 522      27.943  19.130  -9.131
ATOM   3631  H1  HOH A 522      28.675  18.533  -8.729
ATOM   3632  H2  HOH A 522      27.268  18.916  -8.387
ATOM   3633  O   HOH A 523      29.733  17.654  -8.185
ATOM   3634  H1  HOH A 523      29.793  17.196  -7.271
ATOM   3635  H2  HOH A 523      30.690  18.004  -8.151
ATOM   3636  O   HOH A 524      34.781  17.895 -10.132
ATOM   3637  H1  HOH A 524      34.960  17.074  -9.549
ATOM   3638  H2  HOH A 524      35.700  18.133 -10.318
ATOM   3639  O   HOH A 525      30.747  12.288  -9.318
ATOM   3640  H1  HOH A 525      29.807  12.181  -9.672
ATOM   3641  H2  HOH A 525      30.951  13.168  -9.710
ATOM   3642  O   HOH A 526      33.566  17.966  -5.993
ATOM   3643  H1  HOH A 526      33.065  18.125  -6.856
ATOM   3644  H2  HOH A 526      33.853  17.023  -6.203
ATOM   3645  O   HOH A 527      31.023  20.641 -11.091
ATOM   3646  H1  HOH A 527      31.655  19.869 -10.848
ATOM   3647  H2  HOH A 527      31.607  21.079 -11.737
ATOM   3648  O   HOH A 528      28.954  15.448  -9.358
ATOM   3649  H1  HOH A 528      29.155  15.520 -10.330
ATOM   3650  H2  HOH A 528      29.310  16.326  -9.063
ATOM   3651  O   HOH A 529      28.633  13.610 -13.326
ATOM   3652  H1  HOH A 529      28.065  13.065 -12.680
ATOM   3653  H2  HOH A 529      27.841  13.942 -13.868
ATOM   3654  O   HOH A 530      31.317  22.068  -5.509
ATOM   3655  H1  HOH A 530      32.198  22.205  -4.991
ATOM   3656  H2  HOH A 530      30.924  21.439  -4.819
ATOM   3657  O   HOH A 531      28.473   9.313 -10.638
ATOM   3658  H1  HOH A 531      28.546   8.909  -9.700
ATOM   3659  H2  HOH A 531      27.612   8.844 -10.878
ATOM   3660  O   HOH A 532      34.359   9.812  -7.242
ATOM   3661  H1  HOH A 532      34.859   9.103  -6.713
ATOM   3662  H2  HOH A 532      33.683   9.158  -7.636
ATOM   3663  O   HOH A 533      28.785  -3.893  30.373
ATOM   3664  H1  HOH A 533      29.197  -3.920  29.446
ATOM   3665  H2  HOH A 533      29.607  -3.853  30.891
ATOM   3666  O   HOH A 534      26.261   0.288  27.988
ATOM   3667  H1  HOH A 534      26.151   0.453  26.992
ATOM   3668  H2  HOH A 534      26.163   1.273  28.245
ATOM   3669  O   HOH A 535      26.960  -2.155  30.655
ATOM   3670  H1  HOH A 535      27.532  -1.405  30.289
ATOM   3671  H2  HOH A 535      27.679  -2.865  30.603
ATOM   3672  O   HOH A 536      26.892   1.555  32.508
ATOM   3673  H1  HOH A 536      26.296   2.093  31.873
ATOM   3674  H2  HOH A 536      26.137   1.058  32.940
ATOM   3675  O   HOH A 537      32.720   5.060  29.127
ATOM   3676  H1  HOH A 537      33.599   4.660  29.249
ATOM   3677  H2  HOH A 537      32.959   5.663  28.331
ATOM   3678  O   HOH A 538      24.926  -5.014  24.710
ATOM   3679  H1  HOH A 538      24.763  -4.220  24.081
ATOM   3680  H2  HOH A 538      25.372  -4.454  25.426
ATOM   3681  O   HOH A 539      29.717  -3.987  28.022
ATOM   3682  H1  HOH A 539      30.424  -4.529  27.543
ATOM   3683  H2  HOH A 539      28.929  -4.522  27.631
ATOM   3684  O   HOH A 540      28.907   1.574  30.894
ATOM   3685  H1  HOH A 540      28.617   0.772  30.343
ATOM   3686  H2  HOH A 540      28.170   1.498  31.577
ATOM   3687  O   HOH A 541      25.587  -2.182  28.469
ATOM   3688  H1  HOH A 541      26.066  -2.201  29.353
ATOM   3689  H2  HOH A 541      25.746  -1.209  28.272
ATOM   3690  O   HOH A 542      27.572   6.414  24.665
ATOM   3691  H1  HOH A 542      27.668   5.399  24.717
ATOM   3692  H2  HOH A 542      27.748   6.551  25.668
ATOM   3693  O   HOH A 543      30.538   3.955  28.535
ATOM   3694  H1  HOH A 543      31.439   4.407  28.712
ATOM   3695  H2  HOH A 543      30.256   4.007  29.531
ATOM   3696  O   HOH A 544      28.218  -0.360  29.407
ATOM   3697  H1  HOH A 544      27.446  -0.057  28.813
ATOM   3698  H2  HOH A 544      28.742  -0.792  28.654
ATOM   3699  O   HOH A 545      29.359  -1.548  27.455
ATOM   3700  H1  HOH A 545      29.571  -2.516  27.672
ATOM   3701  H2  HOH A 545      28.853  -1.750  26.601
ATOM   3702  O   HOH A 546      26.163  -3.510  26.359
ATOM   3703  H1  HOH A 546      25.905  -3.049  27.214
ATOM   3704  H2  HOH A 546      26.797  -4.180  26.764
ATOM   3705  O   HOH A 547      26.135   2.739  28.543
ATOM   3706  H1  HOH A 547      25.563   3.378  27.979
ATOM   3707  H2  HOH A 547      26.982   3.320  28.428
ATOM   3708  O   HOH A 548      33.276   6.465  27.179
ATOM   3709  H1  HOH A 548      34.201   6.562  26.732
ATOM   3710  H2  HOH A 548      33.178   7.453  27.383
ATOM   3711  O   HOH A 549      35.402   2.199  20.830
ATOM   3712  H1  HOH A 549      35.840   1.590  21.529
ATOM   3713  H2  HOH A 549      35.218   2.956  21.476
ATOM   3714  O   HOH A 550      31.387  -5.437  26.723
ATOM   3715  H1  HOH A 550      32.049  -5.942  27.227
ATOM   3716  H2  HOH A 550      31.225  -6.101  25.979
ATOM   3717  O   HOH A 551      32.282  -4.248  23.214
ATOM   3718  H1  HOH A 551      32.316  -5.220  22.953
ATOM   3719  H2  HOH A 551      31.422  -4.058  22.683
ATOM   3720  O   HOH A 552      30.780   1.440  28.939
ATOM   3721  H1  HOH A 552      30.719   2.418  28.744
ATOM   3722  H2  HOH A 552      30.211   1.421  29.746
ATOM   3723  O   HOH A 553      28.075   3.021  34.203
ATOM   3724  H1  HOH A 553      27.663   2.401  33.530
ATOM   3725  H2  HOH A 553      28.330   3.754  33.581
ATOM   3726  O   HOH A 554      25.197  -1.704  32.429
ATOM   3727  H1  HOH A 554      24.629  -2.484  32.142
ATOM   3728  H2  HOH A 554      25.936  -1.857  31.756
ATOM   3729  O   HOH A 555      27.119  -5.853  30.220
ATOM   3730  H1  HOH A 555      26.522  -5.686  31.008
ATOM   3731  H2  HOH A 555      27.752  -5.097  30.363
ATOM   3732  O   HOH A 556      27.837  -5.257  27.067
ATOM   3733  H1  HOH A 556      28.129  -5.657  26.195
ATOM   3734  H2  HOH A 556      27.238  -6.003  27.368
ATOM   3735  O   HOH A 557      28.733  -6.054  24.820
ATOM   3736  H1  HOH A 557      29.609  -6.541  24.788
ATOM   3737  H2  HOH A 557      28.141  -6.878  24.712
ATOM   3738  O   HOH A 558      26.057   8.744  33.568
ATOM   3739  H1  HOH A 558      25.793   9.589  34.052
ATOM   3740  H2  HOH A 558      25.472   8.122  34.107
ATOM   3741  O   HOH A 559      28.430   5.051  32.609
ATOM   3742  H1  HOH A 559      28.419   5.931  33.105
ATOM   3743  H2  HOH A 559      27.462   5.115  32.290
ATOM   3744  O   HOH A 560      32.879   8.910  27.720
ATOM   3745  H1  HOH A 560      32.679   9.389  28.597
ATOM   3746  H2  HOH A 560      31.912   8.979  27.378
ATOM   3747  O   HOH A 561      29.879   3.960  30.904
ATOM   3748  H1  HOH A 561      29.279   4.391  31.607
ATOM   3749  H2  HOH A 561      29.483   3.035  30.992
ATOM   3750  O   HOH A 562      37.333  -2.781  14.950
ATOM   3751  H1  HOH A 562      38.073  -3.407  15.065
ATOM   3752  H2  HOH A 562      37.482  -2.582  13.961
ATOM   3753  O   HOH A 563      37.063  -0.445  16.007
ATOM   3754  H1  HOH A 563      36.395  -0.706  16.720
ATOM   3755  H2  HOH A 563      37.195  -1.373  15.637
ATOM   3756  O   HOH A 564      30.032   1.903  19.012
ATOM   3757  H1  HOH A 564      29.069   1.548  19.033
ATOM   3758  H2  HOH A 564      30.392   1.181  19.633
ATOM   3759  O   HOH A 565      30.172   5.350  16.593
ATOM   3760  H1  HOH A 565      30.142   6.157  17.176
ATOM   3761  H2  HOH A 565      29.329   5.524  16.080
ATOM   3762  O   HOH A 566      27.013  -5.072  12.395
ATOM   3763  H1  HOH A 566      27.201  -4.446  13.168
ATOM   3764  H2  HOH A 566      27.752  -4.718  11.799
ATOM   3765  O   HOH A 567      30.147  -1.465  15.134
ATOM   3766  H1  HOH A 567      29.349  -1.810  15.652
ATOM   3767  H2  HOH A 567      29.602  -0.946  14.452
ATOM   3768  O   HOH A 568      33.045   6.631  17.109
ATOM   3769  H1  HOH A 568      32.879   7.345  17.794
ATOM   3770  H2  HOH A 568      34.008   6.866  16.922
ATOM   3771  O   HOH A 569      32.639   4.691  18.654
ATOM   3772  H1  HOH A 569      33.260   4.039  18.186
ATOM   3773  H2  HOH A 569      32.720   5.414  17.943
ATOM   3774  O   HOH A 570      27.202  -5.988  18.410
ATOM   3775  H1  HOH A 570      27.179  -5.760  19.397
ATOM   3776  H2  HOH A 570      26.501  -5.306  18.131
ATOM   3777  O   HOH A 571      35.177  -3.380  16.179
ATOM   3778  H1  HOH A 571      36.056  -3.214  15.703
ATOM   3779  H2  HOH A 571      34.608  -3.295  15.334
ATOM   3780  O   HOH A 572      31.448  -5.710  13.661
ATOM   3781  H1  HOH A 572      31.548  -4.695  13.751
ATOM   3782  H2  HOH A 572      30.549  -5.716  14.170
ATOM   3783  O   HOH A 573      28.239  -2.463  16.468
ATOM   3784  H1  HOH A 573      28.812  -2.902  17.172
ATOM   3785  H2  HOH A 573      27.536  -2.106  17.089
ATOM   3786  O   HOH A 574      32.248  -2.752  18.068
ATOM   3787  H1  HOH A 574      32.789  -2.264  18.780
ATOM   3788  H2  HOH A 574      32.858  -3.556  18.024
ATOM   3789  O   HOH A 575      29.562  -6.580  21.102
ATOM   3790  H1  HOH A 575      28.653  -6.141  20.994
ATOM   3791  H2  HOH A 575      29.234  -7.519  20.925
ATOM   3792  O   HOH A 576      39.679  -0.460  12.512
ATOM   3793  H1  HOH A 576      40.532  -0.592  12.961
ATOM   3794  H2  HOH A 576      39.375   0.366  13.022
ATOM   3795  O   HOH A 577      32.880   1.579  23.218
ATOM   3796  H1  HOH A 577      32.776   2.595  23.202
ATOM   3797  H2  HOH A 577      32.138   1.453  23.913
ATOM   3798  O   HOH A 578      29.419  -5.838  17.307
ATOM   3799  H1  HOH A 578      29.626  -4.915  17.683
ATOM   3800  H2  HOH A 578      28.522  -5.924  17.790
ATOM   3801  O   HOH A 579      32.469   4.057  23.249
ATOM   3802  H1  HOH A 579      32.311   4.568  24.112
ATOM   3803  H2  HOH A 579      31.630   4.394  22.789
ATOM   3804  O   HOH A 580      34.333 -10.366  15.809
ATOM   3805  H1  HOH A 580      34.906 -11.115  16.018
ATOM   3806  H2  HOH A 580      33.499 -10.861  15.546
ATOM   3807  O   HOH A 581      38.837   1.303  16.460
ATOM   3808  H1  HOH A 581      38.103   0.619  16.322
ATOM   3809  H2  HOH A 581      39.481   0.735  16.912
ATOM   3810  O   HOH A 582      39.291   5.592  16.190
ATOM   3811  H1  HOH A 582      39.035   4.737  16.721
ATOM   3812  H2  HOH A 582      38.736   5.341  15.382
ATOM   3813  O   HOH A 583      37.854  -2.242  12.545
ATOM   3814  H1  HOH A 583      38.625  -1.600  12.448
ATOM   3815  H2  HOH A 583      38.006  -2.740  11.682
ATOM   3816  O   HOH A 584      34.778  -5.080  12.681
ATOM   3817  H1  HOH A 584      34.473  -4.257  13.183
ATOM   3818  H2  HOH A 584      34.769  -5.706  13.431
ATOM   3819  O   HOH A 585      31.825  -0.561  16.748
ATOM   3820  H1  HOH A 585      31.186  -0.935  16.047
ATOM   3821  H2  HOH A 585      31.952  -1.432  17.236
ATOM   3822  O   HOH A 586      33.271   0.750  20.867
ATOM   3823  H1  HOH A 586      33.143   1.075  21.823
ATOM   3824  H2  HOH A 586      34.078   1.328  20.682
ATOM   3825  O   HOH A 587      29.850  -3.495  18.153
ATOM   3826  H1  HOH A 587      30.837  -3.245  18.049
ATOM   3827  H2  HOH A 587      29.748  -2.969  19.029
ATOM   3828  O   HOH A 588      31.221   0.054  26.932
ATOM   3829  H1  HOH A 588      31.099   0.602  27.792
ATOM   3830  H2  HOH A 588      30.476  -0.603  27.156
ATOM   3831  O   HOH A 589      39.649   0.428  10.089
ATOM   3832  H1  HOH A 589      39.655   0.152  11.052
ATOM   3833  H2  HOH A 589      39.718  -0.507   9.707
ATOM   3834  O   HOH A 590      30.798   0.123  20.630
ATOM   3835  H1  HOH A 590      31.761   0.355  20.779
ATOM   3836  H2  HOH A 590      30.461   0.388  21.548
ATOM   3837  O   HOH A 591      34.021   5.708  20.531
ATOM   3838  H1  HOH A 591      34.887   5.762  20.013
ATOM   3839  H2  HOH A 591      33.473   5.283  19.798
ATOM   3840  O   HOH A 592      31.960   5.447  25.293
ATOM   3841  H1  HOH A 592      32.476   5.813  26.095
ATOM   3842  H2  HOH A 592      32.060   6.290  24.741
ATOM   3843  O   HOH A 593      29.988  -2.047  11.993
ATOM   3844  H1  HOH A 593      29.461  -1.332  12.473
ATOM   3845  H2  HOH A 593      30.709  -1.438  11.638
ATOM   3846  O   HOH A 594      27.055   2.823  20.701
ATOM   3847  H1  HOH A 594      27.307   3.604  20.113
ATOM   3848  H2  HOH A 594      27.304   2.100  20.039
ATOM   3849  O   HOH A 595      27.299   4.157  17.044
ATOM   3850  H1  HOH A 595      27.535   4.770  16.269
ATOM   3851  H2  HOH A 595      27.585   3.303  16.591
ATOM   3852  O   HOH A 596      36.384   7.543  22.882
ATOM   3853  H1  HOH A 596      36.340   6.641  23.317
ATOM   3854  H2  HOH A 596      36.328   8.090  23.719
ATOM   3855  O   HOH A 597      38.177   7.306  13.093
ATOM   3856  H1  HOH A 597      37.704   8.213  12.993
ATOM   3857  H2  HOH A 597      39.033   7.719  13.459
ATOM   3858  O   HOH A 598      34.115   7.970  13.701
ATOM   3859  H1  HOH A 598      33.260   7.629  14.142
ATOM   3860  H2  HOH A 598      34.682   7.178  13.979
ATOM   3861  O   HOH A 599      40.838   7.547  16.150
ATOM   3862  H1  HOH A 599      40.263   6.704  16.175
ATOM   3863  H2  HOH A 599      41.680   7.144  16.422
ATOM   3864  O   HOH A 600      35.424   7.350  16.593
ATOM   3865  H1  HOH A 600      35.545   6.810  15.749
ATOM   3866  H2  HOH A 600      36.353   7.184  16.963
ATOM   3867  O   HOH A 601      25.969   0.072  22.082
ATOM   3868  H1  HOH A 601      26.479  -0.367  21.355
ATOM   3869  H2  HOH A 601      26.686   0.079  22.777
ATOM   3870  O   HOH A 602      30.676  -8.012  17.165
ATOM   3871  H1  HOH A 602      30.204  -7.112  17.227
ATOM   3872  H2  HOH A 602      31.571  -7.668  17.490
ATOM   3873  O   HOH A 603      31.722  -6.664  22.402
ATOM   3874  H1  HOH A 603      30.837  -6.637  21.892
ATOM   3875  H2  HOH A 603      32.245  -7.044  21.607
ATOM   3876  O   HOH A 604      33.665  -8.063  11.152
ATOM   3877  H1  HOH A 604      33.365  -8.092  12.116
ATOM   3878  H2  HOH A 604      32.948  -8.676  10.795
ATOM   3879  O   HOH A 605      32.934  -7.036  17.861
ATOM   3880  H1  HOH A 605      33.293  -6.094  17.842
ATOM   3881  H2  HOH A 605      33.460  -7.356  17.045
ATOM   3882  O   HOH A 606      31.391  -3.206  13.806
ATOM   3883  H1  HOH A 606      30.943  -2.556  14.458
ATOM   3884  H2  HOH A 606      30.880  -2.857  13.001
ATOM   3885  O   HOH A 607      39.684  -1.921   9.183
ATOM   3886  H1  HOH A 607      39.087  -2.564   9.697
ATOM   3887  H2  HOH A 607      40.432  -2.522   9.025
ATOM   3888  O   HOH A 608      33.229  -1.036  25.764
ATOM   3889  H1  HOH A 608      32.858  -1.985  25.749
ATOM   3890  H2  HOH A 608      32.472  -0.632  26.281
ATOM   3891  O   HOH A 609      38.042  -3.452  10.307
ATOM   3892  H1  HOH A 609      37.599  -4.318  10.661
ATOM   3893  H2  HOH A 609      37.483  -3.443   9.456
ATOM   3894  O   HOH A 610      27.303  -5.459  20.874
ATOM   3895  H1  HOH A 610      27.052  -4.509  21.132
ATOM   3896  H2  HOH A 610      26.827  -5.875  21.691
ATOM   3897  O   HOH A 611      29.278  -5.561  14.822
ATOM   3898  H1  HOH A 611      29.302  -5.743  15.815
ATOM   3899  H2  HOH A 611      28.605  -6.266  14.579
ATOM   3900  O   HOH A 612      35.260  -1.241  17.639
ATOM   3901  H1  HOH A 612      34.754  -1.424  18.484
ATOM   3902  H2  HOH A 612      35.146  -2.134  17.210
ATOM   3903  O   HOH A 613      33.958  -4.676  17.938
ATOM   3904  H1  HOH A 613      34.692  -4.796  18.567
ATOM   3905  H2  HOH A 613      34.481  -4.221  17.193
ATOM   3906  O   HOH A 614      27.578  -3.703  14.417
ATOM   3907  H1  HOH A 614      27.810  -3.158  15.253
ATOM   3908  H2  HOH A 614      28.307  -4.393  14.576
ATOM   3909  O   HOH A 615      33.863  -3.112  14.061
ATOM   3910  H1  HOH A 615      32.843  -3.216  14.004
ATOM   3911  H2  HOH A 615      33.835  -2.130  13.777
ATOM   3912  O   HOH A 616      33.595  -0.769  13.188
ATOM   3913  H1  HOH A 616      32.936  -0.763  12.428
ATOM   3914  H2  HOH A 616      34.429  -0.816  12.625
ATOM   3915  O   HOH A 617      29.732   0.774  22.814
ATOM   3916  H1  HOH A 617      28.920   0.395  23.298
ATOM   3917  H2  HOH A 617      30.243   1.002  23.666
ATOM   3918  O   HOH A 618      33.708  -1.521  19.719
ATOM   3919  H1  HOH A 618      33.735  -1.976  20.648
ATOM   3920  H2  HOH A 618      33.544  -0.598  20.108
ATOM   3921  O   HOH A 619      31.094  -9.219  14.916
ATOM   3922  H1  HOH A 619      30.856  -8.776  15.784
ATOM   3923  H2  HOH A 619      30.194  -9.143  14.477
ATOM   3924  O   HOH A 620      29.718  -2.131  20.230
ATOM   3925  H1  HOH A 620      28.800  -1.729  20.313
ATOM   3926  H2  HOH A 620      30.222  -1.256  20.359
ATOM   3927  O   HOH A 621      31.590   3.723  15.354
ATOM   3928  H1  HOH A 621      31.228   2.919  15.865
ATOM   3929  H2  HOH A 621      31.035   4.404  15.886
ATOM   3930  O   HOH A 622      36.804  -5.419  11.122
ATOM   3931  H1  HOH A 622      36.478  -6.254  10.682
ATOM   3932  H2  HOH A 622      36.030  -5.282  11.741
ATOM   3933  O   HOH A 623      36.283   5.814  19.407
ATOM   3934  H1  HOH A 623      36.872   6.199  18.687
ATOM   3935  H2  HOH A 623      36.456   4.845  19.193
ATOM   3936  O   HOH A 624      30.637   1.742  16.591
ATOM   3937  H1  HOH A 624      31.128   0.869  16.671
ATOM   3938  H2  HOH A 624      30.442   1.842  17.585
ATOM   3939  O   HOH A 625      36.531   0.771  13.830
ATOM   3940  H1  HOH A 625      36.684   0.327  14.729
ATOM   3941  H2  HOH A 625      37.464   1.154  13.753
ATOM   3942  O   HOH A 626      27.293  -1.272  20.281
ATOM   3943  H1  HOH A 626      27.011  -2.084  20.825
ATOM   3944  H2  HOH A 626      26.830  -1.552  19.425
ATOM   3945  O   HOH A 627      28.390  -3.863  23.626
ATOM   3946  H1  HOH A 627      28.525  -4.764  24.074
ATOM   3947  H2  HOH A 627      29.174  -3.948  22.991
ATOM   3948  O   HOH A 628      36.218   5.275  24.022
ATOM   3949  H1  HOH A 628      35.633   4.784  23.345
ATOM   3950  H2  HOH A 628      36.891   4.583  24.140
ATOM   3951  O   HOH A 629      38.525   3.627  17.416
ATOM   3952  H1  HOH A 629      38.630   2.691  17.061
ATOM   3953  H2  HOH A 629      37.715   3.448  17.987
ATOM   3954  O   HOH A 630      38.930   1.583  13.760
ATOM   3955  H1  HOH A 630      39.077   1.819  14.705
ATOM   3956  H2  HOH A 630      39.104   2.488  13.349
ATOM   3957  O   HOH A 631      34.323   3.227  17.413
ATOM   3958  H1  HOH A 631      34.315   3.481  16.435
ATOM   3959  H2  HOH A 631      34.141   2.225  17.237
ATOM   3960  O   HOH A 632      36.665   8.095  20.488
ATOM   3961  H1  HOH A 632      36.533   7.887  21.480
ATOM   3962  H2  HOH A 632      36.489   7.168  20.160
ATOM   3963  O   HOH A 633      28.910 -11.471  12.922
ATOM   3964  H1  HOH A 633      28.431 -11.784  13.761
ATOM   3965  H2  HOH A 633      28.912 -10.484  13.185
ATOM   3966  O   HOH A 634      36.414   3.332  18.802
ATOM   3967  H1  HOH A 634      35.572   3.247  18.237
ATOM   3968  H2  HOH A 634      36.047   2.811  19.592
ATOM   3969  O   HOH A 635      39.342   3.771  12.566
ATOM   3970  H1  HOH A 635      38.898   3.994  11.669
ATOM   3971  H2  HOH A 635      40.262   3.935  12.291
ATOM   3972  O   HOH A 636      26.222  -6.331  22.935
ATOM   3973  H1  HOH A 636      26.601  -7.035  23.546
ATOM   3974  H2  HOH A 636      25.691  -5.847  23.640
ATOM   3975  O   HOH A 637      28.663   3.054  22.621
ATOM   3976  H1  HOH A 637      29.063   2.130  22.586
ATOM   3977  H2  HOH A 637      27.982   2.908  21.886
ATOM   3978  O   HOH A 638      34.774   4.153  22.323
ATOM   3979  H1  HOH A 638      33.836   4.098  22.731
ATOM   3980  H2  HOH A 638      34.495   4.826  21.603
ATOM   3981  O   HOH A 639      32.800   3.073  11.857
ATOM   3982  H1  HOH A 639      32.844   2.412  11.083
ATOM   3983  H2  HOH A 639      33.410   2.545  12.466
ATOM   3984  O   HOH A 640      28.117   2.045  15.929
ATOM   3985  H1  HOH A 640      29.088   1.894  16.136
ATOM   3986  H2  HOH A 640      28.242   2.119  14.918
ATOM   3987  O   HOH A 641      38.278   4.473  10.437
ATOM   3988  H1  HOH A 641      38.032   5.466  10.487
ATOM   3989  H2  HOH A 641      37.446   4.217   9.893
ATOM   3990  O   HOH A 642      33.916   0.837  17.007
ATOM   3991  H1  HOH A 642      34.506   0.061  17.245
ATOM   3992  H2  HOH A 642      33.072   0.295  16.873
ATOM   3993  O   HOH A 643      33.695  -2.418  22.023
ATOM   3994  H1  HOH A 643      33.945  -1.764  22.727
ATOM   3995  H2  HOH A 643      33.232  -3.090  22.587
ATOM   3996  O   HOH A 644      35.449   5.937  14.500
ATOM   3997  H1  HOH A 644      36.333   5.486  14.339
ATOM   3998  H2  HOH A 644      34.916   5.089  14.647
ATOM   3999  O   HOH A 645      30.844  -5.776  11.235
ATOM   4000  H1  HOH A 645      31.098  -5.767  12.221
ATOM   4001  H2  HOH A 645      31.788  -5.644  10.897
ATOM   4002  O   HOH A 646      32.028  -0.702  11.183
ATOM   4003  H1  HOH A 646      32.468  -1.226  10.422
ATOM   4004  H2  HOH A 646      32.239   0.204  10.791
ATOM   4005  O   HOH A 647      28.563   2.208  13.485
ATOM   4006  H1  HOH A 647      28.085   2.354  12.616
ATOM   4007  H2  HOH A 647      29.385   2.775  13.250
ATOM   4008  O   HOH A 648      32.573   8.527  18.782
ATOM   4009  H1  HOH A 648      33.359   8.991  18.326
ATOM   4010  H2  HOH A 648      31.997   9.370  18.821
ATOM   4011  O   HOH A 649      28.007   5.749  15.256
ATOM   4012  H1  HOH A 649      27.700   6.739  15.325
ATOM   4013  H2  HOH A 649      28.200   5.823  14.249
ATOM   4014  O   HOH A 650      28.016   4.322  28.156
ATOM   4015  H1  HOH A 650      28.998   4.225  28.284
ATOM   4016  H2  HOH A 650      28.018   5.226  27.737
ATOM   4017  O   HOH A 651      32.762   5.505  11.313
ATOM   4018  H1  HOH A 651      32.809   4.514  11.543
ATOM   4019  H2  HOH A 651      32.879   5.358  10.306
ATOM   4020  O   HOH A 652      27.667  -0.001  24.023
ATOM   4021  H1  HOH A 652      27.838  -0.843  24.569
ATOM   4022  H2  HOH A 652      26.973   0.377  24.665
ATOM   4023  O   HOH A 653      30.620   3.470  13.042
ATOM   4024  H1  HOH A 653      31.483   3.321  12.546
ATOM   4025  H2  HOH A 653      31.034   3.636  13.946
ATOM   4026  O   HOH A 654      34.335  -0.467  23.641
ATOM   4027  H1  HOH A 654      33.946  -0.704  24.565
ATOM   4028  H2  HOH A 654      33.763   0.360  23.524
ATOM   4029  O   HOH A 655      35.829  -0.794  12.007
ATOM   4030  H1  HOH A 655      36.155  -0.116  12.697
ATOM   4031  H2  HOH A 655      36.580  -1.452  12.173
ATOM   4032  O   HOH A 656      28.026  -2.114  25.354
ATOM   4033  H1  HOH A 656      27.205  -2.597  25.699
ATOM   4034  H2  HOH A 656      28.240  -2.818  24.641
ATOM   4035  O   HOH A 657      34.207   1.762  13.507
ATOM   4036  H1  HOH A 657      35.174   1.468  13.622
ATOM   4037  H2  HOH A 657      33.821   0.836  13.552
ATOM   4038  O   HOH A 658      30.204  -4.016  21.871
ATOM   4039  H1  HOH A 658      30.028  -4.800  21.304
ATOM   4040  H2  HOH A 658      30.062  -3.296  21.181
ATOM   4041  O   HOH A 659      32.924   1.385  10.021
ATOM   4042  H1  HOH A 659      33.828   0.988   9.838
ATOM   4043  H2  HOH A 659      32.598   1.366   9.065
ATOM   4044  O   HOH A 660      31.058  -7.097  24.806
ATOM   4045  H1  HOH A 660      31.263  -8.049  24.837
ATOM   4046  H2  HOH A 660      31.377  -6.918  23.856
ATOM   4047  O   HOH A 661      32.845  -7.617  20.378
ATOM   4048  H1  HOH A 661      32.849  -7.366  19.407
ATOM   4049  H2  HOH A 661      33.294  -8.473  20.322
ATOM   4050  O   HOH A 662      36.313   0.677  22.569
ATOM   4051  H1  HOH A 662      37.069   0.163  22.885
ATOM   4052  H2  HOH A 662      35.570   0.160  23.022
ATOM   4053  O   HOH A 663      33.240  -1.781   9.275
ATOM   4054  H1  HOH A 663      33.194  -2.773   9.054
ATOM   4055  H2  HOH A 663      33.171  -1.470   8.310
ATOM   4056  O   HOH A 664      32.169   7.486  23.740
ATOM   4057  H1  HOH A 664      31.173   7.394  23.560
ATOM   4058  H2  HOH A 664      32.446   7.560  22.778
ATOM   4059  O   HOH A 665      32.310  -3.338  25.573
ATOM   4060  H1  HOH A 665      31.931  -4.139  26.030
ATOM   4061  H2  HOH A 665      32.301  -3.710  24.636
ATOM   4062  O   HOH A 666      33.153  -4.184   8.573
ATOM   4063  H1  HOH A 666      32.366  -4.728   8.204
ATOM   4064  H2  HOH A 666      33.274  -4.771   9.395
ATOM   4065  O   HOH A 667      36.293   8.850  25.093
ATOM   4066  H1  HOH A 667      35.667   9.456  25.604
ATOM   4067  H2  HOH A 667      36.962   9.555  24.844
ATOM   4068  O   HOH A 668      35.851  -7.539   9.982
ATOM   4069  H1  HOH A 668      36.220  -8.427   9.850
ATOM   4070  H2  HOH A 668      34.990  -7.797  10.446
ATOM   4071  O   HOH A 669      37.859   5.100  14.135
ATOM   4072  H1  HOH A 669      37.992   5.994  13.653
ATOM   4073  H2  HOH A 669      38.414   4.558  13.492
ATOM   4074  O   HOH A 670      27.678   4.875  19.372
ATOM   4075  H1  HOH A 670      27.536   4.602  18.390
ATOM   4076  H2  HOH A 670      28.672   4.854  19.344
ATOM   4077  O   HOH A 671      34.069   3.848  14.956
ATOM   4078  H1  HOH A 671      34.108   3.030  14.363
ATOM   4079  H2  HOH A 671      33.056   3.844  15.062
ATOM   4080  O   HOH A 672      30.122   7.613  17.901
ATOM   4081  H1  HOH A 672      31.001   7.809  18.309
ATOM   4082  H2  HOH A 672      29.556   8.112  18.573
ATOM   4083  O   HOH A 673      28.719  -0.311  13.381
ATOM   4084  H1  HOH A 673      27.683  -0.312  13.331
ATOM   4085  H2  HOH A 673      28.766   0.706  13.430
ATOM   4086  O   HOH A 674      27.727   1.002  19.127
ATOM   4087  H1  HOH A 674      27.554   0.109  19.543
ATOM   4088  H2  HOH A 674      27.102   0.902  18.344
ATOM   4089  O   HOH A 675      26.746  -3.180  21.825
ATOM   4090  H1  HOH A 675      25.882  -3.158  22.352
ATOM   4091  H2  HOH A 675      27.342  -3.404  22.614
ATOM   4092  O   HOH A 676      28.905  -4.147  10.982
ATOM   4093  H1  HOH A 676      29.712  -4.748  11.069
ATOM   4094  H2  HOH A 676      29.343  -3.312  11.337
ATOM   4095  O   HOH A 677      27.781  -8.436   9.920
ATOM   4096  H1  HOH A 677      28.577  -8.293  10.538
ATOM   4097  H2  HOH A 677      28.360  -8.612   9.093
ATOM   4098  O   HOH A 678      26.457  -8.174  17.481
ATOM   4099  H1  HOH A 678      27.362  -8.614  17.666
ATOM   4100  H2  HOH A 678      26.733  -7.270  17.867
ATOM   4101  O   HOH A 679      24.556  -6.660  20.418
ATOM   4102  H1  HOH A 679      25.265  -7.348  20.624
ATOM   4103  H2  HOH A 679      23.988  -6.879  21.240
ATOM   4104  O   HOH A 680      30.995   1.464  24.860
ATOM   4105  H1  HOH A 680      30.690   2.308  25.324
ATOM   4106  H2  HOH A 680      31.091   0.910  25.707
ATOM   4107  O   HOH A 681      32.906   7.833  21.254
ATOM   4108  H1  HOH A 681      32.722   8.077  20.294
ATOM   4109  H2  HOH A 681      33.377   6.954  21.036
ATOM   4110  O   HOH A 682      27.173  -7.962  24.633
ATOM   4111  H1  HOH A 682      27.584  -8.901  24.541
ATOM   4112  H2  HOH A 682      26.329  -8.290  25.090
ATOM   4113  O   HOH A 683      30.302   4.866  22.175
ATOM   4114  H1  HOH A 683      29.621   4.128  22.366
ATOM   4115  H2  HOH A 683      30.314   4.704  21.168
ATOM   4116  O   HOH A 684      30.302   4.318  19.711
ATOM   4117  H1  HOH A 684      30.223   3.352  19.408
ATOM   4118  H2  HOH A 684      31.189   4.489  19.259
ATOM   4119  O   HOH A 685      34.488   9.463  17.430
ATOM   4120  H1  HOH A 685      34.936   8.592  17.107
ATOM   4121  H2  HOH A 685      34.315   9.795  16.476
ATOM   4122  O   HOH A 686      37.772  10.037  19.544
ATOM   4123  H1  HOH A 686      38.368   9.556  18.904
ATOM   4124  H2  HOH A 686      37.324   9.183  19.921
ATOM   4125  O   HOH A 687      28.984  -9.049  13.512
ATOM   4126  H1  HOH A 687      29.303  -8.663  12.623
ATOM   4127  H2  HOH A 687      28.334  -8.284  13.701
ATOM   4128  O   HOH A 688      34.096  -7.869  15.799
ATOM   4129  H1  HOH A 688      33.699  -7.857  14.886
ATOM   4130  H2  HOH A 688      34.263  -8.875  15.833
ATOM   4131  O   HOH A 689      28.567   6.028  12.860
ATOM   4132  H1  HOH A 689      28.377   6.033  11.877
ATOM   4133  H2  HOH A 689      29.547   6.285  12.771
ATOM   4134  O   HOH A 690      29.832  -8.136  11.324
ATOM   4135  H1  HOH A 690      30.610  -8.620  10.900
ATOM   4136  H2  HOH A 690      30.211  -7.208  11.232
ATOM   4137  O   HOH A 691      32.775  -7.874  13.551
ATOM   4138  H1  HOH A 691      32.100  -8.453  14.029
ATOM   4139  H2  HOH A 691      32.249  -7.012  13.626
ATOM   4140  O   HOH A 692      35.431   6.650  26.015
ATOM   4141  H1  HOH A 692      35.839   7.512  25.694
ATOM   4142  H2  HOH A 692      35.757   6.075  25.258
ATOM   4143  O   HOH A 693      30.947   6.748  12.506
ATOM   4144  H1  HOH A 693      31.641   6.187  12.025
ATOM   4145  H2  HOH A 693      31.428   6.785  13.389
ATOM   4146  O   HOH A 694      32.017   7.177  14.787
ATOM   4147  H1  HOH A 694      31.154   7.614  15.078
ATOM   4148  H2  HOH A 694      32.292   6.849  15.694
ATOM   4149  O   HOH A 695      36.253   0.253  -1.021
ATOM   4150  H1  HOH A 695      36.381   0.165  -0.013
ATOM   4151  H2  HOH A 695      36.854   1.083  -1.094
ATOM   4152  O   HOH A 696      37.823  -0.062   5.267
ATOM   4153  H1  HOH A 696      38.561   0.594   5.466
ATOM   4154  H2  HOH A 696      37.891  -0.568   6.143
ATOM   4155  O   HOH A 697      30.928   4.427  -0.960
ATOM   4156  H1  HOH A 697      30.570   3.515  -1.188
ATOM   4157  H2  HOH A 697      30.229   4.666  -0.286
ATOM   4158  O   HOH A 698      28.271   6.178   6.139
ATOM   4159  H1  HOH A 698      27.734   5.349   6.327
ATOM   4160  H2  HOH A 698      27.482   6.773   5.920
ATOM   4161  O   HOH A 699      29.027  -3.796  -2.998
ATOM   4162  H1  HOH A 699      29.650  -4.089  -3.746
ATOM   4163  H2  HOH A 699      29.649  -3.059  -2.666
ATOM   4164  O   HOH A 700      37.509   8.968  -0.685
ATOM   4165  H1  HOH A 700      37.495   9.906  -1.060
ATOM   4166  H2  HOH A 700      38.403   9.042  -0.228
ATOM   4167  O   HOH A 701      37.577   6.286   2.182
ATOM   4168  H1  HOH A 701      37.030   7.069   1.825
ATOM   4169  H2  HOH A 701      38.393   6.844   2.407
ATOM   4170  O   HOH A 702      25.417  -6.674   3.404
ATOM   4171  H1  HOH A 702      24.895  -6.314   4.227
ATOM   4172  H2  HOH A 702      25.337  -7.649   3.722
ATOM   4173  O   HOH A 703      37.049  -1.446   3.293
ATOM   4174  H1  HOH A 703      36.540  -2.160   3.782
ATOM   4175  H2  HOH A 703      37.413  -0.974   4.101
ATOM   4176  O   HOH A 704      30.827  -2.156  -2.399
ATOM   4177  H1  HOH A 704      30.853  -1.145  -2.294
ATOM   4178  H2  HOH A 704      31.349  -2.166  -3.273
ATOM   4179  O   HOH A 705      30.884  -0.292   1.078
ATOM   4180  H1  HOH A 705      30.660  -1.279   1.130
ATOM   4181  H2  HOH A 705      29.929   0.030   1.100
ATOM   4182  O   HOH A 706      34.252  -1.077   0.890
ATOM   4183  H1  HOH A 706      34.013  -1.454   1.803
ATOM   4184  H2  HOH A 706      35.092  -0.600   1.205
ATOM   4185  O   HOH A 707      30.899  -5.896   3.046
ATOM   4186  H1  HOH A 707      31.347  -5.001   2.905
ATOM   4187  H2  HOH A 707      31.364  -6.372   2.291
ATOM   4188  O   HOH A 708      36.993   4.038  -2.952
ATOM   4189  H1  HOH A 708      37.143   3.814  -3.950
ATOM   4190  H2  HOH A 708      37.419   4.955  -3.027
ATOM   4191  O   HOH A 709      32.270   1.915   4.038
ATOM   4192  H1  HOH A 709      32.294   2.881   4.332
ATOM   4193  H2  HOH A 709      31.632   1.990   3.314
ATOM   4194  O   HOH A 710      30.315  -2.745   1.157
ATOM   4195  H1  HOH A 710      30.907  -3.184   1.841
ATOM   4196  H2  HOH A 710      29.553  -3.403   1.211
ATOM   4197  O   HOH A 711      32.360   4.305   4.817
ATOM   4198  H1  HOH A 711      33.007   4.982   4.413
ATOM   4199  H2  HOH A 711      31.566   4.927   4.829
ATOM   4200  O   HOH A 712      29.741   6.278  -5.513
ATOM   4201  H1  HOH A 712      29.088   5.583  -5.854
ATOM   4202  H2  HOH A 712      29.362   6.258  -4.549
ATOM   4203  O   HOH A 713      34.706  -6.567   6.172
ATOM   4204  H1  HOH A 713      33.891  -7.096   5.912
ATOM   4205  H2  HOH A 713      34.913  -6.203   5.261
ATOM   4206  O   HOH A 714      39.501   7.782   2.866
ATOM   4207  H1  HOH A 714      40.089   7.208   3.472
ATOM   4208  H2  HOH A 714      39.165   8.373   3.630
ATOM   4209  O   HOH A 715      35.579   2.723   6.811
ATOM   4210  H1  HOH A 715      35.682   2.272   5.908
ATOM   4211  H2  HOH A 715      36.025   1.963   7.331
ATOM   4212  O   HOH A 716      37.498   2.404  -1.068
ATOM   4213  H1  HOH A 716      37.446   3.068  -0.330
ATOM   4214  H2  HOH A 716      37.368   3.044  -1.833
ATOM   4215  O   HOH A 717      34.296   1.411  -2.099
ATOM   4216  H1  HOH A 717      35.093   0.919  -1.695
ATOM   4217  H2  HOH A 717      33.639   1.101  -1.388
ATOM   4218  O   HOH A 718      37.110   4.142   0.866
ATOM   4219  H1  HOH A 718      37.408   4.966   1.373
ATOM   4220  H2  HOH A 718      36.352   4.604   0.376
ATOM   4221  O   HOH A 719      32.143  -3.770   2.608
ATOM   4222  H1  HOH A 719      32.712  -2.973   2.902
ATOM   4223  H2  HOH A 719      32.934  -4.332   2.318
ATOM   4224  O   HOH A 720      41.575  10.715   5.805
ATOM   4225  H1  HOH A 720      41.593   9.690   5.932
ATOM   4226  H2  HOH A 720      42.536  10.856   5.884
ATOM   4227  O   HOH A 721      33.210   3.541   7.100
ATOM   4228  H1  HOH A 721      32.956   3.826   6.172
ATOM   4229  H2  HOH A 721      34.157   3.257   6.894
ATOM   4230  O   HOH A 722      36.133   7.250  -1.928
ATOM   4231  H1  HOH A 722      36.902   6.881  -2.481
ATOM   4232  H2  HOH A 722      36.693   7.951  -1.452
ATOM   4233  O   HOH A 723      33.144   5.320   8.867
ATOM   4234  H1  HOH A 723      33.166   4.565   8.188
ATOM   4235  H2  HOH A 723      34.067   5.680   8.638
ATOM   4236  O   HOH A 724      29.697   2.289  -1.547
ATOM   4237  H1  HOH A 724      29.244   2.689  -2.335
ATOM   4238  H2  HOH A 724      28.975   2.481  -0.859
ATOM   4239  O   HOH A 725      36.728   6.669   6.292
ATOM   4240  H1  HOH A 725      36.500   6.163   5.445
ATOM   4241  H2  HOH A 725      36.512   7.590   5.909
ATOM   4242  O   HOH A 726      30.529   7.820  -1.067
ATOM   4243  H1  HOH A 726      29.635   7.361  -0.989
ATOM   4244  H2  HOH A 726      30.154   8.764  -1.121
ATOM   4245  O   HOH A 727      39.685   9.040   0.705
ATOM   4246  H1  HOH A 727      39.608   8.521   1.581
ATOM   4247  H2  HOH A 727      40.516   8.639   0.390
ATOM   4248  O   HOH A 728      32.192  -6.958   1.131
ATOM   4249  H1  HOH A 728      32.142  -7.960   1.021
ATOM   4250  H2  HOH A 728      31.793  -6.728   0.228
ATOM   4251  O   HOH A 729      37.896  -1.234   7.500
ATOM   4252  H1  HOH A 729      38.687  -1.432   8.101
ATOM   4253  H2  HOH A 729      37.431  -2.121   7.673
ATOM   4254  O   HOH A 730      36.745  -3.428   8.117
ATOM   4255  H1  HOH A 730      36.593  -4.456   8.086
ATOM   4256  H2  HOH A 730      35.893  -3.238   7.588
ATOM   4257  O   HOH A 731      33.983  -5.354   1.812
ATOM   4258  H1  HOH A 731      34.164  -5.025   0.870
ATOM   4259  H2  HOH A 731      33.322  -6.078   1.526
ATOM   4260  O   HOH A 732      31.101   0.328  -2.273
ATOM   4261  H1  HOH A 732      31.765   0.424  -1.509
ATOM   4262  H2  HOH A 732      30.519   1.113  -1.979
ATOM   4263  O   HOH A 733      31.244  -5.538   7.740
ATOM   4264  H1  HOH A 733      30.980  -5.736   6.777
ATOM   4265  H2  HOH A 733      30.286  -5.327   8.044
ATOM   4266  O   HOH A 734      33.313  -5.597  10.665
ATOM   4267  H1  HOH A 734      33.481  -6.590  10.776
ATOM   4268  H2  HOH A 734      33.906  -5.315  11.436
ATOM   4269  O   HOH A 735      28.443  -4.472   1.116
ATOM   4270  H1  HOH A 735      28.555  -5.045   0.306
ATOM   4271  H2  HOH A 735      28.283  -5.203   1.785
ATOM   4272  O   HOH A 736      25.771  -4.209  -8.079
ATOM   4273  H1  HOH A 736      25.131  -3.765  -7.420
ATOM   4274  H2  HOH A 736      25.292  -3.838  -8.905
ATOM   4275  O   HOH A 737      35.551  -3.145   4.463
ATOM   4276  H1  HOH A 737      35.232  -3.189   5.426
ATOM   4277  H2  HOH A 737      35.511  -4.140   4.296
ATOM   4278  O   HOH A 738      35.350  -5.624   3.879
ATOM   4279  H1  HOH A 738      34.786  -5.528   3.032
ATOM   4280  H2  HOH A 738      36.114  -6.074   3.478
ATOM   4281  O   HOH A 739      32.726   0.454  -0.355
ATOM   4282  H1  HOH A 739      33.380  -0.153   0.153
ATOM   4283  H2  HOH A 739      31.943   0.219   0.285
ATOM   4284  O   HOH A 740      34.446  -2.875  -3.579
ATOM   4285  H1  HOH A 740      34.683  -2.554  -2.641
ATOM   4286  H2  HOH A 740      35.012  -2.166  -4.048
ATOM   4287  O   HOH A 741      31.960   0.212  -4.624
ATOM   4288  H1  HOH A 741      32.021  -0.798  -4.676
ATOM   4289  H2  HOH A 741      31.621   0.244  -3.666
ATOM   4290  O   HOH A 742      37.121   2.281   2.622
ATOM   4291  H1  HOH A 742      37.687   2.799   3.280
ATOM   4292  H2  HOH A 742      37.121   2.990   1.902
ATOM   4293  O   HOH A 743      31.192  -6.086  -0.998
ATOM   4294  H1  HOH A 743      30.187  -5.946  -1.020
ATOM   4295  H2  HOH A 743      31.423  -5.105  -0.864
ATOM   4296  O   HOH A 744      33.736  -1.942   3.197
ATOM   4297  H1  HOH A 744      33.701  -1.130   3.814
ATOM   4298  H2  HOH A 744      34.482  -2.408   3.704
ATOM   4299  O   HOH A 745      32.396   5.202  -2.846
ATOM   4300  H1  HOH A 745      33.217   4.661  -2.610
ATOM   4301  H2  HOH A 745      31.832   4.873  -2.062
ATOM   4302  O   HOH A 746      35.048  -0.053   9.731
ATOM   4303  H1  HOH A 746      34.437  -0.839   9.573
ATOM   4304  H2  HOH A 746      35.393  -0.368  10.632
ATOM   4305  O   HOH A 747      35.287   5.431  -0.391
ATOM   4306  H1  HOH A 747      34.904   4.835  -1.114
ATOM   4307  H2  HOH A 747      35.599   6.163  -1.022
ATOM   4308  O   HOH A 748      37.767   7.684  -5.358
ATOM   4309  H1  HOH A 748      36.796   7.769  -5.623
ATOM   4310  H2  HOH A 748      38.147   8.328  -5.975
ATOM   4311  O   HOH A 749      32.180   1.258   7.575
ATOM   4312  H1  HOH A 749      32.510   2.180   7.342
ATOM   4313  H2  HOH A 749      31.311   1.302   7.089
ATOM   4314  O   HOH A 750      36.350   4.064   8.935
ATOM   4315  H1  HOH A 750      36.057   3.594   8.109
ATOM   4316  H2  HOH A 750      35.931   4.956   8.732
ATOM   4317  O   HOH A 751      39.538   1.743   5.862
ATOM   4318  H1  HOH A 751      39.363   1.872   6.855
ATOM   4319  H2  HOH A 751      40.509   1.688   5.899
ATOM   4320  O   HOH A 752      32.159   7.675  -2.974
ATOM   4321  H1  HOH A 752      31.505   7.736  -2.194
ATOM   4322  H2  HOH A 752      32.231   6.656  -2.935
ATOM   4323  O   HOH A 753      26.798  -1.218  -5.302
ATOM   4324  H1  HOH A 753      26.750  -2.123  -4.881
ATOM   4325  H2  HOH A 753      25.954  -0.845  -4.885
ATOM   4326  O   HOH A 754      34.521   3.920  -2.269
ATOM   4327  H1  HOH A 754      35.470   3.904  -2.613
ATOM   4328  H2  HOH A 754      34.421   2.914  -2.190
ATOM   4329  O   HOH A 755      36.340   5.375   4.158
ATOM   4330  H1  HOH A 755      36.895   4.554   4.261
ATOM   4331  H2  HOH A 755      36.841   5.743   3.349
ATOM   4332  O   HOH A 756      28.751  -5.576  -1.206
ATOM   4333  H1  HOH A 756      28.799  -4.786  -1.849
ATOM   4334  H2  HOH A 756      28.357  -6.209  -1.900
ATOM   4335  O   HOH A 757      38.285   3.539   4.500
ATOM   4336  H1  HOH A 757      38.768   2.805   4.999
ATOM   4337  H2  HOH A 757      38.625   4.294   5.089
ATOM   4338  O   HOH A 758      37.795   6.890  10.596
ATOM   4339  H1  HOH A 758      37.853   7.056  11.581
ATOM   4340  H2  HOH A 758      36.987   7.466  10.412
ATOM   4341  O   HOH A 759      31.564   9.437  -4.679
ATOM   4342  H1  HOH A 759      31.799   8.657  -4.064
ATOM   4343  H2  HOH A 759      31.455  10.099  -3.898
ATOM   4344  O   HOH A 760      28.062  -6.159   5.488
ATOM   4345  H1  HOH A 760      27.485  -5.928   6.281
ATOM   4346  H2  HOH A 760      28.029  -7.174   5.648
ATOM   4347  O   HOH A 761      35.384   6.311   8.368
ATOM   4348  H1  HOH A 761      35.940   6.495   7.536
ATOM   4349  H2  HOH A 761      35.607   7.162   8.843
ATOM   4350  O   HOH A 762      34.140   5.661  -6.261
ATOM   4351  H1  HOH A 762      34.533   4.738  -6.151
ATOM   4352  H2  HOH A 762      33.239   5.426  -5.842
ATOM   4353  O   HOH A 763      29.059   3.366  -3.851
ATOM   4354  H1  HOH A 763      28.581   3.806  -4.630
ATOM   4355  H2  HOH A 763      29.574   2.709  -4.436
ATOM   4356  O   HOH A 764      37.288   3.653  -5.365
ATOM   4357  H1  HOH A 764      36.352   3.468  -5.695
ATOM   4358  H2  HOH A 764      37.733   3.768  -6.215
ATOM   4359  O   HOH A 765      36.410   0.094   1.482
ATOM   4360  H1  HOH A 765      36.744  -0.550   2.210
ATOM   4361  H2  HOH A 765      36.738   0.930   1.935
ATOM   4362  O   HOH A 766      35.863   1.409   4.668
ATOM   4363  H1  HOH A 766      36.265   1.773   3.818
ATOM   4364  H2  HOH A 766      36.639   0.789   4.886
ATOM   4365  O   HOH A 767      34.134  10.757  -2.572
ATOM   4366  H1  HOH A 767      33.137  10.773  -2.650
ATOM   4367  H2  HOH A 767      34.283   9.874  -3.031
ATOM   4368  O   HOH A 768      33.869  -5.301  -3.035
ATOM   4369  H1  HOH A 768      34.095  -5.172  -2.077
ATOM   4370  H2  HOH A 768      34.157  -4.391  -3.357
ATOM   4371  O   HOH A 769      30.164   1.761  -5.468
ATOM   4372  H1  HOH A 769      30.852   1.077  -5.187
ATOM   4373  H2  HOH A 769      29.500   1.112  -5.857
ATOM   4374  O   HOH A 770      26.778  -3.561  -4.203
ATOM   4375  H1  HOH A 770      27.034  -4.414  -4.703
ATOM   4376  H2  HOH A 770      27.595  -3.574  -3.604
ATOM   4377  O   HOH A 771      32.112   9.209   2.764
ATOM   4378  H1  HOH A 771      32.010   8.386   2.175
ATOM   4379  H2  HOH A 771      31.155   9.194   3.096
ATOM   4380  O   HOH A 772      29.312   8.008   7.667
ATOM   4381  H1  HOH A 772      30.243   7.686   7.867
ATOM   4382  H2  HOH A 772      28.988   7.188   7.200
ATOM   4383  O   HOH A 773      33.040   5.943  -8.609
ATOM   4384  H1  HOH A 773      33.545   5.808  -7.755
ATOM   4385  H2  HOH A 773      32.887   6.942  -8.479
ATOM   4386  O   HOH A 774      39.602   4.489   8.301
ATOM   4387  H1  HOH A 774      39.147   4.566   9.210
ATOM   4388  H2  HOH A 774      39.453   3.479   8.241
ATOM   4389  O   HOH A 775      40.963   6.775   7.988
ATOM   4390  H1  HOH A 775      40.547   5.901   8.184
ATOM   4391  H2  HOH A 775      40.425   7.344   8.607
ATOM   4392  O   HOH A 776      34.922   3.197  -6.080
ATOM   4393  H1  HOH A 776      34.659   2.405  -5.499
ATOM   4394  H2  HOH A 776      34.482   2.849  -6.921
ATOM   4395  O   HOH A 777      33.255  -0.936   6.906
ATOM   4396  H1  HOH A 777      32.810  -0.061   7.192
ATOM   4397  H2  HOH A 777      33.462  -0.590   5.959
ATOM   4398  O   HOH A 778      35.025  -2.082  -1.255
ATOM   4399  H1  HOH A 778      34.638  -1.723  -0.375
ATOM   4400  H2  HOH A 778      35.663  -1.312  -1.374
ATOM   4401  O   HOH A 779      28.927  -5.083   8.488
ATOM   4402  H1  HOH A 779      28.728  -4.713   9.380
ATOM   4403  H2  HOH A 779      27.998  -5.288   8.188
ATOM   4404  O   HOH A 780      38.998   5.400   6.042
ATOM   4405  H1  HOH A 780      39.220   5.058   6.971
ATOM   4406  H2  HOH A 780      38.188   5.927   6.303
ATOM   4407  O   HOH A 781      32.613  -7.843   5.551
ATOM   4408  H1  HOH A 781      31.814  -7.245   5.416
ATOM   4409  H2  HOH A 781      32.454  -8.437   4.758
ATOM   4410  O   HOH A 782      34.623  -3.094   6.800
ATOM   4411  H1  HOH A 782      34.069  -2.252   6.805
ATOM   4412  H2  HOH A 782      34.021  -3.626   7.413
ATOM   4413  O   HOH A 783      33.747   0.051   4.691
ATOM   4414  H1  HOH A 783      34.587   0.622   4.674
ATOM   4415  H2  HOH A 783      33.122   0.821   4.409
ATOM   4416  O   HOH A 784      36.702   0.929   8.134
ATOM   4417  H1  HOH A 784      36.031   0.555   8.806
ATOM   4418  H2  HOH A 784      37.107   0.032   7.899
ATOM   4419  O   HOH A 785      39.015   2.023   8.299
ATOM   4420  H1  HOH A 785      38.059   1.687   8.306
ATOM   4421  H2  HOH A 785      39.318   1.412   9.070
ATOM   4422  O   HOH A 786      32.118  -2.301  -4.523
ATOM   4423  H1  HOH A 786      31.704  -3.182  -4.761
ATOM   4424  H2  HOH A 786      33.025  -2.640  -4.266
ATOM   4425  O   HOH A 787      32.443   7.318   5.757
ATOM   4426  H1  HOH A 787      31.628   6.866   5.360
ATOM   4427  H2  HOH A 787      33.103   6.940   5.107
ATOM   4428  O   HOH A 788      36.193  -5.822   8.020
ATOM   4429  H1  HOH A 788      36.014  -6.534   8.686
ATOM   4430  H2  HOH A 788      35.575  -6.174   7.290
ATOM   4431  O   HOH A 789      35.733  -0.970  -4.605
ATOM   4432  H1  HOH A 789      36.589  -0.714  -4.975
ATOM   4433  H2  HOH A 789      35.241  -0.108  -4.684
ATOM   4434  O   HOH A 790      35.663  10.578  11.106
ATOM   4435  H1  HOH A 790      34.850  11.089  11.410
ATOM   4436  H2  HOH A 790      36.107  11.358  10.628
ATOM   4437  O   HOH A 791      38.046   6.345  -3.293
ATOM   4438  H1  HOH A 791      39.016   6.410  -3.227
ATOM   4439  H2  HOH A 791      37.945   6.877  -4.169
ATOM   4440  O   HOH A 792      31.477   3.214  -7.031
ATOM   4441  H1  HOH A 792      31.652   3.950  -6.352
ATOM   4442  H2  HOH A 792      30.920   2.643  -6.396
ATOM   4443  O   HOH A 793      31.683   7.213   1.268
ATOM   4444  H1  HOH A 793      32.634   6.914   1.202
ATOM   4445  H2  HOH A 793      31.488   7.338   0.308
ATOM   4446  O   HOH A 794      29.587   6.495   2.443
ATOM   4447  H1  HOH A 794      29.294   5.813   1.745
ATOM   4448  H2  HOH A 794      30.433   6.767   1.943
ATOM   4449  O   HOH A 795      27.567  -5.667  -5.324
ATOM   4450  H1  HOH A 795      26.993  -6.072  -6.063
ATOM   4451  H2  HOH A 795      28.383  -5.534  -5.908
ATOM   4452  O   HOH A 796      30.740  -4.459  -4.784
ATOM   4453  H1  HOH A 796      31.096  -5.316  -4.408
ATOM   4454  H2  HOH A 796      30.345  -4.835  -5.625
ATOM   4455  O   HOH A 797      27.717 -12.969  -2.059
ATOM   4456  H1  HOH A 797      26.899 -12.424  -2.301
ATOM   4457  H2  HOH A 797      27.285 -13.650  -1.519
ATOM   4458  O   HOH A 798      27.822  -6.173   2.933
ATOM   4459  H1  HOH A 798      26.827  -6.333   3.088
ATOM   4460  H2  HOH A 798      28.039  -6.058   3.917
ATOM   4461  O   HOH A 799      26.607  -5.704   7.598
ATOM   4462  H1  HOH A 799      25.634  -5.396   7.417
ATOM   4463  H2  HOH A 799      26.299  -6.285   8.405
ATOM   4464  O   HOH A 800      33.926   6.064   3.960
ATOM   4465  H1  HOH A 800      34.009   6.325   2.988
ATOM   4466  H2  HOH A 800      34.887   5.750   4.059
ATOM   4467  O   HOH A 801      32.072  -9.429   3.579
ATOM   4468  H1  HOH A 801      31.056  -9.417   3.671
ATOM   4469  H2  HOH A 801      32.083  -9.424   2.577
ATOM   4470  O   HOH A 802      28.145  -8.596   5.858
ATOM   4471  H1  HOH A 802      27.507  -9.371   5.819
ATOM   4472  H2  HOH A 802      28.532  -8.808   6.770
ATOM   4473  O   HOH A 803      30.455   6.042   4.808
ATOM   4474  H1  HOH A 803      29.582   6.070   5.314
ATOM   4475  H2  HOH A 803      30.056   6.175   3.891
ATOM   4476  O   HOH A 804      34.192   6.683   1.476
ATOM   4477  H1  HOH A 804      34.576   6.095   0.734
ATOM   4478  H2  HOH A 804      34.947   7.365   1.431
ATOM   4479  O   HOH A 805      36.202   8.206   1.338
ATOM   4480  H1  HOH A 805      35.998   9.135   1.690
ATOM   4481  H2  HOH A 805      36.678   8.520   0.502
ATOM   4482  O   HOH A 806      28.295   6.553  -0.851
ATOM   4483  H1  HOH A 806      28.534   5.805  -0.184
ATOM   4484  H2  HOH A 806      27.324   6.576  -0.637
ATOM   4485  O   HOH A 807      30.020  -8.385  -2.911
ATOM   4486  H1  HOH A 807      30.653  -7.714  -3.284
ATOM   4487  H2  HOH A 807      29.174  -7.861  -3.050
ATOM   4488  O   HOH A 808      34.140  -4.414  -0.540
ATOM   4489  H1  HOH A 808      33.183  -4.070  -0.601
ATOM   4490  H2  HOH A 808      34.580  -3.548  -0.780
ATOM   4491  O   HOH A 809      28.869   5.962  -3.250
ATOM   4492  H1  HOH A 809      28.639   6.186  -2.303
ATOM   4493  H2  HOH A 809      28.962   4.987  -3.158
ATOM   4494  O   HOH A 810      31.687  -6.451  -3.433
ATOM   4495  H1  HOH A 810      31.512  -6.368  -2.431
ATOM   4496  H2  HOH A 810      32.636  -6.066  -3.366
ATOM   4497  O   HOH A 811      31.766  -3.658  -0.688
ATOM   4498  H1  HOH A 811      31.211  -3.235   0.050
ATOM   4499  H2  HOH A 811      31.406  -3.029  -1.418
ATOM   4500  O   HOH A 812      35.840   8.337   9.948
ATOM   4501  H1  HOH A 812      35.811   9.290  10.308
ATOM   4502  H2  HOH A 812      34.989   8.057  10.468
ATOM   4503  O   HOH A 813      31.683  -8.032   7.974
ATOM   4504  H1  HOH A 813      31.596  -7.024   7.973
ATOM   4505  H2  HOH A 813      32.162  -8.097   7.093
ATOM   4506  O   HOH A 814      35.304   7.906  -5.891
ATOM   4507  H1  HOH A 814      34.842   7.018  -6.022
ATOM   4508  H2  HOH A 814      34.940   8.084  -4.963
ATOM   4509  O   HOH A 815      31.922   5.009  -5.311
ATOM   4510  H1  HOH A 815      31.078   5.562  -5.351
ATOM   4511  H2  HOH A 815      32.036   5.056  -4.306
ATOM   4512  O   HOH A 816      31.958   0.592  -9.703
ATOM   4513  H1  HOH A 816      31.478   1.478  -9.683
ATOM   4514  H2  HOH A 816      32.767   0.864  -9.222
ATOM   4515  O   HOH A 817      34.284   1.213  -4.623
ATOM   4516  H1  HOH A 817      34.268   1.317  -3.614
ATOM   4517  H2  HOH A 817      33.341   0.844  -4.695
ATOM   4518  O   HOH A 818      28.914  -1.406  -8.345
ATOM   4519  H1  HOH A 818      29.694  -1.497  -8.984
ATOM   4520  H2  HOH A 818      28.671  -2.385  -8.335
ATOM   4521  O   HOH A 819      31.007   5.299  -9.943
ATOM   4522  H1  HOH A 819      31.144   5.910 -10.736
ATOM   4523  H2  HOH A 819      31.856   5.571  -9.452
ATOM   4524  O   HOH A 820      25.493   4.244 -12.858
ATOM   4525  H1  HOH A 820      26.020   5.099 -12.891
ATOM   4526  H2  HOH A 820      26.230   3.629 -12.601
ATOM   4527  O   HOH A 821      26.973   2.178 -12.242
ATOM   4528  H1  HOH A 821      27.191   1.263 -12.572
ATOM   4529  H2  HOH A 821      27.703   2.220 -11.538
ATOM   4530  O   HOH A 822      29.535  -5.292  -6.881
ATOM   4531  H1  HOH A 822      29.874  -5.945  -7.517
ATOM   4532  H2  HOH A 822      29.072  -4.673  -7.541
ATOM   4533  O   HOH A 823      28.639   2.104 -10.356
ATOM   4534  H1  HOH A 823      29.577   2.355 -10.036
ATOM   4535  H2  HOH A 823      28.187   2.856  -9.813
ATOM   4536  O   HOH A 824      27.195  -0.462 -12.367
ATOM   4537  H1  HOH A 824      27.168  -0.295 -11.366
ATOM   4538  H2  HOH A 824      27.934  -1.178 -12.290
ATOM   4539  O   HOH A 825      30.761  -1.562 -10.086
ATOM   4540  H1  HOH A 825      31.238  -0.659  -9.956
ATOM   4541  H2  HOH A 825      31.563  -2.096 -10.228
ATOM   4542  O   HOH A 826      27.839  -4.400 -10.984
ATOM   4543  H1  HOH A 826      26.902  -4.489 -11.354
ATOM   4544  H2  HOH A 826      28.224  -5.194 -11.400
ATOM   4545  O   HOH A 827      27.537   3.792  -8.966
ATOM   4546  H1  HOH A 827      26.586   4.149  -9.030
ATOM   4547  H2  HOH A 827      27.335   3.173  -8.178
ATOM   4548  O   HOH A 828      33.612   2.533  -8.158
ATOM   4549  H1  HOH A 828      33.614   3.207  -8.857
ATOM   4550  H2  HOH A 828      32.738   2.780  -7.709
ATOM   4551  O   HOH A 829      30.551   8.317  -6.676
ATOM   4552  H1  HOH A 829      30.894   8.788  -5.842
ATOM   4553  H2  HOH A 829      30.228   7.483  -6.175
ATOM   4554  O   HOH A 830      28.900  -2.173 -11.846
ATOM   4555  H1  HOH A 830      29.615  -1.989 -11.185
ATOM   4556  H2  HOH A 830      28.574  -3.040 -11.494
ATOM   4557  O   HOH A 831      28.367   0.258  -6.498
ATOM   4558  H1  HOH A 831      27.736  -0.372  -5.980
ATOM   4559  H2  HOH A 831      28.612  -0.432  -7.198
ATOM   4560  O   HOH A 832      28.227  -3.870  -8.523
ATOM   4561  H1  HOH A 832      27.241  -3.986  -8.287
ATOM   4562  H2  HOH A 832      28.099  -4.075  -9.511
ATOM   4563  O   HOH A 833      28.720   8.410  -8.344
ATOM   4564  H1  HOH A 833      28.734   7.386  -8.477
ATOM   4565  H2  HOH A 833      29.507   8.397  -7.689
ATOM   4566  O   HOH A 834      28.982   7.113 -13.111
ATOM   4567  H1  HOH A 834      29.284   7.985 -13.501
ATOM   4568  H2  HOH A 834      29.827   6.864 -12.654
ATOM   4569  O   HOH A 835      25.553  -0.956 -14.187
ATOM   4570  H1  HOH A 835      26.207  -1.016 -14.903
ATOM   4571  H2  HOH A 835      26.202  -0.775 -13.420
ATOM   4572  O   HOH A 836      27.402  -0.022  -9.860
ATOM   4573  H1  HOH A 836      28.018  -0.504  -9.230
ATOM   4574  H2  HOH A 836      27.969   0.807  -9.973
ATOM   4575  O   HOH A 837      30.810   2.863  -9.432
ATOM   4576  H1  HOH A 837      30.991   3.041  -8.447
ATOM   4577  H2  HOH A 837      30.887   3.845  -9.705
ATOM   4578  O   HOH A 838      28.878   5.973  -8.735
ATOM   4579  H1  HOH A 838      28.381   5.105  -8.803
ATOM   4580  H2  HOH A 838      29.710   5.674  -9.217
ATOM   4581  O   HOH A 839      31.323   6.877 -11.905
ATOM   4582  H1  HOH A 839      31.216   7.861 -11.726
ATOM   4583  H2  HOH A 839      32.168   6.897 -12.383
ATOM   4584  O   HOH A 840      32.558   8.363  -8.200
ATOM   4585  H1  HOH A 840      31.715   8.384  -7.645
ATOM   4586  H2  HOH A 840      32.298   9.107  -8.836
ATOM   4587  O   HOH A 841      25.254 -10.424  27.491
ATOM   4588  H1  HOH A 841      25.582  -9.902  28.304
ATOM   4589  H2  HOH A 841      24.424 -10.789  27.963
ATOM   4590  O   HOH A 842      28.885 -11.621  17.223
ATOM   4591  H1  HOH A 842      28.458 -12.290  17.854
ATOM   4592  H2  HOH A 842      29.789 -12.098  17.187
ATOM   4593  O   HOH A 843      27.632 -15.826   9.245
ATOM   4594  H1  HOH A 843      26.770 -15.280   9.236
ATOM   4595  H2  HOH A 843      27.974 -15.428  10.115
ATOM   4596  O   HOH A 844      25.957 -13.959  15.121
ATOM   4597  H1  HOH A 844      26.153 -14.358  14.208
ATOM   4598  H2  HOH A 844      26.689 -13.267  15.086
ATOM   4599  O   HOH A 845      31.305 -12.281  12.956
ATOM   4600  H1  HOH A 845      31.228 -13.001  12.261
ATOM   4601  H2  HOH A 845      30.352 -11.957  12.890
ATOM   4602  O   HOH A 846      26.286 -10.353  10.321
ATOM   4603  H1  HOH A 846      26.891  -9.543  10.169
ATOM   4604  H2  HOH A 846      25.712 -10.192   9.505
ATOM   4605  O   HOH A 847      28.091 -10.231  24.405
ATOM   4606  H1  HOH A 847      27.531 -10.913  24.856
ATOM   4607  H2  HOH A 847      28.212 -10.684  23.525
ATOM   4608  O   HOH A 848      31.500 -14.151   8.814
ATOM   4609  H1  HOH A 848      31.764 -13.488   8.113
ATOM   4610  H2  HOH A 848      30.695 -14.513   8.339
ATOM   4611  O   HOH A 849      24.695 -19.206  11.945
ATOM   4612  H1  HOH A 849      24.897 -18.987  10.986
ATOM   4613  H2  HOH A 849      24.818 -18.278  12.311
ATOM   4614  O   HOH A 850      32.137 -11.490  15.173
ATOM   4615  H1  HOH A 850      31.693 -10.581  15.051
ATOM   4616  H2  HOH A 850      31.863 -11.836  14.248
ATOM   4617  O   HOH A 851      28.620  -9.254  18.088
ATOM   4618  H1  HOH A 851      28.755 -10.189  17.722
ATOM   4619  H2  HOH A 851      29.484  -8.872  17.745
ATOM   4620  O   HOH A 852      26.443 -14.909  12.832
ATOM   4621  H1  HOH A 852      25.899 -14.279  12.247
ATOM   4622  H2  HOH A 852      27.288 -14.848  12.283
ATOM   4623  O   HOH A 853      31.638 -12.432   6.859
ATOM   4624  H1  HOH A 853      31.049 -12.904   6.192
ATOM   4625  H2  HOH A 853      32.214 -11.962   6.149
ATOM   4626  O   HOH A 854      27.143 -18.012   8.172
ATOM   4627  H1  HOH A 854      28.026 -18.418   8.185
ATOM   4628  H2  HOH A 854      27.385 -17.129   8.625
ATOM   4629  O   HOH A 855      27.036 -15.685  18.804
ATOM   4630  H1  HOH A 855      27.624 -16.400  18.504
ATOM   4631  H2  HOH A 855      26.399 -15.681  18.007
ATOM   4632  O   HOH A 856      30.987 -14.175  11.251
ATOM   4633  H1  HOH A 856      31.669 -14.830  11.490
ATOM   4634  H2  HOH A 856      31.214 -14.121  10.251
ATOM   4635  O   HOH A 857      25.069  -9.887  18.714
ATOM   4636  H1  HOH A 857      24.268  -9.731  18.128
ATOM   4637  H2  HOH A 857      25.664  -9.218  18.227
ATOM   4638  O   HOH A 858      28.445  -8.867  20.624
ATOM   4639  H1  HOH A 858      28.463  -9.025  19.636
ATOM   4640  H2  HOH A 858      27.448  -8.774  20.725
ATOM   4641  O   HOH A 859      29.657 -12.539  20.428
ATOM   4642  H1  HOH A 859      28.952 -12.860  19.787
ATOM   4643  H2  HOH A 859      30.451 -12.789  19.936
ATOM   4644  O   HOH A 860      31.086 -12.789  17.068
ATOM   4645  H1  HOH A 860      31.629 -13.589  17.063
ATOM   4646  H2  HOH A 860      31.553 -12.279  16.327
ATOM   4647  O   HOH A 861      27.686 -12.059  15.047
ATOM   4648  H1  HOH A 861      28.162 -11.844  15.913
ATOM   4649  H2  HOH A 861      27.044 -11.282  15.079
ATOM   4650  O   HOH A 862      27.959 -12.185  10.744
ATOM   4651  H1  HOH A 862      27.266 -11.455  10.639
ATOM   4652  H2  HOH A 862      28.340 -11.831  11.622
ATOM   4653  O   HOH A 863      31.718  -9.348  10.099
ATOM   4654  H1  HOH A 863      31.785  -8.825   9.224
ATOM   4655  H2  HOH A 863      31.329 -10.174   9.687
ATOM   4656  O   HOH A 864      28.449 -14.567  11.271
ATOM   4657  H1  HOH A 864      28.254 -13.589  11.054
ATOM   4658  H2  HOH A 864      29.451 -14.449  11.329
ATOM   4659  O   HOH A 865      26.564 -11.773   0.635
ATOM   4660  H1  HOH A 865      26.354 -10.956   1.217
ATOM   4661  H2  HOH A 865      27.283 -11.321   0.109
ATOM   4662  O   HOH A 866      28.719 -11.758   4.394
ATOM   4663  H1  HOH A 866      29.232 -12.532   4.795
ATOM   4664  H2  HOH A 866      28.303 -12.322   3.635
ATOM   4665  O   HOH A 867      29.954 -13.743   5.399
ATOM   4666  H1  HOH A 867      29.653 -14.226   6.238
ATOM   4667  H2  HOH A 867      30.034 -14.514   4.812
ATOM   4668  O   HOH A 868      30.429 -11.112   8.604
ATOM   4669  H1  HOH A 868      31.000 -11.602   7.914
ATOM   4670  H2  HOH A 868      29.637 -11.736   8.515
ATOM   4671  O   HOH A 869      21.274 -19.339   1.590
ATOM   4672  H1  HOH A 869      22.101 -19.744   1.283
ATOM   4673  H2  HOH A 869      21.524 -19.217   2.569
ATOM   4674  O   HOH A 870      25.680 -17.407   6.168
ATOM   4675  H1  HOH A 870      26.406 -17.390   5.455
ATOM   4676  H2  HOH A 870      26.280 -17.686   6.925
ATOM   4677  O   HOH A 871      26.210 -15.134   3.069
ATOM   4678  H1  HOH A 871      25.729 -15.050   3.968
ATOM   4679  H2  HOH A 871      25.336 -15.083   2.525
ATOM   4680  O   HOH A 872      27.331 -17.112   4.316
ATOM   4681  H1  HOH A 872      27.005 -16.365   3.737
ATOM   4682  H2  HOH A 872      27.852 -17.609   3.671
ATOM   4683  O   HOH A 873      29.946 -11.893  -2.327
ATOM   4684  H1  HOH A 873      30.314 -12.520  -2.967
ATOM   4685  H2  HOH A 873      29.029 -12.328  -2.212
ATOM   4686  O   HOH A 874      25.916 -12.317   7.876
ATOM   4687  H1  HOH A 874      25.605 -12.434   6.913
ATOM   4688  H2  HOH A 874      25.478 -11.410   8.002
ATOM   4689  O   HOH A 875      28.427  -8.459   1.905
ATOM   4690  H1  HOH A 875      28.988  -8.815   2.669
ATOM   4691  H2  HOH A 875      28.339  -7.523   2.259
ATOM   4692  O   HOH A 876      25.136 -10.991  -4.886
ATOM   4693  H1  HOH A 876      24.222 -11.141  -5.268
ATOM   4694  H2  HOH A 876      25.331 -10.129  -5.344
ATOM   4695  O   HOH A 877      29.309  -8.966   8.036
ATOM   4696  H1  HOH A 877      29.722  -9.877   8.264
ATOM   4697  H2  HOH A 877      30.203  -8.498   7.948
ATOM   4698  O   HOH A 878      25.050 -18.642   9.486
ATOM   4699  H1  HOH A 878      25.882 -18.420   8.964
ATOM   4700  H2  HOH A 878      24.599 -17.741   9.356
ATOM   4701  O   HOH A 879      29.596  -9.445   3.913
ATOM   4702  H1  HOH A 879      29.093  -9.044   4.690
ATOM   4703  H2  HOH A 879      29.292 -10.403   4.087
ATOM   4704  O   HOH A 880      30.595  -6.288   5.443
ATOM   4705  H1  HOH A 880      30.687  -6.109   4.433
ATOM   4706  H2  HOH A 880      29.589  -6.197   5.452
ATOM   4707  O   HOH A 881      26.198  -9.675   1.941
ATOM   4708  H1  HOH A 881      27.068  -9.183   2.044
ATOM   4709  H2  HOH A 881      25.814  -9.446   2.844
ATOM   4710  O   HOH A 882      25.147  -9.020   4.120
ATOM   4711  H1  HOH A 882      24.263  -9.248   4.535
ATOM   4712  H2  HOH A 882      25.711  -9.634   4.695
ATOM   4713  O   HOH A 883      29.279 -14.731   7.621
ATOM   4714  H1  HOH A 883      28.641 -15.279   8.178
ATOM   4715  H2  HOH A 883      28.875 -13.826   7.899
ATOM   4716  O   HOH A 884      26.687 -10.595   5.336
ATOM   4717  H1  HOH A 884      26.089 -11.422   5.399
ATOM   4718  H2  HOH A 884      27.495 -11.104   4.989
ATOM   4719  O   HOH A 885      27.616 -13.074   2.634
ATOM   4720  H1  HOH A 885      27.082 -13.918   2.746
ATOM   4721  H2  HOH A 885      27.165 -12.731   1.818
ATOM   4722  O   HOH A 886      28.203  -9.834  -0.250
ATOM   4723  H1  HOH A 886      28.349  -9.250   0.561
ATOM   4724  H2  HOH A 886      29.167  -9.866  -0.536
ATOM   4725  O   HOH A 887      24.842  -8.360   0.348
ATOM   4726  H1  HOH A 887      25.410  -8.935   0.977
ATOM   4727  H2  HOH A 887      25.284  -8.716  -0.498
ATOM   4728  O   HOH A 888      30.631  -9.902  -1.053
ATOM   4729  H1  HOH A 888      30.411 -10.751  -1.599
ATOM   4730  H2  HOH A 888      30.426  -9.272  -1.842
ATOM   4731  O   HOH A 889      32.947 -11.315   5.082
ATOM   4732  H1  HOH A 889      32.601 -10.586   4.487
ATOM   4733  H2  HOH A 889      33.877 -11.320   4.813
ATOM   4734  O   HOH A 890      13.722  29.401  31.803
ATOM   4735  H1  HOH A 890      13.092  28.948  31.150
ATOM   4736  H2  HOH A 890      13.130  29.468  32.563
ATOM   4737  O   HOH A 891      15.909  29.450  30.642
ATOM   4738  H1  HOH A 891      15.812  30.420  30.332
ATOM   4739  H2  HOH A 891      15.027  29.457  31.170
ATOM   4740  O   HOH A 892      19.521  22.995  35.333
ATOM   4741  H1  HOH A 892      19.686  23.221  36.267
ATOM   4742  H2  HOH A 892      19.909  23.854  34.926
ATOM   4743  O   HOH A 893      20.194  30.576  29.350
ATOM   4744  H1  HOH A 893      20.653  29.664  29.528
ATOM   4745  H2  HOH A 893      20.174  30.876  30.276
ATOM   4746  O   HOH A 894      27.467  24.526  28.652
ATOM   4747  H1  HOH A 894      27.756  25.489  28.558
ATOM   4748  H2  HOH A 894      28.298  24.128  28.218
ATOM   4749  O   HOH A 895      19.025  25.975  32.394
ATOM   4750  H1  HOH A 895      18.429  26.768  32.186
ATOM   4751  H2  HOH A 895      18.339  25.263  32.203
ATOM   4752  O   HOH A 896       7.495  27.834  29.528
ATOM   4753  H1  HOH A 896       7.341  28.652  28.964
ATOM   4754  H2  HOH A 896       8.108  28.274  30.196
ATOM   4755  O   HOH A 897      15.562  31.770  29.746
ATOM   4756  H1  HOH A 897      15.085  32.610  29.783
ATOM   4757  H2  HOH A 897      15.841  31.776  28.783
ATOM   4758  O   HOH A 898      24.123  32.338  26.921
ATOM   4759  H1  HOH A 898      24.544  32.884  27.594
ATOM   4760  H2  HOH A 898      23.214  32.233  27.300
ATOM   4761  O   HOH A 899      13.666  22.764  32.835
ATOM   4762  H1  HOH A 899      13.114  22.091  33.377
ATOM   4763  H2  HOH A 899      12.905  22.905  32.150
ATOM   4764  O   HOH A 900      20.613  26.079  30.458
ATOM   4765  H1  HOH A 900      21.434  25.683  30.899
ATOM   4766  H2  HOH A 900      20.031  26.061  31.289
ATOM   4767  O   HOH A 901       9.754  32.831  28.654
ATOM   4768  H1  HOH A 901       9.605  33.709  29.036
ATOM   4769  H2  HOH A 901      10.487  33.070  28.000
ATOM   4770  O   HOH A 902      14.890  23.817  34.846
ATOM   4771  H1  HOH A 902      14.423  23.501  34.018
ATOM   4772  H2  HOH A 902      15.816  23.515  34.585
ATOM   4773  O   HOH A 903      15.455  27.962  28.667
ATOM   4774  H1  HOH A 903      16.422  27.659  28.584
ATOM   4775  H2  HOH A 903      15.627  28.555  29.480
ATOM   4776  O   HOH A 904      11.588  33.359  26.999
ATOM   4777  H1  HOH A 904      12.124  32.513  26.990
ATOM   4778  H2  HOH A 904      12.321  33.953  26.606
ATOM   4779  O   HOH A 905      16.312  31.480  27.330
ATOM   4780  H1  HOH A 905      15.694  30.712  27.070
ATOM   4781  H2  HOH A 905      17.108  30.884  27.541
ATOM   4782  O   HOH A 906      19.894  24.495  28.642
ATOM   4783  H1  HOH A 906      19.611  23.742  29.218
ATOM   4784  H2  HOH A 906      20.154  25.131  29.392
ATOM   4785  O   HOH A 907      14.813  29.554  26.794
ATOM   4786  H1  HOH A 907      14.642  28.876  26.057
ATOM   4787  H2  HOH A 907      15.040  28.872  27.505
ATOM   4788  O   HOH A 908      17.908  27.396  28.482
ATOM   4789  H1  HOH A 908      18.023  26.681  27.788
ATOM   4790  H2  HOH A 908      18.506  27.042  29.166
ATOM   4791  O   HOH A 909      23.332  25.296  28.931
ATOM   4792  H1  HOH A 909      23.793  24.401  28.844
ATOM   4793  H2  HOH A 909      23.100  25.185  29.916
ATOM   4794  O   HOH A 910      11.452  29.128  28.012
ATOM   4795  H1  HOH A 910      11.772  28.837  28.929
ATOM   4796  H2  HOH A 910      10.627  29.618  28.358
ATOM   4797  O   HOH A 911      12.715  30.997  26.857
ATOM   4798  H1  HOH A 911      13.599  30.500  26.844
ATOM   4799  H2  HOH A 911      12.204  30.250  27.325
ATOM   4800  O   HOH A 912      11.716  26.744  26.961
ATOM   4801  H1  HOH A 912      12.474  26.578  27.602
ATOM   4802  H2  HOH A 912      11.544  27.695  27.237
ATOM   4803  O   HOH A 913      11.558  25.014  29.982
ATOM   4804  H1  HOH A 913      12.246  25.551  29.531
ATOM   4805  H2  HOH A 913      11.033  25.749  30.414
ATOM   4806  O   HOH A 914      21.268  28.419  29.739
ATOM   4807  H1  HOH A 914      21.004  27.491  30.021
ATOM   4808  H2  HOH A 914      22.177  28.183  29.382
ATOM   4809  O   HOH A 915      13.477  26.413  28.847
ATOM   4810  H1  HOH A 915      14.091  25.584  28.998
ATOM   4811  H2  HOH A 915      14.283  27.039  28.730
ATOM   4812  O   HOH A 916      17.707  28.073  31.860
ATOM   4813  H1  HOH A 916      17.848  28.750  32.542
ATOM   4814  H2  HOH A 916      17.004  28.554  31.318
ATOM   4815  O   HOH A 917      21.046  32.049  19.547
ATOM   4816  H1  HOH A 917      21.362  31.108  19.345
ATOM   4817  H2  HOH A 917      21.229  32.400  18.602
ATOM   4818  O   HOH A 918      17.671  34.742  20.081
ATOM   4819  H1  HOH A 918      18.592  35.162  20.012
ATOM   4820  H2  HOH A 918      18.020  33.784  20.122
ATOM   4821  O   HOH A 919      12.403  32.041  18.733
ATOM   4822  H1  HOH A 919      11.564  32.310  18.239
ATOM   4823  H2  HOH A 919      11.954  31.838  19.613
ATOM   4824  O   HOH A 920      10.878  31.205  13.017
ATOM   4825  H1  HOH A 920       9.879  31.108  12.857
ATOM   4826  H2  HOH A 920      11.128  30.339  12.549
ATOM   4827  O   HOH A 921      10.472  28.166  20.621
ATOM   4828  H1  HOH A 921      10.245  27.933  21.568
ATOM   4829  H2  HOH A 921       9.932  29.015  20.581
ATOM   4830  O   HOH A 922      14.477  26.752  21.159
ATOM   4831  H1  HOH A 922      14.474  27.116  20.199
ATOM   4832  H2  HOH A 922      13.756  26.033  20.933
ATOM   4833  O   HOH A 923      21.765  29.777  18.663
ATOM   4834  H1  HOH A 923      21.597  28.771  18.680
ATOM   4835  H2  HOH A 923      21.048  29.943  17.940
ATOM   4836  O   HOH A 924      14.009  29.385  15.751
ATOM   4837  H1  HOH A 924      13.887  29.655  16.736
ATOM   4838  H2  HOH A 924      13.281  30.056  15.431
ATOM   4839  O   HOH A 925      23.971  28.067  15.965
ATOM   4840  H1  HOH A 925      24.575  27.492  16.570
ATOM   4841  H2  HOH A 925      24.341  28.947  16.326
ATOM   4842  O   HOH A 926      13.079  29.369  21.714
ATOM   4843  H1  HOH A 926      14.038  29.702  21.723
ATOM   4844  H2  HOH A 926      13.245  28.487  21.324
ATOM   4845  O   HOH A 927      16.489  31.144  19.804
ATOM   4846  H1  HOH A 927      17.305  31.728  19.991
ATOM   4847  H2  HOH A 927      17.012  30.459  19.259
ATOM   4848  O   HOH A 928      26.235  27.993  22.709
ATOM   4849  H1  HOH A 928      25.927  28.847  22.276
ATOM   4850  H2  HOH A 928      26.132  28.302  23.666
ATOM   4851  O   HOH A 929      18.990  26.204  18.627
ATOM   4852  H1  HOH A 929      18.742  25.262  18.906
ATOM   4853  H2  HOH A 929      18.436  26.179  17.767
ATOM   4854  O   HOH A 930      20.650  35.294  17.407
ATOM   4855  H1  HOH A 930      19.788  35.690  16.988
ATOM   4856  H2  HOH A 930      20.371  35.481  18.353
ATOM   4857  O   HOH A 931      12.094  34.792  21.620
ATOM   4858  H1  HOH A 931      12.371  33.916  22.066
ATOM   4859  H2  HOH A 931      12.941  34.886  21.072
ATOM   4860  O   HOH A 932      24.181  29.589  19.289
ATOM   4861  H1  HOH A 932      23.206  29.747  19.042
ATOM   4862  H2  HOH A 932      24.547  29.830  18.374
ATOM   4863  O   HOH A 933      15.804  27.925  22.913
ATOM   4864  H1  HOH A 933      15.716  28.847  22.491
ATOM   4865  H2  HOH A 933      15.255  27.448  22.198
ATOM   4866  O   HOH A 934      10.582  38.411  14.246
ATOM   4867  H1  HOH A 934      11.109  38.422  13.401
ATOM   4868  H2  HOH A 934       9.702  38.700  13.849
ATOM   4869  O   HOH A 935      28.720  28.625  19.721
ATOM   4870  H1  HOH A 935      28.684  28.141  20.609
ATOM   4871  H2  HOH A 935      28.338  29.506  20.089
ATOM   4872  O   HOH A 936      17.498  26.028  16.638
ATOM   4873  H1  HOH A 936      17.522  25.307  15.934
ATOM   4874  H2  HOH A 936      16.542  25.854  16.937
ATOM   4875  O   HOH A 937      21.407  32.915  17.237
ATOM   4876  H1  HOH A 937      20.710  32.622  16.553
ATOM   4877  H2  HOH A 937      21.096  33.882  17.275
ATOM   4878  O   HOH A 938      16.961  31.013  11.429
ATOM   4879  H1  HOH A 938      17.443  31.769  11.899
ATOM   4880  H2  HOH A 938      16.108  31.535  11.249
ATOM   4881  O   HOH A 939      22.592  35.709  15.877
ATOM   4882  H1  HOH A 939      21.807  35.557  16.508
ATOM   4883  H2  HOH A 939      22.469  36.666  15.741
ATOM   4884  O   HOH A 940      23.463  30.725  22.914
ATOM   4885  H1  HOH A 940      22.872  31.532  23.012
ATOM   4886  H2  HOH A 940      23.765  30.682  23.879
ATOM   4887  O   HOH A 941      14.781  32.903  18.890
ATOM   4888  H1  HOH A 941      13.869  32.486  18.854
ATOM   4889  H2  HOH A 941      15.286  32.123  19.245
ATOM   4890  O   HOH A 942      16.007  34.562  22.054
ATOM   4891  H1  HOH A 942      15.249  34.774  21.399
ATOM   4892  H2  HOH A 942      16.741  34.695  21.374
ATOM   4893  O   HOH A 943      15.448  30.165  21.858
ATOM   4894  H1  HOH A 943      15.874  30.565  21.022
ATOM   4895  H2  HOH A 943      15.414  31.048  22.367
ATOM   4896  O   HOH A 944      20.521  32.513  13.244
ATOM   4897  H1  HOH A 944      21.006  31.918  12.584
ATOM   4898  H2  HOH A 944      21.271  33.170  13.377
ATOM   4899  O   HOH A 945      15.349  35.083  24.499
ATOM   4900  H1  HOH A 945      15.657  35.010  23.551
ATOM   4901  H2  HOH A 945      15.863  34.295  24.857
ATOM   4902  O   HOH A 946      24.124  24.203  10.421
ATOM   4903  H1  HOH A 946      24.066  24.559  11.376
ATOM   4904  H2  HOH A 946      24.449  25.092  10.029
ATOM   4905  O   HOH A 947      12.345  31.051  15.116
ATOM   4906  H1  HOH A 947      12.677  31.987  15.208
ATOM   4907  H2  HOH A 947      11.720  31.188  14.353
ATOM   4908  O   HOH A 948       9.570  34.574  21.549
ATOM   4909  H1  HOH A 948      10.570  34.671  21.492
ATOM   4910  H2  HOH A 948       9.410  34.444  20.561
ATOM   4911  O   HOH A 949       9.283  36.605  17.827
ATOM   4912  H1  HOH A 949       8.318  36.902  17.737
ATOM   4913  H2  HOH A 949       9.607  37.339  18.376
ATOM   4914  O   HOH A 950      26.019  28.708  25.138
ATOM   4915  H1  HOH A 950      25.320  29.439  25.190
ATOM   4916  H2  HOH A 950      25.855  28.343  26.064
ATOM   4917  O   HOH A 951       8.163  35.167  23.474
ATOM   4918  H1  HOH A 951       8.783  34.929  22.691
ATOM   4919  H2  HOH A 951       8.780  34.860  24.193
ATOM   4920  O   HOH A 952      15.129  25.777  17.375
ATOM   4921  H1  HOH A 952      14.632  26.199  16.588
ATOM   4922  H2  HOH A 952      14.805  26.474  18.049
ATOM   4923  O   HOH A 953      19.750  29.383  23.223
ATOM   4924  H1  HOH A 953      19.581  29.441  24.230
ATOM   4925  H2  HOH A 953      19.139  28.586  23.082
ATOM   4926  O   HOH A 954      24.167  30.431  25.324
ATOM   4927  H1  HOH A 954      23.498  29.973  25.947
ATOM   4928  H2  HOH A 954      24.257  31.261  25.918
ATOM   4929  O   HOH A 955      21.657  31.645  27.524
ATOM   4930  H1  HOH A 955      22.002  30.713  27.291
ATOM   4931  H2  HOH A 955      21.052  31.331  28.269
ATOM   4932  O   HOH A 956      17.339  26.455  11.661
ATOM   4933  H1  HOH A 956      16.525  25.880  11.901
ATOM   4934  H2  HOH A 956      17.850  25.668  11.240
ATOM   4935  O   HOH A 957      14.242  27.599  18.849
ATOM   4936  H1  HOH A 957      13.233  27.656  18.729
ATOM   4937  H2  HOH A 957      14.411  28.556  18.591
ATOM   4938  O   HOH A 958      13.599  29.973  18.104
ATOM   4939  H1  HOH A 958      12.784  29.383  18.288
ATOM   4940  H2  HOH A 958      13.117  30.844  18.322
ATOM   4941  O   HOH A 959      19.754  32.065  15.575
ATOM   4942  H1  HOH A 959      18.770  32.209  15.362
ATOM   4943  H2  HOH A 959      20.076  32.212  14.620
ATOM   4944  O   HOH A 960      16.430  32.913  25.243
ATOM   4945  H1  HOH A 960      16.306  32.435  26.131
ATOM   4946  H2  HOH A 960      17.373  32.542  25.088
ATOM   4947  O   HOH A 961      19.965  30.060  17.015
ATOM   4948  H1  HOH A 961      19.892  30.871  16.402
ATOM   4949  H2  HOH A 961      19.920  29.377  16.266
ATOM   4950  O   HOH A 962      12.080  28.942  23.987
ATOM   4951  H1  HOH A 962      12.877  28.495  24.401
ATOM   4952  H2  HOH A 962      12.494  29.090  23.075
ATOM   4953  O   HOH A 963      18.207  29.887  27.900
ATOM   4954  H1  HOH A 963      18.943  30.165  28.530
ATOM   4955  H2  HOH A 963      18.103  28.948  28.235
ATOM   4956  O   HOH A 964       8.615  25.892  17.972
ATOM   4957  H1  HOH A 964       7.868  25.746  18.645
ATOM   4958  H2  HOH A 964       9.204  25.140  18.328
ATOM   4959  O   HOH A 965       7.204  32.066  10.737
ATOM   4960  H1  HOH A 965       7.853  31.621  11.347
ATOM   4961  H2  HOH A 965       7.708  32.022   9.890
ATOM   4962  O   HOH A 966      21.750  32.634  23.115
ATOM   4963  H1  HOH A 966      21.486  32.814  24.067
ATOM   4964  H2  HOH A 966      20.850  32.296  22.810
ATOM   4965  O   HOH A 967      17.972  29.538  18.527
ATOM   4966  H1  HOH A 967      18.821  29.852  18.064
ATOM   4967  H2  HOH A 967      17.589  29.103  17.691
ATOM   4968  O   HOH A 968      11.802  28.314  18.549
ATOM   4969  H1  HOH A 968      11.261  28.205  19.420
ATOM   4970  H2  HOH A 968      10.998  28.181  17.944
ATOM   4971  O   HOH A 969      17.335  32.308  14.949
ATOM   4972  H1  HOH A 969      16.841  31.424  14.882
ATOM   4973  H2  HOH A 969      16.693  32.727  15.615
ATOM   4974  O   HOH A 970      21.244  27.315  18.590
ATOM   4975  H1  HOH A 970      21.412  27.076  19.557
ATOM   4976  H2  HOH A 970      20.332  26.850  18.553
ATOM   4977  O   HOH A 971      14.275  33.523  12.910
ATOM   4978  H1  HOH A 971      14.564  32.903  12.154
ATOM   4979  H2  HOH A 971      13.284  33.505  12.621
ATOM   4980  O   HOH A 972      25.712  27.690  27.496
ATOM   4981  H1  HOH A 972      25.663  26.700  27.177
ATOM   4982  H2  HOH A 972      26.587  27.564  27.972
ATOM   4983  O   HOH A 973      18.615  32.416  20.286
ATOM   4984  H1  HOH A 973      18.909  32.146  21.238
ATOM   4985  H2  HOH A 973      19.540  32.266  19.893
ATOM   4986  O   HOH A 974       9.788  27.932  17.080
ATOM   4987  H1  HOH A 974       9.260  27.157  17.478
ATOM   4988  H2  HOH A 974       9.859  27.521  16.152
ATOM   4989  O   HOH A 975      12.711  32.693  22.810
ATOM   4990  H1  HOH A 975      12.322  32.226  23.612
ATOM   4991  H2  HOH A 975      13.676  32.516  23.013
ATOM   4992  O   HOH A 976      12.766  35.347  16.688
ATOM   4993  H1  HOH A 976      11.950  35.671  16.207
ATOM   4994  H2  HOH A 976      12.956  34.550  16.118
ATOM   4995  O   HOH A 977      18.763  26.473  13.756
ATOM   4996  H1  HOH A 977      18.143  26.585  12.964
ATOM   4997  H2  HOH A 977      18.328  25.673  14.146
ATOM   4998  O   HOH A 978      24.090  32.439  13.780
ATOM   4999  H1  HOH A 978      23.952  32.266  14.766
ATOM   5000  H2  HOH A 978      23.412  33.209  13.743
ATOM   5001  O   HOH A 979      14.255  34.910  20.311
ATOM   5002  H1  HOH A 979      14.244  35.579  19.541
ATOM   5003  H2  HOH A 979      14.473  34.110  19.720
ATOM   5004  O   HOH A 980      18.585  36.204  16.480
ATOM   5005  H1  HOH A 980      18.107  36.537  15.644
ATOM   5006  H2  HOH A 980      17.749  35.920  16.968
ATOM   5007  O   HOH A 981       9.947  34.320  25.183
ATOM   5008  H1  HOH A 981      10.524  34.039  25.952
ATOM   5009  H2  HOH A 981      10.640  34.892  24.722
ATOM   5010  O   HOH A 982      20.867  32.969  25.560
ATOM   5011  H1  HOH A 982      20.964  33.855  25.954
ATOM   5012  H2  HOH A 982      21.203  32.427  26.358
ATOM   5013  O   HOH A 983      23.549  32.600  11.137
ATOM   5014  H1  HOH A 983      22.776  31.969  11.314
ATOM   5015  H2  HOH A 983      23.910  32.614  12.055
ATOM   5016  O   HOH A 984      20.070  35.601  19.931
ATOM   5017  H1  HOH A 984      20.769  35.008  20.353
ATOM   5018  H2  HOH A 984      20.282  36.431  20.393
ATOM   5019  O   HOH A 985      16.601  35.408  17.825
ATOM   5020  H1  HOH A 985      16.920  35.190  18.750
ATOM   5021  H2  HOH A 985      15.744  35.859  18.081
ATOM   5022  O   HOH A 986       8.428  30.814  12.642
ATOM   5023  H1  HOH A 986       8.125  30.993  13.600
ATOM   5024  H2  HOH A 986       8.424  29.801  12.744
ATOM   5025  O   HOH A 987      15.746  33.352  16.614
ATOM   5026  H1  HOH A 987      16.156  34.219  16.959
ATOM   5027  H2  HOH A 987      15.346  33.101  17.522
ATOM   5028  O   HOH A 988      12.716  23.568  14.420
ATOM   5029  H1  HOH A 988      12.319  22.729  14.829
ATOM   5030  H2  HOH A 988      12.460  24.181  15.187
ATOM   5031  O   HOH A 989      11.579  25.734  24.582
ATOM   5032  H1  HOH A 989      11.558  26.208  25.467
ATOM   5033  H2  HOH A 989      12.578  25.601  24.556
ATOM   5034  O   HOH A 990      21.636  30.995  11.562
ATOM   5035  H1  HOH A 990      21.840  30.047  11.864
ATOM   5036  H2  HOH A 990      21.139  30.721  10.720
ATOM   5037  O   HOH A 991      10.667  36.279  15.579
ATOM   5038  H1  HOH A 991      10.618  37.188  15.132
ATOM   5039  H2  HOH A 991      10.076  36.482  16.352
ATOM   5040  O   HOH A 992      22.084  28.645  22.572
ATOM   5041  H1  HOH A 992      22.661  29.470  22.665
ATOM   5042  H2  HOH A 992      21.215  29.087  22.834
ATOM   5043  O   HOH A 993      24.076  27.518  13.529
ATOM   5044  H1  HOH A 993      23.319  28.059  13.175
ATOM   5045  H2  HOH A 993      23.975  27.765  14.504
ATOM   5046  O   HOH A 994      16.197  30.048  14.805
ATOM   5047  H1  HOH A 994      15.281  29.818  15.205
ATOM   5048  H2  HOH A 994      16.705  29.415  15.432
ATOM   5049  O   HOH A 995      19.432  31.733  22.514
ATOM   5050  H1  HOH A 995      18.988  31.892  23.415
ATOM   5051  H2  HOH A 995      19.565  30.727  22.679
ATOM   5052  O   HOH A 996      19.728  28.229  15.307
ATOM   5053  H1  HOH A 996      19.396  27.548  14.632
ATOM   5054  H2  HOH A 996      20.564  27.709  15.562
ATOM   5055  O   HOH A 997      15.676  29.139  12.507
ATOM   5056  H1  HOH A 997      16.295  29.799  12.036
ATOM   5057  H2  HOH A 997      15.890  29.497  13.439
ATOM   5058  O   HOH A 998      24.927  26.013  21.831
ATOM   5059  H1  HOH A 998      25.421  26.837  22.160
ATOM   5060  H2  HOH A 998      24.628  26.446  20.944
ATOM   5061  O   HOH A 999      23.676  32.222  16.322
ATOM   5062  H1  HOH A 999      22.746  32.415  16.684
ATOM   5063  H2  HOH A 999      24.072  33.104  16.646
ATOM   5064  O   HOH A1000      13.994  36.923  11.864
ATOM   5065  H1  HOH A1000      14.604  36.484  12.542
ATOM   5066  H2  HOH A1000      14.175  36.246  11.130
ATOM   5067  O   HOH A1001      11.906  33.299  12.264
ATOM   5068  H1  HOH A1001      11.496  32.408  12.582
ATOM   5069  H2  HOH A1001      11.309  33.863  12.869
ATOM   5070  O   HOH A1002       6.935  38.244  15.204
ATOM   5071  H1  HOH A1002       7.504  38.620  14.474
ATOM   5072  H2  HOH A1002       6.193  37.901  14.603
ATOM   5073  O   HOH A1003      11.671  35.747  23.957
ATOM   5074  H1  HOH A1003      11.508  36.684  23.751
ATOM   5075  H2  HOH A1003      11.849  35.417  23.019
ATOM   5076  O   HOH A1004      15.673  35.572  13.191
ATOM   5077  H1  HOH A1004      16.282  35.253  12.433
ATOM   5078  H2  HOH A1004      15.100  34.725  13.178
ATOM   5079  O   HOH A1005      18.124  32.907  12.614
ATOM   5080  H1  HOH A1005      17.799  32.763  13.563
ATOM   5081  H2  HOH A1005      19.111  32.798  12.835
ATOM   5082  O   HOH A1006      13.195  34.846  25.807
ATOM   5083  H1  HOH A1006      12.640  35.279  25.089
ATOM   5084  H2  HOH A1006      14.087  34.981  25.344
ATOM   5085  O   HOH A1007      13.552  33.314  15.312
ATOM   5086  H1  HOH A1007      14.450  33.305  15.770
ATOM   5087  H2  HOH A1007      13.905  33.405  14.371
ATOM   5088  O   HOH A1008      11.612  31.295  24.648
ATOM   5089  H1  HOH A1008      11.754  30.315  24.394
ATOM   5090  H2  HOH A1008      12.082  31.209  25.550
ATOM   5091  O   HOH A1009      16.952  34.666  11.266
ATOM   5092  H1  HOH A1009      17.618  34.898  10.557
ATOM   5093  H2  HOH A1009      17.507  33.961  11.735
ATOM   5094  O   HOH A1010      18.261  27.370  22.868
ATOM   5095  H1  HOH A1010      17.264  27.557  22.969
ATOM   5096  H2  HOH A1010      18.266  27.500  21.854
ATOM   5097  O   HOH A1011      18.464  27.850  20.420
ATOM   5098  H1  HOH A1011      18.624  27.152  19.692
ATOM   5099  H2  HOH A1011      18.230  28.592  19.776
ATOM   5100  O   HOH A1012      15.265  32.346  23.066
ATOM   5101  H1  HOH A1012      15.595  33.202  22.639
ATOM   5102  H2  HOH A1012      15.687  32.521  23.971
ATOM   5103  O   HOH A1013      18.684  31.903  24.905
ATOM   5104  H1  HOH A1013      18.912  30.992  25.264
ATOM   5105  H2  HOH A1013      19.534  32.359  25.219
ATOM   5106  O   HOH A1014      21.855  34.025  20.886
ATOM   5107  H1  HOH A1014      21.565  33.181  20.398
ATOM   5108  H2  HOH A1014      21.927  33.599  21.791
ATOM   5109  O   HOH A1015      14.715  31.998  10.941
ATOM   5110  H1  HOH A1015      14.238  31.120  10.833
ATOM   5111  H2  HOH A1015      14.315  32.445  10.129
ATOM   5112  O   HOH A1016      19.347  29.532  25.685
ATOM   5113  H1  HOH A1016      18.858  29.625  26.566
ATOM   5114  H2  HOH A1016      19.923  28.752  25.965
ATOM   5115  O   HOH A1017      22.559  29.375  26.933
ATOM   5116  H1  HOH A1017      21.887  28.673  26.620
ATOM   5117  H2  HOH A1017      22.961  28.780  27.656
ATOM   5118  O   HOH A1018      20.968  26.434  12.600
ATOM   5119  H1  HOH A1018      21.274  25.574  13.056
ATOM   5120  H2  HOH A1018      20.067  26.465  13.072
ATOM   5121  O   HOH A1019      13.792  29.600  10.840
ATOM   5122  H1  HOH A1019      14.503  29.361  11.517
ATOM   5123  H2  HOH A1019      14.158  29.010  10.099
ATOM   5124  O   HOH A1020      17.211  27.903   9.644
ATOM   5125  H1  HOH A1020      16.215  27.922   9.504
ATOM   5126  H2  HOH A1020      17.200  27.364  10.504
ATOM   5127  O   HOH A1021      11.770  38.046  11.919
ATOM   5128  H1  HOH A1021      11.249  37.186  11.804
ATOM   5129  H2  HOH A1021      12.685  37.601  11.972
ATOM   5130  O   HOH A1022      14.284  36.398  18.302
ATOM   5131  H1  HOH A1022      14.057  37.317  18.063
ATOM   5132  H2  HOH A1022      13.648  35.942  17.620
ATOM   5133  O   HOH A1023      10.214  32.556  17.527
ATOM   5134  H1  HOH A1023       9.802  31.639  17.401
ATOM   5135  H2  HOH A1023       9.866  32.937  16.657
ATOM   5136  O   HOH A1024      22.150  28.582  12.160
ATOM   5137  H1  HOH A1024      22.442  28.292  11.227
ATOM   5138  H2  HOH A1024      21.612  27.733  12.344
ATOM   5139  O   HOH A1025      22.374  34.229  13.721
ATOM   5140  H1  HOH A1025      22.445  34.851  14.503
ATOM   5141  H2  HOH A1025      22.172  34.958  13.028
ATOM   5142  O   HOH A1026      11.583  31.318  21.023
ATOM   5143  H1  HOH A1026      11.987  31.920  21.731
ATOM   5144  H2  HOH A1026      12.142  30.506  21.262
ATOM   5145  O   HOH A1027       9.498  30.372  28.956
ATOM   5146  H1  HOH A1027       8.557  30.307  28.582
ATOM   5147  H2  HOH A1027       9.572  31.386  28.841
ATOM   5148  O   HOH A1028      23.478  27.781  28.642
ATOM   5149  H1  HOH A1028      24.419  27.809  28.250
ATOM   5150  H2  HOH A1028      23.473  26.768  28.764
ATOM   5151  O   HOH A1029       8.516  28.320  13.095
ATOM   5152  H1  HOH A1029       9.162  27.991  13.773
ATOM   5153  H2  HOH A1029       7.724  27.768  13.425
ATOM   5154  O   HOH A1030      23.705  35.047  19.396
ATOM   5155  H1  HOH A1030      22.991  34.632  19.962
ATOM   5156  H2  HOH A1030      24.111  35.633  20.052
ATOM   5157  O   HOH A1031      25.406  30.056  21.436
ATOM   5158  H1  HOH A1031      24.614  30.378  21.976
ATOM   5159  H2  HOH A1031      24.883  29.894  20.579
ATOM   5160  O   HOH A1032      11.480  29.093  11.736
ATOM   5161  H1  HOH A1032      12.390  29.317  11.340
ATOM   5162  H2  HOH A1032      11.035  28.893  10.848
ATOM   5163  O   HOH A1033      11.743  26.921  13.023
ATOM   5164  H1  HOH A1033      12.758  27.033  13.057
ATOM   5165  H2  HOH A1033      11.583  27.796  12.529
ATOM   5166  O   HOH A1034      24.939  30.161  16.945
ATOM   5167  H1  HOH A1034      25.811  30.472  16.536
ATOM   5168  H2  HOH A1034      24.416  31.001  16.689
ATOM   5169  O   HOH A1035      10.002  24.002  18.858
ATOM   5170  H1  HOH A1035      10.974  23.872  18.600
ATOM   5171  H2  HOH A1035      10.190  24.054  19.863
ATOM   5172  O   HOH A1036      26.976  31.100  15.744
ATOM   5173  H1  HOH A1036      26.689  31.125  14.780
ATOM   5174  H2  HOH A1036      26.908  32.103  15.905
ATOM   5175  O   HOH A1037      23.383  24.782  23.318
ATOM   5176  H1  HOH A1037      23.988  25.341  22.692
ATOM   5177  H2  HOH A1037      23.390  23.972  22.688
ATOM   5178  O   HOH A1038      26.596  27.794  10.671
ATOM   5179  H1  HOH A1038      27.483  27.293  10.700
ATOM   5180  H2  HOH A1038      26.591  28.029  11.657
ATOM   5181  O   HOH A1039      26.443  28.438  13.104
ATOM   5182  H1  HOH A1039      25.517  28.096  13.287
ATOM   5183  H2  HOH A1039      26.243  29.417  13.238
ATOM   5184  O   HOH A1040       9.759  24.333  23.645
ATOM   5185  H1  HOH A1040       9.048  25.045  23.780
ATOM   5186  H2  HOH A1040      10.513  24.911  24.051
ATOM   5187  O   HOH A1041      19.384  25.704  24.405
ATOM   5188  H1  HOH A1041      18.917  26.374  23.796
ATOM   5189  H2  HOH A1041      20.318  26.042  24.221
ATOM   5190  O   HOH A1042      20.964  27.597  26.192
ATOM   5191  H1  HOH A1042      21.269  27.257  25.272
ATOM   5192  H2  HOH A1042      21.193  26.716  26.656
ATOM   5193  O   HOH A1043      14.088  25.433  24.866
ATOM   5194  H1  HOH A1043      14.888  24.969  24.436
ATOM   5195  H2  HOH A1043      13.963  24.706  25.580
ATOM   5196  O   HOH A1044      22.494  22.881  19.508
ATOM   5197  H1  HOH A1044      22.688  23.350  18.650
ATOM   5198  H2  HOH A1044      21.829  23.564  19.872
ATOM   5199  O   HOH A1045      21.719  26.622  24.023
ATOM   5200  H1  HOH A1045      22.415  25.972  23.706
ATOM   5201  H2  HOH A1045      21.998  27.391  23.428
ATOM   5202  O   HOH A1046      20.940  24.464  20.642
ATOM   5203  H1  HOH A1046      20.047  24.287  21.054
ATOM   5204  H2  HOH A1046      20.984  25.448  20.870
ATOM   5205  O   HOH A1047      24.273  27.087  19.727
ATOM   5206  H1  HOH A1047      24.674  26.896  18.819
ATOM   5207  H2  HOH A1047      24.208  28.083  19.603
ATOM   5208  O   HOH A1048      25.396  26.743  17.493
ATOM   5209  H1  HOH A1048      25.461  25.760  17.209
ATOM   5210  H2  HOH A1048      26.377  26.815  17.754
ATOM   5211  O   HOH A1049      12.179  25.221  16.221
ATOM   5212  H1  HOH A1049      12.845  25.950  15.957
ATOM   5213  H2  HOH A1049      11.366  25.761  16.138
ATOM   5214  O   HOH A1050      17.431  28.486  16.285
ATOM   5215  H1  HOH A1050      17.381  27.472  16.419
ATOM   5216  H2  HOH A1050      18.361  28.451  15.865
ATOM   5217  O   HOH A1051      21.743  26.983  16.166
ATOM   5218  H1  HOH A1051      22.651  27.436  16.078
ATOM   5219  H2  HOH A1051      21.655  27.148  17.167
ATOM   5220  O   HOH A1052      23.947  25.055  12.777
ATOM   5221  H1  HOH A1052      23.927  26.019  13.059
ATOM   5222  H2  HOH A1052      23.062  24.786  13.173
ATOM   5223  O   HOH A1053      14.248  27.088  13.074
ATOM   5224  H1  HOH A1053      14.737  26.325  12.641
ATOM   5225  H2  HOH A1053      14.882  27.818  12.794
ATOM   5226  O   HOH A1054      13.869  26.917  15.544
ATOM   5227  H1  HOH A1054      14.054  26.941  14.542
ATOM   5228  H2  HOH A1054      13.912  27.941  15.644
ATOM   5229  O   HOH A1055      14.302  27.907  24.945
ATOM   5230  H1  HOH A1055      14.972  27.919  24.182
ATOM   5231  H2  HOH A1055      14.222  26.886  24.965
ATOM   5232  O   HOH A1056      17.814  38.170  12.164
ATOM   5233  H1  HOH A1056      18.037  39.110  12.287
ATOM   5234  H2  HOH A1056      16.978  38.307  11.588
ATOM   5235  O   HOH A1057      21.647  25.327  27.074
ATOM   5236  H1  HOH A1057      20.943  24.917  27.686
ATOM   5237  H2  HOH A1057      22.376  25.337  27.787
ATOM   5238  O   HOH A1058      25.126  32.614  -1.047
ATOM   5239  H1  HOH A1058      24.378  32.643  -1.720
ATOM   5240  H2  HOH A1058      25.762  32.053  -1.608
ATOM   5241  O   HOH A1059      18.469  33.197   1.493
ATOM   5242  H1  HOH A1059      18.692  33.895   2.180
ATOM   5243  H2  HOH A1059      19.231  32.572   1.696
ATOM   5244  O   HOH A1060      14.100  37.490   2.511
ATOM   5245  H1  HOH A1060      13.467  36.784   2.920
ATOM   5246  H2  HOH A1060      13.418  38.242   2.575
ATOM   5247  O   HOH A1061      12.777  29.915  -4.913
ATOM   5248  H1  HOH A1061      12.382  30.830  -4.693
ATOM   5249  H2  HOH A1061      13.563  30.302  -5.441
ATOM   5250  O   HOH A1062      11.672  34.413   1.458
ATOM   5251  H1  HOH A1062      12.607  34.472   1.059
ATOM   5252  H2  HOH A1062      11.301  33.824   0.703
ATOM   5253  O   HOH A1063      18.805  36.911   1.457
ATOM   5254  H1  HOH A1063      18.260  36.645   0.648
ATOM   5255  H2  HOH A1063      19.198  37.726   1.113
ATOM   5256  O   HOH A1064      11.379  28.897   4.410
ATOM   5257  H1  HOH A1064      10.629  28.272   4.699
ATOM   5258  H2  HOH A1064      11.135  29.611   5.112
ATOM   5259  O   HOH A1065      20.277  31.435   1.746
ATOM   5260  H1  HOH A1065      20.027  30.463   1.962
ATOM   5261  H2  HOH A1065      20.325  31.265   0.739
ATOM   5262  O   HOH A1066      17.325  32.562  -4.819
ATOM   5263  H1  HOH A1066      16.916  32.898  -3.958
ATOM   5264  H2  HOH A1066      16.927  33.249  -5.428
ATOM   5265  O   HOH A1067      24.492  28.694  -0.647
ATOM   5266  H1  HOH A1067      24.863  27.963  -0.062
ATOM   5267  H2  HOH A1067      24.844  29.471  -0.105
ATOM   5268  O   HOH A1068      10.943  30.471   2.373
ATOM   5269  H1  HOH A1068      11.555  31.201   2.680
ATOM   5270  H2  HOH A1068      11.116  29.830   3.118
ATOM   5271  O   HOH A1069      14.924  33.084   2.658
ATOM   5272  H1  HOH A1069      15.584  33.537   3.267
ATOM   5273  H2  HOH A1069      15.577  32.434   2.246
ATOM   5274  O   HOH A1070      28.247  30.117   7.689
ATOM   5275  H1  HOH A1070      28.512  31.017   8.074
ATOM   5276  H2  HOH A1070      27.424  30.017   8.294
ATOM   5277  O   HOH A1071      13.670  28.002   5.052
ATOM   5278  H1  HOH A1071      12.785  28.383   4.732
ATOM   5279  H2  HOH A1071      13.258  27.213   5.544
ATOM   5280  O   HOH A1072      14.620  39.264   6.104
ATOM   5281  H1  HOH A1072      15.182  40.058   6.103
ATOM   5282  H2  HOH A1072      15.104  38.739   5.387
ATOM   5283  O   HOH A1073      24.399  29.831   2.837
ATOM   5284  H1  HOH A1073      23.529  29.375   2.618
ATOM   5285  H2  HOH A1073      24.589  30.183   1.908
ATOM   5286  O   HOH A1074      11.835  32.588   5.495
ATOM   5287  H1  HOH A1074      12.051  32.564   4.504
ATOM   5288  H2  HOH A1074      11.628  33.580   5.528
ATOM   5289  O   HOH A1075      14.443  38.442   8.569
ATOM   5290  H1  HOH A1075      14.391  38.813   7.642
ATOM   5291  H2  HOH A1075      13.471  38.493   8.793
ATOM   5292  O   HOH A1076      26.627  28.977   3.535
ATOM   5293  H1  HOH A1076      25.694  29.311   3.272
ATOM   5294  H2  HOH A1076      26.343  28.815   4.523
ATOM   5295  O   HOH A1077      16.466  28.426   0.084
ATOM   5296  H1  HOH A1077      17.301  27.896   0.323
ATOM   5297  H2  HOH A1077      16.985  29.262  -0.187
ATOM   5298  O   HOH A1078      25.605  34.284   0.774
ATOM   5299  H1  HOH A1078      25.398  35.099   0.298
ATOM   5300  H2  HOH A1078      25.417  33.619   0.033
ATOM   5301  O   HOH A1079      20.608  33.062  -2.180
ATOM   5302  H1  HOH A1079      19.837  33.449  -1.648
ATOM   5303  H2  HOH A1079      20.246  33.344  -3.084
ATOM   5304  O   HOH A1080      20.458  32.485  -6.399
ATOM   5305  H1  HOH A1080      20.194  33.087  -5.640
ATOM   5306  H2  HOH A1080      21.341  32.913  -6.599
ATOM   5307  O   HOH A1081      24.111  31.692   4.464
ATOM   5308  H1  HOH A1081      23.323  32.079   3.958
ATOM   5309  H2  HOH A1081      24.288  30.948   3.786
ATOM   5310  O   HOH A1082      14.064  34.397   0.696
ATOM   5311  H1  HOH A1082      14.363  33.735  -0.009
ATOM   5312  H2  HOH A1082      14.450  33.884   1.483
ATOM   5313  O   HOH A1083      26.718  33.222   2.744
ATOM   5314  H1  HOH A1083      27.116  32.506   2.163
ATOM   5315  H2  HOH A1083      26.263  33.723   1.979
ATOM   5316  O   HOH A1084      12.451  32.457   3.052
ATOM   5317  H1  HOH A1084      13.437  32.633   2.929
ATOM   5318  H2  HOH A1084      12.118  33.189   2.466
ATOM   5319  O   HOH A1085      15.745  38.535  10.814
ATOM   5320  H1  HOH A1085      15.005  38.048  11.276
ATOM   5321  H2  HOH A1085      15.303  38.610   9.918
ATOM   5322  O   HOH A1086      15.683  35.911   5.740
ATOM   5323  H1  HOH A1086      15.712  36.750   5.177
ATOM   5324  H2  HOH A1086      16.062  35.301   5.024
ATOM   5325  O   HOH A1087      28.447  25.364  -6.476
ATOM   5326  H1  HOH A1087      27.700  25.139  -7.117
ATOM   5327  H2  HOH A1087      29.034  24.554  -6.743
ATOM   5328  O   HOH A1088      12.509  33.151  -2.315
ATOM   5329  H1  HOH A1088      12.439  34.107  -2.659
ATOM   5330  H2  HOH A1088      12.264  32.719  -3.200
ATOM   5331  O   HOH A1089      12.157  39.125   5.320
ATOM   5332  H1  HOH A1089      13.103  39.188   5.623
ATOM   5333  H2  HOH A1089      12.316  39.220   4.337
ATOM   5334  O   HOH A1090      12.430  39.345   2.787
ATOM   5335  H1  HOH A1090      12.415  40.209   2.339
ATOM   5336  H2  HOH A1090      11.527  39.000   2.420
ATOM   5337  O   HOH A1091      23.924  29.858   8.667
ATOM   5338  H1  HOH A1091      23.653  30.839   8.729
ATOM   5339  H2  HOH A1091      23.797  29.828   7.642
ATOM   5340  O   HOH A1092      10.054  38.393   6.350
ATOM   5341  H1  HOH A1092      10.903  38.758   5.886
ATOM   5342  H2  HOH A1092      10.529  37.598   6.752
ATOM   5343  O   HOH A1093      14.400  27.568  -1.122
ATOM   5344  H1  HOH A1093      14.864  27.622  -2.010
ATOM   5345  H2  HOH A1093      15.196  27.895  -0.578
ATOM   5346  O   HOH A1094      19.324  30.047   5.309
ATOM   5347  H1  HOH A1094      18.552  30.234   5.956
ATOM   5348  H2  HOH A1094      18.763  29.477   4.682
ATOM   5349  O   HOH A1095      23.633  29.898   6.215
ATOM   5350  H1  HOH A1095      22.817  29.566   5.706
ATOM   5351  H2  HOH A1095      23.820  30.679   5.603
ATOM   5352  O   HOH A1096      20.947  32.183   7.884
ATOM   5353  H1  HOH A1096      20.725  31.436   8.541
ATOM   5354  H2  HOH A1096      21.914  32.277   8.188
ATOM   5355  O   HOH A1097      19.584  29.376  -4.086
ATOM   5356  H1  HOH A1097      18.747  29.442  -3.564
ATOM   5357  H2  HOH A1097      19.830  28.434  -3.877
ATOM   5358  O   HOH A1098      15.095  29.580   1.822
ATOM   5359  H1  HOH A1098      15.676  30.409   1.798
ATOM   5360  H2  HOH A1098      15.631  29.071   1.122
ATOM   5361  O   HOH A1099      14.643  32.715  -1.102
ATOM   5362  H1  HOH A1099      14.254  31.884  -0.621
ATOM   5363  H2  HOH A1099      13.788  32.870  -1.645
ATOM   5364  O   HOH A1100      23.154  32.664  -2.657
ATOM   5365  H1  HOH A1100      22.207  32.916  -2.437
ATOM   5366  H2  HOH A1100      23.267  33.336  -3.421
ATOM   5367  O   HOH A1101      17.351  33.022   6.237
ATOM   5368  H1  HOH A1101      17.452  32.052   6.473
ATOM   5369  H2  HOH A1101      18.146  33.368   6.739
ATOM   5370  O   HOH A1102      20.246  30.891  -0.705
ATOM   5371  H1  HOH A1102      20.512  31.599  -1.351
ATOM   5372  H2  HOH A1102      20.971  30.226  -0.929
ATOM   5373  O   HOH A1103      10.346  28.601   9.508
ATOM   5374  H1  HOH A1103      10.309  29.512   9.071
ATOM   5375  H2  HOH A1103      10.485  28.076   8.657
ATOM   5376  O   HOH A1104      17.902  30.223   9.288
ATOM   5377  H1  HOH A1104      17.625  29.249   9.462
ATOM   5378  H2  HOH A1104      17.515  30.563  10.174
ATOM   5379  O   HOH A1105       8.583  27.624   1.202
ATOM   5380  H1  HOH A1105       8.294  28.361   1.849
ATOM   5381  H2  HOH A1105       9.184  27.159   1.880
ATOM   5382  O   HOH A1106       8.857  29.373  -7.229
ATOM   5383  H1  HOH A1106       9.550  29.165  -6.523
ATOM   5384  H2  HOH A1106       9.522  29.472  -7.995
ATOM   5385  O   HOH A1107      22.016  32.444   3.243
ATOM   5386  H1  HOH A1107      21.491  32.199   4.081
ATOM   5387  H2  HOH A1107      21.367  31.999   2.598
ATOM   5388  O   HOH A1108      16.599  31.576   1.469
ATOM   5389  H1  HOH A1108      17.003  31.159   0.627
ATOM   5390  H2  HOH A1108      17.334  32.291   1.537
ATOM   5391  O   HOH A1109      13.572  30.814   0.036
ATOM   5392  H1  HOH A1109      13.946  30.291   0.788
ATOM   5393  H2  HOH A1109      12.966  30.115  -0.344
ATOM   5394  O   HOH A1110      19.524  33.748  -4.384
ATOM   5395  H1  HOH A1110      18.709  33.157  -4.516
ATOM   5396  H2  HOH A1110      19.039  34.616  -4.537
ATOM   5397  O   HOH A1111      22.189  28.634   2.577
ATOM   5398  H1  HOH A1111      21.998  28.779   3.572
ATOM   5399  H2  HOH A1111      21.226  28.773   2.291
ATOM   5400  O   HOH A1112      17.880  35.693  -4.987
ATOM   5401  H1  HOH A1112      17.318  35.196  -5.675
ATOM   5402  H2  HOH A1112      18.143  36.448  -5.536
ATOM   5403  O   HOH A1113      24.889  26.412   9.535
ATOM   5404  H1  HOH A1113      25.588  26.954  10.058
ATOM   5405  H2  HOH A1113      25.380  26.547   8.637
ATOM   5406  O   HOH A1114      11.375  36.556   7.562
ATOM   5407  H1  HOH A1114      10.949  35.947   8.265
ATOM   5408  H2  HOH A1114      11.732  37.222   8.227
ATOM   5409  O   HOH A1115      16.721  34.263   4.121
ATOM   5410  H1  HOH A1115      17.077  33.706   4.885
ATOM   5411  H2  HOH A1115      17.615  34.584   3.784
ATOM   5412  O   HOH A1116      12.181  28.974  -1.081
ATOM   5413  H1  HOH A1116      11.480  28.276  -0.909
ATOM   5414  H2  HOH A1116      12.966  28.358  -1.144
ATOM   5415  O   HOH A1117      14.995  33.647   6.855
ATOM   5416  H1  HOH A1117      15.034  34.562   6.447
ATOM   5417  H2  HOH A1117      15.960  33.402   6.635
ATOM   5418  O   HOH A1118      14.204  36.716  -2.081
ATOM   5419  H1  HOH A1118      14.495  36.824  -1.128
ATOM   5420  H2  HOH A1118      15.109  36.472  -2.454
ATOM   5421  O   HOH A1119      21.489  30.480  -5.175
ATOM   5422  H1  HOH A1119      20.670  30.007  -4.761
ATOM   5423  H2  HOH A1119      20.957  31.224  -5.592
ATOM   5424  O   HOH A1120      18.251  35.558   9.241
ATOM   5425  H1  HOH A1120      18.645  35.019   8.493
ATOM   5426  H2  HOH A1120      17.465  35.923   8.745
ATOM   5427  O   HOH A1121      22.923  33.183  -6.817
ATOM   5428  H1  HOH A1121      23.366  33.423  -7.713
ATOM   5429  H2  HOH A1121      23.110  32.194  -6.901
ATOM   5430  O   HOH A1122      15.056  36.650   0.344
ATOM   5431  H1  HOH A1122      14.622  35.737   0.505
ATOM   5432  H2  HOH A1122      14.700  37.056   1.209
ATOM   5433  O   HOH A1123      11.251  35.061   5.516
ATOM   5434  H1  HOH A1123      11.414  35.654   6.323
ATOM   5435  H2  HOH A1123      10.239  35.171   5.531
ATOM   5436  O   HOH A1124      13.695  33.304   9.023
ATOM   5437  H1  HOH A1124      14.177  33.424   8.140
ATOM   5438  H2  HOH A1124      14.090  34.141   9.455
ATOM   5439  O   HOH A1125      17.388  36.953  14.415
ATOM   5440  H1  HOH A1125      17.603  37.462  13.580
ATOM   5441  H2  HOH A1125      16.652  36.387  14.011
ATOM   5442  O   HOH A1126      25.222  33.729   7.479
ATOM   5443  H1  HOH A1126      24.521  34.409   7.163
ATOM   5444  H2  HOH A1126      25.550  33.503   6.552
ATOM   5445  O   HOH A1127       7.209  31.070  -4.655
ATOM   5446  H1  HOH A1127       6.736  30.167  -4.671
ATOM   5447  H2  HOH A1127       6.433  31.580  -4.260
ATOM   5448  O   HOH A1128      18.538  33.907  -0.906
ATOM   5449  H1  HOH A1128      18.505  33.594   0.063
ATOM   5450  H2  HOH A1128      18.193  34.831  -0.725
ATOM   5451  O   HOH A1129      13.922  25.204  -0.108
ATOM   5452  H1  HOH A1129      13.998  26.144  -0.462
ATOM   5453  H2  HOH A1129      14.753  24.851  -0.568
ATOM   5454  O   HOH A1130      10.617  27.065   7.480
ATOM   5455  H1  HOH A1130      10.383  26.175   7.914
ATOM   5456  H2  HOH A1130      11.471  26.732   7.043
ATOM   5457  O   HOH A1131      12.315  35.531  -3.089
ATOM   5458  H1  HOH A1131      13.088  36.057  -2.642
ATOM   5459  H2  HOH A1131      12.476  35.847  -3.997
ATOM   5460  O   HOH A1132      21.620  29.020   4.987
ATOM   5461  H1  HOH A1132      21.431  28.149   5.488
ATOM   5462  H2  HOH A1132      20.700  29.414   5.145
ATOM   5463  O   HOH A1133      25.008  28.576  -3.089
ATOM   5464  H1  HOH A1133      24.272  29.280  -3.241
ATOM   5465  H2  HOH A1133      24.854  28.549  -2.077
ATOM   5466  O   HOH A1134      16.588  33.393  -2.558
ATOM   5467  H1  HOH A1134      17.320  33.412  -1.876
ATOM   5468  H2  HOH A1134      15.854  33.068  -1.937
ATOM   5469  O   HOH A1135      20.794  32.050   5.376
ATOM   5470  H1  HOH A1135      20.880  32.010   6.390
ATOM   5471  H2  HOH A1135      20.164  31.249   5.315
ATOM   5472  O   HOH A1136      22.131  29.246  -1.240
ATOM   5473  H1  HOH A1136      22.455  29.607  -2.135
ATOM   5474  H2  HOH A1136      23.073  29.027  -0.907
ATOM   5475  O   HOH A1137      17.134  30.358  -5.954
ATOM   5476  H1  HOH A1137      17.828  30.541  -6.679
ATOM   5477  H2  HOH A1137      17.294  31.245  -5.471
ATOM   5478  O   HOH A1138      25.830  28.687   5.811
ATOM   5479  H1  HOH A1138      24.958  29.115   6.044
ATOM   5480  H2  HOH A1138      25.846  27.994   6.525
ATOM   5481  O   HOH A1139      21.510  34.911   3.160
ATOM   5482  H1  HOH A1139      21.804  33.943   3.086
ATOM   5483  H2  HOH A1139      22.126  35.295   2.512
ATOM   5484  O   HOH A1140      16.469  35.899  -2.887
ATOM   5485  H1  HOH A1140      16.442  34.887  -2.825
ATOM   5486  H2  HOH A1140      17.032  35.923  -3.730
ATOM   5487  O   HOH A1141       9.533  34.810  -5.959
ATOM   5488  H1  HOH A1141       8.653  34.527  -6.368
ATOM   5489  H2  HOH A1141       9.193  35.414  -5.281
ATOM   5490  O   HOH A1142      19.592  36.601  11.175
ATOM   5491  H1  HOH A1142      19.070  36.267  10.392
ATOM   5492  H2  HOH A1142      18.885  37.198  11.560
ATOM   5493  O   HOH A1143      10.300  35.126   9.287
ATOM   5494  H1  HOH A1143      10.683  34.212   9.502
ATOM   5495  H2  HOH A1143      10.348  35.474  10.243
ATOM   5496  O   HOH A1144      15.979  36.417   8.227
ATOM   5497  H1  HOH A1144      15.422  37.252   8.294
ATOM   5498  H2  HOH A1144      15.857  36.271   7.237
ATOM   5499  O   HOH A1145      11.348  32.881   9.811
ATOM   5500  H1  HOH A1145      11.603  33.037  10.776
ATOM   5501  H2  HOH A1145      12.290  33.011   9.443
ATOM   5502  O   HOH A1146      17.388  36.223  -0.518
ATOM   5503  H1  HOH A1146      16.472  36.438  -0.124
ATOM   5504  H2  HOH A1146      17.079  36.231  -1.478
ATOM   5505  O   HOH A1147      13.933  31.397   6.339
ATOM   5506  H1  HOH A1147      13.064  31.802   6.032
ATOM   5507  H2  HOH A1147      14.397  32.276   6.517
ATOM   5508  O   HOH A1148      21.847  35.933  11.999
ATOM   5509  H1  HOH A1148      22.317  36.216  11.201
ATOM   5510  H2  HOH A1148      20.903  36.197  11.706
ATOM   5511  O   HOH A1149      23.355  32.321   8.647
ATOM   5512  H1  HOH A1149      23.507  32.562   9.620
ATOM   5513  H2  HOH A1149      24.082  32.884   8.263
ATOM   5514  O   HOH A1150      15.101  29.257   6.738
ATOM   5515  H1  HOH A1150      14.574  28.757   6.030
ATOM   5516  H2  HOH A1150      14.599  30.147   6.586
ATOM   5517  O   HOH A1151      18.066  28.447   3.840
ATOM   5518  H1  HOH A1151      17.092  28.186   3.725
ATOM   5519  H2  HOH A1151      18.287  27.690   4.488
ATOM   5520  O   HOH A1152      18.946  35.069   3.124
ATOM   5521  H1  HOH A1152      19.953  35.091   3.179
ATOM   5522  H2  HOH A1152      18.874  35.874   2.492
ATOM   5523  O   HOH A1153      19.365  34.094   7.423
ATOM   5524  H1  HOH A1153      19.973  33.333   7.725
ATOM   5525  H2  HOH A1153      20.029  34.493   6.782
ATOM   5526  O   HOH A1154      21.260  34.552   5.685
ATOM   5527  H1  HOH A1154      21.363  34.828   4.723
ATOM   5528  H2  HOH A1154      21.089  33.576   5.502
ATOM   5529  O   HOH A1155      16.510  34.303  -6.565
ATOM   5530  H1  HOH A1155      15.541  33.996  -6.668
ATOM   5531  H2  HOH A1155      16.734  34.197  -7.551
ATOM   5532  O   HOH A1156      17.415  30.529   6.843
ATOM   5533  H1  HOH A1156      17.580  30.418   7.840
ATOM   5534  H2  HOH A1156      16.571  29.988   6.808
ATOM   5535  O   HOH A1157      20.396  30.310   9.450
ATOM   5536  H1  HOH A1157      19.377  30.300   9.400
ATOM   5537  H2  HOH A1157      20.508  29.370   9.080
ATOM   5538  O   HOH A1158      23.187  30.634  -7.016
ATOM   5539  H1  HOH A1158      23.901  30.079  -6.653
ATOM   5540  H2  HOH A1158      22.501  30.483  -6.284
ATOM   5541  O   HOH A1159      14.669  30.935  -6.216
ATOM   5542  H1  HOH A1159      14.648  30.597  -7.204
ATOM   5543  H2  HOH A1159      15.641  30.678  -6.092
ATOM   5544  O   HOH A1160      16.821  27.881  -5.584
ATOM   5545  H1  HOH A1160      17.690  27.523  -5.956
ATOM   5546  H2  HOH A1160      17.019  28.858  -5.763
ATOM   5547  O   HOH A1161      10.815  33.079  -0.431
ATOM   5548  H1  HOH A1161      10.071  33.401  -1.046
ATOM   5549  H2  HOH A1161      11.520  33.039  -1.162
ATOM   5550  O   HOH A1162      23.166  30.238  -3.319
ATOM   5551  H1  HOH A1162      23.221  31.225  -3.086
ATOM   5552  H2  HOH A1162      22.507  30.355  -4.082
ATOM   5553  O   HOH A1163      12.565  35.815   3.464
ATOM   5554  H1  HOH A1163      12.058  35.512   4.277
ATOM   5555  H2  HOH A1163      12.084  35.268   2.790
ATOM   5556  O   HOH A1164      26.072  33.073   5.134
ATOM   5557  H1  HOH A1164      25.259  32.493   4.893
ATOM   5558  H2  HOH A1164      26.341  33.197   4.143
ATOM   5559  O   HOH A1165      10.240  30.965   8.563
ATOM   5560  H1  HOH A1165       9.359  31.472   8.457
ATOM   5561  H2  HOH A1165      10.701  31.708   9.079
ATOM   5562  O   HOH A1166      22.873  27.911   9.843
ATOM   5563  H1  HOH A1166      23.339  28.697   9.392
ATOM   5564  H2  HOH A1166      23.639  27.260   9.714
ATOM   5565  O   HOH A1167      11.767  32.189  -4.532
ATOM   5566  H1  HOH A1167      10.773  32.174  -4.345
ATOM   5567  H2  HOH A1167      11.714  32.800  -5.339
ATOM   5568  O   HOH A1168      25.201  30.736   0.653
ATOM   5569  H1  HOH A1168      26.149  30.977   0.924
ATOM   5570  H2  HOH A1168      25.083  31.518   0.019
ATOM   5571  O   HOH A1169      23.431  35.292   6.803
ATOM   5572  H1  HOH A1169      23.223  36.233   6.908
ATOM   5573  H2  HOH A1169      22.561  34.979   6.405
ATOM   5574  O   HOH A1170      14.225  33.351  -6.899
ATOM   5575  H1  HOH A1170      14.307  32.397  -6.579
ATOM   5576  H2  HOH A1170      13.269  33.487  -6.634
ATOM   5577  O   HOH A1171      12.985  25.759  -6.106
ATOM   5578  H1  HOH A1171      13.142  26.428  -5.331
ATOM   5579  H2  HOH A1171      13.904  25.942  -6.518
ATOM   5580  O   HOH A1172      26.740  31.049  -2.157
ATOM   5581  H1  HOH A1172      27.245  30.430  -1.564
ATOM   5582  H2  HOH A1172      26.916  30.602  -3.024
ATOM   5583  O   HOH A1173      10.078  26.556   2.919
ATOM   5584  H1  HOH A1173      10.986  26.920   2.911
ATOM   5585  H2  HOH A1173       9.831  26.840   3.870
ATOM   5586  O   HOH A1174      27.593  31.272   1.277
ATOM   5587  H1  HOH A1174      28.158  30.852   2.003
ATOM   5588  H2  HOH A1174      27.895  30.664   0.535
ATOM   5589  O   HOH A1175      26.209  26.804   7.492
ATOM   5590  H1  HOH A1175      27.181  27.089   7.520
ATOM   5591  H2  HOH A1175      26.352  26.030   6.848
ATOM   5592  O   HOH A1176      27.014  29.518  -4.255
ATOM   5593  H1  HOH A1176      27.752  28.896  -3.987
ATOM   5594  H2  HOH A1176      26.264  29.052  -3.764
ATOM   5595  O   HOH A1177      24.052  33.527  -9.009
ATOM   5596  H1  HOH A1177      24.418  34.169  -9.634
ATOM   5597  H2  HOH A1177      24.358  32.675  -9.445
ATOM   5598  O   HOH A1178       9.583  27.330   5.228
ATOM   5599  H1  HOH A1178       9.939  27.265   6.181
ATOM   5600  H2  HOH A1178       8.621  27.097   5.493
ATOM   5601  O   HOH A1179      14.802  35.258  10.115
ATOM   5602  H1  HOH A1179      15.281  35.733   9.352
ATOM   5603  H2  HOH A1179      15.655  34.972  10.588
ATOM   5604  O   HOH A1180      18.586  26.596   8.025
ATOM   5605  H1  HOH A1180      17.984  27.114   8.668
ATOM   5606  H2  HOH A1180      19.432  27.079   8.302
ATOM   5607  O   HOH A1181      20.704  27.977   8.528
ATOM   5608  H1  HOH A1181      21.022  27.593   7.659
ATOM   5609  H2  HOH A1181      21.551  27.808   9.052
ATOM   5610  O   HOH A1182      12.669  26.099   6.365
ATOM   5611  H1  HOH A1182      12.577  25.127   6.101
ATOM   5612  H2  HOH A1182      13.270  25.930   7.166
ATOM   5613  O   HOH A1183      21.550  24.500   5.670
ATOM   5614  H1  HOH A1183      22.092  24.527   4.820
ATOM   5615  H2  HOH A1183      20.757  24.013   5.292
ATOM   5616  O   HOH A1184      21.068  26.920   6.192
ATOM   5617  H1  HOH A1184      21.331  25.949   6.051
ATOM   5618  H2  HOH A1184      20.123  26.811   5.836
ATOM   5619  O   HOH A1185      11.924  38.369   9.329
ATOM   5620  H1  HOH A1185      11.892  38.342  10.333
ATOM   5621  H2  HOH A1185      11.004  38.748   9.193
ATOM   5622  O   HOH A1186      19.714  29.032   2.075
ATOM   5623  H1  HOH A1186      19.012  28.806   2.787
ATOM   5624  H2  HOH A1186      19.327  28.390   1.385
ATOM   5625  O   HOH A1187      23.058  26.409   1.750
ATOM   5626  H1  HOH A1187      23.980  26.642   1.436
ATOM   5627  H2  HOH A1187      22.788  27.319   2.079
ATOM   5628  O   HOH A1188      25.386  26.815   0.782
ATOM   5629  H1  HOH A1188      25.826  25.959   0.489
ATOM   5630  H2  HOH A1188      26.258  27.267   1.074
ATOM   5631  O   HOH A1189      13.443  27.501  -4.422
ATOM   5632  H1  HOH A1189      14.297  27.643  -3.939
ATOM   5633  H2  HOH A1189      13.195  28.464  -4.557
ATOM   5634  O   HOH A1190      17.755  30.496  -0.511
ATOM   5635  H1  HOH A1190      17.622  30.299  -1.497
ATOM   5636  H2  HOH A1190      18.758  30.640  -0.581
ATOM   5637  O   HOH A1191      22.088  26.574  -0.758
ATOM   5638  H1  HOH A1191      21.908  27.541  -0.752
ATOM   5639  H2  HOH A1191      22.365  26.444   0.180
ATOM   5640  O   HOH A1192      26.854  28.838  -6.682
ATOM   5641  H1  HOH A1192      26.878  29.194  -5.730
ATOM   5642  H2  HOH A1192      27.782  28.429  -6.650
ATOM   5643  O   HOH A1193      15.807  27.708  -3.343
ATOM   5644  H1  HOH A1193      16.303  26.833  -3.123
ATOM   5645  H2  HOH A1193      16.207  27.751  -4.297
ATOM   5646  O   HOH A1194      17.303  29.765  -2.886
ATOM   5647  H1  HOH A1194      16.679  28.984  -2.977
ATOM   5648  H2  HOH A1194      16.881  30.369  -3.527
ATOM   5649  O   HOH A1195      14.776  28.122   9.025
ATOM   5650  H1  HOH A1195      14.868  28.527   8.108
ATOM   5651  H2  HOH A1195      14.440  27.222   8.732
ATOM   5652  O   HOH A1196      20.863  25.368  10.311
ATOM   5653  H1  HOH A1196      20.990  25.896  11.161
ATOM   5654  H2  HOH A1196      19.898  25.139  10.470
ATOM   5655  O   HOH A1197      11.318  31.886  -9.984
ATOM   5656  H1  HOH A1197      11.199  32.165 -10.903
ATOM   5657  H2  HOH A1197      11.492  32.777  -9.560
ATOM   5658  O   HOH A1198      16.616  30.001 -13.699
ATOM   5659  H1  HOH A1198      16.743  30.583 -14.471
ATOM   5660  H2  HOH A1198      17.409  29.393 -13.837
ATOM   5661  O   HOH A1199      20.411  30.843 -10.830
ATOM   5662  H1  HOH A1199      20.483  30.112 -11.500
ATOM   5663  H2  HOH A1199      21.268  30.682 -10.346
ATOM   5664  O   HOH A1200      14.533  31.199 -10.840
ATOM   5665  H1  HOH A1200      14.113  32.060 -10.647
ATOM   5666  H2  HOH A1200      13.765  30.743 -11.303
ATOM   5667  O   HOH A1201      18.898  30.922  -7.648
ATOM   5668  H1  HOH A1201      19.527  31.589  -7.222
ATOM   5669  H2  HOH A1201      18.724  31.449  -8.488
ATOM   5670  O   HOH A1202      25.823  25.127 -10.443
ATOM   5671  H1  HOH A1202      26.274  25.767 -11.020
ATOM   5672  H2  HOH A1202      24.874  25.291 -10.746
ATOM   5673  O   HOH A1203      14.713  30.164  -8.513
ATOM   5674  H1  HOH A1203      14.653  30.545  -9.433
ATOM   5675  H2  HOH A1203      14.826  29.200  -8.775
ATOM   5676  O   HOH A1204      20.579  28.971 -12.663
ATOM   5677  H1  HOH A1204      19.725  28.736 -13.169
ATOM   5678  H2  HOH A1204      21.073  29.356 -13.407
ATOM   5679  O   HOH A1205      18.247  35.495 -10.499
ATOM   5680  H1  HOH A1205      19.152  35.276 -10.762
ATOM   5681  H2  HOH A1205      18.059  36.280 -11.031
ATOM   5682  O   HOH A1206      16.881  30.509 -11.205
ATOM   5683  H1  HOH A1206      16.788  30.349 -12.198
ATOM   5684  H2  HOH A1206      15.915  30.825 -11.077
ATOM   5685  O   HOH A1207      19.699  25.008 -12.088
ATOM   5686  H1  HOH A1207      20.377  25.740 -11.887
ATOM   5687  H2  HOH A1207      18.921  25.489 -11.636
ATOM   5688  O   HOH A1208      18.414  32.011  -9.892
ATOM   5689  H1  HOH A1208      17.786  31.428 -10.447
ATOM   5690  H2  HOH A1208      19.263  31.617 -10.316
ATOM   5691  O   HOH A1209      23.464  34.232  -4.568
ATOM   5692  H1  HOH A1209      23.259  33.851  -5.480
ATOM   5693  H2  HOH A1209      23.847  35.079  -4.838
ATOM   5694  O   HOH A1210      16.958  33.927  -9.058
ATOM   5695  H1  HOH A1210      17.459  34.616  -9.630
ATOM   5696  H2  HOH A1210      17.539  33.148  -9.363
ATOM   5697  O   HOH A1211      26.604  30.640  -8.438
ATOM   5698  H1  HOH A1211      26.648  29.888  -7.764
ATOM   5699  H2  HOH A1211      27.413  31.113  -8.181
ATOM   5700  O   HOH A1212      14.513  28.472 -13.383
ATOM   5701  H1  HOH A1212      13.886  29.037 -12.832
ATOM   5702  H2  HOH A1212      15.211  29.173 -13.531
ATOM   5703  O   HOH A1213      10.488  29.849 -12.948
ATOM   5704  H1  HOH A1213      10.380  28.904 -13.271
ATOM   5705  H2  HOH A1213       9.553  30.071 -12.797
ATOM   5706  O   HOH A1214      19.450  28.566  -8.376
ATOM   5707  H1  HOH A1214      18.651  28.518  -9.009
ATOM   5708  H2  HOH A1214      19.260  29.514  -8.064
ATOM   5709  O   HOH A1215      24.846  31.335 -10.036
ATOM   5710  H1  HOH A1215      25.357  31.155 -10.845
ATOM   5711  H2  HOH A1215      25.567  31.038  -9.363
ATOM   5712  O   HOH A1216      15.111  27.740  -9.074
ATOM   5713  H1  HOH A1216      14.476  27.101  -9.542
ATOM   5714  H2  HOH A1216      15.156  27.203  -8.212
ATOM   5715  O   HOH A1217      21.689  27.958  -9.330
ATOM   5716  H1  HOH A1217      20.795  28.227  -8.921
ATOM   5717  H2  HOH A1217      22.050  28.900  -9.403
ATOM   5718  O   HOH A1218      21.334  26.839 -11.533
ATOM   5719  H1  HOH A1218      21.059  27.698 -12.003
ATOM   5720  H2  HOH A1218      21.452  27.281 -10.620
ATOM   5721  O   HOH A1219      17.427  28.422  -9.864
ATOM   5722  H1  HOH A1219      17.198  29.253 -10.389
ATOM   5723  H2  HOH A1219      16.487  28.218  -9.556
ATOM   5724  O   HOH A1220      22.573  30.332  -9.467
ATOM   5725  H1  HOH A1220      22.764  30.499  -8.484
ATOM   5726  H2  HOH A1220      23.449  30.726  -9.794
ATOM   5727  O   HOH A1221      21.620  17.302  33.593
ATOM   5728  H1  HOH A1221      22.464  17.009  33.124
ATOM   5729  H2  HOH A1221      21.758  18.295  33.444
ATOM   5730  O   HOH A1222      18.025  16.234  34.008
ATOM   5731  H1  HOH A1222      18.809  15.841  33.488
ATOM   5732  H2  HOH A1222      18.587  16.876  34.546
ATOM   5733  O   HOH A1223      12.905  17.575  36.546
ATOM   5734  H1  HOH A1223      12.990  17.423  37.566
ATOM   5735  H2  HOH A1223      13.881  17.355  36.370
ATOM   5736  O   HOH A1224      22.960  21.994  33.244
ATOM   5737  H1  HOH A1224      22.328  22.330  32.538
ATOM   5738  H2  HOH A1224      23.698  22.637  33.068
ATOM   5739  O   HOH A1225      12.119  19.877  36.138
ATOM   5740  H1  HOH A1225      12.417  18.902  36.271
ATOM   5741  H2  HOH A1225      12.955  20.266  36.569
ATOM   5742  O   HOH A1226      12.795  13.078  28.961
ATOM   5743  H1  HOH A1226      11.789  13.198  28.948
ATOM   5744  H2  HOH A1226      12.872  12.862  27.965
ATOM   5745  O   HOH A1227      12.725  14.501  36.105
ATOM   5746  H1  HOH A1227      11.931  15.121  36.009
ATOM   5747  H2  HOH A1227      13.189  14.811  35.258
ATOM   5748  O   HOH A1228      17.446  20.453  34.157
ATOM   5749  H1  HOH A1228      17.167  21.415  34.250
ATOM   5750  H2  HOH A1228      16.618  20.050  34.576
ATOM   5751  O   HOH A1229      19.754  17.640  35.291
ATOM   5752  H1  HOH A1229      20.543  17.506  34.670
ATOM   5753  H2  HOH A1229      19.788  18.632  35.315
ATOM   5754  O   HOH A1230      13.602  10.008  36.384
ATOM   5755  H1  HOH A1230      14.333  10.579  36.821
ATOM   5756  H2  HOH A1230      13.015  10.831  36.175
ATOM   5757  O   HOH A1231      21.649  13.667  33.626
ATOM   5758  H1  HOH A1231      22.560  14.021  33.908
ATOM   5759  H2  HOH A1231      22.016  13.126  32.845
ATOM   5760  O   HOH A1232      14.166  11.161  29.861
ATOM   5761  H1  HOH A1232      15.010  11.711  29.753
ATOM   5762  H2  HOH A1232      13.543  11.885  29.508
ATOM   5763  O   HOH A1233      23.958  10.907  30.211
ATOM   5764  H1  HOH A1233      23.422  10.225  29.689
ATOM   5765  H2  HOH A1233      24.604  10.250  30.622
ATOM   5766  O   HOH A1234      16.098  12.295  35.322
ATOM   5767  H1  HOH A1234      15.704  12.090  36.243
ATOM   5768  H2  HOH A1234      16.481  11.357  35.204
ATOM   5769  O   HOH A1235      16.539  14.874  35.656
ATOM   5770  H1  HOH A1235      17.151  15.169  34.930
ATOM   5771  H2  HOH A1235      16.482  13.909  35.429
ATOM   5772  O   HOH A1236      16.426  11.014  39.671
ATOM   5773  H1  HOH A1236      17.357  11.230  39.285
ATOM   5774  H2  HOH A1236      16.590  11.333  40.573
ATOM   5775  O   HOH A1237      21.671  19.817  33.335
ATOM   5776  H1  HOH A1237      21.005  20.129  34.029
ATOM   5777  H2  HOH A1237      22.249  20.648  33.363
ATOM   5778  O   HOH A1238      15.398  17.140  36.302
ATOM   5779  H1  HOH A1238      15.683  16.278  35.866
ATOM   5780  H2  HOH A1238      15.959  17.050  37.114
ATOM   5781  O   HOH A1239      29.816  10.830  34.272
ATOM   5782  H1  HOH A1239      30.095   9.894  34.065
ATOM   5783  H2  HOH A1239      30.087  11.253  33.412
ATOM   5784  O   HOH A1240      19.898  13.344  37.346
ATOM   5785  H1  HOH A1240      19.728  13.188  36.351
ATOM   5786  H2  HOH A1240      19.755  14.339  37.314
ATOM   5787  O   HOH A1241      11.300  17.357  28.590
ATOM   5788  H1  HOH A1241      10.980  17.993  27.850
ATOM   5789  H2  HOH A1241      11.339  18.090  29.302
ATOM   5790  O   HOH A1242      25.387  10.976  34.633
ATOM   5791  H1  HOH A1242      26.310  11.315  34.930
ATOM   5792  H2  HOH A1242      25.302  11.649  33.881
ATOM   5793  O   HOH A1243      20.042   9.769  32.763
ATOM   5794  H1  HOH A1243      19.403   9.347  32.074
ATOM   5795  H2  HOH A1243      20.182  10.613  32.213
ATOM   5796  O   HOH A1244      27.323  21.071  30.779
ATOM   5797  H1  HOH A1244      26.921  21.998  30.709
ATOM   5798  H2  HOH A1244      26.986  20.749  29.881
ATOM   5799  O   HOH A1245      20.515  15.340  29.107
ATOM   5800  H1  HOH A1245      19.682  15.286  29.707
ATOM   5801  H2  HOH A1245      20.575  16.368  29.201
ATOM   5802  O   HOH A1246      20.285  12.779  28.997
ATOM   5803  H1  HOH A1246      19.340  12.906  28.605
ATOM   5804  H2  HOH A1246      20.515  13.758  28.979
ATOM   5805  O   HOH A1247      24.879  17.931  30.890
ATOM   5806  H1  HOH A1247      25.413  18.452  31.558
ATOM   5807  H2  HOH A1247      24.428  17.310  31.551
ATOM   5808  O   HOH A1248      15.786  16.579  32.950
ATOM   5809  H1  HOH A1248      15.990  15.898  32.238
ATOM   5810  H2  HOH A1248      16.707  16.523  33.392
ATOM   5811  O   HOH A1249      15.375  19.415  35.160
ATOM   5812  H1  HOH A1249      14.958  19.937  35.918
ATOM   5813  H2  HOH A1249      15.403  18.528  35.642
ATOM   5814  O   HOH A1250      15.155  11.600  37.545
ATOM   5815  H1  HOH A1250      14.646  12.423  37.891
ATOM   5816  H2  HOH A1250      15.615  11.402  38.421
ATOM   5817  O   HOH A1251      22.925  18.647  29.544
ATOM   5818  H1  HOH A1251      23.301  18.223  28.696
ATOM   5819  H2  HOH A1251      23.723  18.375  30.124
ATOM   5820  O   HOH A1252      19.821  20.428  34.963
ATOM   5821  H1  HOH A1252      19.796  21.419  35.149
ATOM   5822  H2  HOH A1252      18.852  20.366  34.658
ATOM   5823  O   HOH A1253      27.799   6.731  27.121
ATOM   5824  H1  HOH A1253      26.897   6.710  27.606
ATOM   5825  H2  HOH A1253      27.971   7.714  27.304
ATOM   5826  O   HOH A1254      13.889  14.884  30.330
ATOM   5827  H1  HOH A1254      13.832  15.546  29.553
ATOM   5828  H2  HOH A1254      13.477  14.114  29.799
ATOM   5829  O   HOH A1255      10.916  16.249  35.715
ATOM   5830  H1  HOH A1255      10.834  16.648  34.789
ATOM   5831  H2  HOH A1255      11.648  16.869  36.035
ATOM   5832  O   HOH A1256      12.177  19.027  32.574
ATOM   5833  H1  HOH A1256      11.968  19.112  31.594
ATOM   5834  H2  HOH A1256      13.170  18.923  32.494
ATOM   5835  O   HOH A1257      21.515  22.716  31.287
ATOM   5836  H1  HOH A1257      20.572  22.572  30.979
ATOM   5837  H2  HOH A1257      21.936  22.032  30.653
ATOM   5838  O   HOH A1258      15.447  22.814  31.050
ATOM   5839  H1  HOH A1258      15.493  21.809  30.946
ATOM   5840  H2  HOH A1258      14.755  22.798  31.797
ATOM   5841  O   HOH A1259      24.232  22.908  28.867
ATOM   5842  H1  HOH A1259      23.630  22.214  29.302
ATOM   5843  H2  HOH A1259      24.066  22.585  27.923
ATOM   5844  O   HOH A1260      22.673  24.898  31.326
ATOM   5845  H1  HOH A1260      22.184  23.995  31.350
ATOM   5846  H2  HOH A1260      23.473  24.574  31.851
ATOM   5847  O   HOH A1261      16.963   9.919  35.145
ATOM   5848  H1  HOH A1261      17.974  10.055  35.144
ATOM   5849  H2  HOH A1261      16.987   9.204  35.877
ATOM   5850  O   HOH A1262      18.588   9.076  27.474
ATOM   5851  H1  HOH A1262      19.353   9.711  27.702
ATOM   5852  H2  HOH A1262      18.857   8.377  28.169
ATOM   5853  O   HOH A1263      19.426  10.338  35.151
ATOM   5854  H1  HOH A1263      19.533  11.338  35.057
ATOM   5855  H2  HOH A1263      19.738  10.110  34.214
ATOM   5856  O   HOH A1264      16.128  14.565  31.394
ATOM   5857  H1  HOH A1264      15.752  13.997  32.161
ATOM   5858  H2  HOH A1264      15.213  14.726  30.962
ATOM   5859  O   HOH A1265      22.655  14.841  30.452
ATOM   5860  H1  HOH A1265      21.830  15.045  29.919
ATOM   5861  H2  HOH A1265      23.316  15.102  29.712
ATOM   5862  O   HOH A1266      22.566  12.537  31.568
ATOM   5863  H1  HOH A1266      22.728  13.377  31.043
ATOM   5864  H2  HOH A1266      23.183  11.938  31.038
ATOM   5865  O   HOH A1267      15.166  15.581  39.439
ATOM   5866  H1  HOH A1267      15.611  15.377  40.281
ATOM   5867  H2  HOH A1267      16.008  15.639  38.855
ATOM   5868  O   HOH A1268      15.595   9.518  33.061
ATOM   5869  H1  HOH A1268      16.105   9.603  33.932
ATOM   5870  H2  HOH A1268      15.347   8.548  33.169
ATOM   5871  O   HOH A1269      11.210  13.016  24.871
ATOM   5872  H1  HOH A1269      10.981  13.965  25.216
ATOM   5873  H2  HOH A1269      11.640  13.362  24.019
ATOM   5874  O   HOH A1270      20.057  15.445  32.770
ATOM   5875  H1  HOH A1270      20.679  16.204  33.021
ATOM   5876  H2  HOH A1270      20.679  14.707  33.082
ATOM   5877  O   HOH A1271      19.651  12.858  34.918
ATOM   5878  H1  HOH A1271      19.048  12.896  34.095
ATOM   5879  H2  HOH A1271      20.485  13.174  34.425
ATOM   5880  O   HOH A1272      15.133  13.224  33.216
ATOM   5881  H1  HOH A1272      15.530  12.790  34.049
ATOM   5882  H2  HOH A1272      14.616  12.404  32.919
ATOM   5883  O   HOH A1273      17.995  13.102  28.140
ATOM   5884  H1  HOH A1273      17.296  12.836  28.844
ATOM   5885  H2  HOH A1273      17.580  14.016  27.967
ATOM   5886  O   HOH A1274      23.067  10.222  35.581
ATOM   5887  H1  HOH A1274      23.938  10.611  35.312
ATOM   5888  H2  HOH A1274      22.758  10.915  36.211
ATOM   5889  O   HOH A1275      16.784  15.208  27.576
ATOM   5890  H1  HOH A1275      16.013  14.807  27.047
ATOM   5891  H2  HOH A1275      17.246  15.620  26.768
ATOM   5892  O   HOH A1276      19.557  15.923  37.186
ATOM   5893  H1  HOH A1276      19.626  16.560  36.402
ATOM   5894  H2  HOH A1276      20.181  16.379  37.782
ATOM   5895  O   HOH A1277      13.871  11.210  32.412
ATOM   5896  H1  HOH A1277      14.496  10.452  32.661
ATOM   5897  H2  HOH A1277      13.920  11.078  31.418
ATOM   5898  O   HOH A1278      13.262  17.174  38.948
ATOM   5899  H1  HOH A1278      14.018  16.549  39.182
ATOM   5900  H2  HOH A1278      12.945  17.376  39.839
ATOM   5901  O   HOH A1279      15.100  18.370  29.320
ATOM   5902  H1  HOH A1279      14.500  17.621  29.002
ATOM   5903  H2  HOH A1279      15.944  17.801  29.359
ATOM   5904  O   HOH A1280      27.998  13.118  32.752
ATOM   5905  H1  HOH A1280      28.898  12.736  32.487
ATOM   5906  H2  HOH A1280      28.015  13.883  32.087
ATOM   5907  O   HOH A1281      20.587  10.534  27.956
ATOM   5908  H1  HOH A1281      21.101  10.902  27.152
ATOM   5909  H2  HOH A1281      20.495  11.443  28.410
ATOM   5910  O   HOH A1282      24.340  15.505  28.775
ATOM   5911  H1  HOH A1282      24.905  15.061  28.053
ATOM   5912  H2  HOH A1282      24.179  16.357  28.248
ATOM   5913  O   HOH A1283      14.716  18.841  32.760
ATOM   5914  H1  HOH A1283      15.137  17.915  32.806
ATOM   5915  H2  HOH A1283      14.939  19.093  33.715
ATOM   5916  O   HOH A1284      20.140  19.097  31.400
ATOM   5917  H1  HOH A1284      20.722  19.442  32.131
ATOM   5918  H2  HOH A1284      19.343  19.678  31.559
ATOM   5919  O   HOH A1285      25.856  14.538  27.022
ATOM   5920  H1  HOH A1285      26.644  13.930  26.776
ATOM   5921  H2  HOH A1285      26.440  15.389  27.012
ATOM   5922  O   HOH A1286      26.536  19.298  32.332
ATOM   5923  H1  HOH A1286      26.356  19.810  33.140
ATOM   5924  H2  HOH A1286      26.861  20.070  31.748
ATOM   5925  O   HOH A1287      24.701  23.821  32.449
ATOM   5926  H1  HOH A1287      25.316  23.587  31.681
ATOM   5927  H2  HOH A1287      25.361  24.203  33.051
ATOM   5928  O   HOH A1288      18.090  20.582  31.697
ATOM   5929  H1  HOH A1288      17.858  20.489  32.679
ATOM   5930  H2  HOH A1288      17.144  20.438  31.362
ATOM   5931  O   HOH A1289      10.717  15.293  25.650
ATOM   5932  H1  HOH A1289      10.225  15.379  26.542
ATOM   5933  H2  HOH A1289      10.264  16.101  25.231
ATOM   5934  O   HOH A1290      18.566  15.303  30.696
ATOM   5935  H1  HOH A1290      19.111  15.336  31.545
ATOM   5936  H2  HOH A1290      17.747  14.887  31.086
ATOM   5937  O   HOH A1291      12.482   7.062  32.685
ATOM   5938  H1  HOH A1291      12.254   7.721  33.414
ATOM   5939  H2  HOH A1291      13.480   7.054  32.884
ATOM   5940  O   HOH A1292      26.499  20.080  28.574
ATOM   5941  H1  HOH A1292      26.612  19.093  28.768
ATOM   5942  H2  HOH A1292      25.768  19.964  27.882
ATOM   5943  O   HOH A1293      11.781  22.829  27.588
ATOM   5944  H1  HOH A1293      11.162  23.626  27.475
ATOM   5945  H2  HOH A1293      12.610  23.285  27.242
ATOM   5946  O   HOH A1294      18.631  11.525  38.693
ATOM   5947  H1  HOH A1294      19.076  12.299  38.236
ATOM   5948  H2  HOH A1294      19.199  10.804  38.289
ATOM   5949  O   HOH A1295      26.722  17.640  29.198
ATOM   5950  H1  HOH A1295      25.884  17.652  29.780
ATOM   5951  H2  HOH A1295      27.356  17.510  29.978
ATOM   5952  O   HOH A1296      17.599  23.929  31.841
ATOM   5953  H1  HOH A1296      18.186  23.415  31.216
ATOM   5954  H2  HOH A1296      16.718  23.569  31.494
ATOM   5955  O   HOH A1297      13.615  16.477  28.402
ATOM   5956  H1  HOH A1297      12.654  16.821  28.485
ATOM   5957  H2  HOH A1297      13.551  16.256  27.426
ATOM   5958  O   HOH A1298      24.029  14.471  33.991
ATOM   5959  H1  HOH A1298      24.542  14.611  34.806
ATOM   5960  H2  HOH A1298      24.632  13.768  33.565
ATOM   5961  O   HOH A1299      27.607  10.425  29.702
ATOM   5962  H1  HOH A1299      26.937  11.131  29.404
ATOM   5963  H2  HOH A1299      26.966   9.961  30.335
ATOM   5964  O   HOH A1300      19.116  22.413  30.308
ATOM   5965  H1  HOH A1300      18.970  21.916  29.420
ATOM   5966  H2  HOH A1300      18.720  21.654  30.870
ATOM   5967  O   HOH A1301      16.298  12.538  29.851
ATOM   5968  H1  HOH A1301      16.272  13.336  30.458
ATOM   5969  H2  HOH A1301      16.645  11.881  30.554
ATOM   5970  O   HOH A1302      20.215  11.861  31.364
ATOM   5971  H1  HOH A1302      20.174  12.185  30.401
ATOM   5972  H2  HOH A1302      21.208  12.101  31.475
ATOM   5973  O   HOH A1303      17.187  22.984  34.204
ATOM   5974  H1  HOH A1303      18.081  23.076  34.645
ATOM   5975  H2  HOH A1303      17.430  23.404  33.326
ATOM   5976  O   HOH A1304      14.762   8.809  29.231
ATOM   5977  H1  HOH A1304      15.327   9.135  28.453
ATOM   5978  H2  HOH A1304      14.496   9.747  29.539
ATOM   5979  O   HOH A1305      23.583  16.322  32.323
ATOM   5980  H1  HOH A1305      23.195  15.715  31.613
ATOM   5981  H2  HOH A1305      23.807  15.587  32.980
ATOM   5982  O   HOH A1306      18.317  18.655  25.654
ATOM   5983  H1  HOH A1306      18.368  18.660  26.678
ATOM   5984  H2  HOH A1306      18.158  17.652  25.593
ATOM   5985  O   HOH A1307      13.213  15.792  25.878
ATOM   5986  H1  HOH A1307      12.225  15.561  25.845
ATOM   5987  H2  HOH A1307      13.231  16.189  24.942
ATOM   5988  O   HOH A1308      14.313  20.710  37.083
ATOM   5989  H1  HOH A1308      14.608  20.616  38.008
ATOM   5990  H2  HOH A1308      14.262  21.744  37.082
ATOM   5991  O   HOH A1309      11.381  19.279  30.162
ATOM   5992  H1  HOH A1309      10.451  19.682  30.080
ATOM   5993  H2  HOH A1309      11.869  20.113  29.830
ATOM   5994  O   HOH A1310      16.393  23.799  27.190
ATOM   5995  H1  HOH A1310      17.080  24.530  27.029
ATOM   5996  H2  HOH A1310      16.941  23.064  26.756
ATOM   5997  O   HOH A1311      26.168  23.287  30.415
ATOM   5998  H1  HOH A1311      25.406  23.128  29.754
ATOM   5999  H2  HOH A1311      26.733  23.824  29.752
ATOM   6000  O   HOH A1312      18.569  18.630  28.131
ATOM   6001  H1  HOH A1312      19.417  18.299  28.586
ATOM   6002  H2  HOH A1312      17.951  18.003  28.638
ATOM   6003  O   HOH A1313      20.588  17.796  29.401
ATOM   6004  H1  HOH A1313      20.357  18.307  30.285
ATOM   6005  H2  HOH A1313      21.556  18.139  29.417
ATOM   6006  O   HOH A1314      17.148  16.917  29.336
ATOM   6007  H1  HOH A1314      17.730  16.333  29.920
ATOM   6008  H2  HOH A1314      16.948  16.181  28.650
ATOM   6009  O   HOH A1315      20.496  15.807  26.493
ATOM   6010  H1  HOH A1315      21.024  14.992  26.165
ATOM   6011  H2  HOH A1315      20.527  15.565  27.462
ATOM   6012  O   HOH A1316      20.165   9.871  37.484
ATOM   6013  H1  HOH A1316      19.899  10.005  36.507
ATOM   6014  H2  HOH A1316      20.958  10.487  37.455
ATOM   6015  O   HOH A1317      14.967  14.039  26.298
ATOM   6016  H1  HOH A1317      14.209  13.361  26.429
ATOM   6017  H2  HOH A1317      14.326  14.798  26.053
ATOM   6018  O   HOH A1318      22.617   9.280  28.820
ATOM   6019  H1  HOH A1318      22.226   8.350  28.936
ATOM   6020  H2  HOH A1318      21.755   9.724  28.540
ATOM   6021  O   HOH A1319      13.888  10.158  26.020
ATOM   6022  H1  HOH A1319      14.239  10.406  25.104
ATOM   6023  H2  HOH A1319      14.757   9.902  26.428
ATOM   6024  O   HOH A1320      16.144   9.673  27.290
ATOM   6025  H1  HOH A1320      16.351  10.606  26.955
ATOM   6026  H2  HOH A1320      17.122   9.389  27.360
ATOM   6027  O   HOH A1321      20.331  25.155  34.405
ATOM   6028  H1  HOH A1321      19.828  25.519  33.610
ATOM   6029  H2  HOH A1321      20.959  25.879  34.537
ATOM   6030  O   HOH A1322      14.040  21.124  25.603
ATOM   6031  H1  HOH A1322      14.234  20.715  26.537
ATOM   6032  H2  HOH A1322      13.050  20.914  25.647
ATOM   6033  O   HOH A1323      12.134  21.119  33.960
ATOM   6034  H1  HOH A1323      12.111  20.279  33.392
ATOM   6035  H2  HOH A1323      12.175  20.633  34.849
ATOM   6036  O   HOH A1324      15.658  20.272  30.971
ATOM   6037  H1  HOH A1324      15.238  19.722  31.733
ATOM   6038  H2  HOH A1324      15.447  19.584  30.260
ATOM   6039  O   HOH A1325      28.230  21.227  27.201
ATOM   6040  H1  HOH A1325      27.496  20.811  27.770
ATOM   6041  H2  HOH A1325      27.624  21.450  26.417
ATOM   6042  O   HOH A1326      27.952  17.421  31.427
ATOM   6043  H1  HOH A1326      27.403  18.142  31.881
ATOM   6044  H2  HOH A1326      28.850  17.767  31.744
ATOM   6045  O   HOH A1327      12.088  15.436  32.058
ATOM   6046  H1  HOH A1327      12.716  15.309  32.845
ATOM   6047  H2  HOH A1327      12.794  15.265  31.351
ATOM   6048  O   HOH A1328      27.280  16.542  27.015
ATOM   6049  H1  HOH A1328      28.281  16.592  27.235
ATOM   6050  H2  HOH A1328      27.002  17.027  27.874
ATOM   6051  O   HOH A1329      25.815  12.012  28.955
ATOM   6052  H1  HOH A1329      24.982  11.598  29.375
ATOM   6053  H2  HOH A1329      25.782  12.848  29.541
ATOM   6054  O   HOH A1330      31.008  15.914  31.699
ATOM   6055  H1  HOH A1330      30.535  15.649  30.842
ATOM   6056  H2  HOH A1330      31.541  15.063  31.783
ATOM   6057  O   HOH A1331      17.122  15.720  37.924
ATOM   6058  H1  HOH A1331      18.108  15.806  37.733
ATOM   6059  H2  HOH A1331      16.898  15.269  37.035
ATOM   6060  O   HOH A1332      10.287  13.434  28.931
ATOM   6061  H1  HOH A1332      10.087  13.826  29.852
ATOM   6062  H2  HOH A1332       9.985  14.268  28.426
ATOM   6063  O   HOH A1333      27.853  14.958  31.041
ATOM   6064  H1  HOH A1333      28.654  15.010  30.411
ATOM   6065  H2  HOH A1333      27.873  15.953  31.274
ATOM   6066  O   HOH A1334      13.045  12.481  26.568
ATOM   6067  H1  HOH A1334      13.290  11.526  26.360
ATOM   6068  H2  HOH A1334      12.305  12.565  25.889
ATOM   6069  O   HOH A1335      11.738   8.962  26.496
ATOM   6070  H1  HOH A1335      11.959   8.749  27.468
ATOM   6071  H2  HOH A1335      12.608   9.453  26.309
ATOM   6072  O   HOH A1336      25.512  12.816  32.839
ATOM   6073  H1  HOH A1336      25.399  13.152  31.891
ATOM   6074  H2  HOH A1336      26.533  12.885  32.827
ATOM   6075  O   HOH A1337      14.949   7.054  33.317
ATOM   6076  H1  HOH A1337      15.410   6.708  34.144
ATOM   6077  H2  HOH A1337      15.280   6.357  32.683
ATOM   6078  O   HOH A1338      32.263  13.678  31.691
ATOM   6079  H1  HOH A1338      33.055  13.617  32.255
ATOM   6080  H2  HOH A1338      32.657  13.249  30.854
ATOM   6081  O   HOH A1339      28.052   9.222  27.508
ATOM   6082  H1  HOH A1339      27.933   9.599  28.443
ATOM   6083  H2  HOH A1339      27.445   9.898  27.062
ATOM   6084  O   HOH A1340      29.981  11.292  29.674
ATOM   6085  H1  HOH A1340      29.037  10.920  29.707
ATOM   6086  H2  HOH A1340      29.900  11.699  28.757
ATOM   6087  O   HOH A1341      13.590   8.404  38.307
ATOM   6088  H1  HOH A1341      12.590   8.507  38.529
ATOM   6089  H2  HOH A1341      13.557   9.060  37.528
ATOM   6090  O   HOH A1342      21.902  11.769  37.412
ATOM   6091  H1  HOH A1342      22.428  12.128  38.145
ATOM   6092  H2  HOH A1342      21.164  12.456  37.399
ATOM   6093  O   HOH A1343      14.195  23.171  37.106
ATOM   6094  H1  HOH A1343      13.979  24.049  37.457
ATOM   6095  H2  HOH A1343      14.472  23.472  36.161
ATOM   6096  O   HOH A1344      19.302   7.620  38.085
ATOM   6097  H1  HOH A1344      19.727   8.535  37.918
ATOM   6098  H2  HOH A1344      20.038   7.094  37.636
ATOM   6099  O   HOH A1345      22.457   7.849  35.228
ATOM   6100  H1  HOH A1345      22.686   8.840  35.387
ATOM   6101  H2  HOH A1345      23.426   7.549  35.186
ATOM   6102  O   HOH A1346      25.749   9.337  31.120
ATOM   6103  H1  HOH A1346      25.501   8.372  30.885
ATOM   6104  H2  HOH A1346      25.906   9.140  32.104
ATOM   6105  O   HOH A1347      11.820  22.918  31.185
ATOM   6106  H1  HOH A1347      10.818  22.738  31.164
ATOM   6107  H2  HOH A1347      11.730  23.822  30.683
ATOM   6108  O   HOH A1348      10.339   9.355  30.230
ATOM   6109  H1  HOH A1348      10.080  10.069  29.561
ATOM   6110  H2  HOH A1348      11.176   9.064  29.750
ATOM   6111  O   HOH A1349      18.354  12.708  32.793
ATOM   6112  H1  HOH A1349      17.720  12.032  32.393
ATOM   6113  H2  HOH A1349      19.135  12.455  32.188
ATOM   6114  O   HOH A1350      21.231   7.525  33.037
ATOM   6115  H1  HOH A1350      21.695   7.663  33.929
ATOM   6116  H2  HOH A1350      20.853   8.459  32.974
ATOM   6117  O   HOH A1351      25.574   6.629  28.189
ATOM   6118  H1  HOH A1351      25.054   7.450  27.874
ATOM   6119  H2  HOH A1351      25.391   6.785  29.179
ATOM   6120  O   HOH A1352      12.555  21.330  29.419
ATOM   6121  H1  HOH A1352      12.201  21.949  28.684
ATOM   6122  H2  HOH A1352      12.344  21.986  30.175
ATOM   6123  O   HOH A1353      12.285   8.374  28.867
ATOM   6124  H1  HOH A1353      12.128   7.505  29.366
ATOM   6125  H2  HOH A1353      13.271   8.436  29.064
ATOM   6126  O   HOH A1354      17.065  10.902  31.543
ATOM   6127  H1  HOH A1354      16.470  10.317  32.125
ATOM   6128  H2  HOH A1354      17.688  10.154  31.267
ATOM   6129  O   HOH A1355      28.110  26.977  28.284
ATOM   6130  H1  HOH A1355      28.873  27.387  28.726
ATOM   6131  H2  HOH A1355      28.297  27.334  27.338
ATOM   6132  O   HOH A1356      14.979  24.512  29.225
ATOM   6133  H1  HOH A1356      15.159  23.810  29.923
ATOM   6134  H2  HOH A1356      15.603  24.170  28.527
ATOM   6135  O   HOH A1357      14.295  20.282  27.880
ATOM   6136  H1  HOH A1357      13.669  20.664  28.568
ATOM   6137  H2  HOH A1357      14.624  19.509  28.432
ATOM   6138  O   HOH A1358      19.015  15.044  18.132
ATOM   6139  H1  HOH A1358      18.777  14.591  17.267
ATOM   6140  H2  HOH A1358      19.480  14.248  18.553
ATOM   6141  O   HOH A1359      15.751  17.519  18.686
ATOM   6142  H1  HOH A1359      14.784  17.340  18.395
ATOM   6143  H2  HOH A1359      15.485  18.189  19.400
ATOM   6144  O   HOH A1360      23.180  23.623  17.106
ATOM   6145  H1  HOH A1360      23.352  22.737  16.656
ATOM   6146  H2  HOH A1360      24.135  23.963  17.020
ATOM   6147  O   HOH A1361      14.022  21.976  17.299
ATOM   6148  H1  HOH A1361      14.492  21.682  16.448
ATOM   6149  H2  HOH A1361      13.623  21.074  17.511
ATOM   6150  O   HOH A1362       7.917  14.742  15.323
ATOM   6151  H1  HOH A1362       8.398  15.588  15.193
ATOM   6152  H2  HOH A1362       7.985  14.332  14.453
ATOM   6153  O   HOH A1363      19.130  23.194  16.778
ATOM   6154  H1  HOH A1363      18.554  23.487  16.020
ATOM   6155  H2  HOH A1363      19.953  23.730  16.499
ATOM   6156  O   HOH A1364      20.838  19.414  18.292
ATOM   6157  H1  HOH A1364      20.762  18.397  18.191
ATOM   6158  H2  HOH A1364      20.754  19.382  19.314
ATOM   6159  O   HOH A1365      18.276  13.926  15.937
ATOM   6160  H1  HOH A1365      17.894  13.038  16.236
ATOM   6161  H2  HOH A1365      18.226  13.735  14.947
ATOM   6162  O   HOH A1366      18.482  11.406  18.808
ATOM   6163  H1  HOH A1366      17.897  10.913  19.434
ATOM   6164  H2  HOH A1366      17.881  11.457  18.020
ATOM   6165  O   HOH A1367      26.047  11.629  21.803
ATOM   6166  H1  HOH A1367      26.815  12.192  22.123
ATOM   6167  H2  HOH A1367      25.379  12.364  21.694
ATOM   6168  O   HOH A1368      19.602  19.988  14.453
ATOM   6169  H1  HOH A1368      19.070  19.550  13.699
ATOM   6170  H2  HOH A1368      18.787  20.167  15.033
ATOM   6171  O   HOH A1369      15.076  19.111  20.552
ATOM   6172  H1  HOH A1369      14.501  19.845  20.922
ATOM   6173  H2  HOH A1369      15.909  19.677  20.431
ATOM   6174  O   HOH A1370      26.237  13.117  16.191
ATOM   6175  H1  HOH A1370      26.899  12.490  16.606
ATOM   6176  H2  HOH A1370      25.433  12.480  16.352
ATOM   6177  O   HOH A1371      14.846  11.063  20.593
ATOM   6178  H1  HOH A1371      14.588  11.812  21.222
ATOM   6179  H2  HOH A1371      14.024  11.170  19.995
ATOM   6180  O   HOH A1372      15.390  21.728  23.626
ATOM   6181  H1  HOH A1372      16.206  21.155  23.829
ATOM   6182  H2  HOH A1372      14.858  21.411  24.443
ATOM   6183  O   HOH A1373       9.698  20.923   9.899
ATOM   6184  H1  HOH A1373       8.810  21.342   9.956
ATOM   6185  H2  HOH A1373      10.182  21.421  10.599
ATOM   6186  O   HOH A1374      24.357  18.905  20.066
ATOM   6187  H1  HOH A1374      24.028  19.618  19.440
ATOM   6188  H2  HOH A1374      25.267  19.296  20.241
ATOM   6189  O   HOH A1375      27.410  11.078  17.480
ATOM   6190  H1  HOH A1375      27.102  10.816  18.411
ATOM   6191  H2  HOH A1375      26.831  10.370  17.011
ATOM   6192  O   HOH A1376      23.154  20.609  18.601
ATOM   6193  H1  HOH A1376      22.870  21.486  19.019
ATOM   6194  H2  HOH A1376      22.242  20.217  18.507
ATOM   6195  O   HOH A1377      23.561  21.261  16.137
ATOM   6196  H1  HOH A1377      23.598  20.954  17.099
ATOM   6197  H2  HOH A1377      22.831  20.607  15.864
ATOM   6198  O   HOH A1378      21.485  16.850  20.630
ATOM   6199  H1  HOH A1378      21.083  16.824  19.700
ATOM   6200  H2  HOH A1378      21.190  17.794  20.834
ATOM   6201  O   HOH A1379      17.958  13.294  13.416
ATOM   6202  H1  HOH A1379      17.183  12.697  13.366
ATOM   6203  H2  HOH A1379      17.574  14.111  13.018
ATOM   6204  O   HOH A1380      23.808  16.507  19.622
ATOM   6205  H1  HOH A1380      22.914  16.617  20.076
ATOM   6206  H2  HOH A1380      24.093  17.480  19.751
ATOM   6207  O   HOH A1381      24.050  15.873  15.323
ATOM   6208  H1  HOH A1381      23.344  16.494  14.943
ATOM   6209  H2  HOH A1381      23.564  15.721  16.208
ATOM   6210  O   HOH A1382      22.651  11.160  20.960
ATOM   6211  H1  HOH A1382      22.603  10.420  21.627
ATOM   6212  H2  HOH A1382      21.743  11.571  21.190
ATOM   6213  O   HOH A1383      16.502  15.815  15.669
ATOM   6214  H1  HOH A1383      15.770  15.262  16.012
ATOM   6215  H2  HOH A1383      17.267  15.219  15.799
ATOM   6216  O   HOH A1384      17.141  20.523  20.268
ATOM   6217  H1  HOH A1384      17.660  20.725  19.436
ATOM   6218  H2  HOH A1384      16.671  21.407  20.345
ATOM   6219  O   HOH A1385      13.271  14.185  18.790
ATOM   6220  H1  HOH A1385      13.960  14.189  18.099
ATOM   6221  H2  HOH A1385      13.753  14.549  19.562
ATOM   6222  O   HOH A1386      26.573  24.207  22.467
ATOM   6223  H1  HOH A1386      26.298  23.453  21.867
ATOM   6224  H2  HOH A1386      25.956  24.904  22.076
ATOM   6225  O   HOH A1387      17.445  20.409  24.171
ATOM   6226  H1  HOH A1387      17.931  20.073  23.348
ATOM   6227  H2  HOH A1387      17.736  19.620  24.762
ATOM   6228  O   HOH A1388      20.969  16.447  12.681
ATOM   6229  H1  HOH A1388      21.775  16.396  12.042
ATOM   6230  H2  HOH A1388      21.505  16.907  13.423
ATOM   6231  O   HOH A1389      17.233  15.799  19.850
ATOM   6232  H1  HOH A1389      17.917  15.537  19.163
ATOM   6233  H2  HOH A1389      16.730  16.458  19.276
ATOM   6234  O   HOH A1390      18.646  20.952  18.105
ATOM   6235  H1  HOH A1390      19.497  20.447  18.168
ATOM   6236  H2  HOH A1390      18.989  21.779  17.673
ATOM   6237  O   HOH A1391      17.852  22.127  25.976
ATOM   6238  H1  HOH A1391      18.289  22.703  25.263
ATOM   6239  H2  HOH A1391      17.614  21.380  25.321
ATOM   6240  O   HOH A1392      12.743  15.791  11.852
ATOM   6241  H1  HOH A1392      12.429  16.179  12.696
ATOM   6242  H2  HOH A1392      12.034  16.048  11.236
ATOM   6243  O   HOH A1393      29.405  23.451  27.479
ATOM   6244  H1  HOH A1393      28.993  22.537  27.381
ATOM   6245  H2  HOH A1393      30.101  23.355  26.775
ATOM   6246  O   HOH A1394      10.851  14.253  17.548
ATOM   6247  H1  HOH A1394      10.621  13.304  17.509
ATOM   6248  H2  HOH A1394      11.633  14.255  18.137
ATOM   6249  O   HOH A1395      12.427  19.110  15.081
ATOM   6250  H1  HOH A1395      12.067  20.020  15.004
ATOM   6251  H2  HOH A1395      13.296  19.189  14.626
ATOM   6252  O   HOH A1396      25.428  19.896  24.264
ATOM   6253  H1  HOH A1396      24.737  19.622  23.569
ATOM   6254  H2  HOH A1396      26.210  19.456  23.791
ATOM   6255  O   HOH A1397      20.752  21.791  24.251
ATOM   6256  H1  HOH A1397      21.305  22.537  24.679
ATOM   6257  H2  HOH A1397      19.943  22.366  24.076
ATOM   6258  O   HOH A1398      21.684  24.305  13.676
ATOM   6259  H1  HOH A1398      21.433  24.351  14.658
ATOM   6260  H2  HOH A1398      21.270  23.393  13.515
ATOM   6261  O   HOH A1399      15.208  23.623  14.311
ATOM   6262  H1  HOH A1399      15.282  22.662  14.671
ATOM   6263  H2  HOH A1399      14.186  23.626  14.350
ATOM   6264  O   HOH A1400      20.602  22.043  13.285
ATOM   6265  H1  HOH A1400      20.366  21.174  13.727
ATOM   6266  H2  HOH A1400      21.169  21.665  12.546
ATOM   6267  O   HOH A1401      21.115  24.564  16.103
ATOM   6268  H1  HOH A1401      21.961  24.224  16.562
ATOM   6269  H2  HOH A1401      21.376  25.546  16.147
ATOM   6270  O   HOH A1402      25.525  15.603  23.535
ATOM   6271  H1  HOH A1402      24.686  16.181  23.522
ATOM   6272  H2  HOH A1402      25.588  15.494  22.535
ATOM   6273  O   HOH A1403      12.929  19.669  17.598
ATOM   6274  H1  HOH A1403      13.149  18.730  17.926
ATOM   6275  H2  HOH A1403      12.822  19.390  16.625
ATOM   6276  O   HOH A1404      17.097  13.185  22.438
ATOM   6277  H1  HOH A1404      17.339  12.564  21.734
ATOM   6278  H2  HOH A1404      16.124  13.075  22.466
ATOM   6279  O   HOH A1405      24.966   9.825  23.221
ATOM   6280  H1  HOH A1405      25.646   9.100  23.051
ATOM   6281  H2  HOH A1405      25.420  10.532  22.653
ATOM   6282  O   HOH A1406      21.803  13.864  25.666
ATOM   6283  H1  HOH A1406      21.848  12.872  25.878
ATOM   6284  H2  HOH A1406      22.812  13.952  25.482
ATOM   6285  O   HOH A1407      12.663  15.553  16.069
ATOM   6286  H1  HOH A1407      12.337  15.985  15.249
ATOM   6287  H2  HOH A1407      11.857  15.127  16.424
ATOM   6288  O   HOH A1408      18.134  16.142  25.679
ATOM   6289  H1  HOH A1408      18.221  15.686  24.773
ATOM   6290  H2  HOH A1408      19.098  15.983  25.959
ATOM   6291  O   HOH A1409      12.825  11.616  19.083
ATOM   6292  H1  HOH A1409      11.983  11.481  18.611
ATOM   6293  H2  HOH A1409      12.938  12.586  19.036
ATOM   6294  O   HOH A1410      16.616  11.971  26.312
ATOM   6295  H1  HOH A1410      16.017  12.767  26.219
ATOM   6296  H2  HOH A1410      17.273  12.391  26.951
ATOM   6297  O   HOH A1411      22.563  13.329  18.554
ATOM   6298  H1  HOH A1411      22.777  12.360  18.484
ATOM   6299  H2  HOH A1411      21.596  13.222  18.833
ATOM   6300  O   HOH A1412      17.144  11.587  16.556
ATOM   6301  H1  HOH A1412      17.427  10.742  16.146
ATOM   6302  H2  HOH A1412      16.215  11.651  16.262
ATOM   6303  O   HOH A1413      20.170  13.086  19.232
ATOM   6304  H1  HOH A1413      20.291  12.778  20.198
ATOM   6305  H2  HOH A1413      19.470  12.341  19.029
ATOM   6306  O   HOH A1414      16.481  15.083  12.134
ATOM   6307  H1  HOH A1414      15.614  14.796  11.777
ATOM   6308  H2  HOH A1414      16.956  15.401  11.325
ATOM   6309  O   HOH A1415      26.671   7.923  22.785
ATOM   6310  H1  HOH A1415      26.995   7.319  23.526
ATOM   6311  H2  HOH A1415      26.427   7.201  22.140
ATOM   6312  O   HOH A1416      13.913  21.229  21.611
ATOM   6313  H1  HOH A1416      14.533  21.828  21.054
ATOM   6314  H2  HOH A1416      14.434  21.385  22.474
ATOM   6315  O   HOH A1417      17.619  17.053  22.009
ATOM   6316  H1  HOH A1417      17.980  16.307  22.580
ATOM   6317  H2  HOH A1417      17.569  16.519  21.150
ATOM   6318  O   HOH A1418      15.013  14.823  20.740
ATOM   6319  H1  HOH A1418      14.881  15.707  21.218
ATOM   6320  H2  HOH A1418      15.939  15.040  20.398
ATOM   6321  O   HOH A1419      14.725  19.344  13.879
ATOM   6322  H1  HOH A1419      14.146  19.143  13.048
ATOM   6323  H2  HOH A1419      15.349  18.563  13.740
ATOM   6324  O   HOH A1420      20.740  16.883  18.204
ATOM   6325  H1  HOH A1420      20.011  16.188  18.101
ATOM   6326  H2  HOH A1420      21.474  16.343  17.783
ATOM   6327  O   HOH A1421      22.138  17.579  25.615
ATOM   6328  H1  HOH A1421      21.425  16.938  25.926
ATOM   6329  H2  HOH A1421      21.550  18.405  25.614
ATOM   6330  O   HOH A1422      22.848  16.348  11.087
ATOM   6331  H1  HOH A1422      23.067  17.244  10.616
ATOM   6332  H2  HOH A1422      23.824  16.035  11.061
ATOM   6333  O   HOH A1423      17.140  18.094  16.712
ATOM   6334  H1  HOH A1423      16.999  17.197  16.267
ATOM   6335  H2  HOH A1423      16.596  17.876  17.543
ATOM   6336  O   HOH A1424      18.166  19.058  12.639
ATOM   6337  H1  HOH A1424      17.591  19.779  12.245
ATOM   6338  H2  HOH A1424      17.426  18.489  13.011
ATOM   6339  O   HOH A1425      12.110  16.585  20.189
ATOM   6340  H1  HOH A1425      11.921  17.180  20.963
ATOM   6341  H2  HOH A1425      11.545  15.806  20.483
ATOM   6342  O   HOH A1426      15.013  17.057  22.007
ATOM   6343  H1  HOH A1426      16.002  17.110  22.180
ATOM   6344  H2  HOH A1426      14.972  17.888  21.421
ATOM   6345  O   HOH A1427      21.295  21.020  27.626
ATOM   6346  H1  HOH A1427      21.091  20.390  26.849
ATOM   6347  H2  HOH A1427      20.323  21.160  27.878
ATOM   6348  O   HOH A1428      26.799  17.800  13.242
ATOM   6349  H1  HOH A1428      27.028  17.292  12.396
ATOM   6350  H2  HOH A1428      27.497  18.524  13.111
ATOM   6351  O   HOH A1429      23.773  19.172  22.525
ATOM   6352  H1  HOH A1429      23.037  19.859  22.412
ATOM   6353  H2  HOH A1429      23.959  19.054  21.539
ATOM   6354  O   HOH A1430      25.304  21.860  14.374
ATOM   6355  H1  HOH A1430      24.622  21.572  15.063
ATOM   6356  H2  HOH A1430      24.840  21.431  13.580
ATOM   6357  O   HOH A1431      21.688  19.593  15.777
ATOM   6358  H1  HOH A1431      20.820  19.741  15.268
ATOM   6359  H2  HOH A1431      21.285  19.515  16.683
ATOM   6360  O   HOH A1432      17.555  20.345  15.920
ATOM   6361  H1  HOH A1432      17.919  20.611  16.830
ATOM   6362  H2  HOH A1432      17.363  19.363  16.224
ATOM   6363  O   HOH A1433       8.066  17.100   8.015
ATOM   6364  H1  HOH A1433       8.155  16.812   8.946
ATOM   6365  H2  HOH A1433       7.957  16.241   7.575
ATOM   6366  O   HOH A1434      15.650  12.122  12.681
ATOM   6367  H1  HOH A1434      15.417  11.346  12.123
ATOM   6368  H2  HOH A1434      15.052  12.808  12.293
ATOM   6369  O   HOH A1435      20.952  26.934  21.097
ATOM   6370  H1  HOH A1435      21.458  27.615  21.639
ATOM   6371  H2  HOH A1435      20.090  27.414  21.043
ATOM   6372  O   HOH A1436      20.710  19.294  20.798
ATOM   6373  H1  HOH A1436      19.856  19.364  21.340
ATOM   6374  H2  HOH A1436      21.226  19.970  21.362
ATOM   6375  O   HOH A1437      22.014  21.379  11.289
ATOM   6376  H1  HOH A1437      21.974  22.075  10.574
ATOM   6377  H2  HOH A1437      21.627  20.621  10.732
ATOM   6378  O   HOH A1438      23.427  21.925  26.660
ATOM   6379  H1  HOH A1438      23.013  22.607  26.039
ATOM   6380  H2  HOH A1438      22.543  21.583  27.027
ATOM   6381  O   HOH A1439      12.356  24.482   9.828
ATOM   6382  H1  HOH A1439      12.090  24.647  10.798
ATOM   6383  H2  HOH A1439      12.689  23.531  10.012
ATOM   6384  O   HOH A1440      10.550  11.507  17.648
ATOM   6385  H1  HOH A1440       9.828  11.608  18.294
ATOM   6386  H2  HOH A1440      10.375  10.653  17.228
ATOM   6387  O   HOH A1441      22.405  17.540  14.389
ATOM   6388  H1  HOH A1441      22.177  18.349  14.940
ATOM   6389  H2  HOH A1441      23.208  17.988  13.908
ATOM   6390  O   HOH A1442      10.398  21.917  24.027
ATOM   6391  H1  HOH A1442      10.832  21.880  23.107
ATOM   6392  H2  HOH A1442      10.060  22.869  23.931
ATOM   6393  O   HOH A1443      18.821  21.193  28.159
ATOM   6394  H1  HOH A1443      18.573  20.223  28.109
ATOM   6395  H2  HOH A1443      18.373  21.490  27.311
ATOM   6396  O   HOH A1444      15.476  22.953  10.782
ATOM   6397  H1  HOH A1444      15.549  23.241   9.812
ATOM   6398  H2  HOH A1444      14.511  22.638  10.715
ATOM   6399  O   HOH A1445      13.171  18.873  11.909
ATOM   6400  H1  HOH A1445      12.206  18.902  11.759
ATOM   6401  H2  HOH A1445      13.474  18.316  11.162
ATOM   6402  O   HOH A1446      20.487  12.190  21.556
ATOM   6403  H1  HOH A1446      20.498  12.829  22.350
ATOM   6404  H2  HOH A1446      19.789  11.564  21.966
ATOM   6405  O   HOH A1447      16.997  21.063  11.499
ATOM   6406  H1  HOH A1447      16.940  20.635  10.578
ATOM   6407  H2  HOH A1447      16.346  21.814  11.278
ATOM   6408  O   HOH A1448      14.733  14.032  16.510
ATOM   6409  H1  HOH A1448      14.572  13.189  16.058
ATOM   6410  H2  HOH A1448      13.957  14.580  16.245
ATOM   6411  O   HOH A1449      18.403  15.046  23.447
ATOM   6412  H1  HOH A1449      19.284  14.533  23.420
ATOM   6413  H2  HOH A1449      17.851  14.274  23.060
ATOM   6414  O   HOH A1450      17.600  24.269  14.816
ATOM   6415  H1  HOH A1450      17.911  23.731  13.999
ATOM   6416  H2  HOH A1450      16.614  24.041  14.674
ATOM   6417  O   HOH A1451      23.027  10.759  18.517
ATOM   6418  H1  HOH A1451      22.920  10.848  19.524
ATOM   6419  H2  HOH A1451      22.603   9.846  18.449
ATOM   6420  O   HOH A1452      22.852  15.525  17.501
ATOM   6421  H1  HOH A1452      22.766  14.579  17.912
ATOM   6422  H2  HOH A1452      23.345  15.901  18.307
ATOM   6423  O   HOH A1453      13.808  17.688   9.633
ATOM   6424  H1  HOH A1453      14.735  17.606   9.322
ATOM   6425  H2  HOH A1453      13.424  16.834   9.338
ATOM   6426  O   HOH A1454      10.787  16.482  10.130
ATOM   6427  H1  HOH A1454       9.845  16.200  10.154
ATOM   6428  H2  HOH A1454      10.738  17.387  10.507
ATOM   6429  O   HOH A1455      25.948  22.196  21.004
ATOM   6430  H1  HOH A1455      26.733  22.480  20.411
ATOM   6431  H2  HOH A1455      26.192  21.207  20.978
ATOM   6432  O   HOH A1456      12.486  23.805  18.292
ATOM   6433  H1  HOH A1456      12.449  24.375  17.456
ATOM   6434  H2  HOH A1456      13.033  23.060  17.898
ATOM   6435  O   HOH A1457      10.538  18.836  11.307
ATOM   6436  H1  HOH A1457       9.859  18.817  12.014
ATOM   6437  H2  HOH A1457      10.226  19.571  10.740
ATOM   6438  O   HOH A1458      13.965  23.564  26.483
ATOM   6439  H1  HOH A1458      14.914  23.649  26.823
ATOM   6440  H2  HOH A1458      14.061  22.635  26.114
ATOM   6441  O   HOH A1459      15.621  23.758   8.382
ATOM   6442  H1  HOH A1459      16.564  23.924   8.036
ATOM   6443  H2  HOH A1459      15.285  23.328   7.528
ATOM   6444  O   HOH A1460      22.597  21.134  29.712
ATOM   6445  H1  HOH A1460      22.024  21.080  28.859
ATOM   6446  H2  HOH A1460      22.752  20.127  29.749
ATOM   6447  O   HOH A1461      22.128  23.616  25.253
ATOM   6448  H1  HOH A1461      22.568  24.170  24.549
ATOM   6449  H2  HOH A1461      21.936  24.361  25.904
ATOM   6450  O   HOH A1462      24.263  20.863  12.310
ATOM   6451  H1  HOH A1462      23.329  21.041  11.949
ATOM   6452  H2  HOH A1462      24.741  21.258  11.503
ATOM   6453  O   HOH A1463      11.522  18.235  22.168
ATOM   6454  H1  HOH A1463      11.311  18.852  21.389
ATOM   6455  H2  HOH A1463      10.856  18.681  22.797
ATOM   6456  O   HOH A1464      16.230  17.426   8.695
ATOM   6457  H1  HOH A1464      16.846  16.864   9.210
ATOM   6458  H2  HOH A1464      16.044  16.868   7.911
ATOM   6459  O   HOH A1465      20.689  19.650  25.620
ATOM   6460  H1  HOH A1465      20.659  20.436  24.989
ATOM   6461  H2  HOH A1465      19.751  19.337  25.482
ATOM   6462  O   HOH A1466      19.590  17.780  11.042
ATOM   6463  H1  HOH A1466      19.054  18.312  11.727
ATOM   6464  H2  HOH A1466      20.106  17.239  11.729
ATOM   6465  O   HOH A1467      24.788  19.811  26.704
ATOM   6466  H1  HOH A1467      25.037  19.803  25.720
ATOM   6467  H2  HOH A1467      24.247  20.672  26.653
ATOM   6468  O   HOH A1468      13.014  16.583  23.449
ATOM   6469  H1  HOH A1468      12.429  17.283  23.015
ATOM   6470  H2  HOH A1468      13.847  16.801  22.905
ATOM   6471  O   HOH A1469      16.338  17.337  13.501
ATOM   6472  H1  HOH A1469      16.380  16.873  14.364
ATOM   6473  H2  HOH A1469      16.314  16.576  12.884
ATOM   6474  O   HOH A1470      14.305  12.932  22.184
ATOM   6475  H1  HOH A1470      13.449  13.389  22.512
ATOM   6476  H2  HOH A1470      14.573  13.725  21.586
ATOM   6477  O   HOH A1471      17.887  15.989  10.173
ATOM   6478  H1  HOH A1471      18.416  15.748   9.373
ATOM   6479  H2  HOH A1471      18.465  16.695  10.539
ATOM   6480  O   HOH A1472      23.849  17.630  27.469
ATOM   6481  H1  HOH A1472      24.281  18.492  27.129
ATOM   6482  H2  HOH A1472      23.186  17.563  26.700
ATOM   6483  O   HOH A1473      24.223  14.106  25.174
ATOM   6484  H1  HOH A1473      24.858  14.242  25.950
ATOM   6485  H2  HOH A1473      24.767  14.611  24.499
ATOM   6486  O   HOH A1474      14.646  10.863  23.732
ATOM   6487  H1  HOH A1474      14.395  11.614  23.130
ATOM   6488  H2  HOH A1474      14.430  10.104  23.110
ATOM   6489  O   HOH A1475      17.159  10.241  20.715
ATOM   6490  H1  HOH A1475      16.950   9.291  20.621
ATOM   6491  H2  HOH A1475      16.180  10.576  20.665
ATOM   6492  O   HOH A1476      18.518  19.416  22.066
ATOM   6493  H1  HOH A1476      18.126  18.484  22.018
ATOM   6494  H2  HOH A1476      17.933  19.823  21.348
ATOM   6495  O   HOH A1477      20.592  13.833  23.439
ATOM   6496  H1  HOH A1477      21.052  13.838  24.340
ATOM   6497  H2  HOH A1477      21.332  14.361  22.963
ATOM   6498  O   HOH A1478      22.344  15.100  22.234
ATOM   6499  H1  HOH A1478      22.793  15.829  22.792
ATOM   6500  H2  HOH A1478      21.936  15.757  21.569
ATOM   6501  O   HOH A1479      18.546  23.998  21.452
ATOM   6502  H1  HOH A1479      18.451  23.794  20.446
ATOM   6503  H2  HOH A1479      17.622  24.432  21.506
ATOM   6504  O   HOH A1480      17.040  10.529  24.277
ATOM   6505  H1  HOH A1480      17.017  11.124  25.099
ATOM   6506  H2  HOH A1480      16.064  10.723  24.022
ATOM   6507  O   HOH A1481      21.879  11.362  25.983
ATOM   6508  H1  HOH A1481      21.427  10.831  25.246
ATOM   6509  H2  HOH A1481      22.813  11.028  25.800
ATOM   6510  O   HOH A1482      18.753  23.373  23.925
ATOM   6511  H1  HOH A1482      19.054  24.339  24.112
ATOM   6512  H2  HOH A1482      18.698  23.508  22.919
ATOM   6513  O   HOH A1483      18.319  22.959  12.805
ATOM   6514  H1  HOH A1483      19.227  22.552  12.995
ATOM   6515  H2  HOH A1483      17.891  22.139  12.432
ATOM   6516  O   HOH A1484      10.424  17.688   6.752
ATOM   6517  H1  HOH A1484      10.597  18.564   7.158
ATOM   6518  H2  HOH A1484       9.624  17.404   7.237
ATOM   6519  O   HOH A1485      10.629  20.611  17.815
ATOM   6520  H1  HOH A1485      10.202  19.790  17.368
ATOM   6521  H2  HOH A1485      11.577  20.245  17.773
ATOM   6522  O   HOH A1486      15.356  21.328  15.248
ATOM   6523  H1  HOH A1486      16.276  20.955  15.498
ATOM   6524  H2  HOH A1486      15.117  20.529  14.650
ATOM   6525  O   HOH A1487       8.596  21.995  18.275
ATOM   6526  H1  HOH A1487       9.437  21.461  18.061
ATOM   6527  H2  HOH A1487       9.093  22.861  18.469
ATOM   6528  O   HOH A1488      25.495  23.937  24.721
ATOM   6529  H1  HOH A1488      26.016  24.069  23.856
ATOM   6530  H2  HOH A1488      24.618  24.241  24.359
ATOM   6531  O   HOH A1489      27.504  20.884  10.834
ATOM   6532  H1  HOH A1489      26.620  21.370  10.684
ATOM   6533  H2  HOH A1489      28.032  21.474  10.194
ATOM   6534  O   HOH A1490      24.344  18.513  13.271
ATOM   6535  H1  HOH A1490      25.311  18.274  13.202
ATOM   6536  H2  HOH A1490      24.388  19.406  12.822
ATOM   6537  O   HOH A1491       9.139  17.040  14.728
ATOM   6538  H1  HOH A1491       8.816  17.689  14.061
ATOM   6539  H2  HOH A1491       9.309  17.613  15.500
ATOM   6540  O   HOH A1492      28.151  18.557  16.824
ATOM   6541  H1  HOH A1492      28.866  18.017  16.341
ATOM   6542  H2  HOH A1492      27.373  18.069  16.416
ATOM   6543  O   HOH A1493      21.983  20.902  22.249
ATOM   6544  H1  HOH A1493      21.468  21.266  23.044
ATOM   6545  H2  HOH A1493      22.576  21.709  22.130
ATOM   6546  O   HOH A1494      27.944  18.719   9.655
ATOM   6547  H1  HOH A1494      28.940  18.900   9.794
ATOM   6548  H2  HOH A1494      27.652  19.575  10.130
ATOM   6549  O   HOH A1495      26.344  17.019  15.604
ATOM   6550  H1  HOH A1495      26.526  17.293  14.646
ATOM   6551  H2  HOH A1495      25.421  16.654  15.439
ATOM   6552  O   HOH A1496      13.351  17.253  18.144
ATOM   6553  H1  HOH A1496      12.805  16.920  18.937
ATOM   6554  H2  HOH A1496      13.069  16.575  17.487
ATOM   6555  O   HOH A1497      23.421  16.931  23.533
ATOM   6556  H1  HOH A1497      23.530  17.870  23.155
ATOM   6557  H2  HOH A1497      22.919  17.216  24.365
ATOM   6558  O   HOH A1498      12.257  14.207  22.882
ATOM   6559  H1  HOH A1498      11.581  14.430  22.163
ATOM   6560  H2  HOH A1498      12.502  15.162  23.104
ATOM   6561  O   HOH A1499      24.270  10.504  25.599
ATOM   6562  H1  HOH A1499      25.159  10.833  25.939
ATOM   6563  H2  HOH A1499      24.577  10.280  24.667
ATOM   6564  O   HOH A1500      24.065  13.292  21.452
ATOM   6565  H1  HOH A1500      23.486  12.525  21.173
ATOM   6566  H2  HOH A1500      23.329  13.891  21.783
ATOM   6567  O   HOH A1501      25.547  15.245  21.001
ATOM   6568  H1  HOH A1501      24.963  14.415  21.081
ATOM   6569  H2  HOH A1501      24.916  15.742  20.385
ATOM   6570  O   HOH A1502      25.081  13.975  14.068
ATOM   6571  H1  HOH A1502      24.667  14.764  14.554
ATOM   6572  H2  HOH A1502      25.588  13.619  14.861
ATOM   6573  O   HOH A1503      29.750  11.773  17.116
ATOM   6574  H1  HOH A1503      28.776  11.474  17.244
ATOM   6575  H2  HOH A1503      29.616  12.067  16.153
ATOM   6576  O   HOH A1504      24.528  11.404  16.593
ATOM   6577  H1  HOH A1504      23.949  11.105  17.358
ATOM   6578  H2  HOH A1504      25.040  10.536  16.485
ATOM   6579  O   HOH A1505      26.149  10.046   9.359
ATOM   6580  H1  HOH A1505      27.058   9.633   9.598
ATOM   6581  H2  HOH A1505      26.436  11.000   9.521
ATOM   6582  O   HOH A1506      25.559  24.392  16.733
ATOM   6583  H1  HOH A1506      25.736  24.381  15.737
ATOM   6584  H2  HOH A1506      26.383  23.814  16.968
ATOM   6585  O   HOH A1507      16.019  24.144  23.918
ATOM   6586  H1  HOH A1507      16.965  23.938  24.102
ATOM   6587  H2  HOH A1507      15.713  23.180  23.780
ATOM   6588  O   HOH A1508      15.641  22.612  20.477
ATOM   6589  H1  HOH A1508      15.664  22.984  19.528
ATOM   6590  H2  HOH A1508      15.813  23.504  20.924
ATOM   6591  O   HOH A1509      16.612   8.030  23.653
ATOM   6592  H1  HOH A1509      16.829   8.945  23.999
ATOM   6593  H2  HOH A1509      15.790   8.292  23.134
ATOM   6594  O   HOH A1510      20.694  10.046  24.203
ATOM   6595  H1  HOH A1510      19.973  10.299  23.544
ATOM   6596  H2  HOH A1510      21.379   9.766  23.528
ATOM   6597  O   HOH A1511      28.981  24.396  23.119
ATOM   6598  H1  HOH A1511      28.007  24.338  22.819
ATOM   6599  H2  HOH A1511      29.002  23.457  23.513
ATOM   6600  O   HOH A1512      13.529   6.485  23.548
ATOM   6601  H1  HOH A1512      12.847   6.615  24.301
ATOM   6602  H2  HOH A1512      12.885   5.904  22.989
ATOM   6603  O   HOH A1513      16.181  24.860  21.515
ATOM   6604  H1  HOH A1513      16.019  24.717  22.498
ATOM   6605  H2  HOH A1513      15.547  25.626  21.393
ATOM   6606  O   HOH A1514      22.236   5.780  22.341
ATOM   6607  H1  HOH A1514      22.761   4.995  22.723
ATOM   6608  H2  HOH A1514      22.374   6.374  23.158
ATOM   6609  O   HOH A1515      18.840  10.656  22.566
ATOM   6610  H1  HOH A1515      18.204  10.435  21.805
ATOM   6611  H2  HOH A1515      18.110  10.643  23.286
ATOM   6612  O   HOH A1516      23.607  22.810  21.758
ATOM   6613  H1  HOH A1516      23.208  22.873  20.825
ATOM   6614  H2  HOH A1516      24.530  22.523  21.443
ATOM   6615  O   HOH A1517      12.849  25.067  20.469
ATOM   6616  H1  HOH A1517      11.970  24.754  20.847
ATOM   6617  H2  HOH A1517      12.782  24.549  19.604
ATOM   6618  O   HOH A1518      15.835  23.496  18.176
ATOM   6619  H1  HOH A1518      15.476  24.371  17.815
ATOM   6620  H2  HOH A1518      15.127  22.907  17.760
ATOM   6621  O   HOH A1519      18.192  23.813  19.001
ATOM   6622  H1  HOH A1519      18.632  23.538  18.123
ATOM   6623  H2  HOH A1519      17.242  23.670  18.667
ATOM   6624  O   HOH A1520      11.557  21.557  15.428
ATOM   6625  H1  HOH A1520      11.117  21.431  16.302
ATOM   6626  H2  HOH A1520      10.699  21.772  14.900
ATOM   6627  O   HOH A1521      10.855  22.212  11.856
ATOM   6628  H1  HOH A1521      10.445  22.108  12.774
ATOM   6629  H2  HOH A1521      11.125  23.183  11.987
ATOM   6630  O   HOH A1522      18.281  25.432  26.833
ATOM   6631  H1  HOH A1522      18.987  24.998  27.383
ATOM   6632  H2  HOH A1522      18.784  25.538  25.985
ATOM   6633  O   HOH A1523      25.872  24.266  14.215
ATOM   6634  H1  HOH A1523      25.589  23.285  14.217
ATOM   6635  H2  HOH A1523      25.147  24.574  13.581
ATOM   6636  O   HOH A1524      14.378   8.635  22.499
ATOM   6637  H1  HOH A1524      13.828   8.629  21.653
ATOM   6638  H2  HOH A1524      13.982   7.782  22.882
ATOM   6639  O   HOH A1525      15.448  24.998  12.247
ATOM   6640  H1  HOH A1525      15.461  24.179  11.637
ATOM   6641  H2  HOH A1525      15.347  24.449  13.102
ATOM   6642  O   HOH A1526      13.088  22.215  10.549
ATOM   6643  H1  HOH A1526      12.276  22.013  11.100
ATOM   6644  H2  HOH A1526      13.029  21.379   9.963
ATOM   6645  O   HOH A1527      24.403   8.583  27.229
ATOM   6646  H1  HOH A1527      23.685   8.892  27.883
ATOM   6647  H2  HOH A1527      24.299   9.372  26.604
ATOM   6648  O   HOH A1528      25.713  25.334  26.853
ATOM   6649  H1  HOH A1528      25.680  24.722  26.065
ATOM   6650  H2  HOH A1528      26.314  24.810  27.434
ATOM   6651  O   HOH A1529      23.571  16.935   1.588
ATOM   6652  H1  HOH A1529      24.001  16.057   1.851
ATOM   6653  H2  HOH A1529      23.018  16.558   0.828
ATOM   6654  O   HOH A1530      20.118  19.259   2.895
ATOM   6655  H1  HOH A1530      20.254  19.576   1.938
ATOM   6656  H2  HOH A1530      21.068  18.940   3.024
ATOM   6657  O   HOH A1531      13.947  19.698   1.499
ATOM   6658  H1  HOH A1531      14.876  19.784   1.894
ATOM   6659  H2  HOH A1531      14.163  18.915   0.893
ATOM   6660  O   HOH A1532      22.014  23.587  -3.250
ATOM   6661  H1  HOH A1532      21.115  23.380  -3.646
ATOM   6662  H2  HOH A1532      22.560  23.109  -3.952
ATOM   6663  O   HOH A1533      12.155  20.932   2.746
ATOM   6664  H1  HOH A1533      12.911  20.411   2.310
ATOM   6665  H2  HOH A1533      11.419  20.509   2.177
ATOM   6666  O   HOH A1534      14.918  15.627  -3.838
ATOM   6667  H1  HOH A1534      15.629  15.083  -3.340
ATOM   6668  H2  HOH A1534      14.440  14.822  -4.221
ATOM   6669  O   HOH A1535      12.981  15.749   0.481
ATOM   6670  H1  HOH A1535      12.559  14.884   0.684
ATOM   6671  H2  HOH A1535      12.254  16.210   0.005
ATOM   6672  O   HOH A1536      19.960  24.087  -0.815
ATOM   6673  H1  HOH A1536      19.748  24.972  -1.247
ATOM   6674  H2  HOH A1536      20.951  24.160  -0.829
ATOM   6675  O   HOH A1537      16.971  24.179   1.095
ATOM   6676  H1  HOH A1537      16.542  24.575   1.913
ATOM   6677  H2  HOH A1537      17.904  24.506   1.285
ATOM   6678  O   HOH A1538      14.475  17.902  -0.202
ATOM   6679  H1  HOH A1538      13.882  17.110   0.025
ATOM   6680  H2  HOH A1538      14.292  17.866  -1.205
ATOM   6681  O   HOH A1539      23.113  12.538   5.186
ATOM   6682  H1  HOH A1539      22.264  12.158   4.821
ATOM   6683  H2  HOH A1539      22.723  12.905   6.051
ATOM   6684  O   HOH A1540      20.607  20.053   0.557
ATOM   6685  H1  HOH A1540      21.320  20.765   0.740
ATOM   6686  H2  HOH A1540      20.037  20.671  -0.017
ATOM   6687  O   HOH A1541      16.941  15.810   2.282
ATOM   6688  H1  HOH A1541      17.154  16.608   2.803
ATOM   6689  H2  HOH A1541      17.461  15.976   1.484
ATOM   6690  O   HOH A1542      23.237  14.942   4.340
ATOM   6691  H1  HOH A1542      23.881  14.875   3.562
ATOM   6692  H2  HOH A1542      23.257  13.967   4.586
ATOM   6693  O   HOH A1543      15.171  21.795   3.920
ATOM   6694  H1  HOH A1543      14.766  22.405   3.269
ATOM   6695  H2  HOH A1543      15.690  21.221   3.268
ATOM   6696  O   HOH A1544       9.791  18.370  -4.245
ATOM   6697  H1  HOH A1544       8.950  18.576  -4.742
ATOM   6698  H2  HOH A1544       9.791  19.220  -3.683
ATOM   6699  O   HOH A1545      26.022  21.568   2.905
ATOM   6700  H1  HOH A1545      26.896  21.304   2.423
ATOM   6701  H2  HOH A1545      26.042  20.782   3.534
ATOM   6702  O   HOH A1546      25.215  13.435  -0.874
ATOM   6703  H1  HOH A1546      24.791  13.028  -1.710
ATOM   6704  H2  HOH A1546      24.856  14.373  -1.066
ATOM   6705  O   HOH A1547      22.528  23.626  -0.843
ATOM   6706  H1  HOH A1547      22.312  23.527  -1.843
ATOM   6707  H2  HOH A1547      23.470  23.977  -1.013
ATOM   6708  O   HOH A1548      23.247  22.500  -5.193
ATOM   6709  H1  HOH A1548      23.030  21.585  -5.581
ATOM   6710  H2  HOH A1548      22.518  22.985  -5.727
ATOM   6711  O   HOH A1549      22.215  21.941   0.947
ATOM   6712  H1  HOH A1549      22.340  22.635   0.200
ATOM   6713  H2  HOH A1549      23.188  21.647   0.942
ATOM   6714  O   HOH A1550      20.555  17.885  -0.866
ATOM   6715  H1  HOH A1550      19.792  17.507  -0.333
ATOM   6716  H2  HOH A1550      20.634  18.749  -0.355
ATOM   6717  O   HOH A1551      18.292  15.029  -4.399
ATOM   6718  H1  HOH A1551      17.621  14.735  -3.672
ATOM   6719  H2  HOH A1551      18.657  15.801  -3.844
ATOM   6720  O   HOH A1552      23.939  18.829   5.240
ATOM   6721  H1  HOH A1552      23.351  19.680   5.449
ATOM   6722  H2  HOH A1552      23.384  18.631   4.395
ATOM   6723  O   HOH A1553      24.901  21.670  -1.658
ATOM   6724  H1  HOH A1553      24.806  22.673  -1.584
ATOM   6725  H2  HOH A1553      24.778  21.487  -0.668
ATOM   6726  O   HOH A1554      21.125  16.334   4.108
ATOM   6727  H1  HOH A1554      21.856  15.643   4.113
ATOM   6728  H2  HOH A1554      20.630  15.965   3.293
ATOM   6729  O   HOH A1555      16.264  20.096   2.381
ATOM   6730  H1  HOH A1555      16.882  19.347   2.657
ATOM   6731  H2  HOH A1555      16.764  20.343   1.532
ATOM   6732  O   HOH A1556      22.674  22.751   7.158
ATOM   6733  H1  HOH A1556      22.261  23.517   6.648
ATOM   6734  H2  HOH A1556      22.343  23.025   8.067
ATOM   6735  O   HOH A1557      15.017  19.422   5.203
ATOM   6736  H1  HOH A1557      14.270  18.941   4.785
ATOM   6737  H2  HOH A1557      15.076  20.234   4.661
ATOM   6738  O   HOH A1558      20.668  17.422  -5.184
ATOM   6739  H1  HOH A1558      21.358  16.712  -5.351
ATOM   6740  H2  HOH A1558      21.283  18.118  -4.803
ATOM   6741  O   HOH A1559      12.798  15.422   8.764
ATOM   6742  H1  HOH A1559      11.980  15.561   9.283
ATOM   6743  H2  HOH A1559      13.024  14.476   8.923
ATOM   6744  O   HOH A1560      19.324  25.048   1.403
ATOM   6745  H1  HOH A1560      19.956  24.478   1.958
ATOM   6746  H2  HOH A1560      19.583  24.612   0.517
ATOM   6747  O   HOH A1561      14.987  20.566   7.549
ATOM   6748  H1  HOH A1561      14.876  21.459   7.071
ATOM   6749  H2  HOH A1561      15.099  20.032   6.686
ATOM   6750  O   HOH A1562      23.778   9.349  -5.676
ATOM   6751  H1  HOH A1562      22.899   9.683  -6.070
ATOM   6752  H2  HOH A1562      24.110  10.275  -5.410
ATOM   6753  O   HOH A1563      14.200  17.797  -2.708
ATOM   6754  H1  HOH A1563      13.385  17.916  -3.330
ATOM   6755  H2  HOH A1563      14.480  16.916  -3.129
ATOM   6756  O   HOH A1564      28.712  22.264   9.095
ATOM   6757  H1  HOH A1564      29.098  23.144   9.387
ATOM   6758  H2  HOH A1564      28.154  22.606   8.339
ATOM   6759  O   HOH A1565      11.676  13.459   0.910
ATOM   6760  H1  HOH A1565      12.234  12.660   0.932
ATOM   6761  H2  HOH A1565      10.869  13.147   0.459
ATOM   6762  O   HOH A1566      11.278  19.601  -0.903
ATOM   6763  H1  HOH A1566      10.724  19.841  -1.703
ATOM   6764  H2  HOH A1566      11.217  18.602  -1.003
ATOM   6765  O   HOH A1567      24.575  19.282   7.738
ATOM   6766  H1  HOH A1567      25.423  18.720   7.721
ATOM   6767  H2  HOH A1567      24.270  19.044   6.819
ATOM   6768  O   HOH A1568      17.927  24.196   7.500
ATOM   6769  H1  HOH A1568      18.583  23.672   8.064
ATOM   6770  H2  HOH A1568      18.249  25.113   7.782
ATOM   6771  O   HOH A1569      24.618  26.707  -4.664
ATOM   6772  H1  HOH A1569      23.797  26.411  -4.124
ATOM   6773  H2  HOH A1569      24.817  27.497  -4.034
ATOM   6774  O   HOH A1570      15.964  24.150  -1.166
ATOM   6775  H1  HOH A1570      15.808  23.150  -1.234
ATOM   6776  H2  HOH A1570      16.422  24.107  -0.249
ATOM   6777  O   HOH A1571      21.147  26.091  -6.050
ATOM   6778  H1  HOH A1571      21.858  26.204  -6.774
ATOM   6779  H2  HOH A1571      21.236  25.069  -6.038
ATOM   6780  O   HOH A1572      22.762  26.028  -3.109
ATOM   6781  H1  HOH A1572      22.503  25.056  -3.112
ATOM   6782  H2  HOH A1572      22.577  26.185  -2.120
ATOM   6783  O   HOH A1573      24.916  13.376   8.036
ATOM   6784  H1  HOH A1573      25.062  14.380   8.094
ATOM   6785  H2  HOH A1573      23.936  13.434   7.814
ATOM   6786  O   HOH A1574      13.023  17.923   4.249
ATOM   6787  H1  HOH A1574      13.476  17.367   3.575
ATOM   6788  H2  HOH A1574      12.947  17.290   4.993
ATOM   6789  O   HOH A1575      20.857  16.997   6.490
ATOM   6790  H1  HOH A1575      21.841  16.877   6.633
ATOM   6791  H2  HOH A1575      20.874  16.728   5.502
ATOM   6792  O   HOH A1576      21.640  14.955   9.377
ATOM   6793  H1  HOH A1576      21.569  14.145   9.992
ATOM   6794  H2  HOH A1576      22.120  15.538  10.051
ATOM   6795  O   HOH A1577      19.329  16.970  -3.136
ATOM   6796  H1  HOH A1577      19.965  17.209  -2.418
ATOM   6797  H2  HOH A1577      19.930  17.162  -3.927
ATOM   6798  O   HOH A1578      22.242  16.121  -0.413
ATOM   6799  H1  HOH A1578      21.567  15.396  -0.653
ATOM   6800  H2  HOH A1578      21.602  16.891  -0.626
ATOM   6801  O   HOH A1579       9.771  14.035  -6.034
ATOM   6802  H1  HOH A1579      10.591  14.503  -5.655
ATOM   6803  H2  HOH A1579      10.082  14.063  -6.997
ATOM   6804  O   HOH A1580      19.959  15.511   2.084
ATOM   6805  H1  HOH A1580      19.451  16.081   1.427
ATOM   6806  H2  HOH A1580      19.739  14.633   1.683
ATOM   6807  O   HOH A1581      20.498  14.419  -1.075
ATOM   6808  H1  HOH A1581      19.527  14.730  -1.299
ATOM   6809  H2  HOH A1581      20.178  13.862  -0.286
ATOM   6810  O   HOH A1582      16.924  18.420  -5.920
ATOM   6811  H1  HOH A1582      16.326  17.615  -6.027
ATOM   6812  H2  HOH A1582      16.947  18.464  -4.945
ATOM   6813  O   HOH A1583      12.686  16.273   6.287
ATOM   6814  H1  HOH A1583      12.822  15.877   7.176
ATOM   6815  H2  HOH A1583      11.836  16.737   6.417
ATOM   6816  O   HOH A1584      18.606  16.712   0.288
ATOM   6817  H1  HOH A1584      17.922  17.363  -0.110
ATOM   6818  H2  HOH A1584      18.409  15.982  -0.435
ATOM   6819  O   HOH A1585       9.494  12.632  -0.481
ATOM   6820  H1  HOH A1585       8.754  12.285   0.057
ATOM   6821  H2  HOH A1585       9.076  13.374  -0.969
ATOM   6822  O   HOH A1586      15.457  15.831   6.642
ATOM   6823  H1  HOH A1586      14.560  15.948   6.286
ATOM   6824  H2  HOH A1586      15.399  14.930   7.044
ATOM   6825  O   HOH A1587      15.453  19.990  -3.244
ATOM   6826  H1  HOH A1587      14.914  19.155  -3.062
ATOM   6827  H2  HOH A1587      16.359  19.529  -3.199
ATOM   6828  O   HOH A1588      24.619  21.213   0.828
ATOM   6829  H1  HOH A1588      25.156  21.475   1.650
ATOM   6830  H2  HOH A1588      24.824  20.219   0.910
ATOM   6831  O   HOH A1589      19.220  18.965   6.437
ATOM   6832  H1  HOH A1589      19.833  18.167   6.486
ATOM   6833  H2  HOH A1589      18.396  18.452   6.137
ATOM   6834  O   HOH A1590      22.256  15.459  -5.578
ATOM   6835  H1  HOH A1590      22.845  15.594  -6.388
ATOM   6836  H2  HOH A1590      23.018  15.281  -4.930
ATOM   6837  O   HOH A1591      13.170  21.184  -0.353
ATOM   6838  H1  HOH A1591      12.416  20.556  -0.627
ATOM   6839  H2  HOH A1591      13.469  20.614   0.436
ATOM   6840  O   HOH A1592      19.291  21.645  -0.893
ATOM   6841  H1  HOH A1592      19.425  21.448  -1.861
ATOM   6842  H2  HOH A1592      19.546  22.622  -0.919
ATOM   6843  O   HOH A1593      14.287  13.806  11.312
ATOM   6844  H1  HOH A1593      13.646  14.536  11.503
ATOM   6845  H2  HOH A1593      13.952  13.452  10.449
ATOM   6846  O   HOH A1594      19.186  20.436   8.484
ATOM   6847  H1  HOH A1594      19.182  19.869   7.644
ATOM   6848  H2  HOH A1594      18.224  20.242   8.740
ATOM   6849  O   HOH A1595      26.170  16.160  -7.189
ATOM   6850  H1  HOH A1595      25.190  16.016  -7.414
ATOM   6851  H2  HOH A1595      26.183  17.144  -7.426
ATOM   6852  O   HOH A1596      26.646  17.854   7.698
ATOM   6853  H1  HOH A1596      27.532  17.664   7.212
ATOM   6854  H2  HOH A1596      27.124  18.242   8.521
ATOM   6855  O   HOH A1597      25.683  22.901  -4.932
ATOM   6856  H1  HOH A1597      24.679  22.717  -5.029
ATOM   6857  H2  HOH A1597      25.896  22.724  -5.906
ATOM   6858  O   HOH A1598      20.940  23.450   2.516
ATOM   6859  H1  HOH A1598      21.423  22.786   1.919
ATOM   6860  H2  HOH A1598      21.791  23.880   2.876
ATOM   6861  O   HOH A1599      17.225  20.651   0.147
ATOM   6862  H1  HOH A1599      18.047  21.105  -0.237
ATOM   6863  H2  HOH A1599      16.558  21.161  -0.419
ATOM   6864  O   HOH A1600      10.391  16.086  -3.274
ATOM   6865  H1  HOH A1600      10.998  15.770  -4.020
ATOM   6866  H2  HOH A1600      10.126  16.956  -3.719
ATOM   6867  O   HOH A1601      16.941  18.289  -0.653
ATOM   6868  H1  HOH A1601      17.010  19.226  -0.273
ATOM   6869  H2  HOH A1601      15.972  18.144  -0.400
ATOM   6870  O   HOH A1602      17.512  24.481   5.026
ATOM   6871  H1  HOH A1602      17.562  24.254   6.016
ATOM   6872  H2  HOH A1602      18.316  23.898   4.774
ATOM   6873  O   HOH A1603      19.610  23.198   4.594
ATOM   6874  H1  HOH A1603      19.749  22.196   4.734
ATOM   6875  H2  HOH A1603      20.086  23.224   3.693
ATOM   6876  O   HOH A1604      21.298  23.614  -6.216
ATOM   6877  H1  HOH A1604      20.788  23.462  -7.082
ATOM   6878  H2  HOH A1604      20.560  23.302  -5.598
ATOM   6879  O   HOH A1605      19.429  22.873   9.034
ATOM   6880  H1  HOH A1605      20.416  22.905   9.152
ATOM   6881  H2  HOH A1605      19.361  21.882   8.820
ATOM   6882  O   HOH A1606      11.823  23.572  -6.481
ATOM   6883  H1  HOH A1606      12.326  24.451  -6.340
ATOM   6884  H2  HOH A1606      10.940  23.912  -6.149
ATOM   6885  O   HOH A1607      21.917  19.371  -4.114
ATOM   6886  H1  HOH A1607      22.209  19.776  -5.010
ATOM   6887  H2  HOH A1607      22.819  19.515  -3.670
ATOM   6888  O   HOH A1608      10.332  22.751   7.038
ATOM   6889  H1  HOH A1608      10.556  21.825   7.409
ATOM   6890  H2  HOH A1608       9.325  22.540   6.955
ATOM   6891  O   HOH A1609      16.792  20.012   9.184
ATOM   6892  H1  HOH A1609      16.503  19.034   9.131
ATOM   6893  H2  HOH A1609      16.070  20.330   8.530
ATOM   6894  O   HOH A1610      17.309  23.712  -4.564
ATOM   6895  H1  HOH A1610      17.248  24.093  -5.502
ATOM   6896  H2  HOH A1610      16.565  23.035  -4.676
ATOM   6897  O   HOH A1611      12.369  18.130  -4.328
ATOM   6898  H1  HOH A1611      11.383  18.265  -4.388
ATOM   6899  H2  HOH A1611      12.629  18.689  -5.121
ATOM   6900  O   HOH A1612      21.667  12.939  -2.753
ATOM   6901  H1  HOH A1612      21.148  13.223  -3.566
ATOM   6902  H2  HOH A1612      21.196  13.540  -2.095
ATOM   6903  O   HOH A1613      19.732  22.955  -4.388
ATOM   6904  H1  HOH A1613      19.565  22.039  -3.999
ATOM   6905  H2  HOH A1613      18.764  23.243  -4.417
ATOM   6906  O   HOH A1614      19.168  26.289  -1.755
ATOM   6907  H1  HOH A1614      19.678  26.577  -2.580
ATOM   6908  H2  HOH A1614      18.310  26.052  -2.237
ATOM   6909  O   HOH A1615      22.414  13.516   7.369
ATOM   6910  H1  HOH A1615      22.118  14.255   7.989
ATOM   6911  H2  HOH A1615      21.903  12.780   7.925
ATOM   6912  O   HOH A1616      25.221  18.764   1.041
ATOM   6913  H1  HOH A1616      24.543  18.057   1.305
ATOM   6914  H2  HOH A1616      25.943  18.496   1.639
ATOM   6915  O   HOH A1617      15.350  19.737  -7.483
ATOM   6916  H1  HOH A1617      15.681  19.321  -8.341
ATOM   6917  H2  HOH A1617      16.015  19.283  -6.880
ATOM   6918  O   HOH A1618      11.806  15.225  -5.226
ATOM   6919  H1  HOH A1618      12.234  15.824  -5.916
ATOM   6920  H2  HOH A1618      12.606  14.611  -5.113
ATOM   6921  O   HOH A1619      25.440  23.944   3.755
ATOM   6922  H1  HOH A1619      25.581  22.976   3.491
ATOM   6923  H2  HOH A1619      26.210  24.297   3.194
ATOM   6924  O   HOH A1620      13.847  24.094   2.253
ATOM   6925  H1  HOH A1620      14.640  24.589   2.641
ATOM   6926  H2  HOH A1620      13.855  24.553   1.361
ATOM   6927  O   HOH A1621       9.879  20.484  -2.881
ATOM   6928  H1  HOH A1621       9.037  21.052  -2.833
ATOM   6929  H2  HOH A1621      10.498  21.254  -3.092
ATOM   6930  O   HOH A1622      14.037  25.720   8.433
ATOM   6931  H1  HOH A1622      14.716  24.965   8.448
ATOM   6932  H2  HOH A1622      13.368  25.248   9.041
ATOM   6933  O   HOH A1623      17.305  24.843  -6.825
ATOM   6934  H1  HOH A1623      17.967  25.615  -6.762
ATOM   6935  H2  HOH A1623      17.563  24.576  -7.766
ATOM   6936  O   HOH A1624      21.041  19.536   9.925
ATOM   6937  H1  HOH A1624      20.325  19.885   9.295
ATOM   6938  H2  HOH A1624      20.466  18.799  10.319
ATOM   6939  O   HOH A1625      21.954  23.329   9.533
ATOM   6940  H1  HOH A1625      22.873  23.652   9.868
ATOM   6941  H2  HOH A1625      21.499  24.224   9.824
ATOM   6942  O   HOH A1626      24.616  20.574  -7.822
ATOM   6943  H1  HOH A1626      25.187  21.393  -7.616
ATOM   6944  H2  HOH A1626      24.173  20.982  -8.639
ATOM   6945  O   HOH A1627      16.450  18.711  -9.573
ATOM   6946  H1  HOH A1627      17.276  18.149  -9.400
ATOM   6947  H2  HOH A1627      16.941  19.504  -9.963
ATOM   6948  O   HOH A1628      17.048  17.722   5.627
ATOM   6949  H1  HOH A1628      16.295  18.338   5.501
ATOM   6950  H2  HOH A1628      16.593  16.907   5.929
ATOM   6951  O   HOH A1629      19.206  18.394  -7.031
ATOM   6952  H1  HOH A1629      18.323  18.438  -6.543
ATOM   6953  H2  HOH A1629      19.735  17.986  -6.275
ATOM   6954  O   HOH A1630      23.337  18.437   9.873
ATOM   6955  H1  HOH A1630      23.782  18.821   9.071
ATOM   6956  H2  HOH A1630      22.472  18.935   9.808
ATOM   6957  O   HOH A1631      17.610  18.749  -3.034
ATOM   6958  H1  HOH A1631      17.358  18.535  -2.065
ATOM   6959  H2  HOH A1631      18.279  17.977  -3.103
ATOM   6960  O   HOH A1632      18.421  17.224  -9.085
ATOM   6961  H1  HOH A1632      19.275  16.732  -9.331
ATOM   6962  H2  HOH A1632      18.811  17.691  -8.270
ATOM   6963  O   HOH A1633      20.064  20.771   4.897
ATOM   6964  H1  HOH A1633      20.035  20.178   4.071
ATOM   6965  H2  HOH A1633      19.681  20.070   5.526
ATOM   6966  O   HOH A1634      25.196  15.662  10.704
ATOM   6967  H1  HOH A1634      25.171  15.774   9.698
ATOM   6968  H2  HOH A1634      26.100  16.127  10.825
ATOM   6969  O   HOH A1635      17.791  18.216   3.123
ATOM   6970  H1  HOH A1635      17.716  18.033   4.102
ATOM   6971  H2  HOH A1635      18.736  18.549   3.111
ATOM   6972  O   HOH A1636      19.572  15.798   8.267
ATOM   6973  H1  HOH A1636      20.413  15.437   8.708
ATOM   6974  H2  HOH A1636      20.055  16.277   7.518
ATOM   6975  O   HOH A1637      22.428  18.293   3.336
ATOM   6976  H1  HOH A1637      22.888  17.765   2.595
ATOM   6977  H2  HOH A1637      21.888  17.496   3.680
ATOM   6978  O   HOH A1638      15.442  16.373  -6.215
ATOM   6979  H1  HOH A1638      15.209  16.119  -5.266
ATOM   6980  H2  HOH A1638      16.050  15.594  -6.397
ATOM   6981  O   HOH A1639      14.668  22.706   6.274
ATOM   6982  H1  HOH A1639      13.751  23.075   6.058
ATOM   6983  H2  HOH A1639      14.902  22.442   5.329
ATOM   6984  O   HOH A1640      21.657  10.154  -6.708
ATOM   6985  H1  HOH A1640      20.873   9.479  -6.617
ATOM   6986  H2  HOH A1640      21.036  10.964  -6.680
ATOM   6987  O   HOH A1641      13.788  12.758  -7.498
ATOM   6988  H1  HOH A1641      13.358  13.537  -8.004
ATOM   6989  H2  HOH A1641      14.350  12.459  -8.281
ATOM   6990  O   HOH A1642      18.654  26.691   5.498
ATOM   6991  H1  HOH A1642      18.489  26.659   6.496
ATOM   6992  H2  HOH A1642      18.182  25.829   5.279
ATOM   6993  O   HOH A1643      17.483  11.786  -6.650
ATOM   6994  H1  HOH A1643      17.330  11.564  -7.636
ATOM   6995  H2  HOH A1643      17.092  10.865  -6.343
ATOM   6996  O   HOH A1644      20.514  26.978  -3.777
ATOM   6997  H1  HOH A1644      21.444  26.733  -3.446
ATOM   6998  H2  HOH A1644      20.692  26.645  -4.727
ATOM   6999  O   HOH A1645      15.343  22.266  -7.409
ATOM   7000  H1  HOH A1645      15.508  22.240  -6.421
ATOM   7001  H2  HOH A1645      15.365  21.264  -7.548
ATOM   7002  O   HOH A1646      12.227  23.453  -0.940
ATOM   7003  H1  HOH A1646      12.637  22.601  -0.592
ATOM   7004  H2  HOH A1646      12.926  24.082  -0.591
ATOM   7005  O   HOH A1647      15.449  21.685  -1.324
ATOM   7006  H1  HOH A1647      14.516  21.503  -0.969
ATOM   7007  H2  HOH A1647      15.383  21.074  -2.122
ATOM   7008  O   HOH A1648       9.373  24.148   2.971
ATOM   7009  H1  HOH A1648      10.309  23.774   3.108
ATOM   7010  H2  HOH A1648       9.673  25.121   2.948
ATOM   7011  O   HOH A1649      24.973  21.776   7.836
ATOM   7012  H1  HOH A1649      24.089  22.117   7.512
ATOM   7013  H2  HOH A1649      24.758  20.792   7.766
ATOM   7014  O   HOH A1650      22.668  20.313  -6.270
ATOM   7015  H1  HOH A1650      21.970  20.162  -7.004
ATOM   7016  H2  HOH A1650      23.461  20.309  -6.907
ATOM   7017  O   HOH A1651      26.045  19.025  -4.935
ATOM   7018  H1  HOH A1651      26.839  19.424  -4.460
ATOM   7019  H2  HOH A1651      25.340  19.390  -4.322
ATOM   7020  O   HOH A1652      11.084  16.954  -0.897
ATOM   7021  H1  HOH A1652      10.146  16.940  -0.608
ATOM   7022  H2  HOH A1652      11.006  16.629  -1.821
ATOM   7023  O   HOH A1653      28.071  20.772   1.760
ATOM   7024  H1  HOH A1653      28.560  19.910   1.943
ATOM   7025  H2  HOH A1653      28.643  21.100   1.035
ATOM   7026  O   HOH A1654      22.508  20.714   5.716
ATOM   7027  H1  HOH A1654      21.559  20.807   5.413
ATOM   7028  H2  HOH A1654      22.534  21.542   6.294
ATOM   7029  O   HOH A1655      26.195  18.691  -7.410
ATOM   7030  H1  HOH A1655      25.506  19.416  -7.627
ATOM   7031  H2  HOH A1655      26.156  18.855  -6.402
ATOM   7032  O   HOH A1656      20.459  13.749  -4.828
ATOM   7033  H1  HOH A1656      21.084  14.455  -5.168
ATOM   7034  H2  HOH A1656      19.656  14.334  -4.690
ATOM   7035  O   HOH A1657      24.261  19.745  -3.167
ATOM   7036  H1  HOH A1657      24.543  19.063  -2.470
ATOM   7037  H2  HOH A1657      24.470  20.556  -2.591
ATOM   7038  O   HOH A1658      14.332  16.154   2.771
ATOM   7039  H1  HOH A1658      15.264  15.910   2.606
ATOM   7040  H2  HOH A1658      13.893  15.930   1.928
ATOM   7041  O   HOH A1659      25.107  15.889   8.192
ATOM   7042  H1  HOH A1659      24.403  16.170   7.517
ATOM   7043  H2  HOH A1659      25.759  16.631   7.962
ATOM   7044  O   HOH A1660       6.985  13.862  -3.783
ATOM   7045  H1  HOH A1660       7.179  14.545  -4.481
ATOM   7046  H2  HOH A1660       7.558  14.253  -3.055
ATOM   7047  O   HOH A1661      24.766  14.850   2.336
ATOM   7048  H1  HOH A1661      24.927  13.890   2.044
ATOM   7049  H2  HOH A1661      25.717  15.159   2.154
ATOM   7050  O   HOH A1662      23.465  16.542   6.347
ATOM   7051  H1  HOH A1662      23.432  15.919   5.560
ATOM   7052  H2  HOH A1662      23.715  17.371   5.851
ATOM   7053  O   HOH A1663      13.808  13.704  -5.037
ATOM   7054  H1  HOH A1663      13.894  13.299  -5.951
ATOM   7055  H2  HOH A1663      13.831  12.814  -4.529
ATOM   7056  O   HOH A1664      12.302  10.637  -7.370
ATOM   7057  H1  HOH A1664      12.525  10.351  -6.405
ATOM   7058  H2  HOH A1664      12.824  11.494  -7.332
ATOM   7059  O   HOH A1665      25.164  18.147  -1.429
ATOM   7060  H1  HOH A1665      26.169  18.136  -1.582
ATOM   7061  H2  HOH A1665      25.211  18.454  -0.469
ATOM   7062  O   HOH A1666      25.249  12.531   1.486
ATOM   7063  H1  HOH A1666      25.235  12.835   0.516
ATOM   7064  H2  HOH A1666      24.784  11.684   1.374
ATOM   7065  O   HOH A1667      24.379  12.100  -7.594
ATOM   7066  H1  HOH A1667      25.364  12.050  -7.824
ATOM   7067  H2  HOH A1667      24.497  11.973  -6.598
ATOM   7068  O   HOH A1668      24.092  12.776  -3.011
ATOM   7069  H1  HOH A1668      23.066  12.775  -2.872
ATOM   7070  H2  HOH A1668      24.098  13.691  -3.459
ATOM   7071  O   HOH A1669      24.877  24.204  -1.487
ATOM   7072  H1  HOH A1669      25.362  24.590  -2.285
ATOM   7073  H2  HOH A1669      25.612  24.428  -0.814
ATOM   7074  O   HOH A1670      12.932  20.088   9.036
ATOM   7075  H1  HOH A1670      13.133  19.180   9.356
ATOM   7076  H2  HOH A1670      13.722  20.269   8.472
ATOM   7077  O   HOH A1671      15.910  25.243   3.163
ATOM   7078  H1  HOH A1671      15.879  26.229   3.348
ATOM   7079  H2  HOH A1671      16.491  24.985   3.942
ATOM   7080  O   HOH A1672      26.704  24.955   5.884
ATOM   7081  H1  HOH A1672      26.138  24.571   5.155
ATOM   7082  H2  HOH A1672      26.902  24.080   6.355
ATOM   7083  O   HOH A1673      12.347  23.650   5.784
ATOM   7084  H1  HOH A1673      11.522  23.267   6.230
ATOM   7085  H2  HOH A1673      12.022  23.524   4.835
ATOM   7086  O   HOH A1674      22.940  24.563   3.505
ATOM   7087  H1  HOH A1674      23.037  25.311   2.831
ATOM   7088  H2  HOH A1674      23.923  24.367   3.603
ATOM   7089  O   HOH A1675      11.733  23.304   3.350
ATOM   7090  H1  HOH A1675      11.910  22.322   3.105
ATOM   7091  H2  HOH A1675      12.575  23.647   2.878
ATOM   7092  O   HOH A1676      15.653  27.789   3.522
ATOM   7093  H1  HOH A1676      14.842  27.869   4.133
ATOM   7094  H2  HOH A1676      15.348  28.509   2.875
ATOM   7095  O   HOH A1677      18.697  27.326   0.516
ATOM   7096  H1  HOH A1677      18.928  26.449   0.980
ATOM   7097  H2  HOH A1677      18.930  26.989  -0.416
ATOM   7098  O   HOH A1678      11.378  22.546  -3.189
ATOM   7099  H1  HOH A1678      11.794  22.886  -2.329
ATOM   7100  H2  HOH A1678      10.616  23.217  -3.184
ATOM   7101  O   HOH A1679      10.461  10.224  -4.272
ATOM   7102  H1  HOH A1679      11.422  10.125  -4.577
ATOM   7103  H2  HOH A1679      10.639  10.997  -3.635
ATOM   7104  O   HOH A1680      20.031  12.070  -6.685
ATOM   7105  H1  HOH A1680      20.164  12.675  -5.892
ATOM   7106  H2  HOH A1680      19.042  11.943  -6.589
ATOM   7107  O   HOH A1681      13.000  21.900  -5.039
ATOM   7108  H1  HOH A1681      12.544  22.565  -5.669
ATOM   7109  H2  HOH A1681      12.379  22.104  -4.257
ATOM   7110  O   HOH A1682      13.946  11.544  -3.854
ATOM   7111  H1  HOH A1682      13.422  10.855  -4.444
ATOM   7112  H2  HOH A1682      14.029  10.888  -3.082
ATOM   7113  O   HOH A1683      18.526  24.474  10.797
ATOM   7114  H1  HOH A1683      18.748  23.769  10.112
ATOM   7115  H2  HOH A1683      18.424  23.840  11.580
ATOM   7116  O   HOH A1684      26.098  24.974  -3.596
ATOM   7117  H1  HOH A1684      25.897  24.180  -4.196
ATOM   7118  H2  HOH A1684      25.535  25.638  -4.109
ATOM   7119  O   HOH A1685      17.027  25.582  -2.883
ATOM   7120  H1  HOH A1685      17.140  24.842  -3.570
ATOM   7121  H2  HOH A1685      16.573  24.975  -2.188
ATOM   7122  O   HOH A1686      15.486  21.988  -4.852
ATOM   7123  H1  HOH A1686      14.463  22.007  -4.897
ATOM   7124  H2  HOH A1686      15.522  21.179  -4.242
ATOM   7125  O   HOH A1687      25.318  21.999  10.322
ATOM   7126  H1  HOH A1687      25.204  21.905   9.316
ATOM   7127  H2  HOH A1687      24.885  22.922  10.368
ATOM   7128  O   HOH A1688      20.074  15.297 -18.490
ATOM   7129  H1  HOH A1688      19.188  15.381 -18.968
ATOM   7130  H2  HOH A1688      19.683  15.434 -17.557
ATOM   7131  O   HOH A1689      19.979  20.106 -15.711
ATOM   7132  H1  HOH A1689      20.140  19.110 -15.645
ATOM   7133  H2  HOH A1689      19.527  20.077 -16.617
ATOM   7134  O   HOH A1690      13.788  21.261 -15.192
ATOM   7135  H1  HOH A1690      12.839  21.184 -14.830
ATOM   7136  H2  HOH A1690      14.213  21.243 -14.253
ATOM   7137  O   HOH A1691      14.415  23.582 -15.997
ATOM   7138  H1  HOH A1691      14.791  23.245 -16.878
ATOM   7139  H2  HOH A1691      14.167  22.657 -15.652
ATOM   7140  O   HOH A1692      10.376  15.190 -20.366
ATOM   7141  H1  HOH A1692       9.894  16.051 -20.443
ATOM   7142  H2  HOH A1692       9.692  14.582 -20.744
ATOM   7143  O   HOH A1693      11.692  17.343 -15.774
ATOM   7144  H1  HOH A1693      12.368  16.804 -15.237
ATOM   7145  H2  HOH A1693      12.204  17.301 -16.645
ATOM   7146  O   HOH A1694      18.192  21.614 -14.707
ATOM   7147  H1  HOH A1694      18.981  21.041 -14.963
ATOM   7148  H2  HOH A1694      18.714  22.441 -14.470
ATOM   7149  O   HOH A1695      12.428  12.893 -12.761
ATOM   7150  H1  HOH A1695      12.638  12.210 -12.057
ATOM   7151  H2  HOH A1695      12.314  13.679 -12.137
ATOM   7152  O   HOH A1696      18.970  15.688 -16.263
ATOM   7153  H1  HOH A1696      18.831  14.898 -15.636
ATOM   7154  H2  HOH A1696      17.979  15.853 -16.417
ATOM   7155  O   HOH A1697      14.885  12.477 -20.124
ATOM   7156  H1  HOH A1697      13.904  12.408 -19.897
ATOM   7157  H2  HOH A1697      14.809  12.569 -21.088
ATOM   7158  O   HOH A1698      21.546  17.366 -18.850
ATOM   7159  H1  HOH A1698      22.312  16.954 -18.339
ATOM   7160  H2  HOH A1698      20.933  16.571 -18.781
ATOM   7161  O   HOH A1699      12.716  13.837 -15.101
ATOM   7162  H1  HOH A1699      12.911  14.777 -14.740
ATOM   7163  H2  HOH A1699      12.580  13.424 -14.188
ATOM   7164  O   HOH A1700      15.684  15.933 -14.247
ATOM   7165  H1  HOH A1700      16.239  16.697 -13.865
ATOM   7166  H2  HOH A1700      16.059  15.986 -15.181
ATOM   7167  O   HOH A1701      26.108  18.613 -10.886
ATOM   7168  H1  HOH A1701      26.408  19.225 -11.578
ATOM   7169  H2  HOH A1701      26.791  18.799 -10.187
ATOM   7170  O   HOH A1702      19.788  11.609 -15.166
ATOM   7171  H1  HOH A1702      19.732  11.284 -16.132
ATOM   7172  H2  HOH A1702      19.562  10.700 -14.764
ATOM   7173  O   HOH A1703      14.669  21.399 -12.893
ATOM   7174  H1  HOH A1703      14.104  21.301 -12.041
ATOM   7175  H2  HOH A1703      14.914  22.369 -12.716
ATOM   7176  O   HOH A1704      28.578  17.554 -13.352
ATOM   7177  H1  HOH A1704      28.686  18.252 -12.606
ATOM   7178  H2  HOH A1704      29.296  17.877 -13.926
ATOM   7179  O   HOH A1705      15.062  11.634 -13.765
ATOM   7180  H1  HOH A1705      15.315  12.529 -13.318
ATOM   7181  H2  HOH A1705      14.092  11.760 -13.718
ATOM   7182  O   HOH A1706      15.364  23.771 -12.521
ATOM   7183  H1  HOH A1706      15.695  24.249 -13.340
ATOM   7184  H2  HOH A1706      14.510  24.315 -12.417
ATOM   7185  O   HOH A1707      24.015  24.168 -13.368
ATOM   7186  H1  HOH A1707      23.770  24.681 -12.527
ATOM   7187  H2  HOH A1707      24.418  24.897 -13.869
ATOM   7188  O   HOH A1708      22.541  20.981 -17.862
ATOM   7189  H1  HOH A1708      23.183  21.217 -18.546
ATOM   7190  H2  HOH A1708      21.871  20.491 -18.431
ATOM   7191  O   HOH A1709      19.634  10.774 -17.538
ATOM   7192  H1  HOH A1709      19.577   9.873 -18.033
ATOM   7193  H2  HOH A1709      20.517  11.040 -17.952
ATOM   7194  O   HOH A1710      23.364  19.863 -13.575
ATOM   7195  H1  HOH A1710      22.971  20.372 -14.363
ATOM   7196  H2  HOH A1710      23.963  20.642 -13.271
ATOM   7197  O   HOH A1711      20.904  19.691 -19.321
ATOM   7198  H1  HOH A1711      21.179  18.714 -19.114
ATOM   7199  H2  HOH A1711      20.900  19.605 -20.290
ATOM   7200  O   HOH A1712      22.654  16.516 -15.072
ATOM   7201  H1  HOH A1712      21.761  16.971 -15.182
ATOM   7202  H2  HOH A1712      22.334  15.765 -14.483
ATOM   7203  O   HOH A1713      15.287  17.923 -17.796
ATOM   7204  H1  HOH A1713      14.969  18.880 -17.640
ATOM   7205  H2  HOH A1713      14.349  17.540 -17.889
ATOM   7206  O   HOH A1714      17.778  22.293 -17.131
ATOM   7207  H1  HOH A1714      18.224  21.472 -17.538
ATOM   7208  H2  HOH A1714      17.828  21.964 -16.178
ATOM   7209  O   HOH A1715      13.228  16.102 -14.263
ATOM   7210  H1  HOH A1715      14.252  16.072 -14.251
ATOM   7211  H2  HOH A1715      13.132  16.571 -13.381
ATOM   7212  O   HOH A1716      23.400  25.362 -11.242
ATOM   7213  H1  HOH A1716      22.995  24.815 -10.494
ATOM   7214  H2  HOH A1716      22.593  25.954 -11.388
ATOM   7215  O   HOH A1717      16.352  22.929 -10.423
ATOM   7216  H1  HOH A1717      15.534  23.212  -9.900
ATOM   7217  H2  HOH A1717      16.007  23.298 -11.316
ATOM   7218  O   HOH A1718      15.213  17.298 -11.274
ATOM   7219  H1  HOH A1718      15.639  17.894 -10.569
ATOM   7220  H2  HOH A1718      15.903  17.499 -11.993
ATOM   7221  O   HOH A1719      18.023  24.374  -9.219
ATOM   7222  H1  HOH A1719      17.947  25.123  -9.892
ATOM   7223  H2  HOH A1719      17.381  23.749  -9.704
ATOM   7224  O   HOH A1720      12.247  14.728 -18.845
ATOM   7225  H1  HOH A1720      11.490  14.927 -19.522
ATOM   7226  H2  HOH A1720      12.378  13.777 -19.152
ATOM   7227  O   HOH A1721      29.861  23.460  -7.046
ATOM   7228  H1  HOH A1721      30.442  22.941  -6.407
ATOM   7229  H2  HOH A1721      30.002  22.881  -7.846
ATOM   7230  O   HOH A1722      11.470  21.102 -14.192
ATOM   7231  H1  HOH A1722      10.953  20.977 -15.057
ATOM   7232  H2  HOH A1722      11.326  20.158 -13.858
ATOM   7233  O   HOH A1723      15.481  22.521 -18.039
ATOM   7234  H1  HOH A1723      16.440  22.445 -17.692
ATOM   7235  H2  HOH A1723      15.687  22.904 -18.909
ATOM   7236  O   HOH A1724      25.747  22.555 -10.684
ATOM   7237  H1  HOH A1724      26.543  22.256 -10.153
ATOM   7238  H2  HOH A1724      25.891  23.542 -10.587
ATOM   7239  O   HOH A1725      20.568  22.687 -11.623
ATOM   7240  H1  HOH A1725      21.125  22.712 -12.457
ATOM   7241  H2  HOH A1725      20.191  23.624 -11.723
ATOM   7242  O   HOH A1726      31.700  16.522 -11.263
ATOM   7243  H1  HOH A1726      30.822  16.143 -11.595
ATOM   7244  H2  HOH A1726      31.919  15.724 -10.668
ATOM   7245  O   HOH A1727      11.297  23.481 -13.276
ATOM   7246  H1  HOH A1727      11.530  23.868 -14.175
ATOM   7247  H2  HOH A1727      11.365  22.509 -13.560
ATOM   7248  O   HOH A1728      16.488  12.480 -15.692
ATOM   7249  H1  HOH A1728      15.646  12.780 -16.187
ATOM   7250  H2  HOH A1728      15.980  12.055 -14.924
ATOM   7251  O   HOH A1729      20.044  15.569 -12.104
ATOM   7252  H1  HOH A1729      20.160  15.649 -11.108
ATOM   7253  H2  HOH A1729      19.253  14.951 -12.094
ATOM   7254  O   HOH A1730      25.372  14.411 -12.151
ATOM   7255  H1  HOH A1730      24.432  14.060 -11.936
ATOM   7256  H2  HOH A1730      25.194  15.327 -11.745
ATOM   7257  O   HOH A1731      23.710  15.814  -7.672
ATOM   7258  H1  HOH A1731      23.515  14.959  -8.205
ATOM   7259  H2  HOH A1731      23.339  16.428  -8.400
ATOM   7260  O   HOH A1732      18.490  13.693 -14.808
ATOM   7261  H1  HOH A1732      17.657  13.244 -15.201
ATOM   7262  H2  HOH A1732      19.079  12.863 -14.931
ATOM   7263  O   HOH A1733      15.802  14.257 -18.493
ATOM   7264  H1  HOH A1733      15.172  13.838 -17.804
ATOM   7265  H2  HOH A1733      15.548  13.601 -19.224
ATOM   7266  O   HOH A1734      17.097  15.083  -9.031
ATOM   7267  H1  HOH A1734      17.132  14.912  -8.036
ATOM   7268  H2  HOH A1734      17.581  15.970  -9.010
ATOM   7269  O   HOH A1735      22.252  13.957 -18.251
ATOM   7270  H1  HOH A1735      22.730  14.826 -18.002
ATOM   7271  H2  HOH A1735      21.354  14.402 -18.403
ATOM   7272  O   HOH A1736      14.867  12.245  -9.799
[truncated: 479,610 more chars]
